# Supplementary material for: Towards a general application programming interface (API) for injection molding machines
Source: PeerJ journal article supplement (doi:10.7717/peerj-cs.302), 2020-11-02
Supplement: 100Hz.csv [file 100Hz.csv]

Blow-out_time	Cooling_cycletime	Dosing_volume	FlowNo	cc300://imm/cm#//c.CycleTime/p.sv_dMoldClose1PDP/v	cooling_time	core_movement	current_station	cushion_ideal	cushion_part	cushion_part_end	cycle_time	cycle_time_close	cycle_time_open	cycle_time_removal	decomg_after_plasticzing	decompression	demoduling_time	demolding_cycletime	ejector_cycletime	ejector_pos	flow_nr_plast	flush_time	good_parts	injection_force	injection_peak_post_pressure	injection_peak_pre_pressure	injection_rate	injection_time	iu_peak_rot_part	machine_date	machine_time	max_injection_spped	melt_cushion	mould_time_closing	nozzle_ct	part_counter	plasticizing_time	post_cycle_time_pressure	pressure_mold	pressure_peak	rInjPrOnCutOffPart	rejectcounter	screw_pos	shot_volume	shot_volume_part	shotcounter	start_trigger	stop_trigger	switchover_volume
0	0	0	0	0	0	0	1	0	0	0	269.184	0	0	0	3.4	103.4	0	0	0	-0.085	0	0	43	0	0	0	0	0	0	2019-02-14T01:00:00.000	1970-01-01T16:51:53.779	157	0	0	0	43	0	0	0	0	0	1	0.037	100	0	44	0	0	0
0	0	0	0	0	0	0	1	0	0	0	269.184	0	0	0	3.4	103.4	0	0	0	-0.085	0	0	43	0	0	0	0	0	0	2019-02-14T01:00:00.000	1970-01-01T16:51:53.779	157	0	0	0	43	0	0	0	0	0	1	0.037	100	0	44	0	0	0
0	0	0	0	0	0	0	1	0	0	0	269.184	0	0	0	3.4	103.4	0	0	0	-0.085	0	0	43	0	0	0	0	0	0	2019-02-14T01:00:00.000	1970-01-01T16:51:53.779	157	0	0	0	43	0	0	0	0	0	1	0.037	100	0	44	0	0	0
0	0	0	0	0	0	0	1	0	0	0	269.184	0	0	0	3.4	103.4	0	0	0	-0.085	0	0	43	0	0	0	0	0	0	2019-02-14T01:00:00.000	1970-01-01T16:51:53.779	157	0	0	0	43	0	0	0	0	0	1	0.037	100	0	44	0	0	0
0	0	0	0	0	0	0	1	0	0	0	269.184	0	0	0	3.4	103.4	0	0	0	-0.085	0	0	43	0	0	0	0	0	0	2019-02-14T01:00:00.000	1970-01-01T16:51:53.779	157	0	0	0	43	0	0	0	0	0	1	0.037	100	0	44	0	0	0
0	0	0	0	0	0	0	1	0	0	0	269.184	0	0	0	3.4	103.4	0	0	0	-0.09	0	0	43	0	0	0	0	0	0	2019-02-14T01:00:00.000	1970-01-01T16:51:53.899	157	0	0	0	43	0	0	0	0	0	1	0.03	100	0	44	0	0	0
0	0	0	0	0	0	0	1	0	0	0	269.184	0	0	0	3.4	103.4	0	0	0	-0.09	0	0	43	0	0	0	0	0	0	2019-02-14T01:00:00.000	1970-01-01T16:51:53.899	157	0	0	0	43	0	0	0	0	0	1	0.03	100	0	44	0	0	0
0	0	0	0	0	0	0	1	0	0	0	269.184	0	0	0	3.4	103.4	0	0	0	-0.09	0	0	43	0	0	0	0	0	0	2019-02-14T01:00:00.000	1970-01-01T16:51:53.899	157	0	0	0	43	0	0	0	0	0	1	0.03	100	0	44	0	0	0
0	0	0	0	0	0	0	1	0	0	0	269.184	0	0	0	3.4	103.4	0	0	0	-0.09	0	0	43	0	0	0	0	0	0	2019-02-14T01:00:00.000	1970-01-01T16:51:53.899	157	0	0	0	43	0	0	0	0	0	1	0.03	100	0	44	0	0	0
0	0	0	0	0	0	0	1	0	0	0	269.184	0	0	0	3.4	103.4	0	0	0	-0.09	0	0	43	0	0	0	0	0	0	2019-02-14T01:00:00.000	1970-01-01T16:51:54.209	157	0	0	0	43	0	0	0	0	0	1	0.052	100	0	44	0	0	0
0	0	0	0	0	0	0	1	0	0	0	269.184	0	0	0	3.4	103.4	0	0	0	-0.09	0	0	43	0	0	0	0	0	0	2019-02-14T01:00:00.000	1970-01-01T16:51:54.209	157	0	0	0	43	0	0	0	0	0	1	0.052	100	0	44	0	0	0
0	0	0	0	0	0	0	1	0	0	0	269.184	0	0	0	3.4	103.4	0	0	0	-0.09	0	0	43	0	0	0	0	0	0	2019-02-14T01:00:00.000	1970-01-01T16:51:54.209	157	0	0	0	43	0	0	0	0	0	1	0.052	100	0	44	0	0	0
0	0	0	0	0	0	0	1	0	0	0	269.184	0	0	0	3.4	103.4	0	0	0	-0.09	0	0	43	0	0	0	0	0	0	2019-02-14T01:00:00.000	1970-01-01T16:51:54.209	157	0	0	0	43	0	0	0	0	0	1	0.052	100	0	44	0	0	0
0	0	0	0	0	0	0	1	0	0	0	269.184	0	0	0	3.4	103.4	0	0	0	-0.09	0	0	43	0	0	0	0	0	0	2019-02-14T01:00:00.000	1970-01-01T16:51:54.209	157	0	0	0	43	0	0	0	0	0	1	0.052	100	0	44	0	0	0
0	0	0	0	0	0	0	1	0	0	0	269.184	0	0	0	3.4	103.4	0	0	0	-0.09	0	0	43	0	0	0	0	0	0	2019-02-14T01:00:00.000	1970-01-01T16:51:54.329	157	0	0	0	43	0	0	0	0	0	1	0.045	100	0	44	0	0	0
0	0	0	0	0	0	0	1	0	0	0	269.184	0	0	0	3.4	103.4	0	0	0	-0.09	0	0	43	0	0	0	0	0	0	2019-02-14T01:00:00.000	1970-01-01T16:51:54.329	157	0	0	0	43	0	0	0	0	0	1	0.045	100	0	44	0	0	0
0	0	0	0	0	0	0	1	0	0	0	269.184	0	0	0	3.4	103.4	0	0	0	-0.09	0	0	43	0	0	0	0	0	0	2019-02-14T01:00:00.000	1970-01-01T16:51:54.329	157	0	0	0	43	0	0	0	0	0	1	0.045	100	0	44	0	0	0
0	0	0	0	0	0	0	1	0	0	0	269.184	0	0	0	3.4	103.4	0	0	0	-0.09	0	0	43	0	0	0	0	0	0	2019-02-14T01:00:00.000	1970-01-01T16:51:54.329	157	0	0	0	43	0	0	0	0	0	1	0.045	100	0	44	0	0	0
0	0	0	0	0	0	0	1	0	0	0	269.184	0	0	0	3.4	103.4	0	0	0	-0.09	0	0	43	0	0	0	0	0	0	2019-02-14T01:00:00.000	1970-01-01T16:51:54.329	157	0	0	0	43	0	0	0	0	0	1	0.045	100	0	44	0	0	0
0	0	0	0	0	0	0	1	0	0	0	269.184	0	0	0	3.4	103.4	0	0	0	-0.085	0	0	43	0	0	0	0	0	0	2019-02-14T01:00:00.000	1970-01-01T16:51:54.439	157	0	0	0	43	0	0	0	0	0	1	0.037	100	0	44	0	0	0
0	0	0	0	0	0	0	1	0	0	0	269.184	0	0	0	3.4	103.4	0	0	0	-0.085	0	0	43	0	0	0	0	0	0	2019-02-14T01:00:00.000	1970-01-01T16:51:54.439	157	0	0	0	43	0	0	0	0	0	1	0.037	100	0	44	0	0	0
0	0	0	0	0	0	0	1	0	0	0	269.184	0	0	0	3.4	103.4	0	0	0	-0.085	0	0	43	0	0	0	0	0	0	2019-02-14T01:00:00.000	1970-01-01T16:51:54.439	157	0	0	0	43	0	0	0	0	0	1	0.037	100	0	44	0	0	0
0	0	0	0	0	0	0	1	0	0	0	269.184	0	0	0	3.4	103.4	0	0	0	-0.085	0	0	43	0	0	0	0	0	0	2019-02-14T01:00:00.000	1970-01-01T16:51:54.439	157	0	0	0	43	0	0	0	0	0	1	0.037	100	0	44	0	0	0
0	0	0	0	0	0	0	1	0	0	0	269.184	0	0	0	3.4	103.4	0	0	0	-0.085	0	0	43	0	0	0	0	0	0	2019-02-14T01:00:00.000	1970-01-01T16:51:54.439	157	0	0	0	43	0	0	0	0	0	1	0.037	100	0	44	0	0	0
0	0	0	0	0	0	0	1	0	0	0	269.184	0	0	0	3.4	103.4	0	0	0	-0.09	0	0	43	0	0	0	0	0	0	2019-02-14T01:00:00.000	1970-01-01T16:51:54.559	157	0	0	0	43	0	0	0	0	0	1	0.037	100	0	44	0	0	0
0	0	0	0	0	0	0	1	0	0	0	269.184	0	0	0	3.4	103.4	0	0	0	-0.09	0	0	43	0	0	0	0	0	0	2019-02-14T01:00:00.000	1970-01-01T16:51:54.559	157	0	0	0	43	0	0	0	0	0	1	0.037	100	0	44	0	0	0
0	0	0	0	0	0	0	1	0	0	0	269.184	0	0	0	3.4	103.4	0	0	0	-0.09	0	0	43	0	0	0	0	0	0	2019-02-14T01:00:00.000	1970-01-01T16:51:54.559	157	0	0	0	43	0	0	0	0	0	1	0.037	100	0	44	0	0	0
0	0	0	0	0	0	0	1	0	0	0	269.184	0	0	0	3.4	103.4	0	0	0	-0.09	0	0	43	0	0	0	0	0	0	2019-02-14T01:00:00.000	1970-01-01T16:51:54.559	157	0	0	0	43	0	0	0	0	0	1	0.037	100	0	44	0	0	0
0	0	0	0	0	0	0	1	0	0	0	269.184	0	0	0	3.4	103.4	0	0	0	-0.09	0	0	43	0	0	0	0	0	0	2019-02-14T01:00:00.000	1970-01-01T16:51:54.659	157	0	0	0	43	0	0	0	0	0	1	0.045	100	0	44	0	0	0
0	0	0	0	0	0	0	1	0	0	0	269.184	0	0	0	3.4	103.4	0	0	0	-0.09	0	0	43	0	0	0	0	0	0	2019-02-14T01:00:00.000	1970-01-01T16:51:54.659	157	0	0	0	43	0	0	0	0	0	1	0.045	100	0	44	0	0	0
0	0	0	0	0	0	0	1	0	0	0	269.184	0	0	0	3.4	103.4	0	0	0	-0.09	0	0	43	0	0	0	0	0	0	2019-02-14T01:00:00.000	1970-01-01T16:51:54.659	157	0	0	0	43	0	0	0	0	0	1	0.045	100	0	44	0	0	0
0	0	0	0	0	0	0	1	0	0	0	269.184	0	0	0	3.4	103.4	0	0	0	-0.09	0	0	43	0	0	0	0	0	0	2019-02-14T01:00:00.000	1970-01-01T16:51:54.659	157	0	0	0	43	0	0	0	0	0	1	0.045	100	0	44	0	0	0
0	0	0	0	0	0	0	1	0	0	0	269.184	0	0	0	3.4	103.4	0	0	0	-0.09	0	0	43	0	0	0	0	0	0	2019-02-14T01:00:00.000	1970-01-01T16:51:54.659	157	0	0	0	43	0	0	0	0	0	1	0.045	100	0	44	0	0	0
0	0	0	0	0	0	0	1	0	0	0	269.184	0	0	0	3.4	103.4	0	0	0	-0.08	0	0	43	0	0	0	0	0	0	2019-02-14T01:00:00.000	1970-01-01T16:51:54.779	157	0	0	0	43	0	0	0	0	0	1	0.045	100	0	44	0	0	0
0	0	0	0	0	0	0	1	0	0	0	269.184	0	0	0	3.4	103.4	0	0	0	-0.08	0	0	43	0	0	0	0	0	0	2019-02-14T01:00:00.000	1970-01-01T16:51:54.779	157	0	0	0	43	0	0	0	0	0	1	0.045	100	0	44	0	0	0
0	0	0	0	0	0	0	1	0	0	0	269.184	0	0	0	3.4	103.4	0	0	0	-0.08	0	0	43	0	0	0	0	0	0	2019-02-14T01:00:00.000	1970-01-01T16:51:54.779	157	0	0	0	43	0	0	0	0	0	1	0.045	100	0	44	0	0	0
0	0	0	0	0	0	0	1	0	0	0	269.184	0	0	0	3.4	103.4	0	0	0	-0.08	0	0	43	0	0	0	0	0	0	2019-02-14T01:00:00.000	1970-01-01T16:51:54.779	157	0	0	0	43	0	0	0	0	0	1	0.045	100	0	44	0	0	0
0	0	0	0	0	0	0	1	0	0	0	269.184	0	0	0	3.4	103.4	0	0	0	-0.08	0	0	43	0	0	0	0	0	0	2019-02-14T01:00:00.000	1970-01-01T16:51:54.779	157	0	0	0	43	0	0	0	0	0	1	0.045	100	0	44	0	0	0
0	0	0	0	0	0	0	1	0	0	0	269.184	0	0	0	3.4	103.4	0	0	0	-0.09	0	0	43	0	0	0	0	0	0	2019-02-14T01:00:00.000	1970-01-01T16:51:54.899	157	0	0	0	43	0	0	0	0	0	1	0.045	100	0	44	0	0	0
0	0	0	0	0	0	0	1	0	0	0	269.184	0	0	0	3.4	103.4	0	0	0	-0.09	0	0	43	0	0	0	0	0	0	2019-02-14T01:00:00.000	1970-01-01T16:51:54.899	157	0	0	0	43	0	0	0	0	0	1	0.045	100	0	44	0	0	0
0	0	0	0	0	0	0	1	0	0	0	269.184	0	0	0	3.4	103.4	0	0	0	-0.09	0	0	43	0	0	0	0	0	0	2019-02-14T01:00:00.000	1970-01-01T16:51:54.899	157	0	0	0	43	0	0	0	0	0	1	0.045	100	0	44	0	0	0
0	0	0	0	0	0	0	1	0	0	0	269.184	0	0	0	3.4	103.4	0	0	0	-0.09	0	0	43	0	0	0	0	0	0	2019-02-14T01:00:00.000	1970-01-01T16:51:54.899	157	0	0	0	43	0	0	0	0	0	1	0.045	100	0	44	0	0	0
0	0	0	0	0	0	0	1	0	0	0	269.184	0	0	0	3.4	103.4	0	0	0	-0.09	0	0	43	0	0	0	0	0	0	2019-02-14T01:00:00.000	1970-01-01T16:51:54.899	157	0	0	0	43	0	0	0	0	0	1	0.045	100	0	44	0	0	0
0	0	0	0	0	0	0	1	0	0	0	269.184	0	0	0	3.4	103.4	0	0	0	-0.08	0	0	43	0	0	0	0	0	0	2019-02-14T01:00:00.000	1970-01-01T16:51:55.019	157	0	0	0	43	0	0	0	0	0	1	0.045	100	0	44	0	0	0
0	0	0	0	0	0	0	1	0	0	0	269.184	0	0	0	3.4	103.4	0	0	0	-0.08	0	0	43	0	0	0	0	0	0	2019-02-14T01:00:00.000	1970-01-01T16:51:55.019	157	0	0	0	43	0	0	0	0	0	1	0.045	100	0	44	0	0	0
0	0	0	0	0	0	0	1	0	0	0	269.184	0	0	0	3.4	103.4	0	0	0	-0.08	0	0	43	0	0	0	0	0	0	2019-02-14T01:00:00.000	1970-01-01T16:51:55.019	157	0	0	0	43	0	0	0	0	0	1	0.045	100	0	44	0	0	0
0	0	0	0	0	0	0	1	0	0	0	269.184	0	0	0	3.4	103.4	0	0	0	-0.08	0	0	43	0	0	0	0	0	0	2019-02-14T01:00:00.000	1970-01-01T16:51:55.019	157	0	0	0	43	0	0	0	0	0	1	0.045	100	0	44	0	0	0
0	0	0	0	0	0	0	1	0	0	0	269.184	0	0	0	3.4	103.4	0	0	0	-0.08	0	0	43	0	0	0	0	0	0	2019-02-14T01:00:00.000	1970-01-01T16:51:55.019	157	0	0	0	43	0	0	0	0	0	1	0.045	100	0	44	0	0	0
0	0	0	0	0	0	0	1	0	0	0	269.184	0	0	0	3.4	103.4	0	0	0	-0.09	0	0	43	0	0	0	0	0	0	2019-02-14T01:00:00.000	1970-01-01T16:51:55.129	157	0	0	0	43	0	0	0	0	0	1	0.037	100	0	44	0	0	0
0	0	0	0	0	0	0	1	0	0	0	269.184	0	0	0	3.4	103.4	0	0	0	-0.09	0	0	43	0	0	0	0	0	0	2019-02-14T01:00:00.000	1970-01-01T16:51:55.129	157	0	0	0	43	0	0	0	0	0	1	0.037	100	0	44	0	0	0
0	0	0	0	0	0	0	1	0	0	0	269.184	0	0	0	3.4	103.4	0	0	0	-0.09	0	0	43	0	0	0	0	0	0	2019-02-14T01:00:00.000	1970-01-01T16:51:55.129	157	0	0	0	43	0	0	0	0	0	1	0.037	100	0	44	0	0	0
0	0	0	0	0	0	0	1	0	0	0	269.184	0	0	0	3.4	103.4	0	0	0	-0.09	0	0	43	0	0	0	0	0	0	2019-02-14T01:00:00.000	1970-01-01T16:51:55.129	157	0	0	0	43	0	0	0	0	0	1	0.037	100	0	44	0	0	0
0	0	0	0	0	0	0	1	0	0	0	269.184	0	0	0	3.4	103.4	0	0	0	-0.09	0	0	43	0	0	0	0	0	0	2019-02-14T01:00:00.000	1970-01-01T16:51:55.129	157	0	0	0	43	0	0	0	0	0	1	0.037	100	0	44	0	0	0
0	0	0	0	0	0	0	1	0	0	0	269.184	0	0	0	3.4	103.4	0	0	0	-0.08	0	0	43	0	0	0	0	0	0	2019-02-14T01:00:00.000	1970-01-01T16:51:55.249	157	0	0	0	43	0	0	0	0	0	1	0.037	100	0	44	0	0	0
0	0	0	0	0	0	0	1	0	0	0	269.184	0	0	0	3.4	103.4	0	0	0	-0.08	0	0	43	0	0	0	0	0	0	2019-02-14T01:00:00.000	1970-01-01T16:51:55.249	157	0	0	0	43	0	0	0	0	0	1	0.037	100	0	44	0	0	0
0	0	0	0	0	0	0	1	0	0	0	269.184	0	0	0	3.4	103.4	0	0	0	-0.08	0	0	43	0	0	0	0	0	0	2019-02-14T01:00:00.000	1970-01-01T16:51:55.249	157	0	0	0	43	0	0	0	0	0	1	0.037	100	0	44	0	0	0
0	0	0	0	0	0	0	1	0	0	0	269.184	0	0	0	3.4	103.4	0	0	0	-0.08	0	0	43	0	0	0	0	0	0	2019-02-14T01:00:00.000	1970-01-01T16:51:55.249	157	0	0	0	43	0	0	0	0	0	1	0.037	100	0	44	0	0	0
0	0	0	0	0	0	0	1	0	0	0	269.184	0	0	0	3.4	103.4	0	0	0	-0.08	0	0	43	0	0	0	0	0	0	2019-02-14T01:00:00.000	1970-01-01T16:51:55.249	157	0	0	0	43	0	0	0	0	0	1	0.037	100	0	44	0	0	0
0	0	0	0	0	0	0	1	0	0	0	269.184	0	0	0	3.4	103.4	0	0	0	-0.09	0	0	43	0	0	0	0	0	0	2019-02-14T01:00:00.000	1970-01-01T16:51:55.369	157	0	0	0	43	0	0	0	0	0	1	0.03	100	0	44	0	0	0
0	0	0	0	0	0	0	1	0	0	0	269.184	0	0	0	3.4	103.4	0	0	0	-0.09	0	0	43	0	0	0	0	0	0	2019-02-14T01:00:00.000	1970-01-01T16:51:55.369	157	0	0	0	43	0	0	0	0	0	1	0.03	100	0	44	0	0	0
0	0	0	0	0	0	0	1	0	0	0	269.184	0	0	0	3.4	103.4	0	0	0	-0.09	0	0	43	0	0	0	0	0	0	2019-02-14T01:00:00.000	1970-01-01T16:51:55.369	157	0	0	0	43	0	0	0	0	0	1	0.03	100	0	44	0	0	0
0	0	0	0	0	0	0	1	0	0	0	269.184	0	0	0	3.4	103.4	0	0	0	-0.08	0	0	43	0	0	0	0	0	0	2019-02-14T01:00:00.000	1970-01-01T16:51:55.639	157	0	0	0	43	0	0	0	0	0	1	0.045	100	0	44	0	0	0
0	0	0	0	0	0	0	1	0	0	0	269.184	0	0	0	3.4	103.4	0	0	0	-0.08	0	0	43	0	0	0	0	0	0	2019-02-14T01:00:00.000	1970-01-01T16:51:55.639	157	0	0	0	43	0	0	0	0	0	1	0.045	100	0	44	0	0	0
0	0	0	0	0	0	0	1	0	0	0	269.184	0	0	0	3.4	103.4	0	0	0	-0.08	0	0	43	0	0	0	0	0	0	2019-02-14T01:00:00.000	1970-01-01T16:51:55.639	157	0	0	0	43	0	0	0	0	0	1	0.045	100	0	44	0	0	0
0	0	0	0	0	0	0	1	0	0	0	269.184	0	0	0	3.4	103.4	0	0	0	-0.08	0	0	43	0	0	0	0	0	0	2019-02-14T01:00:00.000	1970-01-01T16:51:55.639	157	0	0	0	43	0	0	0	0	0	1	0.045	100	0	44	0	0	0
0	0	0	0	0	0	0	1	0	0	0	269.184	0	0	0	3.4	103.4	0	0	0	-0.08	0	0	43	0	0	0	0	0	0	2019-02-14T01:00:00.000	1970-01-01T16:51:55.639	157	0	0	0	43	0	0	0	0	0	1	0.045	100	0	44	0	0	0
0	0	0	0	0	0	0	1	0	0	0	269.184	0	0	0	3.4	103.4	0	0	0	-0.075	0	0	43	0	0	0	0	0	0	2019-02-14T01:00:00.000	1970-01-01T16:51:55.759	157	0	0	0	43	0	0	0	0	0	1	0.045	100	0	44	0	0	0
0	0	0	0	0	0	0	1	0	0	0	269.184	0	0	0	3.4	103.4	0	0	0	-0.075	0	0	43	0	0	0	0	0	0	2019-02-14T01:00:00.000	1970-01-01T16:51:55.759	157	0	0	0	43	0	0	0	0	0	1	0.045	100	0	44	0	0	0
0	0	0	0	0	0	0	1	0	0	0	269.184	0	0	0	3.4	103.4	0	0	0	-0.075	0	0	43	0	0	0	0	0	0	2019-02-14T01:00:00.000	1970-01-01T16:51:55.759	157	0	0	0	43	0	0	0	0	0	1	0.045	100	0	44	0	0	0
0	0	0	0	0	0	0	1	0	0	0	269.184	0	0	0	3.4	103.4	0	0	0	-0.075	0	0	43	0	0	0	0	0	0	2019-02-14T01:00:00.000	1970-01-01T16:51:55.759	157	0	0	0	43	0	0	0	0	0	1	0.045	100	0	44	0	0	0
0	0	0	0	0	0	0	1	0	0	0	269.184	0	0	0	3.4	103.4	0	0	0	-0.075	0	0	43	0	0	0	0	0	0	2019-02-14T01:00:00.000	1970-01-01T16:51:55.759	157	0	0	0	43	0	0	0	0	0	1	0.045	100	0	44	0	0	0
0	0	0	0	0	0	0	1	0	0	0	269.184	0	0	0	3.4	103.4	0	0	0	-0.075	0	0	43	0	0	0	0	0	0	2019-02-14T01:00:00.000	1970-01-01T16:51:55.869	157	0	0	0	43	0	0	0	0	0	1	0.045	100	0	44	0	0	0
0	0	0	0	0	0	0	1	0	0	0	269.184	0	0	0	3.4	103.4	0	0	0	-0.075	0	0	43	0	0	0	0	0	0	2019-02-14T01:00:00.000	1970-01-01T16:51:55.869	157	0	0	0	43	0	0	0	0	0	1	0.045	100	0	44	0	0	0
0	0	0	0	0	0	0	1	0	0	0	269.184	0	0	0	3.4	103.4	0	0	0	-0.075	0	0	43	0	0	0	0	0	0	2019-02-14T01:00:00.000	1970-01-01T16:51:55.869	157	0	0	0	43	0	0	0	0	0	1	0.045	100	0	44	0	0	0
0	0	0	0	0	0	0	1	0	0	0	269.184	0	0	0	3.4	103.4	0	0	0	-0.075	0	0	43	0	0	0	0	0	0	2019-02-14T01:00:00.000	1970-01-01T16:51:55.869	157	0	0	0	43	0	0	0	0	0	1	0.045	100	0	44	0	0	0
0	0	0	0	0	0	0	1	0	0	0	269.184	0	0	0	3.4	103.4	0	0	0	-0.075	0	0	43	0	0	0	0	0	0	2019-02-14T01:00:00.000	1970-01-01T16:51:55.869	157	0	0	0	43	0	0	0	0	0	1	0.045	100	0	44	0	0	0
0	0	0	0	0	0	0	1	0	0	0	269.184	0	0	0	3.4	103.4	0	0	0	-0.08	0	0	43	0	0	0	0	0	0	2019-02-14T01:00:00.000	1970-01-01T16:51:55.989	157	0	0	0	43	0	0	0	0	0	1	0.037	100	0	44	0	0	0
0	0	0	0	0	0	0	1	0	0	0	269.184	0	0	0	3.4	103.4	0	0	0	-0.08	0	0	43	0	0	0	0	0	0	2019-02-14T01:00:00.000	1970-01-01T16:51:55.989	157	0	0	0	43	0	0	0	0	0	1	0.037	100	0	44	0	0	0
0	0	0	0	0	0	0	1	0	0	0	269.184	0	0	0	3.4	103.4	0	0	0	-0.08	0	0	43	0	0	0	0	0	0	2019-02-14T01:00:00.000	1970-01-01T16:51:55.989	157	0	0	0	43	0	0	0	0	0	1	0.037	100	0	44	0	0	0
0	0	0	0	0	0	0	1	0	0	0	269.184	0	0	0	3.4	103.4	0	0	0	-0.08	0	0	43	0	0	0	0	0	0	2019-02-14T01:00:00.000	1970-01-01T16:51:55.989	157	0	0	0	43	0	0	0	0	0	1	0.037	100	0	44	0	0	0
0	0	0	0	0	0	0	1	0	0	0	269.184	0	0	0	3.4	103.4	0	0	0	-0.08	0	0	43	0	0	0	0	0	0	2019-02-14T01:00:00.000	1970-01-01T16:51:55.989	157	0	0	0	43	0	0	0	0	0	1	0.037	100	0	44	0	0	0
0	0	0	0	0	0	0	1	0	0	0	269.184	0	0	0	3.4	103.4	0	0	0	-0.08	0	0	43	0	0	0	0	0	0	2019-02-14T01:00:00.000	1970-01-01T16:51:56.109	157	0	0	0	43	0	0	0	0	0	1	0.037	100	0	44	0	0	0
0	0	0	0	0	0	0	1	0	0	0	269.184	0	0	0	3.4	103.4	0	0	0	-0.08	0	0	43	0	0	0	0	0	0	2019-02-14T01:00:00.000	1970-01-01T16:51:56.109	157	0	0	0	43	0	0	0	0	0	1	0.037	100	0	44	0	0	0
0	0	0	0	0	0	0	1	0	0	0	269.184	0	0	0	3.4	103.4	0	0	0	-0.08	0	0	43	0	0	0	0	0	0	2019-02-14T01:00:00.000	1970-01-01T16:51:56.109	157	0	0	0	43	0	0	0	0	0	1	0.037	100	0	44	0	0	0
0	0	0	0	0	0	0	1	0	0	0	269.184	0	0	0	3.4	103.4	0	0	0	-0.08	0	0	43	0	0	0	0	0	0	2019-02-14T01:00:00.000	1970-01-01T16:51:56.109	157	0	0	0	43	0	0	0	0	0	1	0.037	100	0	44	0	0	0
0	0	0	0	0	0	0	1	0	0	0	269.184	0	0	0	3.4	103.4	0	0	0	-0.08	0	0	43	0	0	0	0	0	0	2019-02-14T01:00:00.000	1970-01-01T16:51:56.109	157	0	0	0	43	0	0	0	0	0	1	0.037	100	0	44	0	0	0
0	0	0	0	0	0	0	1	0	0	0	269.184	0	0	0	3.4	103.4	0	0	0	-0.085	0	0	43	0	0	0	0	0	0	2019-02-14T01:00:00.000	1970-01-01T16:51:56.469	157	0	0	0	43	0	0	0	0	0	1	0.06	100	0	44	0	0	0
0	0	0	0	0	0	0	1	0	0	0	269.184	0	0	0	3.4	103.4	0	0	0	-0.08	0	0	43	0	0	0	0	0	0	2019-02-14T01:00:00.000	1970-01-01T16:51:56.699	157	0	0	0	43	0	0	0	0	0	1	0.045	100	0	44	0	0	0
0	0	0	0	0	0	0	1	0	0	0	269.184	0	0	0	3.4	103.4	0	0	0	-0.08	0	0	43	0	0	0	0	0	0	2019-02-14T01:00:00.000	1970-01-01T16:51:56.699	157	0	0	0	43	0	0	0	0	0	1	0.045	100	0	44	0	0	0
0	0	0	0	0	0	0	1	0	0	0	269.184	0	0	0	3.4	103.4	0	0	0	-0.08	0	0	43	0	0	0	0	0	0	2019-02-14T01:00:00.000	1970-01-01T16:51:56.699	157	0	0	0	43	0	0	0	0	0	1	0.045	100	0	44	0	0	0
0	0	0	0	0	0	0	1	0	0	0	269.184	0	0	0	3.4	103.4	0	0	0	-0.08	0	0	43	0	0	0	0	0	0	2019-02-14T01:00:00.000	1970-01-01T16:51:56.699	157	0	0	0	43	0	0	0	0	0	1	0.045	100	0	44	0	0	0
0	0	0	0	0	0	0	1	0	0	0	269.184	0	0	0	3.4	103.4	0	0	0	-0.08	0	0	43	0	0	0	0	0	0	2019-02-14T01:00:00.000	1970-01-01T16:51:56.699	157	0	0	0	43	0	0	0	0	0	1	0.045	100	0	44	0	0	0
0	0	0	0	0	0	0	1	0	0	0	269.184	0	0	0	3.4	103.4	0	0	0	-0.075	0	0	43	0	0	0	0	0	0	2019-02-14T01:00:00.000	1970-01-01T16:51:56.809	157	0	0	0	43	0	0	0	0	0	1	0.037	100	0	44	0	0	0
0	0	0	0	0	0	0	1	0	0	0	269.184	0	0	0	3.4	103.4	0	0	0	-0.075	0	0	43	0	0	0	0	0	0	2019-02-14T01:00:00.000	1970-01-01T16:51:56.809	157	0	0	0	43	0	0	0	0	0	1	0.037	100	0	44	0	0	0
0	0	0	0	0	0	0	1	0	0	0	269.184	0	0	0	3.4	103.4	0	0	0	-0.075	0	0	43	0	0	0	0	0	0	2019-02-14T01:00:00.000	1970-01-01T16:51:56.809	157	0	0	0	43	0	0	0	0	0	1	0.037	100	0	44	0	0	0
0	0	0	0	0	0	0	1	0	0	0	269.184	0	0	0	3.4	103.4	0	0	0	-0.075	0	0	43	0	0	0	0	0	0	2019-02-14T01:00:00.000	1970-01-01T16:51:56.809	157	0	0	0	43	0	0	0	0	0	1	0.037	100	0	44	0	0	0
0	0	0	0	0	0	0	1	0	0	0	269.184	0	0	0	3.4	103.4	0	0	0	-0.075	0	0	43	0	0	0	0	0	0	2019-02-14T01:00:00.000	1970-01-01T16:51:56.809	157	0	0	0	43	0	0	0	0	0	1	0.037	100	0	44	0	0	0
0	0	0	0	0	0	0	1	0	0	0	269.184	0	0	0	3.4	103.4	0	0	0	-0.095	0	0	43	0	0	0	0	0	0	2019-02-14T01:00:00.000	1970-01-01T16:51:56.929	157	0	0	0	43	0	0	0	0	0	1	0.045	100	0	44	0	0	0
0	0	0	0	0	0	0	1	0	0	0	269.184	0	0	0	3.4	103.4	0	0	0	-0.095	0	0	43	0	0	0	0	0	0	2019-02-14T01:00:00.000	1970-01-01T16:51:56.929	157	0	0	0	43	0	0	0	0	0	1	0.045	100	0	44	0	0	0
0	0	0	0	0	0	0	1	0	0	0	269.184	0	0	0	3.4	103.4	0	0	0	-0.095	0	0	43	0	0	0	0	0	0	2019-02-14T01:00:00.000	1970-01-01T16:51:56.929	157	0	0	0	43	0	0	0	0	0	1	0.045	100	0	44	0	0	0
0	0	0	0	0	0	0	1	0	0	0	269.184	0	0	0	3.4	103.4	0	0	0	-0.095	0	0	43	0	0	0	0	0	0	2019-02-14T01:00:00.000	1970-01-01T16:51:56.929	157	0	0	0	43	0	0	0	0	0	1	0.045	100	0	44	0	0	0
0	0	0	0	0	0	0	1	0	0	0	269.184	0	0	0	3.4	103.4	0	0	0	-0.095	0	0	43	0	0	0	0	0	0	2019-02-14T01:00:00.000	1970-01-01T16:51:56.929	157	0	0	0	43	0	0	0	0	0	1	0.045	100	0	44	0	0	0
0	0	0	0	0	0	0	1	0	0	0	269.184	0	0	0	3.4	103.4	0	0	0	-0.095	0	0	43	0	0	0	0	0	0	2019-02-14T01:00:00.000	1970-01-01T16:51:57.049	157	0	0	0	43	0	0	0	0	0	1	0.037	100	0	44	0	0	0
0	0	0	0	0	0	0	1	0	0	0	269.184	0	0	0	3.4	103.4	0	0	0	-0.095	0	0	43	0	0	0	0	0	0	2019-02-14T01:00:00.000	1970-01-01T16:51:57.049	157	0	0	0	43	0	0	0	0	0	1	0.037	100	0	44	0	0	0
0	0	0	0	0	0	0	1	0	0	0	269.184	0	0	0	3.4	103.4	0	0	0	-0.095	0	0	43	0	0	0	0	0	0	2019-02-14T01:00:00.000	1970-01-01T16:51:57.049	157	0	0	0	43	0	0	0	0	0	1	0.037	100	0	44	0	0	0
0	0	0	0	0	0	0	1	0	0	0	269.184	0	0	0	3.4	103.4	0	0	0	-0.095	0	0	43	0	0	0	0	0	0	2019-02-14T01:00:00.000	1970-01-01T16:51:57.049	157	0	0	0	43	0	0	0	0	0	1	0.037	100	0	44	0	0	0
0	0	0	0	0	0	0	1	0	0	0	269.184	0	0	0	3.4	103.4	0	0	0	-0.095	0	0	43	0	0	0	0	0	0	2019-02-14T01:00:00.000	1970-01-01T16:51:57.049	157	0	0	0	43	0	0	0	0	0	1	0.037	100	0	44	0	0	0
0	0	0	0	0	0	0	1	0	0	0	269.184	0	0	0	3.4	103.4	0	0	0	-0.09	0	0	43	0	0	0	0	0	0	2019-02-14T01:00:00.000	1970-01-01T16:51:57.159	157	0	0	0	43	0	0	0	0	0	1	0.045	100	0	44	0	0	0
0	0	0	0	0	0	0	1	0	0	0	269.184	0	0	0	3.4	103.4	0	0	0	-0.09	0	0	43	0	0	0	0	0	0	2019-02-14T01:00:00.000	1970-01-01T16:51:57.159	157	0	0	0	43	0	0	0	0	0	1	0.045	100	0	44	0	0	0
0	0	0	0	0	0	0	1	0	0	0	269.184	0	0	0	3.4	103.4	0	0	0	-0.09	0	0	43	0	0	0	0	0	0	2019-02-14T01:00:00.000	1970-01-01T16:51:57.159	157	0	0	0	43	0	0	0	0	0	1	0.045	100	0	44	0	0	0
0	0	0	0	0	0	0	1	0	0	0	269.184	0	0	0	3.4	103.4	0	0	0	-0.09	0	0	43	0	0	0	0	0	0	2019-02-14T01:00:00.000	1970-01-01T16:51:57.159	157	0	0	0	43	0	0	0	0	0	1	0.045	100	0	44	0	0	0
0	0	0	0	0	0	0	1	0	0	0	269.184	0	0	0	3.4	103.4	0	0	0	-0.09	0	0	43	0	0	0	0	0	0	2019-02-14T01:00:00.000	1970-01-01T16:51:57.159	157	0	0	0	43	0	0	0	0	0	1	0.045	100	0	44	0	0	0
0	0	0	0	0	0	0	1	0	0	0	269.184	0	0	0	3.4	103.4	0	0	0	-0.085	0	0	43	0	0	0	0	0	0	2019-02-14T01:00:00.000	1970-01-01T16:51:57.289	157	0	0	0	43	0	0	0	0	0	1	0.037	100	0	44	0	0	0
0	0	0	0	0	0	0	1	0	0	0	269.184	0	0	0	3.4	103.4	0	0	0	-0.085	0	0	43	0	0	0	0	0	0	2019-02-14T01:00:00.000	1970-01-01T16:51:57.289	157	0	0	0	43	0	0	0	0	0	1	0.037	100	0	44	0	0	0
0	0	0	0	0	0	0	1	0	0	0	269.184	0	0	0	3.4	103.4	0	0	0	-0.085	0	0	43	0	0	0	0	0	0	2019-02-14T01:00:00.000	1970-01-01T16:51:57.289	157	0	0	0	43	0	0	0	0	0	1	0.037	100	0	44	0	0	0
0	0	0	0	0	0	0	1	0	0	0	269.184	0	0	0	3.4	103.4	0	0	0	-0.085	0	0	43	0	0	0	0	0	0	2019-02-14T01:00:00.000	1970-01-01T16:51:57.289	157	0	0	0	43	0	0	0	0	0	1	0.037	100	0	44	0	0	0
0	0	0	0	0	0	0	1	0	0	0	269.184	0	0	0	3.4	103.4	0	0	0	-0.085	0	0	43	0	0	0	0	0	0	2019-02-14T01:00:00.000	1970-01-01T16:51:57.289	157	0	0	0	43	0	0	0	0	0	1	0.037	100	0	44	0	0	0
0	0	0	0	0	0	0	1	0	0	0	269.184	0	0	0	3.4	103.4	0	0	0	-0.085	0	0	43	0	0	0	0	0	0	2019-02-14T01:00:00.000	1970-01-01T16:51:57.399	157	0	0	0	43	0	0	0	0	0	1	0.045	100	0	44	0	0	0
0	0	0	0	0	0	0	1	0	0	0	269.184	0	0	0	3.4	103.4	0	0	0	-0.085	0	0	43	0	0	0	0	0	0	2019-02-14T01:00:00.000	1970-01-01T16:51:57.399	157	0	0	0	43	0	0	0	0	0	1	0.045	100	0	44	0	0	0
0	0	0	0	0	0	0	1	0	0	0	269.184	0	0	0	3.4	103.4	0	0	0	-0.085	0	0	43	0	0	0	0	0	0	2019-02-14T01:00:00.000	1970-01-01T16:51:57.399	157	0	0	0	43	0	0	0	0	0	1	0.045	100	0	44	0	0	0
0	0	0	0	0	0	0	1	0	0	0	269.184	0	0	0	3.4	103.4	0	0	0	-0.085	0	0	43	0	0	0	0	0	0	2019-02-14T01:00:00.000	1970-01-01T16:51:57.399	157	0	0	0	43	0	0	0	0	0	1	0.045	100	0	44	0	0	0
0	0	0	0	0	0	0	1	0	0	0	269.184	0	0	0	3.4	103.4	0	0	0	-0.085	0	0	43	0	0	0	0	0	0	2019-02-14T01:00:00.000	1970-01-01T16:51:57.399	157	0	0	0	43	0	0	0	0	0	1	0.045	100	0	44	0	0	0
0	0	0	0	0	0	0	1	0	0	0	269.184	0	0	0	3.4	103.4	0	0	0	-0.08	0	0	43	0	0	0	0	0	0	2019-02-14T01:00:00.000	1970-01-01T16:51:57.519	157	0	0	0	43	0	0	0	0	0	1	0.045	100	0	44	0	0	0
0	0	0	0	0	0	0	1	0	0	0	269.184	0	0	0	3.4	103.4	0	0	0	-0.08	0	0	43	0	0	0	0	0	0	2019-02-14T01:00:00.000	1970-01-01T16:51:57.519	157	0	0	0	43	0	0	0	0	0	1	0.045	100	0	44	0	0	0
0	0	0	0	0	0	0	1	0	0	0	269.184	0	0	0	3.4	103.4	0	0	0	-0.08	0	0	43	0	0	0	0	0	0	2019-02-14T01:00:00.000	1970-01-01T16:51:57.519	157	0	0	0	43	0	0	0	0	0	1	0.045	100	0	44	0	0	0
0	0	0	0	0	0	0	1	0	0	0	269.184	0	0	0	3.4	103.4	0	0	0	-0.08	0	0	43	0	0	0	0	0	0	2019-02-14T01:00:00.000	1970-01-01T16:51:57.519	157	0	0	0	43	0	0	0	0	0	1	0.045	100	0	44	0	0	0
0	0	0	0	0	0	0	1	0	0	0	269.184	0	0	0	3.4	103.4	0	0	0	-0.08	0	0	43	0	0	0	0	0	0	2019-02-14T01:00:00.000	1970-01-01T16:51:57.519	157	0	0	0	43	0	0	0	0	0	1	0.045	100	0	44	0	0	0
0	0	0	0	0	0	0	1	0	0	0	269.184	0	0	0	3.4	103.4	0	0	0	-0.09	0	0	43	0	0	0	0	0	0	2019-02-14T01:00:00.000	1970-01-01T16:51:57.629	157	0	0	0	43	0	0	0	0	0	1	0.045	100	0	44	0	0	0
0	0	0	0	0	0	0	1	0	0	0	269.184	0	0	0	3.4	103.4	0	0	0	-0.09	0	0	43	0	0	0	0	0	0	2019-02-14T01:00:00.000	1970-01-01T16:51:57.629	157	0	0	0	43	0	0	0	0	0	1	0.045	100	0	44	0	0	0
0	0	0	0	0	0	0	1	0	0	0	269.184	0	0	0	3.4	103.4	0	0	0	-0.09	0	0	43	0	0	0	0	0	0	2019-02-14T01:00:00.000	1970-01-01T16:51:57.629	157	0	0	0	43	0	0	0	0	0	1	0.045	100	0	44	0	0	0
0	0	0	0	0	0	0	1	0	0	0	269.184	0	0	0	3.4	103.4	0	0	0	-0.09	0	0	43	0	0	0	0	0	0	2019-02-14T01:00:00.000	1970-01-01T16:51:57.629	157	0	0	0	43	0	0	0	0	0	1	0.045	100	0	44	0	0	0
0	0	0	0	0	0	0	1	0	0	0	269.184	0	0	0	3.4	103.4	0	0	0	-0.09	0	0	43	0	0	0	0	0	0	2019-02-14T01:00:00.000	1970-01-01T16:51:57.629	157	0	0	0	43	0	0	0	0	0	1	0.045	100	0	44	0	0	0
0	0	0	0	0	0	0	1	0	0	0	269.184	0	0	0	3.4	103.4	0	0	0	-0.09	0	0	43	0	0	0	0	0	0	2019-02-14T01:00:00.000	1970-01-01T16:51:57.749	157	0	0	0	43	0	0	0	0	0	1	0.045	100	0	44	0	0	0
0	0	0	0	0	0	0	1	0	0	0	269.184	0	0	0	3.4	103.4	0	0	0	-0.09	0	0	43	0	0	0	0	0	0	2019-02-14T01:00:00.000	1970-01-01T16:51:57.749	157	0	0	0	43	0	0	0	0	0	1	0.045	100	0	44	0	0	0
0	0	0	0	0	0	0	1	0	0	0	269.184	0	0	0	3.4	103.4	0	0	0	-0.09	0	0	43	0	0	0	0	0	0	2019-02-14T01:00:00.000	1970-01-01T16:51:57.749	157	0	0	0	43	0	0	0	0	0	1	0.045	100	0	44	0	0	0
0	0	0	0	0	0	0	1	0	0	0	269.184	0	0	0	3.4	103.4	0	0	0	-0.09	0	0	43	0	0	0	0	0	0	2019-02-14T01:00:00.000	1970-01-01T16:51:57.749	157	0	0	0	43	0	0	0	0	0	1	0.045	100	0	44	0	0	0
0	0	0	0	0	0	0	1	0	0	0	269.184	0	0	0	3.4	103.4	0	0	0	-0.09	0	0	43	0	0	0	0	0	0	2019-02-14T01:00:00.000	1970-01-01T16:51:57.749	157	0	0	0	43	0	0	0	0	0	1	0.045	100	0	44	0	0	0
0	0	0	0	0	0	0	1	0	0	0	269.184	0	0	0	3.4	103.4	0	0	0	-0.08	0	0	43	0	0	0	0	0	0	2019-02-14T01:00:00.000	1970-01-01T16:51:57.869	157	0	0	0	43	0	0	0	0	0	1	0.045	100	0	44	0	0	0
0	0	0	0	0	0	0	1	0	0	0	269.184	0	0	0	3.4	103.4	0	0	0	-0.08	0	0	43	0	0	0	0	0	0	2019-02-14T01:00:00.000	1970-01-01T16:51:57.869	157	0	0	0	43	0	0	0	0	0	1	0.045	100	0	44	0	0	0
0	0	0	0	0	0	0	1	0	0	0	269.184	0	0	0	3.4	103.4	0	0	0	-0.08	0	0	43	0	0	0	0	0	0	2019-02-14T01:00:00.000	1970-01-01T16:51:57.869	157	0	0	0	43	0	0	0	0	0	1	0.045	100	0	44	0	0	0
0	0	0	0	0	0	0	1	0	0	0	269.184	0	0	0	3.4	103.4	0	0	0	-0.08	0	0	43	0	0	0	0	0	0	2019-02-14T01:00:00.000	1970-01-01T16:51:57.869	157	0	0	0	43	0	0	0	0	0	1	0.045	100	0	44	0	0	0
0	0	0	0	0	0	0	1	0	0	0	269.184	0	0	0	3.4	103.4	0	0	0	-0.08	0	0	43	0	0	0	0	0	0	2019-02-14T01:00:00.000	1970-01-01T16:51:57.869	157	0	0	0	43	0	0	0	0	0	1	0.045	100	0	44	0	0	0
0	0	0	0	0	0	0	1	0	0	0	269.184	0	0	0	3.4	103.4	0	0	0	-0.09	0	0	43	0	0	0	0	0	0	2019-02-14T01:00:00.000	1970-01-01T16:51:57.989	157	0	0	0	43	0	0	0	0	0	1	0.037	100	0	44	0	0	0
0	0	0	0	0	0	0	1	0	0	0	269.184	0	0	0	3.4	103.4	0	0	0	-0.09	0	0	43	0	0	0	0	0	0	2019-02-14T01:00:00.000	1970-01-01T16:51:57.989	157	0	0	0	43	0	0	0	0	0	1	0.037	100	0	44	0	0	0
0	0	0	0	0	0	0	1	0	0	0	269.184	0	0	0	3.4	103.4	0	0	0	-0.09	0	0	43	0	0	0	0	0	0	2019-02-14T01:00:00.000	1970-01-01T16:51:57.989	157	0	0	0	43	0	0	0	0	0	1	0.037	100	0	44	0	0	0
0	0	0	0	0	0	0	1	0	0	0	269.184	0	0	0	3.4	103.4	0	0	0	-0.09	0	0	43	0	0	0	0	0	0	2019-02-14T01:00:00.000	1970-01-01T16:51:57.989	157	0	0	0	43	0	0	0	0	0	1	0.037	100	0	44	0	0	0
0	0	0	0	0	0	0	1	0	0	0	269.184	0	0	0	3.4	103.4	0	0	0	-0.09	0	0	43	0	0	0	0	0	0	2019-02-14T01:00:00.000	1970-01-01T16:51:57.989	157	0	0	0	43	0	0	0	0	0	1	0.037	100	0	44	0	0	0
0	0	0	0	0	0	0	1	0	0	0	269.184	0	0	0	3.4	103.4	0	0	0	-0.1	0	0	43	0	0	0	0	0	0	2019-02-14T01:00:00.000	1970-01-01T16:51:58.109	157	0	0	0	43	0	0	0	0	0	1	0.037	100	0	44	0	0	0
0	0	0	0	0	0	0	1	0	0	0	269.184	0	0	0	3.4	103.4	0	0	0	-0.1	0	0	43	0	0	0	0	0	0	2019-02-14T01:00:00.000	1970-01-01T16:51:58.109	157	0	0	0	43	0	0	0	0	0	1	0.037	100	0	44	0	0	0
0	0	0	0	0	0	0	1	0	0	0	269.184	0	0	0	3.4	103.4	0	0	0	-0.1	0	0	43	0	0	0	0	0	0	2019-02-14T01:00:00.000	1970-01-01T16:51:58.109	157	0	0	0	43	0	0	0	0	0	1	0.037	100	0	44	0	0	0
0	0	0	0	0	0	0	1	0	0	0	269.184	0	0	0	3.4	103.4	0	0	0	-0.1	0	0	43	0	0	0	0	0	0	2019-02-14T01:00:00.000	1970-01-01T16:51:58.109	157	0	0	0	43	0	0	0	0	0	1	0.037	100	0	44	0	0	0
0	0	0	0	0	0	0	1	0	0	0	269.184	0	0	0	3.4	103.4	0	0	0	-0.1	0	0	43	0	0	0	0	0	0	2019-02-14T01:00:00.000	1970-01-01T16:51:58.109	157	0	0	0	43	0	0	0	0	0	1	0.037	100	0	44	0	0	0
0	0	0	0	0	0	0	1	0	0	0	269.184	0	0	0	3.4	103.4	0	0	0	-0.085	0	0	43	0	0	0	0	0	0	2019-02-14T01:00:00.000	1970-01-01T16:51:58.219	157	0	0	0	43	0	0	0	0	0	1	0.037	100	0	44	0	0	0
0	0	0	0	0	0	0	1	0	0	0	269.184	0	0	0	3.4	103.4	0	0	0	-0.085	0	0	43	0	0	0	0	0	0	2019-02-14T01:00:00.000	1970-01-01T16:51:58.219	157	0	0	0	43	0	0	0	0	0	1	0.037	100	0	44	0	0	0
0	0	0	0	0	0	0	1	0	0	0	269.184	0	0	0	3.4	103.4	0	0	0	-0.085	0	0	43	0	0	0	0	0	0	2019-02-14T01:00:00.000	1970-01-01T16:51:58.219	157	0	0	0	43	0	0	0	0	0	1	0.037	100	0	44	0	0	0
0	0	0	0	0	0	0	1	0	0	0	269.184	0	0	0	3.4	103.4	0	0	0	-0.085	0	0	43	0	0	0	0	0	0	2019-02-14T01:00:00.000	1970-01-01T16:51:58.219	157	0	0	0	43	0	0	0	0	0	1	0.037	100	0	44	0	0	0
0	0	0	0	0	0	0	1	0	0	0	269.184	0	0	0	3.4	103.4	0	0	0	-0.085	0	0	43	0	0	0	0	0	0	2019-02-14T01:00:00.000	1970-01-01T16:51:58.219	157	0	0	0	43	0	0	0	0	0	1	0.037	100	0	44	0	0	0
0	0	0	0	0	0	0	1	0	0	0	269.184	0	0	0	3.4	103.4	0	0	0	-0.095	0	0	43	0	0	0	0	0	0	2019-02-14T01:00:00.000	1970-01-01T16:51:58.339	157	0	0	0	43	0	0	0	0	0	1	0.045	100	0	44	0	0	0
0	0	0	0	0	0	0	1	0	0	0	269.184	0	0	0	3.4	103.4	0	0	0	-0.095	0	0	43	0	0	0	0	0	0	2019-02-14T01:00:00.000	1970-01-01T16:51:58.339	157	0	0	0	43	0	0	0	0	0	1	0.045	100	0	44	0	0	0
0	0	0	0	0	0	0	1	0	0	0	269.184	0	0	0	3.4	103.4	0	0	0	-0.095	0	0	43	0	0	0	0	0	0	2019-02-14T01:00:00.000	1970-01-01T16:51:58.339	157	0	0	0	43	0	0	0	0	0	1	0.045	100	0	44	0	0	0
0	0	0	0	0	0	0	1	0	0	0	269.184	0	0	0	3.4	103.4	0	0	0	-0.095	0	0	43	0	0	0	0	0	0	2019-02-14T01:00:00.000	1970-01-01T16:51:58.339	157	0	0	0	43	0	0	0	0	0	1	0.045	100	0	44	0	0	0
0	0	0	0	0	0	0	1	0	0	0	269.184	0	0	0	3.4	103.4	0	0	0	-0.095	0	0	43	0	0	0	0	0	0	2019-02-14T01:00:00.000	1970-01-01T16:51:58.339	157	0	0	0	43	0	0	0	0	0	1	0.045	100	0	44	0	0	0
0	0	0	0	0	0	0	1	0	0	0	269.184	0	0	0	3.4	103.4	0	0	0	-0.085	0	0	43	0	0	0	0	0	0	2019-02-14T01:00:00.000	1970-01-01T16:51:58.459	157	0	0	0	43	0	0	0	0	0	1	0.037	100	0	44	0	0	0
0	0	0	0	0	0	0	1	0	0	0	269.184	0	0	0	3.4	103.4	0	0	0	-0.085	0	0	43	0	0	0	0	0	0	2019-02-14T01:00:00.000	1970-01-01T16:51:58.459	157	0	0	0	43	0	0	0	0	0	1	0.037	100	0	44	0	0	0
0	0	0	0	0	0	0	1	0	0	0	269.184	0	0	0	3.4	103.4	0	0	0	-0.085	0	0	43	0	0	0	0	0	0	2019-02-14T01:00:00.000	1970-01-01T16:51:58.459	157	0	0	0	43	0	0	0	0	0	1	0.037	100	0	44	0	0	0
0	0	0	0	0	0	0	1	0	0	0	269.184	0	0	0	3.4	103.4	0	0	0	-0.085	0	0	43	0	0	0	0	0	0	2019-02-14T01:00:00.000	1970-01-01T16:51:58.459	157	0	0	0	43	0	0	0	0	0	1	0.037	100	0	44	0	0	0
0	0	0	0	0	0	0	1	0	0	0	269.184	0	0	0	3.4	103.4	0	0	0	-0.085	0	0	43	0	0	0	0	0	0	2019-02-14T01:00:00.000	1970-01-01T16:51:58.459	157	0	0	0	43	0	0	0	0	0	1	0.037	100	0	44	0	0	0
0	0	0	0	0	0	0	1	0	0	0	269.184	0	0	0	3.4	103.4	0	0	0	-0.09	0	0	43	0	0	0	0	0	0	2019-02-14T01:00:00.000	1970-01-01T16:51:58.579	157	0	0	0	43	0	0	0	0	0	1	0.045	100	0	44	0	0	0
0	0	0	0	0	0	0	1	0	0	0	269.184	0	0	0	3.4	103.4	0	0	0	-0.09	0	0	43	0	0	0	0	0	0	2019-02-14T01:00:00.000	1970-01-01T16:51:58.579	157	0	0	0	43	0	0	0	0	0	1	0.045	100	0	44	0	0	0
0	0	0	0	0	0	0	1	0	0	0	269.184	0	0	0	3.4	103.4	0	0	0	-0.09	0	0	43	0	0	0	0	0	0	2019-02-14T01:00:00.000	1970-01-01T16:51:58.579	157	0	0	0	43	0	0	0	0	0	1	0.045	100	0	44	0	0	0
0	0	0	0	0	0	0	1	0	0	0	269.184	0	0	0	3.4	103.4	0	0	0	-0.09	0	0	43	0	0	0	0	0	0	2019-02-14T01:00:00.000	1970-01-01T16:51:58.579	157	0	0	0	43	0	0	0	0	0	1	0.045	100	0	44	0	0	0
0	0	0	0	0	0	0	1	0	0	0	269.184	0	0	0	3.4	103.4	0	0	0	-0.09	0	0	43	0	0	0	0	0	0	2019-02-14T01:00:00.000	1970-01-01T16:51:58.579	157	0	0	0	43	0	0	0	0	0	1	0.045	100	0	44	0	0	0
0	0	0	0	0	0	0	1	0	0	0	269.184	0	0	0	3.4	103.4	0	0	0	-0.09	0	0	43	0	0	0	0	0	0	2019-02-14T01:00:00.000	1970-01-01T16:51:58.689	157	0	0	0	43	0	0	0	0	0	1	0.052	100	0	44	0	0	0
0	0	0	0	0	0	0	1	0	0	0	269.184	0	0	0	3.4	103.4	0	0	0	-0.09	0	0	43	0	0	0	0	0	0	2019-02-14T01:00:00.000	1970-01-01T16:51:58.689	157	0	0	0	43	0	0	0	0	0	1	0.052	100	0	44	0	0	0
0	0	0	0	0	0	0	1	0	0	0	269.184	0	0	0	3.4	103.4	0	0	0	-0.09	0	0	43	0	0	0	0	0	0	2019-02-14T01:00:00.000	1970-01-01T16:51:58.689	157	0	0	0	43	0	0	0	0	0	1	0.052	100	0	44	0	0	0
0	0	0	0	0	0	0	1	0	0	0	269.184	0	0	0	3.4	103.4	0	0	0	-0.09	0	0	43	0	0	0	0	0	0	2019-02-14T01:00:00.000	1970-01-01T16:51:58.689	157	0	0	0	43	0	0	0	0	0	1	0.052	100	0	44	0	0	0
0	0	0	0	0	0	0	1	0	0	0	269.184	0	0	0	3.4	103.4	0	0	0	-0.09	0	0	43	0	0	0	0	0	0	2019-02-14T01:00:00.000	1970-01-01T16:51:58.689	157	0	0	0	43	0	0	0	0	0	1	0.052	100	0	44	0	0	0
0	0	0	0	0	0	0	1	0	0	0	269.184	0	0	0	3.4	103.4	0	0	0	-0.09	0	0	43	0	0	0	0	0	0	2019-02-14T01:00:00.000	1970-01-01T16:51:58.809	157	0	0	0	43	0	0	0	0	0	1	0.037	100	0	44	0	0	0
0	0	0	0	0	0	0	1	0	0	0	269.184	0	0	0	3.4	103.4	0	0	0	-0.09	0	0	43	0	0	0	0	0	0	2019-02-14T01:00:00.000	1970-01-01T16:51:58.809	157	0	0	0	43	0	0	0	0	0	1	0.037	100	0	44	0	0	0
0	0	0	0	0	0	0	1	0	0	0	269.184	0	0	0	3.4	103.4	0	0	0	-0.09	0	0	43	0	0	0	0	0	0	2019-02-14T01:00:00.000	1970-01-01T16:51:58.809	157	0	0	0	43	0	0	0	0	0	1	0.037	100	0	44	0	0	0
0	0	0	0	0	0	0	1	0	0	0	269.184	0	0	0	3.4	103.4	0	0	0	-0.09	0	0	43	0	0	0	0	0	0	2019-02-14T01:00:00.000	1970-01-01T16:51:58.809	157	0	0	0	43	0	0	0	0	0	1	0.037	100	0	44	0	0	0
0	0	0	0	0	0	0	1	0	0	0	269.184	0	0	0	3.4	103.4	0	0	0	-0.09	0	0	43	0	0	0	0	0	0	2019-02-14T01:00:00.000	1970-01-01T16:51:58.809	157	0	0	0	43	0	0	0	0	0	1	0.037	100	0	44	0	0	0
0	0	0	0	0	0	0	1	0	0	0	269.184	0	0	0	3.4	103.4	0	0	0	-0.085	0	0	43	0	0	0	0	0	0	2019-02-14T01:00:00.000	1970-01-01T16:51:58.929	157	0	0	0	43	0	0	0	0	0	1	0.045	100	0	44	0	0	0
0	0	0	0	0	0	0	1	0	0	0	269.184	0	0	0	3.4	103.4	0	0	0	-0.085	0	0	43	0	0	0	0	0	0	2019-02-14T01:00:00.000	1970-01-01T16:51:58.929	157	0	0	0	43	0	0	0	0	0	1	0.045	100	0	44	0	0	0
0	0	0	0	0	0	0	1	0	0	0	269.184	0	0	0	3.4	103.4	0	0	0	-0.085	0	0	43	0	0	0	0	0	0	2019-02-14T01:00:00.000	1970-01-01T16:51:58.929	157	0	0	0	43	0	0	0	0	0	1	0.045	100	0	44	0	0	0
0	0	0	0	0	0	0	1	0	0	0	269.184	0	0	0	3.4	103.4	0	0	0	-0.085	0	0	43	0	0	0	0	0	0	2019-02-14T01:00:00.000	1970-01-01T16:51:58.929	157	0	0	0	43	0	0	0	0	0	1	0.045	100	0	44	0	0	0
0	0	0	0	0	0	0	1	0	0	0	269.184	0	0	0	3.4	103.4	0	0	0	-0.085	0	0	43	0	0	0	0	0	0	2019-02-14T01:00:00.000	1970-01-01T16:51:58.929	157	0	0	0	43	0	0	0	0	0	1	0.045	100	0	44	0	0	0
0	0	0	0	0	0	0	1	0	0	0	269.184	0	0	0	3.4	103.4	0	0	0	-0.08	0	0	43	0	0	0	0	0	0	2019-02-14T01:00:00.000	1970-01-01T16:51:59.039	157	0	0	0	43	0	0	0	0	0	1	0.037	100	0	44	0	0	0
0	0	0	0	0	0	0	1	0	0	0	269.184	0	0	0	3.4	103.4	0	0	0	-0.08	0	0	43	0	0	0	0	0	0	2019-02-14T01:00:00.000	1970-01-01T16:51:59.039	157	0	0	0	43	0	0	0	0	0	1	0.037	100	0	44	0	0	0
0	0	0	0	0	0	0	1	0	0	0	269.184	0	0	0	3.4	103.4	0	0	0	-0.08	0	0	43	0	0	0	0	0	0	2019-02-14T01:00:00.000	1970-01-01T16:51:59.039	157	0	0	0	43	0	0	0	0	0	1	0.037	100	0	44	0	0	0
0	0	0	0	0	0	0	1	0	0	0	269.184	0	0	0	3.4	103.4	0	0	0	-0.08	0	0	43	0	0	0	0	0	0	2019-02-14T01:00:00.000	1970-01-01T16:51:59.039	157	0	0	0	43	0	0	0	0	0	1	0.037	100	0	44	0	0	0
0	0	0	0	0	0	0	1	0	0	0	269.184	0	0	0	3.4	103.4	0	0	0	-0.08	0	0	43	0	0	0	0	0	0	2019-02-14T01:00:00.000	1970-01-01T16:51:59.039	157	0	0	0	43	0	0	0	0	0	1	0.037	100	0	44	0	0	0
0	0	0	0	0	0	0	1	0	0	0	269.184	0	0	0	3.4	103.4	0	0	0	-0.09	0	0	43	0	0	0	0	0	0	2019-02-14T01:00:00.000	1970-01-01T16:51:59.159	157	0	0	0	43	0	0	0	0	0	1	0.03	100	0	44	0	0	0
0	0	0	0	0	0	0	1	0	0	0	269.184	0	0	0	3.4	103.4	0	0	0	-0.09	0	0	43	0	0	0	0	0	0	2019-02-14T01:00:00.000	1970-01-01T16:51:59.159	157	0	0	0	43	0	0	0	0	0	1	0.03	100	0	44	0	0	0
0	0	0	0	0	0	0	1	0	0	0	269.184	0	0	0	3.4	103.4	0	0	0	-0.09	0	0	43	0	0	0	0	0	0	2019-02-14T01:00:00.000	1970-01-01T16:51:59.159	157	0	0	0	43	0	0	0	0	0	1	0.03	100	0	44	0	0	0
0	0	0	0	0	0	0	1	0	0	0	269.184	0	0	0	3.4	103.4	0	0	0	-0.09	0	0	43	0	0	0	0	0	0	2019-02-14T01:00:00.000	1970-01-01T16:51:59.159	157	0	0	0	43	0	0	0	0	0	1	0.03	100	0	44	0	0	0
0	0	0	0	0	0	0	1	0	0	0	269.184	0	0	0	3.4	103.4	0	0	0	-0.09	0	0	43	0	0	0	0	0	0	2019-02-14T01:00:00.000	1970-01-01T16:51:59.159	157	0	0	0	43	0	0	0	0	0	1	0.03	100	0	44	0	0	0
0	0	0	0	0	0	0	1	0	0	0	269.184	0	0	0	3.4	103.4	0	0	0	-0.095	0	0	43	0	0	0	0	0	0	2019-02-14T01:00:00.000	1970-01-01T16:51:59.279	157	0	0	0	43	0	0	0	0	0	1	0.03	100	0	44	0	0	0
0	0	0	0	0	0	0	1	0	0	0	269.184	0	0	0	3.4	103.4	0	0	0	-0.095	0	0	43	0	0	0	0	0	0	2019-02-14T01:00:00.000	1970-01-01T16:51:59.279	157	0	0	0	43	0	0	0	0	0	1	0.03	100	0	44	0	0	0
0	0	0	0	0	0	0	1	0	0	0	269.184	0	0	0	3.4	103.4	0	0	0	-0.095	0	0	43	0	0	0	0	0	0	2019-02-14T01:00:00.000	1970-01-01T16:51:59.279	157	0	0	0	43	0	0	0	0	0	1	0.03	100	0	44	0	0	0
0	0	0	0	0	0	0	1	0	0	0	269.184	0	0	0	3.4	103.4	0	0	0	-0.095	0	0	43	0	0	0	0	0	0	2019-02-14T01:00:00.000	1970-01-01T16:51:59.279	157	0	0	0	43	0	0	0	0	0	1	0.03	100	0	44	0	0	0
0	0	0	0	0	0	0	1	0	0	0	269.184	0	0	0	3.4	103.4	0	0	0	-0.095	0	0	43	0	0	0	0	0	0	2019-02-14T01:00:00.000	1970-01-01T16:51:59.279	157	0	0	0	43	0	0	0	0	0	1	0.03	100	0	44	0	0	0
0	0	0	0	0	0	0	1	0	0	0	269.184	0	0	0	3.4	103.4	0	0	0	-0.09	0	0	43	0	0	0	0	0	0	2019-02-14T01:00:00.000	1970-01-01T16:51:59.389	157	0	0	0	43	0	0	0	0	0	1	0.052	100	0	44	0	0	0
0	0	0	0	0	0	0	1	0	0	0	269.184	0	0	0	3.4	103.4	0	0	0	-0.09	0	0	43	0	0	0	0	0	0	2019-02-14T01:00:00.000	1970-01-01T16:51:59.389	157	0	0	0	43	0	0	0	0	0	1	0.052	100	0	44	0	0	0
0	0	0	0	0	0	0	1	0	0	0	269.184	0	0	0	3.4	103.4	0	0	0	-0.09	0	0	43	0	0	0	0	0	0	2019-02-14T01:00:00.000	1970-01-01T16:51:59.389	157	0	0	0	43	0	0	0	0	0	1	0.052	100	0	44	0	0	0
0	0	0	0	0	0	0	1	0	0	0	269.184	0	0	0	3.4	103.4	0	0	0	-0.09	0	0	43	0	0	0	0	0	0	2019-02-14T01:00:00.000	1970-01-01T16:51:59.389	157	0	0	0	43	0	0	0	0	0	1	0.052	100	0	44	0	0	0
0	0	0	0	0	0	0	1	0	0	0	269.184	0	0	0	3.4	103.4	0	0	0	-0.09	0	0	43	0	0	0	0	0	0	2019-02-14T01:00:00.000	1970-01-01T16:51:59.389	157	0	0	0	43	0	0	0	0	0	1	0.052	100	0	44	0	0	0
0	0	0	0	0	0	0	1	0	0	0	269.184	0	0	0	3.4	103.4	0	0	0	-0.085	0	0	43	0	0	0	0	0	0	2019-02-14T01:00:00.000	1970-01-01T16:51:59.509	157	0	0	0	43	0	0	0	0	0	1	0.045	100	0	44	0	0	0
0	0	0	0	0	0	0	1	0	0	0	269.184	0	0	0	3.4	103.4	0	0	0	-0.085	0	0	43	0	0	0	0	0	0	2019-02-14T01:00:00.000	1970-01-01T16:51:59.509	157	0	0	0	43	0	0	0	0	0	1	0.045	100	0	44	0	0	0
0	0	0	0	0	0	0	1	0	0	0	269.184	0	0	0	3.4	103.4	0	0	0	-0.085	0	0	43	0	0	0	0	0	0	2019-02-14T01:00:00.000	1970-01-01T16:51:59.509	157	0	0	0	43	0	0	0	0	0	1	0.045	100	0	44	0	0	0
0	0	0	0	0	0	0	1	0	0	0	269.184	0	0	0	3.4	103.4	0	0	0	-0.085	0	0	43	0	0	0	0	0	0	2019-02-14T01:00:00.000	1970-01-01T16:51:59.509	157	0	0	0	43	0	0	0	0	0	1	0.045	100	0	44	0	0	0
0	0	0	0	0	0	0	1	0	0	0	269.184	0	0	0	3.4	103.4	0	0	0	-0.085	0	0	43	0	0	0	0	0	0	2019-02-14T01:00:00.000	1970-01-01T16:51:59.509	157	0	0	0	43	0	0	0	0	0	1	0.045	100	0	44	0	0	0
0	0	0	0	0	0	0	1	0	0	0	269.184	0	0	0	3.4	103.4	0	0	0	-0.09	0	0	43	0	0	0	0	0	0	2019-02-14T01:00:00.000	1970-01-01T16:51:59.629	157	0	0	0	43	0	0	0	0	0	1	0.045	100	0	44	0	0	0
0	0	0	0	0	0	0	1	0	0	0	269.184	0	0	0	3.4	103.4	0	0	0	-0.09	0	0	43	0	0	0	0	0	0	2019-02-14T01:00:00.000	1970-01-01T16:51:59.629	157	0	0	0	43	0	0	0	0	0	1	0.045	100	0	44	0	0	0
0	0	0	0	0	0	0	1	0	0	0	269.184	0	0	0	3.4	103.4	0	0	0	-0.09	0	0	43	0	0	0	0	0	0	2019-02-14T01:00:00.000	1970-01-01T16:51:59.629	157	0	0	0	43	0	0	0	0	0	1	0.045	100	0	44	0	0	0
0	0	0	0	0	0	0	1	0	0	0	269.184	0	0	0	3.4	103.4	0	0	0	-0.09	0	0	43	0	0	0	0	0	0	2019-02-14T01:00:00.000	1970-01-01T16:51:59.629	157	0	0	0	43	0	0	0	0	0	1	0.045	100	0	44	0	0	0
0	0	0	0	0	0	0	1	0	0	0	269.184	0	0	0	3.4	103.4	0	0	0	-0.09	0	0	43	0	0	0	0	0	0	2019-02-14T01:00:00.000	1970-01-01T16:51:59.629	157	0	0	0	43	0	0	0	0	0	1	0.045	100	0	44	0	0	0
0	0	0	0	0	0	0	1	0	0	0	269.184	0	0	0	3.4	103.4	0	0	0	-0.09	0	0	43	0	0	0	0	0	0	2019-02-14T01:00:00.000	1970-01-01T16:51:59.749	157	0	0	0	43	0	0	0	0	0	1	0.052	100	0	44	0	0	0
0	0	0	0	0	0	0	1	0	0	0	269.184	0	0	0	3.4	103.4	0	0	0	-0.09	0	0	43	0	0	0	0	0	0	2019-02-14T01:00:00.000	1970-01-01T16:51:59.749	157	0	0	0	43	0	0	0	0	0	1	0.052	100	0	44	0	0	0
0	0	0	0	0	0	0	1	0	0	0	269.184	0	0	0	3.4	103.4	0	0	0	-0.09	0	0	43	0	0	0	0	0	0	2019-02-14T01:00:00.000	1970-01-01T16:51:59.749	157	0	0	0	43	0	0	0	0	0	1	0.052	100	0	44	0	0	0
0	0	0	0	0	0	0	1	0	0	0	269.184	0	0	0	3.4	103.4	0	0	0	-0.09	0	0	43	0	0	0	0	0	0	2019-02-14T01:00:00.000	1970-01-01T16:51:59.749	157	0	0	0	43	0	0	0	0	0	1	0.052	100	0	44	0	0	0
0	0	0	0	0	0	0	1	0	0	0	269.184	0	0	0	3.4	103.4	0	0	0	-0.09	0	0	43	0	0	0	0	0	0	2019-02-14T01:00:00.000	1970-01-01T16:51:59.749	157	0	0	0	43	0	0	0	0	0	1	0.052	100	0	44	0	0	0
0	0	0	0	0	0	0	1	0	0	0	269.184	0	0	0	3.4	103.4	0	0	0	-0.08	0	0	43	0	0	0	0	0	0	2019-02-14T01:00:00.000	1970-01-01T16:51:59.859	157	0	0	0	43	0	0	0	0	0	1	0.045	100	0	44	0	0	0
0	0	0	0	0	0	0	1	0	0	0	269.184	0	0	0	3.4	103.4	0	0	0	-0.08	0	0	43	0	0	0	0	0	0	2019-02-14T01:00:00.000	1970-01-01T16:51:59.859	157	0	0	0	43	0	0	0	0	0	1	0.045	100	0	44	0	0	0
0	0	0	0	0	0	0	1	0	0	0	269.184	0	0	0	3.4	103.4	0	0	0	-0.08	0	0	43	0	0	0	0	0	0	2019-02-14T01:00:00.000	1970-01-01T16:51:59.859	157	0	0	0	43	0	0	0	0	0	1	0.045	100	0	44	0	0	0
0	0	0	0	0	0	0	1	0	0	0	269.184	0	0	0	3.4	103.4	0	0	0	-0.08	0	0	43	0	0	0	0	0	0	2019-02-14T01:00:00.000	1970-01-01T16:51:59.859	157	0	0	0	43	0	0	0	0	0	1	0.045	100	0	44	0	0	0
0	0	0	0	0	0	0	1	0	0	0	269.184	0	0	0	3.4	103.4	0	0	0	-0.08	0	0	43	0	0	0	0	0	0	2019-02-14T01:00:00.000	1970-01-01T16:51:59.859	157	0	0	0	43	0	0	0	0	0	1	0.045	100	0	44	0	0	0
0	0	0	0	0	0	0	1	0	0	0	269.184	0	0	0	3.4	103.4	0	0	0	-0.08	0	0	43	0	0	0	0	0	0	2019-02-14T01:00:00.000	1970-01-01T16:51:59.979	157	0	0	0	43	0	0	0	0	0	1	0.037	100	0	44	0	0	0
0	0	0	0	0	0	0	1	0	0	0	269.184	0	0	0	3.4	103.4	0	0	0	-0.08	0	0	43	0	0	0	0	0	0	2019-02-14T01:00:00.000	1970-01-01T16:51:59.979	157	0	0	0	43	0	0	0	0	0	1	0.037	100	0	44	0	0	0
0	0	0	0	0	0	0	1	0	0	0	269.184	0	0	0	3.4	103.4	0	0	0	-0.08	0	0	43	0	0	0	0	0	0	2019-02-14T01:00:00.000	1970-01-01T16:51:59.979	157	0	0	0	43	0	0	0	0	0	1	0.037	100	0	44	0	0	0
0	0	0	0	0	0	0	1	0	0	0	269.184	0	0	0	3.4	103.4	0	0	0	-0.08	0	0	43	0	0	0	0	0	0	2019-02-14T01:00:00.000	1970-01-01T16:51:59.979	157	0	0	0	43	0	0	0	0	0	1	0.037	100	0	44	0	0	0
0	0	0	0	0	0	0	1	0	0	0	269.184	0	0	0	3.4	103.4	0	0	0	-0.08	0	0	43	0	0	0	0	0	0	2019-02-14T01:00:00.000	1970-01-01T16:51:59.979	157	0	0	0	43	0	0	0	0	0	1	0.037	100	0	44	0	0	0
0	0	0	0	0	0	0	1	0	0	0	269.184	0	0	0	3.4	103.4	0	0	0	-0.09	0	0	43	0	0	0	0	0	0	2019-02-14T01:00:00.000	1970-01-01T16:52:00.099	157	0	0	0	43	0	0	0	0	0	1	0.037	100	0	44	0	0	0
0	0	0	0	0	0	0	1	0	0	0	269.184	0	0	0	3.4	103.4	0	0	0	-0.09	0	0	43	0	0	0	0	0	0	2019-02-14T01:00:00.000	1970-01-01T16:52:00.099	157	0	0	0	43	0	0	0	0	0	1	0.037	100	0	44	0	0	0
0	0	0	0	0	0	0	1	0	0	0	269.184	0	0	0	3.4	103.4	0	0	0	-0.09	0	0	43	0	0	0	0	0	0	2019-02-14T01:00:00.000	1970-01-01T16:52:00.099	157	0	0	0	43	0	0	0	0	0	1	0.037	100	0	44	0	0	0
0	0	0	0	0	0	0	1	0	0	0	269.184	0	0	0	3.4	103.4	0	0	0	-0.09	0	0	43	0	0	0	0	0	0	2019-02-14T01:00:00.000	1970-01-01T16:52:00.099	157	0	0	0	43	0	0	0	0	0	1	0.037	100	0	44	0	0	0
0	0	0	0	0	0	0	1	0	0	0	269.184	0	0	0	3.4	103.4	0	0	0	-0.09	0	0	43	0	0	0	0	0	0	2019-02-14T01:00:00.000	1970-01-01T16:52:00.099	157	0	0	0	43	0	0	0	0	0	1	0.037	100	0	44	0	0	0
0	0	0	0	0	0	0	1	0	0	0	269.184	0	0	0	3.4	103.4	0	0	0	-0.07	0	0	43	0	0	0	0	0	0	2019-02-14T01:00:00.000	1970-01-01T16:52:00.209	157	0	0	0	43	0	0	0	0	0	1	0.037	100	0	44	0	0	0
0	0	0	0	0	0	0	1	0	0	0	269.184	0	0	0	3.4	103.4	0	0	0	-0.07	0	0	43	0	0	0	0	0	0	2019-02-14T01:00:00.000	1970-01-01T16:52:00.209	157	0	0	0	43	0	0	0	0	0	1	0.037	100	0	44	0	0	0
0	0	0	0	0	0	0	1	0	0	0	269.184	0	0	0	3.4	103.4	0	0	0	-0.07	0	0	43	0	0	0	0	0	0	2019-02-14T01:00:00.000	1970-01-01T16:52:00.209	157	0	0	0	43	0	0	0	0	0	1	0.037	100	0	44	0	0	0
0	0	0	0	0	0	0	1	0	0	0	269.184	0	0	0	3.4	103.4	0	0	0	-0.07	0	0	43	0	0	0	0	0	0	2019-02-14T01:00:00.000	1970-01-01T16:52:00.209	157	0	0	0	43	0	0	0	0	0	1	0.037	100	0	44	0	0	0
0	0	0	0	0	0	0	1	0	0	0	269.184	0	0	0	3.4	103.4	0	0	0	-0.07	0	0	43	0	0	0	0	0	0	2019-02-14T01:00:00.000	1970-01-01T16:52:00.209	157	0	0	0	43	0	0	0	0	0	1	0.037	100	0	44	0	0	0
0	0	0	0	0	0	0	1	0	0	0	269.184	0	0	0	3.4	103.4	0	0	0	-0.085	0	0	43	0	0	0	0	0	0	2019-02-14T01:00:00.000	1970-01-01T16:52:00.329	157	0	0	0	43	0	0	0	0	0	1	0.045	100	0	44	0	0	0
0	0	0	0	0	0	0	1	0	0	0	269.184	0	0	0	3.4	103.4	0	0	0	-0.085	0	0	43	0	0	0	0	0	0	2019-02-14T01:00:00.000	1970-01-01T16:52:00.329	157	0	0	0	43	0	0	0	0	0	1	0.045	100	0	44	0	0	0
0	0	0	0	0	0	0	1	0	0	0	269.184	0	0	0	3.4	103.4	0	0	0	-0.085	0	0	43	0	0	0	0	0	0	2019-02-14T01:00:00.000	1970-01-01T16:52:00.329	157	0	0	0	43	0	0	0	0	0	1	0.045	100	0	44	0	0	0
0	0	0	0	0	0	0	1	0	0	0	269.184	0	0	0	3.4	103.4	0	0	0	-0.085	0	0	43	0	0	0	0	0	0	2019-02-14T01:00:00.000	1970-01-01T16:52:00.329	157	0	0	0	43	0	0	0	0	0	1	0.045	100	0	44	0	0	0
0	0	0	0	0	0	0	1	0	0	0	269.184	0	0	0	3.4	103.4	0	0	0	-0.085	0	0	43	0	0	0	0	0	0	2019-02-14T01:00:00.000	1970-01-01T16:52:00.329	157	0	0	0	43	0	0	0	0	0	1	0.045	100	0	44	0	0	0
0	0	0	0	0	0	0	1	0	0	0	269.184	0	0	0	3.4	103.4	0	0	0	-0.085	0	0	43	0	0	0	0	0	0	2019-02-14T01:00:00.000	1970-01-01T16:52:00.449	157	0	0	0	43	0	0	0	0	0	1	0.045	100	0	44	0	0	0
0	0	0	0	0	0	0	1	0	0	0	269.184	0	0	0	3.4	103.4	0	0	0	-0.085	0	0	43	0	0	0	0	0	0	2019-02-14T01:00:00.000	1970-01-01T16:52:00.449	157	0	0	0	43	0	0	0	0	0	1	0.045	100	0	44	0	0	0
0	0	0	0	0	0	0	1	0	0	0	269.184	0	0	0	3.4	103.4	0	0	0	-0.085	0	0	43	0	0	0	0	0	0	2019-02-14T01:00:00.000	1970-01-01T16:52:00.449	157	0	0	0	43	0	0	0	0	0	1	0.045	100	0	44	0	0	0
0	0	0	0	0	0	0	1	0	0	0	269.184	0	0	0	3.4	103.4	0	0	0	-0.085	0	0	43	0	0	0	0	0	0	2019-02-14T01:00:00.000	1970-01-01T16:52:00.449	157	0	0	0	43	0	0	0	0	0	1	0.045	100	0	44	0	0	0
0	0	0	0	0	0	0	1	0	0	0	269.184	0	0	0	3.4	103.4	0	0	0	-0.085	0	0	43	0	0	0	0	0	0	2019-02-14T01:00:00.000	1970-01-01T16:52:00.449	157	0	0	0	43	0	0	0	0	0	1	0.045	100	0	44	0	0	0
0	0	0	0	0	0	0	1	0	0	0	269.184	0	0	0	3.4	103.4	0	0	0	-0.085	0	0	43	0	0	0	0	0	0	2019-02-14T01:00:00.000	1970-01-01T16:52:00.559	157	0	0	0	43	0	0	0	0	0	1	0.037	100	0	44	0	0	0
0	0	0	0	0	0	0	1	0	0	0	269.184	0	0	0	3.4	103.4	0	0	0	-0.085	0	0	43	0	0	0	0	0	0	2019-02-14T01:00:00.000	1970-01-01T16:52:00.559	157	0	0	0	43	0	0	0	0	0	1	0.037	100	0	44	0	0	0
0	0	0	0	0	0	0	1	0	0	0	269.184	0	0	0	3.4	103.4	0	0	0	-0.085	0	0	43	0	0	0	0	0	0	2019-02-14T01:00:00.000	1970-01-01T16:52:00.559	157	0	0	0	43	0	0	0	0	0	1	0.037	100	0	44	0	0	0
0	0	0	0	0	0	0	1	0	0	0	269.184	0	0	0	3.4	103.4	0	0	0	-0.085	0	0	43	0	0	0	0	0	0	2019-02-14T01:00:00.000	1970-01-01T16:52:00.559	157	0	0	0	43	0	0	0	0	0	1	0.037	100	0	44	0	0	0
0	0	0	0	0	0	0	1	0	0	0	269.184	0	0	0	3.4	103.4	0	0	0	-0.085	0	0	43	0	0	0	0	0	0	2019-02-14T01:00:00.000	1970-01-01T16:52:00.559	157	0	0	0	43	0	0	0	0	0	1	0.037	100	0	44	0	0	0
0	0	0	0	0	0	0	1	0	0	0	269.184	0	0	0	3.4	103.4	0	0	0	-0.085	0	0	43	0	0	0	0	0	0	2019-02-14T01:00:00.000	1970-01-01T16:52:00.679	157	0	0	0	43	0	0	0	0	0	1	0.045	100	0	44	0	0	0
0	0	0	0	0	0	0	1	0	0	0	269.184	0	0	0	3.4	103.4	0	0	0	-0.085	0	0	43	0	0	0	0	0	0	2019-02-14T01:00:00.000	1970-01-01T16:52:00.679	157	0	0	0	43	0	0	0	0	0	1	0.045	100	0	44	0	0	0
0	0	0	0	0	0	0	1	0	0	0	269.184	0	0	0	3.4	103.4	0	0	0	-0.085	0	0	43	0	0	0	0	0	0	2019-02-14T01:00:00.000	1970-01-01T16:52:00.679	157	0	0	0	43	0	0	0	0	0	1	0.045	100	0	44	0	0	0
0	0	0	0	0	0	0	1	0	0	0	269.184	0	0	0	3.4	103.4	0	0	0	-0.085	0	0	43	0	0	0	0	0	0	2019-02-14T01:00:00.000	1970-01-01T16:52:00.679	157	0	0	0	43	0	0	0	0	0	1	0.045	100	0	44	0	0	0
0	0	0	0	0	0	0	1	0	0	0	269.184	0	0	0	3.4	103.4	0	0	0	-0.085	0	0	43	0	0	0	0	0	0	2019-02-14T01:00:00.000	1970-01-01T16:52:00.679	157	0	0	0	43	0	0	0	0	0	1	0.045	100	0	44	0	0	0
0	0	0	0	0	0	0	1	0	0	0	269.184	0	0	0	3.4	103.4	0	0	0	-0.08	0	0	43	0	0	0	0	0	0	2019-02-14T01:00:00.000	1970-01-01T16:52:00.799	157	0	0	0	43	0	0	0	0	0	1	0.045	100	0	44	0	0	0
0	0	0	0	0	0	0	1	0	0	0	269.184	0	0	0	3.4	103.4	0	0	0	-0.08	0	0	43	0	0	0	0	0	0	2019-02-14T01:00:00.000	1970-01-01T16:52:00.799	157	0	0	0	43	0	0	0	0	0	1	0.045	100	0	44	0	0	0
0	0	0	0	0	0	0	1	0	0	0	269.184	0	0	0	3.4	103.4	0	0	0	-0.08	0	0	43	0	0	0	0	0	0	2019-02-14T01:00:00.000	1970-01-01T16:52:00.799	157	0	0	0	43	0	0	0	0	0	1	0.045	100	0	44	0	0	0
0	0	0	0	0	0	0	1	0	0	0	269.184	0	0	0	3.4	103.4	0	0	0	-0.08	0	0	43	0	0	0	0	0	0	2019-02-14T01:00:00.000	1970-01-01T16:52:00.799	157	0	0	0	43	0	0	0	0	0	1	0.045	100	0	44	0	0	0
0	0	0	0	0	0	0	1	0	0	0	269.184	0	0	0	3.4	103.4	0	0	0	-0.08	0	0	43	0	0	0	0	0	0	2019-02-14T01:00:00.000	1970-01-01T16:52:00.799	157	0	0	0	43	0	0	0	0	0	1	0.045	100	0	44	0	0	0
0	0	0	0	0	0	0	1	0	0	0	269.184	0	0	0	3.4	103.4	0	0	0	-0.085	0	0	43	0	0	0	0	0	0	2019-02-14T01:00:00.000	1970-01-01T16:52:00.909	157	0	0	0	43	0	0	0	0	0	1	0.052	100	0	44	0	0	0
0	0	0	0	0	0	0	1	0	0	0	269.184	0	0	0	3.4	103.4	0	0	0	-0.085	0	0	43	0	0	0	0	0	0	2019-02-14T01:00:00.000	1970-01-01T16:52:00.909	157	0	0	0	43	0	0	0	0	0	1	0.052	100	0	44	0	0	0
0	0	0	0	0	0	0	1	0	0	0	269.184	0	0	0	3.4	103.4	0	0	0	-0.085	0	0	43	0	0	0	0	0	0	2019-02-14T01:00:00.000	1970-01-01T16:52:00.909	157	0	0	0	43	0	0	0	0	0	1	0.052	100	0	44	0	0	0
0	0	0	0	0	0	0	1	0	0	0	269.184	0	0	0	3.4	103.4	0	0	0	-0.085	0	0	43	0	0	0	0	0	0	2019-02-14T01:00:00.000	1970-01-01T16:52:00.909	157	0	0	0	43	0	0	0	0	0	1	0.052	100	0	44	0	0	0
0	0	0	0	0	0	0	1	0	0	0	269.184	0	0	0	3.4	103.4	0	0	0	-0.085	0	0	43	0	0	0	0	0	0	2019-02-14T01:00:00.000	1970-01-01T16:52:00.909	157	0	0	0	43	0	0	0	0	0	1	0.052	100	0	44	0	0	0
0	0	0	0	0	0	0	1	0	0	0	269.184	0	0	0	3.4	103.4	0	0	0	-0.085	0	0	43	0	0	0	0	0	0	2019-02-14T01:00:00.000	1970-01-01T16:52:01.029	157	0	0	0	43	0	0	0	0	0	1	0.037	100	0	44	0	0	0
0	0	0	0	0	0	0	1	0	0	0	269.184	0	0	0	3.4	103.4	0	0	0	-0.085	0	0	43	0	0	0	0	0	0	2019-02-14T01:00:00.000	1970-01-01T16:52:01.029	157	0	0	0	43	0	0	0	0	0	1	0.037	100	0	44	0	0	0
0	0	0	0	0	0	0	1	0	0	0	269.184	0	0	0	3.4	103.4	0	0	0	-0.085	0	0	43	0	0	0	0	0	0	2019-02-14T01:00:00.000	1970-01-01T16:52:01.029	157	0	0	0	43	0	0	0	0	0	1	0.037	100	0	44	0	0	0
0	0	0	0	0	0	0	1	0	0	0	269.184	0	0	0	3.4	103.4	0	0	0	-0.085	0	0	43	0	0	0	0	0	0	2019-02-14T01:00:00.000	1970-01-01T16:52:01.029	157	0	0	0	43	0	0	0	0	0	1	0.037	100	0	44	0	0	0
0	0	0	0	0	0	0	1	0	0	0	269.184	0	0	0	3.4	103.4	0	0	0	-0.085	0	0	43	0	0	0	0	0	0	2019-02-14T01:00:00.000	1970-01-01T16:52:01.029	157	0	0	0	43	0	0	0	0	0	1	0.037	100	0	44	0	0	0
0	0	0	0	0	0	0	1	0	0	0	269.184	0	0	0	3.4	103.4	0	0	0	-0.085	0	0	43	0	0	0	0	0	0	2019-02-14T01:00:00.000	1970-01-01T16:52:01.149	157	0	0	0	43	0	0	0	0	0	1	0.052	100	0	44	0	0	0
0	0	0	0	0	0	0	1	0	0	0	269.184	0	0	0	3.4	103.4	0	0	0	-0.085	0	0	43	0	0	0	0	0	0	2019-02-14T01:00:00.000	1970-01-01T16:52:01.149	157	0	0	0	43	0	0	0	0	0	1	0.052	100	0	44	0	0	0
0	0	0	0	0	0	0	1	0	0	0	269.184	0	0	0	3.4	103.4	0	0	0	-0.085	0	0	43	0	0	0	0	0	0	2019-02-14T01:00:00.000	1970-01-01T16:52:01.149	157	0	0	0	43	0	0	0	0	0	1	0.052	100	0	44	0	0	0
0	0	0	0	0	0	0	1	0	0	0	269.184	0	0	0	3.4	103.4	0	0	0	-0.085	0	0	43	0	0	0	0	0	0	2019-02-14T01:00:00.000	1970-01-01T16:52:01.149	157	0	0	0	43	0	0	0	0	0	1	0.052	100	0	44	0	0	0
0	0	0	0	0	0	0	1	0	0	0	269.184	0	0	0	3.4	103.4	0	0	0	-0.085	0	0	43	0	0	0	0	0	0	2019-02-14T01:00:00.000	1970-01-01T16:52:01.149	157	0	0	0	43	0	0	0	0	0	1	0.052	100	0	44	0	0	0
0	0	0	0	0	0	0	1	0	0	0	269.184	0	0	0	3.4	103.4	0	0	0	-0.09	0	0	43	0	0	0	0	0	0	2019-02-14T01:00:00.000	1970-01-01T16:52:01.269	157	0	0	0	43	0	0	0	0	0	1	0.045	100	0	44	0	0	0
0	0	0	0	0	0	0	1	0	0	0	269.184	0	0	0	3.4	103.4	0	0	0	-0.09	0	0	43	0	0	0	0	0	0	2019-02-14T01:00:00.000	1970-01-01T16:52:01.269	157	0	0	0	43	0	0	0	0	0	1	0.045	100	0	44	0	0	0
0	0	0	0	0	0	0	1	0	0	0	269.184	0	0	0	3.4	103.4	0	0	0	-0.09	0	0	43	0	0	0	0	0	0	2019-02-14T01:00:00.000	1970-01-01T16:52:01.269	157	0	0	0	43	0	0	0	0	0	1	0.045	100	0	44	0	0	0
0	0	0	0	0	0	0	1	0	0	0	269.184	0	0	0	3.4	103.4	0	0	0	-0.09	0	0	43	0	0	0	0	0	0	2019-02-14T01:00:00.000	1970-01-01T16:52:01.269	157	0	0	0	43	0	0	0	0	0	1	0.045	100	0	44	0	0	0
0	0	0	0	0	0	0	1	0	0	0	269.184	0	0	0	3.4	103.4	0	0	0	-0.09	0	0	43	0	0	0	0	0	0	2019-02-14T01:00:00.000	1970-01-01T16:52:01.269	157	0	0	0	43	0	0	0	0	0	1	0.045	100	0	44	0	0	0
0	0	0	0	0	0	0	1	0	0	0	269.184	0	0	0	3.4	103.4	0	0	0	-0.09	0	0	43	0	0	0	0	0	0	2019-02-14T01:00:00.000	1970-01-01T16:52:01.379	157	0	0	0	43	0	0	0	0	0	1	0.03	100	0	44	0	0	0
0	0	0	0	0	0	0	1	0	0	0	269.184	0	0	0	3.4	103.4	0	0	0	-0.09	0	0	43	0	0	0	0	0	0	2019-02-14T01:00:00.000	1970-01-01T16:52:01.379	157	0	0	0	43	0	0	0	0	0	1	0.03	100	0	44	0	0	0
0	0	0	0	0	0	0	1	0	0	0	269.184	0	0	0	3.4	103.4	0	0	0	-0.09	0	0	43	0	0	0	0	0	0	2019-02-14T01:00:00.000	1970-01-01T16:52:01.379	157	0	0	0	43	0	0	0	0	0	1	0.03	100	0	44	0	0	0
0	0	0	0	0	0	0	1	0	0	0	269.184	0	0	0	3.4	103.4	0	0	0	-0.09	0	0	43	0	0	0	0	0	0	2019-02-14T01:00:00.000	1970-01-01T16:52:01.379	157	0	0	0	43	0	0	0	0	0	1	0.03	100	0	44	0	0	0
0	0	0	0	0	0	0	1	0	0	0	269.184	0	0	0	3.4	103.4	0	0	0	-0.09	0	0	43	0	0	0	0	0	0	2019-02-14T01:00:00.000	1970-01-01T16:52:01.379	157	0	0	0	43	0	0	0	0	0	1	0.03	100	0	44	0	0	0
0	0	0	0	0	0	0	1	0	0	0	269.184	0	0	0	3.4	103.4	0	0	0	-0.095	0	0	43	0	0	0	0	0	0	2019-02-14T01:00:00.000	1970-01-01T16:52:01.499	157	0	0	0	43	0	0	0	0	0	1	0.052	100	0	44	0	0	0
0	0	0	0	0	0	0	1	0	0	0	269.184	0	0	0	3.4	103.4	0	0	0	-0.095	0	0	43	0	0	0	0	0	0	2019-02-14T01:00:00.000	1970-01-01T16:52:01.499	157	0	0	0	43	0	0	0	0	0	1	0.052	100	0	44	0	0	0
0	0	0	0	0	0	0	1	0	0	0	269.184	0	0	0	3.4	103.4	0	0	0	-0.095	0	0	43	0	0	0	0	0	0	2019-02-14T01:00:00.000	1970-01-01T16:52:01.499	157	0	0	0	43	0	0	0	0	0	1	0.052	100	0	44	0	0	0
0	0	0	0	0	0	0	1	0	0	0	269.184	0	0	0	3.4	103.4	0	0	0	-0.095	0	0	43	0	0	0	0	0	0	2019-02-14T01:00:00.000	1970-01-01T16:52:01.499	157	0	0	0	43	0	0	0	0	0	1	0.052	100	0	44	0	0	0
0	0	0	0	0	0	0	1	0	0	0	269.184	0	0	0	3.4	103.4	0	0	0	-0.095	0	0	43	0	0	0	0	0	0	2019-02-14T01:00:00.000	1970-01-01T16:52:01.499	157	0	0	0	43	0	0	0	0	0	1	0.052	100	0	44	0	0	0
0	0	0	0	0	0	0	1	0	0	0	269.184	0	0	0	3.4	103.4	0	0	0	-0.085	0	0	43	0	0	0	0	0	0	2019-02-14T01:00:00.000	1970-01-01T16:52:01.619	157	0	0	0	43	0	0	0	0	0	1	0.037	100	0	44	0	0	0
0	0	0	0	0	0	0	1	0	0	0	269.184	0	0	0	3.4	103.4	0	0	0	-0.085	0	0	43	0	0	0	0	0	0	2019-02-14T01:00:00.000	1970-01-01T16:52:01.619	157	0	0	0	43	0	0	0	0	0	1	0.037	100	0	44	0	0	0
0	0	0	0	0	0	0	1	0	0	0	269.184	0	0	0	3.4	103.4	0	0	0	-0.085	0	0	43	0	0	0	0	0	0	2019-02-14T01:00:00.000	1970-01-01T16:52:01.619	157	0	0	0	43	0	0	0	0	0	1	0.037	100	0	44	0	0	0
0	0	0	0	0	0	0	1	0	0	0	269.184	0	0	0	3.4	103.4	0	0	0	-0.085	0	0	43	0	0	0	0	0	0	2019-02-14T01:00:00.000	1970-01-01T16:52:01.619	157	0	0	0	43	0	0	0	0	0	1	0.037	100	0	44	0	0	0
0	0	0	0	0	0	0	1	0	0	0	269.184	0	0	0	3.4	103.4	0	0	0	-0.085	0	0	43	0	0	0	0	0	0	2019-02-14T01:00:00.000	1970-01-01T16:52:01.619	157	0	0	0	43	0	0	0	0	0	1	0.037	100	0	44	0	0	0
0	0	0	0	0	0	0	1	0	0	0	269.184	0	0	0	3.4	103.4	0	0	0	-0.09	0	0	43	0	0	0	0	0	0	2019-02-14T01:00:00.000	1970-01-01T16:52:01.729	157	0	0	0	43	0	0	0	0	0	1	0.037	100	0	44	0	0	0
0	0	0	0	0	0	0	1	0	0	0	269.184	0	0	0	3.4	103.4	0	0	0	-0.09	0	0	43	0	0	0	0	0	0	2019-02-14T01:00:00.000	1970-01-01T16:52:01.729	157	0	0	0	43	0	0	0	0	0	1	0.037	100	0	44	0	0	0
0	0	0	0	0	0	0	1	0	0	0	269.184	0	0	0	3.4	103.4	0	0	0	-0.09	0	0	43	0	0	0	0	0	0	2019-02-14T01:00:00.000	1970-01-01T16:52:01.729	157	0	0	0	43	0	0	0	0	0	1	0.037	100	0	44	0	0	0
0	0	0	0	0	0	0	1	0	0	0	269.184	0	0	0	3.4	103.4	0	0	0	-0.09	0	0	43	0	0	0	0	0	0	2019-02-14T01:00:00.000	1970-01-01T16:52:01.729	157	0	0	0	43	0	0	0	0	0	1	0.037	100	0	44	0	0	0
0	0	0	0	0	0	0	1	0	0	0	269.184	0	0	0	3.4	103.4	0	0	0	-0.09	0	0	43	0	0	0	0	0	0	2019-02-14T01:00:00.000	1970-01-01T16:52:01.729	157	0	0	0	43	0	0	0	0	0	1	0.037	100	0	44	0	0	0
0	0	0	0	0	0	0	1	0	0	0	269.184	0	0	0	3.4	103.4	0	0	0	-0.08	0	0	43	0	0	0	0	0	0	2019-02-14T01:00:00.000	1970-01-01T16:52:01.849	157	0	0	0	43	0	0	0	0	0	1	0.037	100	0	44	0	0	0
0	0	0	0	0	0	0	1	0	0	0	269.184	0	0	0	3.4	103.4	0	0	0	-0.08	0	0	43	0	0	0	0	0	0	2019-02-14T01:00:00.000	1970-01-01T16:52:01.849	157	0	0	0	43	0	0	0	0	0	1	0.037	100	0	44	0	0	0
0	0	0	0	0	0	0	1	0	0	0	269.184	0	0	0	3.4	103.4	0	0	0	-0.08	0	0	43	0	0	0	0	0	0	2019-02-14T01:00:00.000	1970-01-01T16:52:01.849	157	0	0	0	43	0	0	0	0	0	1	0.037	100	0	44	0	0	0
0	0	0	0	0	0	0	1	0	0	0	269.184	0	0	0	3.4	103.4	0	0	0	-0.08	0	0	43	0	0	0	0	0	0	2019-02-14T01:00:00.000	1970-01-01T16:52:01.849	157	0	0	0	43	0	0	0	0	0	1	0.037	100	0	44	0	0	0
0	0	0	0	0	0	0	1	0	0	0	269.184	0	0	0	3.4	103.4	0	0	0	-0.08	0	0	43	0	0	0	0	0	0	2019-02-14T01:00:00.000	1970-01-01T16:52:01.849	157	0	0	0	43	0	0	0	0	0	1	0.037	100	0	44	0	0	0
0	0	0	0	0	0	0	1	0	0	0	269.184	0	0	0	3.4	103.4	0	0	0	-0.085	0	0	43	0	0	0	0	0	0	2019-02-14T01:00:00.000	1970-01-01T16:52:01.969	157	0	0	0	43	0	0	0	0	0	1	0.045	100	0	44	0	0	0
0	0	0	0	0	0	0	1	0	0	0	269.184	0	0	0	3.4	103.4	0	0	0	-0.085	0	0	43	0	0	0	0	0	0	2019-02-14T01:00:00.000	1970-01-01T16:52:01.969	157	0	0	0	43	0	0	0	0	0	1	0.045	100	0	44	0	0	0
0	0	0	0	0	0	0	1	0	0	0	269.184	0	0	0	3.4	103.4	0	0	0	-0.085	0	0	43	0	0	0	0	0	0	2019-02-14T01:00:00.000	1970-01-01T16:52:01.969	157	0	0	0	43	0	0	0	0	0	1	0.045	100	0	44	0	0	0
0	0	0	0	0	0	0	1	0	0	0	269.184	0	0	0	3.4	103.4	0	0	0	-0.085	0	0	43	0	0	0	0	0	0	2019-02-14T01:00:00.000	1970-01-01T16:52:01.969	157	0	0	0	43	0	0	0	0	0	1	0.045	100	0	44	0	0	0
0	0	0	0	0	0	0	1	0	0	0	269.184	0	0	0	3.4	103.4	0	0	0	-0.085	0	0	43	0	0	0	0	0	0	2019-02-14T01:00:00.000	1970-01-01T16:52:01.969	157	0	0	0	43	0	0	0	0	0	1	0.045	100	0	44	0	0	0
0	0	0	0	0	0	0	1	0	0	0	269.184	0	0	0	3.4	103.4	0	0	0	-0.09	0	0	43	0	0	0	0	0	0	2019-02-14T01:00:00.000	1970-01-01T16:52:02.079	157	0	0	0	43	0	0	0	0	0	1	0.045	100	0	44	0	0	0
0	0	0	0	0	0	0	1	0	0	0	269.184	0	0	0	3.4	103.4	0	0	0	-0.09	0	0	43	0	0	0	0	0	0	2019-02-14T01:00:00.000	1970-01-01T16:52:02.079	157	0	0	0	43	0	0	0	0	0	1	0.045	100	0	44	0	0	0
0	0	0	0	0	0	0	1	0	0	0	269.184	0	0	0	3.4	103.4	0	0	0	-0.09	0	0	43	0	0	0	0	0	0	2019-02-14T01:00:00.000	1970-01-01T16:52:02.079	157	0	0	0	43	0	0	0	0	0	1	0.045	100	0	44	0	0	0
0	0	0	0	0	0	0	1	0	0	0	269.184	0	0	0	3.4	103.4	0	0	0	-0.08	0	0	43	0	0	0	0	0	0	2019-02-14T01:00:00.000	1970-01-01T16:52:02.409	157	0	0	0	43	0	0	0	0	0	1	0.045	100	0	44	0	0	0
0	0	0	0	0	0	0	1	0	0	0	269.184	0	0	0	3.4	103.4	0	0	0	-0.08	0	0	43	0	0	0	0	0	0	2019-02-14T01:00:00.000	1970-01-01T16:52:02.409	157	0	0	0	43	0	0	0	0	0	1	0.045	100	0	44	0	0	0
0	0	0	0	0	0	0	1	0	0	0	269.184	0	0	0	3.4	103.4	0	0	0	-0.08	0	0	43	0	0	0	0	0	0	2019-02-14T01:00:00.000	1970-01-01T16:52:02.409	157	0	0	0	43	0	0	0	0	0	1	0.045	100	0	44	0	0	0
0	0	0	0	0	0	0	1	0	0	0	269.184	0	0	0	3.4	103.4	0	0	0	-0.08	0	0	43	0	0	0	0	0	0	2019-02-14T01:00:00.000	1970-01-01T16:52:02.409	157	0	0	0	43	0	0	0	0	0	1	0.045	100	0	44	0	0	0
0	0	0	0	0	0	0	1	0	0	0	269.184	0	0	0	3.4	103.4	0	0	0	-0.08	0	0	43	0	0	0	0	0	0	2019-02-14T01:00:00.000	1970-01-01T16:52:02.409	157	0	0	0	43	0	0	0	0	0	1	0.045	100	0	44	0	0	0
0	0	0	0	0	0	0	1	0	0	0	269.184	0	0	0	3.4	103.4	0	0	0	-0.095	0	0	43	0	0	0	0	0	0	2019-02-14T01:00:00.000	1970-01-01T16:52:02.519	157	0	0	0	43	0	0	0	0	0	1	0.052	100	0	44	0	0	0
0	0	0	0	0	0	0	1	0	0	0	269.184	0	0	0	3.4	103.4	0	0	0	-0.095	0	0	43	0	0	0	0	0	0	2019-02-14T01:00:00.000	1970-01-01T16:52:02.519	157	0	0	0	43	0	0	0	0	0	1	0.052	100	0	44	0	0	0
0	0	0	0	0	0	0	1	0	0	0	269.184	0	0	0	3.4	103.4	0	0	0	-0.095	0	0	43	0	0	0	0	0	0	2019-02-14T01:00:00.000	1970-01-01T16:52:02.519	157	0	0	0	43	0	0	0	0	0	1	0.052	100	0	44	0	0	0
0	0	0	0	0	0	0	1	0	0	0	269.184	0	0	0	3.4	103.4	0	0	0	-0.095	0	0	43	0	0	0	0	0	0	2019-02-14T01:00:00.000	1970-01-01T16:52:02.519	157	0	0	0	43	0	0	0	0	0	1	0.052	100	0	44	0	0	0
0	0	0	0	0	0	0	1	0	0	0	269.184	0	0	0	3.4	103.4	0	0	0	-0.095	0	0	43	0	0	0	0	0	0	2019-02-14T01:00:00.000	1970-01-01T16:52:02.519	157	0	0	0	43	0	0	0	0	0	1	0.052	100	0	44	0	0	0
0	0	0	0	0	0	0	1	0	0	0	269.184	0	0	0	3.4	103.4	0	0	0	-0.09	0	0	43	0	0	0	0	0	0	2019-02-14T01:00:00.000	1970-01-01T16:52:02.639	157	0	0	0	43	0	0	0	0	0	1	0.037	100	0	44	0	0	0
0	0	0	0	0	0	0	1	0	0	0	269.184	0	0	0	3.4	103.4	0	0	0	-0.09	0	0	43	0	0	0	0	0	0	2019-02-14T01:00:00.000	1970-01-01T16:52:02.639	157	0	0	0	43	0	0	0	0	0	1	0.037	100	0	44	0	0	0
0	0	0	0	0	0	0	1	0	0	0	269.184	0	0	0	3.4	103.4	0	0	0	-0.09	0	0	43	0	0	0	0	0	0	2019-02-14T01:00:00.000	1970-01-01T16:52:02.639	157	0	0	0	43	0	0	0	0	0	1	0.037	100	0	44	0	0	0
0	0	0	0	0	0	0	1	0	0	0	269.184	0	0	0	3.4	103.4	0	0	0	-0.09	0	0	43	0	0	0	0	0	0	2019-02-14T01:00:00.000	1970-01-01T16:52:02.639	157	0	0	0	43	0	0	0	0	0	1	0.037	100	0	44	0	0	0
0	0	0	0	0	0	0	1	0	0	0	269.184	0	0	0	3.4	103.4	0	0	0	-0.09	0	0	43	0	0	0	0	0	0	2019-02-14T01:00:00.000	1970-01-01T16:52:02.639	157	0	0	0	43	0	0	0	0	0	1	0.037	100	0	44	0	0	0
0	0	0	0	0	0	0	1	0	0	0	269.184	0	0	0	3.4	103.4	0	0	0	-0.095	0	0	43	0	0	0	0	0	0	2019-02-14T01:00:00.000	1970-01-01T16:52:02.759	157	0	0	0	43	0	0	0	0	0	1	0.037	100	0	44	0	0	0
0	0	0	0	0	0	0	1	0	0	0	269.184	0	0	0	3.4	103.4	0	0	0	-0.095	0	0	43	0	0	0	0	0	0	2019-02-14T01:00:00.000	1970-01-01T16:52:02.759	157	0	0	0	43	0	0	0	0	0	1	0.037	100	0	44	0	0	0
0	0	0	0	0	0	0	1	0	0	0	269.184	0	0	0	3.4	103.4	0	0	0	-0.095	0	0	43	0	0	0	0	0	0	2019-02-14T01:00:00.000	1970-01-01T16:52:02.759	157	0	0	0	43	0	0	0	0	0	1	0.037	100	0	44	0	0	0
0	0	0	0	0	0	0	1	0	0	0	269.184	0	0	0	3.4	103.4	0	0	0	-0.095	0	0	43	0	0	0	0	0	0	2019-02-14T01:00:00.000	1970-01-01T16:52:02.759	157	0	0	0	43	0	0	0	0	0	1	0.037	100	0	44	0	0	0
0	0	0	0	0	0	0	1	0	0	0	269.184	0	0	0	3.4	103.4	0	0	0	-0.095	0	0	43	0	0	0	0	0	0	2019-02-14T01:00:00.000	1970-01-01T16:52:02.759	157	0	0	0	43	0	0	0	0	0	1	0.037	100	0	44	0	0	0
0	0	0	0	0	0	0	1	0	0	0	269.184	0	0	0	3.4	103.4	0	0	0	-0.085	0	0	43	0	0	0	0	0	0	2019-02-14T01:00:00.000	1970-01-01T16:52:02.879	157	0	0	0	43	0	0	0	0	0	1	0.037	100	0	44	0	0	0
0	0	0	0	0	0	0	1	0	0	0	269.184	0	0	0	3.4	103.4	0	0	0	-0.085	0	0	43	0	0	0	0	0	0	2019-02-14T01:00:00.000	1970-01-01T16:52:02.879	157	0	0	0	43	0	0	0	0	0	1	0.037	100	0	44	0	0	0
0	0	0	0	0	0	0	1	0	0	0	269.184	0	0	0	3.4	103.4	0	0	0	-0.085	0	0	43	0	0	0	0	0	0	2019-02-14T01:00:00.000	1970-01-01T16:52:02.879	157	0	0	0	43	0	0	0	0	0	1	0.037	100	0	44	0	0	0
0	0	0	0	0	0	0	1	0	0	0	269.184	0	0	0	3.4	103.4	0	0	0	-0.085	0	0	43	0	0	0	0	0	0	2019-02-14T01:00:00.000	1970-01-01T16:52:02.879	157	0	0	0	43	0	0	0	0	0	1	0.037	100	0	44	0	0	0
0	0	0	0	0	0	0	1	0	0	0	269.184	0	0	0	3.4	103.4	0	0	0	-0.085	0	0	43	0	0	0	0	0	0	2019-02-14T01:00:00.000	1970-01-01T16:52:02.879	157	0	0	0	43	0	0	0	0	0	1	0.037	100	0	44	0	0	0
0	0	0	0	0	0	0	1	0	0	0	269.184	0	0	0	3.4	103.4	0	0	0	-0.075	0	0	43	0	0	0	0	0	0	2019-02-14T01:00:00.000	1970-01-01T16:52:02.989	157	0	0	0	43	0	0	0	0	0	1	0.037	100	0	44	0	0	0
0	0	0	0	0	0	0	1	0	0	0	269.184	0	0	0	3.4	103.4	0	0	0	-0.075	0	0	43	0	0	0	0	0	0	2019-02-14T01:00:00.000	1970-01-01T16:52:02.989	157	0	0	0	43	0	0	0	0	0	1	0.037	100	0	44	0	0	0
0	0	0	0	0	0	0	1	0	0	0	269.184	0	0	0	3.4	103.4	0	0	0	-0.075	0	0	43	0	0	0	0	0	0	2019-02-14T01:00:00.000	1970-01-01T16:52:02.989	157	0	0	0	43	0	0	0	0	0	1	0.037	100	0	44	0	0	0
0	0	0	0	0	0	0	1	0	0	0	269.184	0	0	0	3.4	103.4	0	0	0	-0.075	0	0	43	0	0	0	0	0	0	2019-02-14T01:00:00.000	1970-01-01T16:52:02.989	157	0	0	0	43	0	0	0	0	0	1	0.037	100	0	44	0	0	0
0	0	0	0	0	0	0	1	0	0	0	269.184	0	0	0	3.4	103.4	0	0	0	-0.075	0	0	43	0	0	0	0	0	0	2019-02-14T01:00:00.000	1970-01-01T16:52:02.989	157	0	0	0	43	0	0	0	0	0	1	0.037	100	0	44	0	0	0
0	0	0	0	0	0	0	1	0	0	0	269.184	0	0	0	3.4	103.4	0	0	0	-0.09	0	0	43	0	0	0	0	0	0	2019-02-14T01:00:00.000	1970-01-01T16:52:03.109	157	0	0	0	43	0	0	0	0	0	1	0.037	100	0	44	0	0	0
0	0	0	0	0	0	0	1	0	0	0	269.184	0	0	0	3.4	103.4	0	0	0	-0.09	0	0	43	0	0	0	0	0	0	2019-02-14T01:00:00.000	1970-01-01T16:52:03.109	157	0	0	0	43	0	0	0	0	0	1	0.037	100	0	44	0	0	0
0	0	0	0	0	0	0	1	0	0	0	269.184	0	0	0	3.4	103.4	0	0	0	-0.09	0	0	43	0	0	0	0	0	0	2019-02-14T01:00:00.000	1970-01-01T16:52:03.109	157	0	0	0	43	0	0	0	0	0	1	0.037	100	0	44	0	0	0
0	0	0	0	0	0	0	1	0	0	0	269.184	0	0	0	3.4	103.4	0	0	0	-0.09	0	0	43	0	0	0	0	0	0	2019-02-14T01:00:00.000	1970-01-01T16:52:03.109	157	0	0	0	43	0	0	0	0	0	1	0.037	100	0	44	0	0	0
0	0	0	0	0	0	0	1	0	0	0	269.184	0	0	0	3.4	103.4	0	0	0	-0.09	0	0	43	0	0	0	0	0	0	2019-02-14T01:00:00.000	1970-01-01T16:52:03.109	157	0	0	0	43	0	0	0	0	0	1	0.037	100	0	44	0	0	0
0	0	0	0	0	0	0	1	0	0	0	269.184	0	0	0	3.4	103.4	0	0	0	-0.09	0	0	43	0	0	0	0	0	0	2019-02-14T01:00:00.000	1970-01-01T16:52:03.229	157	0	0	0	43	0	0	0	0	0	1	0.067	100	0	44	0	0	0
0	0	0	0	0	0	0	1	0	0	0	269.184	0	0	0	3.4	103.4	0	0	0	-0.09	0	0	43	0	0	0	0	0	0	2019-02-14T01:00:00.000	1970-01-01T16:52:03.229	157	0	0	0	43	0	0	0	0	0	1	0.067	100	0	44	0	0	0
0	0	0	0	0	0	0	1	0	0	0	269.184	0	0	0	3.4	103.4	0	0	0	-0.09	0	0	43	0	0	0	0	0	0	2019-02-14T01:00:00.000	1970-01-01T16:52:03.229	157	0	0	0	43	0	0	0	0	0	1	0.067	100	0	44	0	0	0
0	0	0	0	0	0	0	1	0	0	0	269.184	0	0	0	3.4	103.4	0	0	0	-0.09	0	0	43	0	0	0	0	0	0	2019-02-14T01:00:00.000	1970-01-01T16:52:03.229	157	0	0	0	43	0	0	0	0	0	1	0.067	100	0	44	0	0	0
0	0	0	0	0	0	0	1	0	0	0	269.184	0	0	0	3.4	103.4	0	0	0	-0.09	0	0	43	0	0	0	0	0	0	2019-02-14T01:00:00.000	1970-01-01T16:52:03.229	157	0	0	0	43	0	0	0	0	0	1	0.067	100	0	44	0	0	0
0	0	0	0	0	0	0	1	0	0	0	269.184	0	0	0	3.4	103.4	0	0	0	-0.1	0	0	43	0	0	0	0	0	0	2019-02-14T01:00:00.000	1970-01-01T16:52:03.339	157	0	0	0	43	0	0	0	0	0	1	0.037	100	0	44	0	0	0
0	0	0	0	0	0	0	1	0	0	0	269.184	0	0	0	3.4	103.4	0	0	0	-0.1	0	0	43	0	0	0	0	0	0	2019-02-14T01:00:00.000	1970-01-01T16:52:03.339	157	0	0	0	43	0	0	0	0	0	1	0.037	100	0	44	0	0	0
0	0	0	0	0	0	0	1	0	0	0	269.184	0	0	0	3.4	103.4	0	0	0	-0.1	0	0	43	0	0	0	0	0	0	2019-02-14T01:00:00.000	1970-01-01T16:52:03.339	157	0	0	0	43	0	0	0	0	0	1	0.037	100	0	44	0	0	0
0	0	0	0	0	0	0	1	0	0	0	269.184	0	0	0	3.4	103.4	0	0	0	-0.1	0	0	43	0	0	0	0	0	0	2019-02-14T01:00:00.000	1970-01-01T16:52:03.339	157	0	0	0	43	0	0	0	0	0	1	0.037	100	0	44	0	0	0
0	0	0	0	0	0	0	1	0	0	0	269.184	0	0	0	3.4	103.4	0	0	0	-0.1	0	0	43	0	0	0	0	0	0	2019-02-14T01:00:00.000	1970-01-01T16:52:03.339	157	0	0	0	43	0	0	0	0	0	1	0.037	100	0	44	0	0	0
0	0	0	0	0	0	0	1	0	0	0	269.184	0	0	0	3.4	103.4	0	0	0	-0.085	0	0	43	0	0	0	0	0	0	2019-02-14T01:00:00.000	1970-01-01T16:52:03.459	157	0	0	0	43	0	0	0	0	0	1	0.037	100	0	44	0	0	0
0	0	0	0	0	0	0	1	0	0	0	269.184	0	0	0	3.4	103.4	0	0	0	-0.085	0	0	43	0	0	0	0	0	0	2019-02-14T01:00:00.000	1970-01-01T16:52:03.459	157	0	0	0	43	0	0	0	0	0	1	0.037	100	0	44	0	0	0
0	0	0	0	0	0	0	1	0	0	0	269.184	0	0	0	3.4	103.4	0	0	0	-0.085	0	0	43	0	0	0	0	0	0	2019-02-14T01:00:00.000	1970-01-01T16:52:03.459	157	0	0	0	43	0	0	0	0	0	1	0.037	100	0	44	0	0	0
0	0	0	0	0	0	0	1	0	0	0	269.184	0	0	0	3.4	103.4	0	0	0	-0.085	0	0	43	0	0	0	0	0	0	2019-02-14T01:00:00.000	1970-01-01T16:52:03.459	157	0	0	0	43	0	0	0	0	0	1	0.037	100	0	44	0	0	0
0	0	0	0	0	0	0	1	0	0	0	269.184	0	0	0	3.4	103.4	0	0	0	-0.085	0	0	43	0	0	0	0	0	0	2019-02-14T01:00:00.000	1970-01-01T16:52:03.459	157	0	0	0	43	0	0	0	0	0	1	0.037	100	0	44	0	0	0
0	0	0	0	0	0	0	1	0	0	0	269.184	0	0	0	3.4	103.4	0	0	0	-0.09	0	0	43	0	0	0	0	0	0	2019-02-14T01:00:00.000	1970-01-01T16:52:03.579	157	0	0	0	43	0	0	0	0	0	1	0.037	100	0	44	0	0	0
0	0	0	0	0	0	0	1	0	0	0	269.184	0	0	0	3.4	103.4	0	0	0	-0.09	0	0	43	0	0	0	0	0	0	2019-02-14T01:00:00.000	1970-01-01T16:52:03.579	157	0	0	0	43	0	0	0	0	0	1	0.037	100	0	44	0	0	0
0	0	0	0	0	0	0	1	0	0	0	269.184	0	0	0	3.4	103.4	0	0	0	-0.09	0	0	43	0	0	0	0	0	0	2019-02-14T01:00:00.000	1970-01-01T16:52:03.579	157	0	0	0	43	0	0	0	0	0	1	0.037	100	0	44	0	0	0
0	0	0	0	0	0	0	1	0	0	0	269.184	0	0	0	3.4	103.4	0	0	0	-0.09	0	0	43	0	0	0	0	0	0	2019-02-14T01:00:00.000	1970-01-01T16:52:03.579	157	0	0	0	43	0	0	0	0	0	1	0.037	100	0	44	0	0	0
0	0	0	0	0	0	0	1	0	0	0	269.184	0	0	0	3.4	103.4	0	0	0	-0.09	0	0	43	0	0	0	0	0	0	2019-02-14T01:00:00.000	1970-01-01T16:52:03.579	157	0	0	0	43	0	0	0	0	0	1	0.037	100	0	44	0	0	0
0	0	0	0	0	0	0	1	0	0	0	269.184	0	0	0	3.4	103.4	0	0	0	-0.085	0	0	43	0	0	0	0	0	0	2019-02-14T01:00:00.000	1970-01-01T16:52:03.699	157	0	0	0	43	0	0	0	0	0	1	0.037	100	0	44	0	0	0
0	0	0	0	0	0	0	1	0	0	0	269.184	0	0	0	3.4	103.4	0	0	0	-0.085	0	0	43	0	0	0	0	0	0	2019-02-14T01:00:00.000	1970-01-01T16:52:03.699	157	0	0	0	43	0	0	0	0	0	1	0.037	100	0	44	0	0	0
0	0	0	0	0	0	0	1	0	0	0	269.184	0	0	0	3.4	103.4	0	0	0	-0.085	0	0	43	0	0	0	0	0	0	2019-02-14T01:00:00.000	1970-01-01T16:52:03.699	157	0	0	0	43	0	0	0	0	0	1	0.037	100	0	44	0	0	0
0	0	0	0	0	0	0	1	0	0	0	269.184	0	0	0	3.4	103.4	0	0	0	-0.085	0	0	43	0	0	0	0	0	0	2019-02-14T01:00:00.000	1970-01-01T16:52:03.699	157	0	0	0	43	0	0	0	0	0	1	0.037	100	0	44	0	0	0
0	0	0	0	0	0	0	1	0	0	0	269.184	0	0	0	3.4	103.4	0	0	0	-0.085	0	0	43	0	0	0	0	0	0	2019-02-14T01:00:00.000	1970-01-01T16:52:03.699	157	0	0	0	43	0	0	0	0	0	1	0.037	100	0	44	0	0	0
0	0	0	0	0	0	0	1	0	0	0	269.184	0	0	0	3.4	103.4	0	0	0	-0.09	0	0	43	0	0	0	0	0	0	2019-02-14T01:00:00.000	1970-01-01T16:52:03.819	157	0	0	0	43	0	0	0	0	0	1	0.037	100	0	44	0	0	0
0	0	0	0	0	0	0	1	0	0	0	269.184	0	0	0	3.4	103.4	0	0	0	-0.09	0	0	43	0	0	0	0	0	0	2019-02-14T01:00:00.000	1970-01-01T16:52:03.819	157	0	0	0	43	0	0	0	0	0	1	0.037	100	0	44	0	0	0
0	0	0	0	0	0	0	1	0	0	0	269.184	0	0	0	3.4	103.4	0	0	0	-0.09	0	0	43	0	0	0	0	0	0	2019-02-14T01:00:00.000	1970-01-01T16:52:03.819	157	0	0	0	43	0	0	0	0	0	1	0.037	100	0	44	0	0	0
0	0	0	0	0	0	0	1	0	0	0	269.184	0	0	0	3.4	103.4	0	0	0	-0.09	0	0	43	0	0	0	0	0	0	2019-02-14T01:00:00.000	1970-01-01T16:52:03.819	157	0	0	0	43	0	0	0	0	0	1	0.037	100	0	44	0	0	0
0	0	0	0	0	0	0	1	0	0	0	269.184	0	0	0	3.4	103.4	0	0	0	-0.09	0	0	43	0	0	0	0	0	0	2019-02-14T01:00:00.000	1970-01-01T16:52:03.819	157	0	0	0	43	0	0	0	0	0	1	0.037	100	0	44	0	0	0
0	0	0	0	0	0	0	1	0	0	0	269.184	0	0	0	3.4	103.4	0	0	0	-0.08	0	0	43	0	0	0	0	0	0	2019-02-14T01:00:00.000	1970-01-01T16:52:03.929	157	0	0	0	43	0	0	0	0	0	1	0.037	100	0	44	0	0	0
0	0	0	0	0	0	0	1	0	0	0	269.184	0	0	0	3.4	103.4	0	0	0	-0.08	0	0	43	0	0	0	0	0	0	2019-02-14T01:00:00.000	1970-01-01T16:52:03.929	157	0	0	0	43	0	0	0	0	0	1	0.037	100	0	44	0	0	0
0	0	0	0	0	0	0	1	0	0	0	269.184	0	0	0	3.4	103.4	0	0	0	-0.08	0	0	43	0	0	0	0	0	0	2019-02-14T01:00:00.000	1970-01-01T16:52:03.929	157	0	0	0	43	0	0	0	0	0	1	0.037	100	0	44	0	0	0
0	0	0	0	0	0	0	1	0	0	0	269.184	0	0	0	3.4	103.4	0	0	0	-0.08	0	0	43	0	0	0	0	0	0	2019-02-14T01:00:00.000	1970-01-01T16:52:03.929	157	0	0	0	43	0	0	0	0	0	1	0.037	100	0	44	0	0	0
0	0	0	0	0	0	0	1	0	0	0	269.184	0	0	0	3.4	103.4	0	0	0	-0.08	0	0	43	0	0	0	0	0	0	2019-02-14T01:00:00.000	1970-01-01T16:52:03.929	157	0	0	0	43	0	0	0	0	0	1	0.037	100	0	44	0	0	0
0	0	0	0	0	0	0	1	0	0	0	269.184	0	0	0	3.4	103.4	0	0	0	-0.075	0	0	43	0	0	0	0	0	0	2019-02-14T01:00:00.000	1970-01-01T16:52:04.299	157	0	0	0	43	0	0	0	0	0	1	0.052	100	0	44	0	0	0
0	0	0	0	0	0	0	1	0	0	0	269.184	0	0	0	3.4	103.4	0	0	0	-0.075	0	0	43	0	0	0	0	0	0	2019-02-14T01:00:00.000	1970-01-01T16:52:04.299	157	0	0	0	43	0	0	0	0	0	1	0.052	100	0	44	0	0	0
0	0	0	0	0	0	0	1	0	0	0	269.184	0	0	0	3.4	103.4	0	0	0	-0.075	0	0	43	0	0	0	0	0	0	2019-02-14T01:00:00.000	1970-01-01T16:52:04.299	157	0	0	0	43	0	0	0	0	0	1	0.052	100	0	44	0	0	0
0	0	0	0	0	0	0	1	0	0	0	269.184	0	0	0	3.4	103.4	0	0	0	-0.075	0	0	43	0	0	0	0	0	0	2019-02-14T01:00:00.000	1970-01-01T16:52:04.299	157	0	0	0	43	0	0	0	0	0	1	0.052	100	0	44	0	0	0
0	0	0	0	0	0	0	1	0	0	0	269.184	0	0	0	3.4	103.4	0	0	0	-0.075	0	0	43	0	0	0	0	0	0	2019-02-14T01:00:00.000	1970-01-01T16:52:04.299	157	0	0	0	43	0	0	0	0	0	1	0.052	100	0	44	0	0	0
0	0	0	0	0	0	0	1	0	0	0	269.184	0	0	0	3.4	103.4	0	0	0	-0.095	0	0	43	0	0	0	0	0	0	2019-02-14T01:00:00.000	1970-01-01T16:52:04.419	157	0	0	0	43	0	0	0	0	0	1	0.037	100	0	44	0	0	0
0	0	0	0	0	0	0	1	0	0	0	269.184	0	0	0	3.4	103.4	0	0	0	-0.095	0	0	43	0	0	0	0	0	0	2019-02-14T01:00:00.000	1970-01-01T16:52:04.419	157	0	0	0	43	0	0	0	0	0	1	0.037	100	0	44	0	0	0
0	0	0	0	0	0	0	1	0	0	0	269.184	0	0	0	3.4	103.4	0	0	0	-0.095	0	0	43	0	0	0	0	0	0	2019-02-14T01:00:00.000	1970-01-01T16:52:04.419	157	0	0	0	43	0	0	0	0	0	1	0.037	100	0	44	0	0	0
0	0	0	0	0	0	0	1	0	0	0	269.184	0	0	0	3.4	103.4	0	0	0	-0.095	0	0	43	0	0	0	0	0	0	2019-02-14T01:00:00.000	1970-01-01T16:52:04.419	157	0	0	0	43	0	0	0	0	0	1	0.037	100	0	44	0	0	0
0	0	0	0	0	0	0	1	0	0	0	269.184	0	0	0	3.4	103.4	0	0	0	-0.095	0	0	43	0	0	0	0	0	0	2019-02-14T01:00:00.000	1970-01-01T16:52:04.419	157	0	0	0	43	0	0	0	0	0	1	0.037	100	0	44	0	0	0
0	0	0	0	0	0	0	1	0	0	0	269.184	0	0	0	3.4	103.4	0	0	0	-0.09	0	0	43	0	0	0	0	0	0	2019-02-14T01:00:00.000	1970-01-01T16:52:04.529	157	0	0	0	43	0	0	0	0	0	1	0.045	100	0	44	0	0	0
0	0	0	0	0	0	0	1	0	0	0	269.184	0	0	0	3.4	103.4	0	0	0	-0.09	0	0	43	0	0	0	0	0	0	2019-02-14T01:00:00.000	1970-01-01T16:52:04.529	157	0	0	0	43	0	0	0	0	0	1	0.045	100	0	44	0	0	0
0	0	0	0	0	0	0	1	0	0	0	269.184	0	0	0	3.4	103.4	0	0	0	-0.09	0	0	43	0	0	0	0	0	0	2019-02-14T01:00:00.000	1970-01-01T16:52:04.529	157	0	0	0	43	0	0	0	0	0	1	0.045	100	0	44	0	0	0
0	0	0	0	0	0	0	1	0	0	0	269.184	0	0	0	3.4	103.4	0	0	0	-0.09	0	0	43	0	0	0	0	0	0	2019-02-14T01:00:00.000	1970-01-01T16:52:04.529	157	0	0	0	43	0	0	0	0	0	1	0.045	100	0	44	0	0	0
0	0	0	0	0	0	0	1	0	0	0	269.184	0	0	0	3.4	103.4	0	0	0	-0.09	0	0	43	0	0	0	0	0	0	2019-02-14T01:00:00.000	1970-01-01T16:52:04.529	157	0	0	0	43	0	0	0	0	0	1	0.045	100	0	44	0	0	0
0	0	0	0	0	0	0	1	0	0	0	269.184	0	0	0	3.4	103.4	0	0	0	-0.09	0	0	43	0	0	0	0	0	0	2019-02-14T01:00:00.000	1970-01-01T16:52:04.649	157	0	0	0	43	0	0	0	0	0	1	0.045	100	0	44	0	0	0
0	0	0	0	0	0	0	1	0	0	0	269.184	0	0	0	3.4	103.4	0	0	0	-0.09	0	0	43	0	0	0	0	0	0	2019-02-14T01:00:00.000	1970-01-01T16:52:04.649	157	0	0	0	43	0	0	0	0	0	1	0.045	100	0	44	0	0	0
0	0	0	0	0	0	0	1	0	0	0	269.184	0	0	0	3.4	103.4	0	0	0	-0.09	0	0	43	0	0	0	0	0	0	2019-02-14T01:00:00.000	1970-01-01T16:52:04.649	157	0	0	0	43	0	0	0	0	0	1	0.045	100	0	44	0	0	0
0	0	0	0	0	0	0	1	0	0	0	269.184	0	0	0	3.4	103.4	0	0	0	-0.09	0	0	43	0	0	0	0	0	0	2019-02-14T01:00:00.000	1970-01-01T16:52:04.649	157	0	0	0	43	0	0	0	0	0	1	0.045	100	0	44	0	0	0
0	0	0	0	0	0	0	1	0	0	0	269.184	0	0	0	3.4	103.4	0	0	0	-0.09	0	0	43	0	0	0	0	0	0	2019-02-14T01:00:00.000	1970-01-01T16:52:04.649	157	0	0	0	43	0	0	0	0	0	1	0.045	100	0	44	0	0	0
0	0	0	0	0	0	0	1	0	0	0	269.184	0	0	0	3.4	103.4	0	0	0	-0.09	0	0	43	0	0	0	0	0	0	2019-02-14T01:00:00.000	1970-01-01T16:52:04.769	157	0	0	0	43	0	0	0	0	0	1	0.052	100	0	44	0	0	0
0	0	0	0	0	0	0	1	0	0	0	269.184	0	0	0	3.4	103.4	0	0	0	-0.09	0	0	43	0	0	0	0	0	0	2019-02-14T01:00:00.000	1970-01-01T16:52:04.769	157	0	0	0	43	0	0	0	0	0	1	0.052	100	0	44	0	0	0
0	0	0	0	0	0	0	1	0	0	0	269.184	0	0	0	3.4	103.4	0	0	0	-0.09	0	0	43	0	0	0	0	0	0	2019-02-14T01:00:00.000	1970-01-01T16:52:04.769	157	0	0	0	43	0	0	0	0	0	1	0.052	100	0	44	0	0	0
0	0	0	0	0	0	0	1	0	0	0	269.184	0	0	0	3.4	103.4	0	0	0	-0.09	0	0	43	0	0	0	0	0	0	2019-02-14T01:00:00.000	1970-01-01T16:52:04.769	157	0	0	0	43	0	0	0	0	0	1	0.052	100	0	44	0	0	0
0	0	0	0	0	0	0	1	0	0	0	269.184	0	0	0	3.4	103.4	0	0	0	-0.09	0	0	43	0	0	0	0	0	0	2019-02-14T01:00:00.000	1970-01-01T16:52:04.769	157	0	0	0	43	0	0	0	0	0	1	0.052	100	0	44	0	0	0
0	0	0	0	0	0	0	1	0	0	0	269.184	0	0	0	3.4	103.4	0	0	0	-0.075	0	0	43	0	0	0	0	0	0	2019-02-14T01:00:00.000	1970-01-01T16:52:04.889	157	0	0	0	43	0	0	0	0	0	1	0.045	100	0	44	0	0	0
0	0	0	0	0	0	0	1	0	0	0	269.184	0	0	0	3.4	103.4	0	0	0	-0.075	0	0	43	0	0	0	0	0	0	2019-02-14T01:00:00.000	1970-01-01T16:52:04.889	157	0	0	0	43	0	0	0	0	0	1	0.045	100	0	44	0	0	0
0	0	0	0	0	0	0	1	0	0	0	269.184	0	0	0	3.4	103.4	0	0	0	-0.075	0	0	43	0	0	0	0	0	0	2019-02-14T01:00:00.000	1970-01-01T16:52:04.889	157	0	0	0	43	0	0	0	0	0	1	0.045	100	0	44	0	0	0
0	0	0	0	0	0	0	1	0	0	0	269.184	0	0	0	3.4	103.4	0	0	0	-0.075	0	0	43	0	0	0	0	0	0	2019-02-14T01:00:00.000	1970-01-01T16:52:04.889	157	0	0	0	43	0	0	0	0	0	1	0.045	100	0	44	0	0	0
0	0	0	0	0	0	0	1	0	0	0	269.184	0	0	0	3.4	103.4	0	0	0	-0.075	0	0	43	0	0	0	0	0	0	2019-02-14T01:00:00.000	1970-01-01T16:52:04.889	157	0	0	0	43	0	0	0	0	0	1	0.045	100	0	44	0	0	0
0	0	0	0	0	0	0	1	0	0	0	269.184	0	0	0	3.4	103.4	0	0	0	-0.075	0	0	43	0	0	0	0	0	0	2019-02-14T01:00:00.000	1970-01-01T16:52:04.999	157	0	0	0	43	0	0	0	0	0	1	0.045	100	0	44	0	0	0
0	0	0	0	0	0	0	1	0	0	0	269.184	0	0	0	3.4	103.4	0	0	0	-0.075	0	0	43	0	0	0	0	0	0	2019-02-14T01:00:00.000	1970-01-01T16:52:04.999	157	0	0	0	43	0	0	0	0	0	1	0.045	100	0	44	0	0	0
0	0	0	0	0	0	0	1	0	0	0	269.184	0	0	0	3.4	103.4	0	0	0	-0.075	0	0	43	0	0	0	0	0	0	2019-02-14T01:00:00.000	1970-01-01T16:52:04.999	157	0	0	0	43	0	0	0	0	0	1	0.045	100	0	44	0	0	0
0	0	0	0	0	0	0	1	0	0	0	269.184	0	0	0	3.4	103.4	0	0	0	-0.075	0	0	43	0	0	0	0	0	0	2019-02-14T01:00:00.000	1970-01-01T16:52:04.999	157	0	0	0	43	0	0	0	0	0	1	0.045	100	0	44	0	0	0
0	0	0	0	0	0	0	1	0	0	0	269.184	0	0	0	3.4	103.4	0	0	0	-0.075	0	0	43	0	0	0	0	0	0	2019-02-14T01:00:00.000	1970-01-01T16:52:04.999	157	0	0	0	43	0	0	0	0	0	1	0.045	100	0	44	0	0	0
0	0	0	0	0	0	0	1	0	0	0	269.184	0	0	0	3.4	103.4	0	0	0	-0.075	0	0	43	0	0	0	0	0	0	2019-02-14T01:00:00.000	1970-01-01T16:52:05.119	157	0	0	0	43	0	0	0	0	0	1	0.045	100	0	44	0	0	0
0	0	0	0	0	0	0	1	0	0	0	269.184	0	0	0	3.4	103.4	0	0	0	-0.075	0	0	43	0	0	0	0	0	0	2019-02-14T01:00:00.000	1970-01-01T16:52:05.119	157	0	0	0	43	0	0	0	0	0	1	0.045	100	0	44	0	0	0
0	0	0	0	0	0	0	1	0	0	0	269.184	0	0	0	3.4	103.4	0	0	0	-0.075	0	0	43	0	0	0	0	0	0	2019-02-14T01:00:00.000	1970-01-01T16:52:05.119	157	0	0	0	43	0	0	0	0	0	1	0.045	100	0	44	0	0	0
0	0	0	0	0	0	0	1	0	0	0	269.184	0	0	0	3.4	103.4	0	0	0	-0.075	0	0	43	0	0	0	0	0	0	2019-02-14T01:00:00.000	1970-01-01T16:52:05.119	157	0	0	0	43	0	0	0	0	0	1	0.045	100	0	44	0	0	0
0	0	0	0	0	0	0	1	0	0	0	269.184	0	0	0	3.4	103.4	0	0	0	-0.075	0	0	43	0	0	0	0	0	0	2019-02-14T01:00:00.000	1970-01-01T16:52:05.119	157	0	0	0	43	0	0	0	0	0	1	0.045	100	0	44	0	0	0
0	0	0	0	0	0	0	1	0	0	0	269.184	0	0	0	3.4	103.4	0	0	0	-0.09	0	0	43	0	0	0	0	0	0	2019-02-14T01:00:00.000	1970-01-01T16:52:05.239	157	0	0	0	43	0	0	0	0	0	1	0.045	100	0	44	0	0	0
0	0	0	0	0	0	0	1	0	0	0	269.184	0	0	0	3.4	103.4	0	0	0	-0.09	0	0	43	0	0	0	0	0	0	2019-02-14T01:00:00.000	1970-01-01T16:52:05.239	157	0	0	0	43	0	0	0	0	0	1	0.045	100	0	44	0	0	0
0	0	0	0	0	0	0	1	0	0	0	269.184	0	0	0	3.4	103.4	0	0	0	-0.09	0	0	43	0	0	0	0	0	0	2019-02-14T01:00:00.000	1970-01-01T16:52:05.239	157	0	0	0	43	0	0	0	0	0	1	0.045	100	0	44	0	0	0
0	0	0	0	0	0	0	1	0	0	0	269.184	0	0	0	3.4	103.4	0	0	0	-0.09	0	0	43	0	0	0	0	0	0	2019-02-14T01:00:00.000	1970-01-01T16:52:05.239	157	0	0	0	43	0	0	0	0	0	1	0.045	100	0	44	0	0	0
0	0	0	0	0	0	0	1	0	0	0	269.184	0	0	0	3.4	103.4	0	0	0	-0.09	0	0	43	0	0	0	0	0	0	2019-02-14T01:00:00.000	1970-01-01T16:52:05.239	157	0	0	0	43	0	0	0	0	0	1	0.045	100	0	44	0	0	0
0	0	0	0	0	0	0	1	0	0	0	269.184	0	0	0	3.4	103.4	0	0	0	-0.08	0	0	43	0	0	0	0	0	0	2019-02-14T01:00:00.000	1970-01-01T16:52:05.349	157	0	0	0	43	0	0	0	0	0	1	0.052	100	0	44	0	0	0
0	0	0	0	0	0	0	1	0	0	0	269.184	0	0	0	3.4	103.4	0	0	0	-0.08	0	0	43	0	0	0	0	0	0	2019-02-14T01:00:00.000	1970-01-01T16:52:05.349	157	0	0	0	43	0	0	0	0	0	1	0.052	100	0	44	0	0	0
0	0	0	0	0	0	0	1	0	0	0	269.184	0	0	0	3.4	103.4	0	0	0	-0.08	0	0	43	0	0	0	0	0	0	2019-02-14T01:00:00.000	1970-01-01T16:52:05.349	157	0	0	0	43	0	0	0	0	0	1	0.052	100	0	44	0	0	0
0	0	0	0	0	0	0	1	0	0	0	269.184	0	0	0	3.4	103.4	0	0	0	-0.08	0	0	43	0	0	0	0	0	0	2019-02-14T01:00:00.000	1970-01-01T16:52:05.349	157	0	0	0	43	0	0	0	0	0	1	0.052	100	0	44	0	0	0
0	0	0	0	0	0	0	1	0	0	0	269.184	0	0	0	3.4	103.4	0	0	0	-0.08	0	0	43	0	0	0	0	0	0	2019-02-14T01:00:00.000	1970-01-01T16:52:05.349	157	0	0	0	43	0	0	0	0	0	1	0.052	100	0	44	0	0	0
0	0	0	0	0	0	0	1	0	0	0	269.184	0	0	0	3.4	103.4	0	0	0	-0.08	0	0	43	0	0	0	0	0	0	2019-02-14T01:00:00.000	1970-01-01T16:52:05.469	157	0	0	0	43	0	0	0	0	0	1	0.045	100	0	44	0	0	0
0	0	0	0	0	0	0	1	0	0	0	269.184	0	0	0	3.4	103.4	0	0	0	-0.08	0	0	43	0	0	0	0	0	0	2019-02-14T01:00:00.000	1970-01-01T16:52:05.469	157	0	0	0	43	0	0	0	0	0	1	0.045	100	0	44	0	0	0
0	0	0	0	0	0	0	1	0	0	0	269.184	0	0	0	3.4	103.4	0	0	0	-0.08	0	0	43	0	0	0	0	0	0	2019-02-14T01:00:00.000	1970-01-01T16:52:05.469	157	0	0	0	43	0	0	0	0	0	1	0.045	100	0	44	0	0	0
0	0	0	0	0	0	0	1	0	0	0	269.184	0	0	0	3.4	103.4	0	0	0	-0.08	0	0	43	0	0	0	0	0	0	2019-02-14T01:00:00.000	1970-01-01T16:52:05.469	157	0	0	0	43	0	0	0	0	0	1	0.045	100	0	44	0	0	0
0	0	0	0	0	0	0	1	0	0	0	269.184	0	0	0	3.4	103.4	0	0	0	-0.08	0	0	43	0	0	0	0	0	0	2019-02-14T01:00:00.000	1970-01-01T16:52:05.469	157	0	0	0	43	0	0	0	0	0	1	0.045	100	0	44	0	0	0
0	0	0	0	0	0	0	1	0	0	0	269.184	0	0	0	3.4	103.4	0	0	0	-0.08	0	0	43	0	0	0	0	0	0	2019-02-14T01:00:00.000	1970-01-01T16:52:05.589	157	0	0	0	43	0	0	0	0	0	1	0.045	100	0	44	0	0	0
0	0	0	0	0	0	0	1	0	0	0	269.184	0	0	0	3.4	103.4	0	0	0	-0.08	0	0	43	0	0	0	0	0	0	2019-02-14T01:00:00.000	1970-01-01T16:52:05.589	157	0	0	0	43	0	0	0	0	0	1	0.045	100	0	44	0	0	0
0	0	0	0	0	0	0	1	0	0	0	269.184	0	0	0	3.4	103.4	0	0	0	-0.08	0	0	43	0	0	0	0	0	0	2019-02-14T01:00:00.000	1970-01-01T16:52:05.589	157	0	0	0	43	0	0	0	0	0	1	0.045	100	0	44	0	0	0
0	0	0	0	0	0	0	1	0	0	0	269.184	0	0	0	3.4	103.4	0	0	0	-0.08	0	0	43	0	0	0	0	0	0	2019-02-14T01:00:00.000	1970-01-01T16:52:05.589	157	0	0	0	43	0	0	0	0	0	1	0.045	100	0	44	0	0	0
0	0	0	0	0	0	0	1	0	0	0	269.184	0	0	0	3.4	103.4	0	0	0	-0.08	0	0	43	0	0	0	0	0	0	2019-02-14T01:00:00.000	1970-01-01T16:52:05.589	157	0	0	0	43	0	0	0	0	0	1	0.045	100	0	44	0	0	0
0	0	0	0	0	0	0	1	0	0	0	269.184	0	0	0	3.4	103.4	0	0	0	-0.095	0	0	43	0	0	0	0	0	0	2019-02-14T01:00:00.000	1970-01-01T16:52:05.699	157	0	0	0	43	0	0	0	0	0	1	0.045	100	0	44	0	0	0
0	0	0	0	0	0	0	1	0	0	0	269.184	0	0	0	3.4	103.4	0	0	0	-0.095	0	0	43	0	0	0	0	0	0	2019-02-14T01:00:00.000	1970-01-01T16:52:05.699	157	0	0	0	43	0	0	0	0	0	1	0.045	100	0	44	0	0	0
0	0	0	0	0	0	0	1	0	0	0	269.184	0	0	0	3.4	103.4	0	0	0	-0.095	0	0	43	0	0	0	0	0	0	2019-02-14T01:00:00.000	1970-01-01T16:52:05.699	157	0	0	0	43	0	0	0	0	0	1	0.045	100	0	44	0	0	0
0	0	0	0	0	0	0	1	0	0	0	269.184	0	0	0	3.4	103.4	0	0	0	-0.095	0	0	43	0	0	0	0	0	0	2019-02-14T01:00:00.000	1970-01-01T16:52:05.699	157	0	0	0	43	0	0	0	0	0	1	0.045	100	0	44	0	0	0
0	0	0	0	0	0	0	1	0	0	0	269.184	0	0	0	3.4	103.4	0	0	0	-0.095	0	0	43	0	0	0	0	0	0	2019-02-14T01:00:00.000	1970-01-01T16:52:05.699	157	0	0	0	43	0	0	0	0	0	1	0.045	100	0	44	0	0	0
0	0	0	0	0	0	0	1	0	0	0	269.184	0	0	0	3.4	103.4	0	0	0	-0.09	0	0	43	0	0	0	0	0	0	2019-02-14T01:00:00.000	1970-01-01T16:52:05.819	157	0	0	0	43	0	0	0	0	0	1	0.045	100	0	44	0	0	0
0	0	0	0	0	0	0	1	0	0	0	269.184	0	0	0	3.4	103.4	0	0	0	-0.09	0	0	43	0	0	0	0	0	0	2019-02-14T01:00:00.000	1970-01-01T16:52:05.819	157	0	0	0	43	0	0	0	0	0	1	0.045	100	0	44	0	0	0
0	0	0	0	0	0	0	1	0	0	0	269.184	0	0	0	3.4	103.4	0	0	0	-0.09	0	0	43	0	0	0	0	0	0	2019-02-14T01:00:00.000	1970-01-01T16:52:05.819	157	0	0	0	43	0	0	0	0	0	1	0.045	100	0	44	0	0	0
0	0	0	0	0	0	0	1	0	0	0	269.184	0	0	0	3.4	103.4	0	0	0	-0.09	0	0	43	0	0	0	0	0	0	2019-02-14T01:00:00.000	1970-01-01T16:52:05.819	157	0	0	0	43	0	0	0	0	0	1	0.045	100	0	44	0	0	0
0	0	0	0	0	0	0	1	0	0	0	269.184	0	0	0	3.4	103.4	0	0	0	-0.09	0	0	43	0	0	0	0	0	0	2019-02-14T01:00:00.000	1970-01-01T16:52:05.819	157	0	0	0	43	0	0	0	0	0	1	0.045	100	0	44	0	0	0
0	0	0	0	0	0	0	1	0	0	0	269.184	0	0	0	3.4	103.4	0	0	0	-0.085	0	0	43	0	0	0	0	0	0	2019-02-14T01:00:00.000	1970-01-01T16:52:05.939	157	0	0	0	43	0	0	0	0	0	1	0.037	100	0	44	0	0	0
0	0	0	0	0	0	0	1	0	0	0	269.184	0	0	0	3.4	103.4	0	0	0	-0.085	0	0	43	0	0	0	0	0	0	2019-02-14T01:00:00.000	1970-01-01T16:52:05.939	157	0	0	0	43	0	0	0	0	0	1	0.037	100	0	44	0	0	0
0	0	0	0	0	0	0	1	0	0	0	269.184	0	0	0	3.4	103.4	0	0	0	-0.085	0	0	43	0	0	0	0	0	0	2019-02-14T01:00:00.000	1970-01-01T16:52:05.939	157	0	0	0	43	0	0	0	0	0	1	0.037	100	0	44	0	0	0
0	0	0	0	0	0	0	1	0	0	0	269.184	0	0	0	3.4	103.4	0	0	0	-0.085	0	0	43	0	0	0	0	0	0	2019-02-14T01:00:00.000	1970-01-01T16:52:05.939	157	0	0	0	43	0	0	0	0	0	1	0.037	100	0	44	0	0	0
0	0	0	0	0	0	0	1	0	0	0	269.184	0	0	0	3.4	103.4	0	0	0	-0.085	0	0	43	0	0	0	0	0	0	2019-02-14T01:00:00.000	1970-01-01T16:52:05.939	157	0	0	0	43	0	0	0	0	0	1	0.037	100	0	44	0	0	0
0	0	0	0	0	0	0	1	0	0	0	269.184	0	0	0	3.4	103.4	0	0	0	-0.08	0	0	43	0	0	0	0	0	0	2019-02-14T01:00:00.000	1970-01-01T16:52:06.049	157	0	0	0	43	0	0	0	0	0	1	0.045	100	0	44	0	0	0
0	0	0	0	0	0	0	1	0	0	0	269.184	0	0	0	3.4	103.4	0	0	0	-0.08	0	0	43	0	0	0	0	0	0	2019-02-14T01:00:00.000	1970-01-01T16:52:06.049	157	0	0	0	43	0	0	0	0	0	1	0.045	100	0	44	0	0	0
0	0	0	0	0	0	0	1	0	0	0	269.184	0	0	0	3.4	103.4	0	0	0	-0.08	0	0	43	0	0	0	0	0	0	2019-02-14T01:00:00.000	1970-01-01T16:52:06.049	157	0	0	0	43	0	0	0	0	0	1	0.045	100	0	44	0	0	0
0	0	0	0	0	0	0	1	0	0	0	269.184	0	0	0	3.4	103.4	0	0	0	-0.08	0	0	43	0	0	0	0	0	0	2019-02-14T01:00:00.000	1970-01-01T16:52:06.049	157	0	0	0	43	0	0	0	0	0	1	0.045	100	0	44	0	0	0
0	0	0	0	0	0	0	1	0	0	0	269.184	0	0	0	3.4	103.4	0	0	0	-0.08	0	0	43	0	0	0	0	0	0	2019-02-14T01:00:00.000	1970-01-01T16:52:06.049	157	0	0	0	43	0	0	0	0	0	1	0.045	100	0	44	0	0	0
0	0	0	0	0	0	0	1	0	0	0	269.184	0	0	0	3.4	103.4	0	0	0	-0.08	0	0	43	0	0	0	0	0	0	2019-02-14T01:00:00.000	1970-01-01T16:52:06.169	157	0	0	0	43	0	0	0	0	0	1	0.052	100	0	44	0	0	0
0	0	0	0	0	0	0	1	0	0	0	269.184	0	0	0	3.4	103.4	0	0	0	-0.08	0	0	43	0	0	0	0	0	0	2019-02-14T01:00:00.000	1970-01-01T16:52:06.169	157	0	0	0	43	0	0	0	0	0	1	0.052	100	0	44	0	0	0
0	0	0	0	0	0	0	1	0	0	0	269.184	0	0	0	3.4	103.4	0	0	0	-0.08	0	0	43	0	0	0	0	0	0	2019-02-14T01:00:00.000	1970-01-01T16:52:06.169	157	0	0	0	43	0	0	0	0	0	1	0.052	100	0	44	0	0	0
0	0	0	0	0	0	0	1	0	0	0	269.184	0	0	0	3.4	103.4	0	0	0	-0.08	0	0	43	0	0	0	0	0	0	2019-02-14T01:00:00.000	1970-01-01T16:52:06.169	157	0	0	0	43	0	0	0	0	0	1	0.052	100	0	44	0	0	0
0	0	0	0	0	0	0	1	0	0	0	269.184	0	0	0	3.4	103.4	0	0	0	-0.08	0	0	43	0	0	0	0	0	0	2019-02-14T01:00:00.000	1970-01-01T16:52:06.169	157	0	0	0	43	0	0	0	0	0	1	0.052	100	0	44	0	0	0
0	0	0	0	0	0	0	1	0	0	0	269.184	0	0	0	3.4	103.4	0	0	0	-0.08	0	0	43	0	0	0	0	0	0	2019-02-14T01:00:00.000	1970-01-01T16:52:06.289	157	0	0	0	43	0	0	0	0	0	1	0.037	100	0	44	0	0	0
0	0	0	0	0	0	0	1	0	0	0	269.184	0	0	0	3.4	103.4	0	0	0	-0.08	0	0	43	0	0	0	0	0	0	2019-02-14T01:00:00.000	1970-01-01T16:52:06.289	157	0	0	0	43	0	0	0	0	0	1	0.037	100	0	44	0	0	0
0	0	0	0	0	0	0	1	0	0	0	269.184	0	0	0	3.4	103.4	0	0	0	-0.08	0	0	43	0	0	0	0	0	0	2019-02-14T01:00:00.000	1970-01-01T16:52:06.289	157	0	0	0	43	0	0	0	0	0	1	0.037	100	0	44	0	0	0
0	0	0	0	0	0	0	1	0	0	0	269.184	0	0	0	3.4	103.4	0	0	0	-0.08	0	0	43	0	0	0	0	0	0	2019-02-14T01:00:00.000	1970-01-01T16:52:06.289	157	0	0	0	43	0	0	0	0	0	1	0.037	100	0	44	0	0	0
0	0	0	0	0	0	0	1	0	0	0	269.184	0	0	0	3.4	103.4	0	0	0	-0.08	0	0	43	0	0	0	0	0	0	2019-02-14T01:00:00.000	1970-01-01T16:52:06.289	157	0	0	0	43	0	0	0	0	0	1	0.037	100	0	44	0	0	0
0	0	0	0	0	0	0	1	0	0	0	269.184	0	0	0	3.4	103.4	0	0	0	-0.08	0	0	43	0	0	0	0	0	0	2019-02-14T01:00:00.000	1970-01-01T16:52:06.399	157	0	0	0	43	0	0	0	0	0	1	0.037	100	0	44	0	0	0
0	0	0	0	0	0	0	1	0	0	0	269.184	0	0	0	3.4	103.4	0	0	0	-0.08	0	0	43	0	0	0	0	0	0	2019-02-14T01:00:00.000	1970-01-01T16:52:06.399	157	0	0	0	43	0	0	0	0	0	1	0.037	100	0	44	0	0	0
0	0	0	0	0	0	0	1	0	0	0	269.184	0	0	0	3.4	103.4	0	0	0	-0.08	0	0	43	0	0	0	0	0	0	2019-02-14T01:00:00.000	1970-01-01T16:52:06.399	157	0	0	0	43	0	0	0	0	0	1	0.037	100	0	44	0	0	0
0	0	0	0	0	0	0	1	0	0	0	269.184	0	0	0	3.4	103.4	0	0	0	-0.08	0	0	43	0	0	0	0	0	0	2019-02-14T01:00:00.000	1970-01-01T16:52:06.399	157	0	0	0	43	0	0	0	0	0	1	0.037	100	0	44	0	0	0
0	0	0	0	0	0	0	1	0	0	0	269.184	0	0	0	3.4	103.4	0	0	0	-0.08	0	0	43	0	0	0	0	0	0	2019-02-14T01:00:00.000	1970-01-01T16:52:06.399	157	0	0	0	43	0	0	0	0	0	1	0.037	100	0	44	0	0	0
0	0	0	0	0	0	0	1	0	0	0	269.184	0	0	0	3.4	103.4	0	0	0	-0.09	0	0	43	0	0	0	0	0	0	2019-02-14T01:00:00.000	1970-01-01T16:52:06.519	157	0	0	0	43	0	0	0	0	0	1	0.037	100	0	44	0	0	0
0	0	0	0	0	0	0	1	0	0	0	269.184	0	0	0	3.4	103.4	0	0	0	-0.09	0	0	43	0	0	0	0	0	0	2019-02-14T01:00:00.000	1970-01-01T16:52:06.519	157	0	0	0	43	0	0	0	0	0	1	0.037	100	0	44	0	0	0
0	0	0	0	0	0	0	1	0	0	0	269.184	0	0	0	3.4	103.4	0	0	0	-0.09	0	0	43	0	0	0	0	0	0	2019-02-14T01:00:00.000	1970-01-01T16:52:06.519	157	0	0	0	43	0	0	0	0	0	1	0.037	100	0	44	0	0	0
0	0	0	0	0	0	0	1	0	0	0	269.184	0	0	0	3.4	103.4	0	0	0	-0.09	0	0	43	0	0	0	0	0	0	2019-02-14T01:00:00.000	1970-01-01T16:52:06.519	157	0	0	0	43	0	0	0	0	0	1	0.037	100	0	44	0	0	0
0	0	0	0	0	0	0	1	0	0	0	269.184	0	0	0	3.4	103.4	0	0	0	-0.09	0	0	43	0	0	0	0	0	0	2019-02-14T01:00:00.000	1970-01-01T16:52:06.519	157	0	0	0	43	0	0	0	0	0	1	0.037	100	0	44	0	0	0
0	0	0	0	0	0	0	1	0	0	0	269.184	0	0	0	3.4	103.4	0	0	0	-0.08	0	0	43	0	0	0	0	0	0	2019-02-14T01:00:00.000	1970-01-01T16:52:06.639	157	0	0	0	43	0	0	0	0	0	1	0.03	100	0	44	0	0	0
0	0	0	0	0	0	0	1	0	0	0	269.184	0	0	0	3.4	103.4	0	0	0	-0.08	0	0	43	0	0	0	0	0	0	2019-02-14T01:00:00.000	1970-01-01T16:52:06.639	157	0	0	0	43	0	0	0	0	0	1	0.03	100	0	44	0	0	0
0	0	0	0	0	0	0	1	0	0	0	269.184	0	0	0	3.4	103.4	0	0	0	-0.08	0	0	43	0	0	0	0	0	0	2019-02-14T01:00:00.000	1970-01-01T16:52:06.639	157	0	0	0	43	0	0	0	0	0	1	0.03	100	0	44	0	0	0
0	0	0	0	0	0	0	1	0	0	0	269.184	0	0	0	3.4	103.4	0	0	0	-0.08	0	0	43	0	0	0	0	0	0	2019-02-14T01:00:00.000	1970-01-01T16:52:06.639	157	0	0	0	43	0	0	0	0	0	1	0.03	100	0	44	0	0	0
0	0	0	0	0	0	0	1	0	0	0	269.184	0	0	0	3.4	103.4	0	0	0	-0.08	0	0	43	0	0	0	0	0	0	2019-02-14T01:00:00.000	1970-01-01T16:52:06.639	157	0	0	0	43	0	0	0	0	0	1	0.03	100	0	44	0	0	0
0	0	0	0	0	0	0	1	0	0	0	269.184	0	0	0	3.4	103.4	0	0	0	-0.09	0	0	43	0	0	0	0	0	0	2019-02-14T01:00:00.000	1970-01-01T16:52:06.759	157	0	0	0	43	0	0	0	0	0	1	0.045	100	0	44	0	0	0
0	0	0	0	0	0	0	1	0	0	0	269.184	0	0	0	3.4	103.4	0	0	0	-0.09	0	0	43	0	0	0	0	0	0	2019-02-14T01:00:00.000	1970-01-01T16:52:06.759	157	0	0	0	43	0	0	0	0	0	1	0.045	100	0	44	0	0	0
0	0	0	0	0	0	0	1	0	0	0	269.184	0	0	0	3.4	103.4	0	0	0	-0.09	0	0	43	0	0	0	0	0	0	2019-02-14T01:00:00.000	1970-01-01T16:52:06.759	157	0	0	0	43	0	0	0	0	0	1	0.045	100	0	44	0	0	0
0	0	0	0	0	0	0	1	0	0	0	269.184	0	0	0	3.4	103.4	0	0	0	-0.09	0	0	43	0	0	0	0	0	0	2019-02-14T01:00:00.000	1970-01-01T16:52:06.759	157	0	0	0	43	0	0	0	0	0	1	0.045	100	0	44	0	0	0
0	0	0	0	0	0	0	1	0	0	0	269.184	0	0	0	3.4	103.4	0	0	0	-0.09	0	0	43	0	0	0	0	0	0	2019-02-14T01:00:00.000	1970-01-01T16:52:06.759	157	0	0	0	43	0	0	0	0	0	1	0.045	100	0	44	0	0	0
0	0	0	0	0	0	0	1	0	0	0	269.184	0	0	0	3.4	103.4	0	0	0	-0.085	0	0	43	0	0	0	0	0	0	2019-02-14T01:00:00.000	1970-01-01T16:52:06.879	157	0	0	0	43	0	0	0	0	0	1	0.045	100	0	44	0	0	0
0	0	0	0	0	0	0	1	0	0	0	269.184	0	0	0	3.4	103.4	0	0	0	-0.085	0	0	43	0	0	0	0	0	0	2019-02-14T01:00:00.000	1970-01-01T16:52:06.879	157	0	0	0	43	0	0	0	0	0	1	0.045	100	0	44	0	0	0
0	0	0	0	0	0	0	1	0	0	0	269.184	0	0	0	3.4	103.4	0	0	0	-0.085	0	0	43	0	0	0	0	0	0	2019-02-14T01:00:00.000	1970-01-01T16:52:06.879	157	0	0	0	43	0	0	0	0	0	1	0.045	100	0	44	0	0	0
0	0	0	0	0	0	0	1	0	0	0	269.184	0	0	0	3.4	103.4	0	0	0	-0.085	0	0	43	0	0	0	0	0	0	2019-02-14T01:00:00.000	1970-01-01T16:52:06.879	157	0	0	0	43	0	0	0	0	0	1	0.045	100	0	44	0	0	0
0	0	0	0	0	0	0	1	0	0	0	269.184	0	0	0	3.4	103.4	0	0	0	-0.085	0	0	43	0	0	0	0	0	0	2019-02-14T01:00:00.000	1970-01-01T16:52:06.879	157	0	0	0	43	0	0	0	0	0	1	0.045	100	0	44	0	0	0
0	0	0	0	0	0	0	1	0	0	0	269.184	0	0	0	3.4	103.4	0	0	0	-0.09	0	0	43	0	0	0	0	0	0	2019-02-14T01:00:00.000	1970-01-01T16:52:06.989	157	0	0	0	43	0	0	0	0	0	1	0.045	100	0	44	0	0	0
0	0	0	0	0	0	0	1	0	0	0	269.184	0	0	0	3.4	103.4	0	0	0	-0.09	0	0	43	0	0	0	0	0	0	2019-02-14T01:00:00.000	1970-01-01T16:52:06.989	157	0	0	0	43	0	0	0	0	0	1	0.045	100	0	44	0	0	0
0	0	0	0	0	0	0	1	0	0	0	269.184	0	0	0	3.4	103.4	0	0	0	-0.09	0	0	43	0	0	0	0	0	0	2019-02-14T01:00:00.000	1970-01-01T16:52:06.989	157	0	0	0	43	0	0	0	0	0	1	0.045	100	0	44	0	0	0
0	0	0	0	0	0	0	1	0	0	0	269.184	0	0	0	3.4	103.4	0	0	0	-0.09	0	0	43	0	0	0	0	0	0	2019-02-14T01:00:00.000	1970-01-01T16:52:06.989	157	0	0	0	43	0	0	0	0	0	1	0.045	100	0	44	0	0	0
0	0	0	0	0	0	0	1	0	0	0	269.184	0	0	0	3.4	103.4	0	0	0	-0.09	0	0	43	0	0	0	0	0	0	2019-02-14T01:00:00.000	1970-01-01T16:52:06.989	157	0	0	0	43	0	0	0	0	0	1	0.045	100	0	44	0	0	0
0	0	0	0	0	0	0	1	0	0	0	269.184	0	0	0	3.4	103.4	0	0	0	-0.095	0	0	43	0	0	0	0	0	0	2019-02-14T01:00:00.000	1970-01-01T16:52:07.109	157	0	0	0	43	0	0	0	0	0	1	0.037	100	0	44	0	0	0
0	0	0	0	0	0	0	1	0	0	0	269.184	0	0	0	3.4	103.4	0	0	0	-0.095	0	0	43	0	0	0	0	0	0	2019-02-14T01:00:00.000	1970-01-01T16:52:07.109	157	0	0	0	43	0	0	0	0	0	1	0.037	100	0	44	0	0	0
0	0	0	0	0	0	0	1	0	0	0	269.184	0	0	0	3.4	103.4	0	0	0	-0.095	0	0	43	0	0	0	0	0	0	2019-02-14T01:00:00.000	1970-01-01T16:52:07.109	157	0	0	0	43	0	0	0	0	0	1	0.037	100	0	44	0	0	0
0	0	0	0	0	0	0	1	0	0	0	269.184	0	0	0	3.4	103.4	0	0	0	-0.095	0	0	43	0	0	0	0	0	0	2019-02-14T01:00:00.000	1970-01-01T16:52:07.109	157	0	0	0	43	0	0	0	0	0	1	0.037	100	0	44	0	0	0
0	0	0	0	0	0	0	1	0	0	0	269.184	0	0	0	3.4	103.4	0	0	0	-0.095	0	0	43	0	0	0	0	0	0	2019-02-14T01:00:00.000	1970-01-01T16:52:07.109	157	0	0	0	43	0	0	0	0	0	1	0.037	100	0	44	0	0	0
0	0	0	0	0	0	0	1	0	0	0	269.184	0	0	0	3.4	103.4	0	0	0	-0.095	0	0	43	0	0	0	0	0	0	2019-02-14T01:00:00.000	1970-01-01T16:52:07.229	157	0	0	0	43	0	0	0	0	0	1	0.037	100	0	44	0	0	0
0	0	0	0	0	0	0	1	0	0	0	269.184	0	0	0	3.4	103.4	0	0	0	-0.095	0	0	43	0	0	0	0	0	0	2019-02-14T01:00:00.000	1970-01-01T16:52:07.229	157	0	0	0	43	0	0	0	0	0	1	0.037	100	0	44	0	0	0
0	0	0	0	0	0	0	1	0	0	0	269.184	0	0	0	3.4	103.4	0	0	0	-0.095	0	0	43	0	0	0	0	0	0	2019-02-14T01:00:00.000	1970-01-01T16:52:07.229	157	0	0	0	43	0	0	0	0	0	1	0.037	100	0	44	0	0	0
0	0	0	0	0	0	0	1	0	0	0	269.184	0	0	0	3.4	103.4	0	0	0	-0.095	0	0	43	0	0	0	0	0	0	2019-02-14T01:00:00.000	1970-01-01T16:52:07.229	157	0	0	0	43	0	0	0	0	0	1	0.037	100	0	44	0	0	0
0	0	0	0	0	0	0	1	0	0	0	269.184	0	0	0	3.4	103.4	0	0	0	-0.095	0	0	43	0	0	0	0	0	0	2019-02-14T01:00:00.000	1970-01-01T16:52:07.229	157	0	0	0	43	0	0	0	0	0	1	0.037	100	0	44	0	0	0
0	0	0	0	0	0	0	1	0	0	0	269.184	0	0	0	3.4	103.4	0	0	0	-0.085	0	0	43	0	0	0	0	0	0	2019-02-14T01:00:00.000	1970-01-01T16:52:07.349	157	0	0	0	43	0	0	0	0	0	1	0.045	100	0	44	0	0	0
0	0	0	0	0	0	0	1	0	0	0	269.184	0	0	0	3.4	103.4	0	0	0	-0.085	0	0	43	0	0	0	0	0	0	2019-02-14T01:00:00.000	1970-01-01T16:52:07.349	157	0	0	0	43	0	0	0	0	0	1	0.045	100	0	44	0	0	0
0	0	0	0	0	0	0	1	0	0	0	269.184	0	0	0	3.4	103.4	0	0	0	-0.085	0	0	43	0	0	0	0	0	0	2019-02-14T01:00:00.000	1970-01-01T16:52:07.349	157	0	0	0	43	0	0	0	0	0	1	0.045	100	0	44	0	0	0
0	0	0	0	0	0	0	1	0	0	0	269.184	0	0	0	3.4	103.4	0	0	0	-0.085	0	0	43	0	0	0	0	0	0	2019-02-14T01:00:00.000	1970-01-01T16:52:07.349	157	0	0	0	43	0	0	0	0	0	1	0.045	100	0	44	0	0	0
0	0	0	0	0	0	0	1	0	0	0	269.184	0	0	0	3.4	103.4	0	0	0	-0.085	0	0	43	0	0	0	0	0	0	2019-02-14T01:00:00.000	1970-01-01T16:52:07.349	157	0	0	0	43	0	0	0	0	0	1	0.045	100	0	44	0	0	0
0	0	0	0	0	0	0	1	0	0	0	269.184	0	0	0	3.4	103.4	0	0	0	-0.08	0	0	43	0	0	0	0	0	0	2019-02-14T01:00:00.000	1970-01-01T16:52:07.469	157	0	0	0	43	0	0	0	0	0	1	0.037	100	0	44	0	0	0
0	0	0	0	0	0	0	1	0	0	0	269.184	0	0	0	3.4	103.4	0	0	0	-0.08	0	0	43	0	0	0	0	0	0	2019-02-14T01:00:00.000	1970-01-01T16:52:07.469	157	0	0	0	43	0	0	0	0	0	1	0.037	100	0	44	0	0	0
0	0	0	0	0	0	0	1	0	0	0	269.184	0	0	0	3.4	103.4	0	0	0	-0.08	0	0	43	0	0	0	0	0	0	2019-02-14T01:00:00.000	1970-01-01T16:52:07.469	157	0	0	0	43	0	0	0	0	0	1	0.037	100	0	44	0	0	0
0	0	0	0	0	0	0	1	0	0	0	269.184	0	0	0	3.4	103.4	0	0	0	-0.08	0	0	43	0	0	0	0	0	0	2019-02-14T01:00:00.000	1970-01-01T16:52:07.469	157	0	0	0	43	0	0	0	0	0	1	0.037	100	0	44	0	0	0
0	0	0	0	0	0	0	1	0	0	0	269.184	0	0	0	3.4	103.4	0	0	0	-0.08	0	0	43	0	0	0	0	0	0	2019-02-14T01:00:00.000	1970-01-01T16:52:07.469	157	0	0	0	43	0	0	0	0	0	1	0.037	100	0	44	0	0	0
0	0	0	0	0	0	0	1	0	0	0	269.184	0	0	0	3.4	103.4	0	0	0	-0.075	0	0	43	0	0	0	0	0	0	2019-02-14T01:00:00.000	1970-01-01T16:52:07.589	157	0	0	0	43	0	0	0	0	0	1	0.045	100	0	44	0	0	0
0	0	0	0	0	0	0	1	0	0	0	269.184	0	0	0	3.4	103.4	0	0	0	-0.075	0	0	43	0	0	0	0	0	0	2019-02-14T01:00:00.000	1970-01-01T16:52:07.589	157	0	0	0	43	0	0	0	0	0	1	0.045	100	0	44	0	0	0
0	0	0	0	0	0	0	1	0	0	0	269.184	0	0	0	3.4	103.4	0	0	0	-0.075	0	0	43	0	0	0	0	0	0	2019-02-14T01:00:00.000	1970-01-01T16:52:07.589	157	0	0	0	43	0	0	0	0	0	1	0.045	100	0	44	0	0	0
0	0	0	0	0	0	0	1	0	0	0	269.184	0	0	0	3.4	103.4	0	0	0	-0.075	0	0	43	0	0	0	0	0	0	2019-02-14T01:00:00.000	1970-01-01T16:52:07.589	157	0	0	0	43	0	0	0	0	0	1	0.045	100	0	44	0	0	0
0	0	0	0	0	0	0	1	0	0	0	269.184	0	0	0	3.4	103.4	0	0	0	-0.075	0	0	43	0	0	0	0	0	0	2019-02-14T01:00:00.000	1970-01-01T16:52:07.589	157	0	0	0	43	0	0	0	0	0	1	0.045	100	0	44	0	0	0
0	0	0	0	0	0	0	1	0	0	0	269.184	0	0	0	3.4	103.4	0	0	0	-0.085	0	0	43	0	0	0	0	0	0	2019-02-14T01:00:00.000	1970-01-01T16:52:07.699	157	0	0	0	43	0	0	0	0	0	1	0.052	100	0	44	0	0	0
0	0	0	0	0	0	0	1	0	0	0	269.184	0	0	0	3.4	103.4	0	0	0	-0.085	0	0	43	0	0	0	0	0	0	2019-02-14T01:00:00.000	1970-01-01T16:52:07.699	157	0	0	0	43	0	0	0	0	0	1	0.052	100	0	44	0	0	0
0	0	0	0	0	0	0	1	0	0	0	269.184	0	0	0	3.4	103.4	0	0	0	-0.085	0	0	43	0	0	0	0	0	0	2019-02-14T01:00:00.000	1970-01-01T16:52:07.699	157	0	0	0	43	0	0	0	0	0	1	0.052	100	0	44	0	0	0
0	0	0	0	0	0	0	1	0	0	0	269.184	0	0	0	3.4	103.4	0	0	0	-0.085	0	0	43	0	0	0	0	0	0	2019-02-14T01:00:00.000	1970-01-01T16:52:07.699	157	0	0	0	43	0	0	0	0	0	1	0.052	100	0	44	0	0	0
0	0	0	0	0	0	0	1	0	0	0	269.184	0	0	0	3.4	103.4	0	0	0	-0.085	0	0	43	0	0	0	0	0	0	2019-02-14T01:00:00.000	1970-01-01T16:52:07.699	157	0	0	0	43	0	0	0	0	0	1	0.052	100	0	44	0	0	0
0	0	0	0	0	0	0	1	0	0	0	269.184	0	0	0	3.4	103.4	0	0	0	-0.085	0	0	43	0	0	0	0	0	0	2019-02-14T01:00:00.000	1970-01-01T16:52:07.819	157	0	0	0	43	0	0	0	0	0	1	0.045	100	0	44	0	0	0
0	0	0	0	0	0	0	1	0	0	0	269.184	0	0	0	3.4	103.4	0	0	0	-0.085	0	0	43	0	0	0	0	0	0	2019-02-14T01:00:00.000	1970-01-01T16:52:07.819	157	0	0	0	43	0	0	0	0	0	1	0.045	100	0	44	0	0	0
0	0	0	0	0	0	0	1	0	0	0	269.184	0	0	0	3.4	103.4	0	0	0	-0.085	0	0	43	0	0	0	0	0	0	2019-02-14T01:00:00.000	1970-01-01T16:52:07.819	157	0	0	0	43	0	0	0	0	0	1	0.045	100	0	44	0	0	0
0	0	0	0	0	0	0	1	0	0	0	269.184	0	0	0	3.4	103.4	0	0	0	-0.085	0	0	43	0	0	0	0	0	0	2019-02-14T01:00:00.000	1970-01-01T16:52:07.819	157	0	0	0	43	0	0	0	0	0	1	0.045	100	0	44	0	0	0
0	0	0	0	0	0	0	1	0	0	0	269.184	0	0	0	3.4	103.4	0	0	0	-0.085	0	0	43	0	0	0	0	0	0	2019-02-14T01:00:00.000	1970-01-01T16:52:07.819	157	0	0	0	43	0	0	0	0	0	1	0.045	100	0	44	0	0	0
0	0	0	0	0	0	0	1	0	0	0	269.184	0	0	0	3.4	103.4	0	0	0	-0.08	0	0	43	0	0	0	0	0	0	2019-02-14T01:00:00.000	1970-01-01T16:52:07.939	157	0	0	0	43	0	0	0	0	0	1	0.045	100	0	44	0	0	0
0	0	0	0	0	0	0	1	0	0	0	269.184	0	0	0	3.4	103.4	0	0	0	-0.08	0	0	43	0	0	0	0	0	0	2019-02-14T01:00:00.000	1970-01-01T16:52:07.939	157	0	0	0	43	0	0	0	0	0	1	0.045	100	0	44	0	0	0
0	0	0	0	0	0	0	1	0	0	0	269.184	0	0	0	3.4	103.4	0	0	0	-0.08	0	0	43	0	0	0	0	0	0	2019-02-14T01:00:00.000	1970-01-01T16:52:07.939	157	0	0	0	43	0	0	0	0	0	1	0.045	100	0	44	0	0	0
0	0	0	0	0	0	0	1	0	0	0	269.184	0	0	0	3.4	103.4	0	0	0	-0.08	0	0	43	0	0	0	0	0	0	2019-02-14T01:00:00.000	1970-01-01T16:52:07.939	157	0	0	0	43	0	0	0	0	0	1	0.045	100	0	44	0	0	0
0	0	0	0	0	0	0	1	0	0	0	269.184	0	0	0	3.4	103.4	0	0	0	-0.085	0	0	43	0	0	0	0	0	0	2019-02-14T01:00:00.000	1970-01-01T16:52:08.039	157	0	0	0	43	0	0	0	0	0	1	0.052	100	0	44	0	0	0
0	0	0	0	0	0	0	1	0	0	0	269.184	0	0	0	3.4	103.4	0	0	0	-0.085	0	0	43	0	0	0	0	0	0	2019-02-14T01:00:00.000	1970-01-01T16:52:08.039	157	0	0	0	43	0	0	0	0	0	1	0.052	100	0	44	0	0	0
0	0	0	0	0	0	0	1	0	0	0	269.184	0	0	0	3.4	103.4	0	0	0	-0.085	0	0	43	0	0	0	0	0	0	2019-02-14T01:00:00.000	1970-01-01T16:52:08.039	157	0	0	0	43	0	0	0	0	0	1	0.052	100	0	44	0	0	0
0	0	0	0	0	0	0	1	0	0	0	269.184	0	0	0	3.4	103.4	0	0	0	-0.085	0	0	43	0	0	0	0	0	0	2019-02-14T01:00:00.000	1970-01-01T16:52:08.039	157	0	0	0	43	0	0	0	0	0	1	0.052	100	0	44	0	0	0
0	0	0	0	0	0	0	1	0	0	0	269.184	0	0	0	3.4	103.4	0	0	0	-0.085	0	0	43	0	0	0	0	0	0	2019-02-14T01:00:00.000	1970-01-01T16:52:08.039	157	0	0	0	43	0	0	0	0	0	1	0.052	100	0	44	0	0	0
0	0	0	0	0	0	0	1	0	0	0	269.184	0	0	0	3.4	103.4	0	0	0	-0.08	0	0	43	0	0	0	0	0	0	2019-02-14T01:00:00.000	1970-01-01T16:52:08.159	157	0	0	0	43	0	0	0	0	0	1	0.037	100	0	44	0	0	0
0	0	0	0	0	0	0	1	0	0	0	269.184	0	0	0	3.4	103.4	0	0	0	-0.08	0	0	43	0	0	0	0	0	0	2019-02-14T01:00:00.000	1970-01-01T16:52:08.159	157	0	0	0	43	0	0	0	0	0	1	0.037	100	0	44	0	0	0
0	0	0	0	0	0	0	1	0	0	0	269.184	0	0	0	3.4	103.4	0	0	0	-0.08	0	0	43	0	0	0	0	0	0	2019-02-14T01:00:00.000	1970-01-01T16:52:08.159	157	0	0	0	43	0	0	0	0	0	1	0.037	100	0	44	0	0	0
0	0	0	0	0	0	0	1	0	0	0	269.184	0	0	0	3.4	103.4	0	0	0	-0.08	0	0	43	0	0	0	0	0	0	2019-02-14T01:00:00.000	1970-01-01T16:52:08.159	157	0	0	0	43	0	0	0	0	0	1	0.037	100	0	44	0	0	0
0	0	0	0	0	0	0	1	0	0	0	269.184	0	0	0	3.4	103.4	0	0	0	-0.08	0	0	43	0	0	0	0	0	0	2019-02-14T01:00:00.000	1970-01-01T16:52:08.159	157	0	0	0	43	0	0	0	0	0	1	0.037	100	0	44	0	0	0
0	0	0	0	0	0	0	1	0	0	0	269.184	0	0	0	3.4	103.4	0	0	0	-0.07	0	0	43	0	0	0	0	0	0	2019-02-14T01:00:00.000	1970-01-01T16:52:08.269	157	0	0	0	43	0	0	0	0	0	1	0.052	100	0	44	0	0	0
0	0	0	0	0	0	0	1	0	0	0	269.184	0	0	0	3.4	103.4	0	0	0	-0.07	0	0	43	0	0	0	0	0	0	2019-02-14T01:00:00.000	1970-01-01T16:52:08.269	157	0	0	0	43	0	0	0	0	0	1	0.052	100	0	44	0	0	0
0	0	0	0	0	0	0	1	0	0	0	269.184	0	0	0	3.4	103.4	0	0	0	-0.07	0	0	43	0	0	0	0	0	0	2019-02-14T01:00:00.000	1970-01-01T16:52:08.269	157	0	0	0	43	0	0	0	0	0	1	0.052	100	0	44	0	0	0
0	0	0	0	0	0	0	1	0	0	0	269.184	0	0	0	3.4	103.4	0	0	0	-0.07	0	0	43	0	0	0	0	0	0	2019-02-14T01:00:00.000	1970-01-01T16:52:08.269	157	0	0	0	43	0	0	0	0	0	1	0.052	100	0	44	0	0	0
0	0	0	0	0	0	0	1	0	0	0	269.184	0	0	0	3.4	103.4	0	0	0	-0.07	0	0	43	0	0	0	0	0	0	2019-02-14T01:00:00.000	1970-01-01T16:52:08.269	157	0	0	0	43	0	0	0	0	0	1	0.052	100	0	44	0	0	0
0	0	0	0	0	0	0	1	0	0	0	269.184	0	0	0	3.4	103.4	0	0	0	-0.085	0	0	43	0	0	0	0	0	0	2019-02-14T01:00:00.000	1970-01-01T16:52:08.389	157	0	0	0	43	0	0	0	0	0	1	0.052	100	0	44	0	0	0
0	0	0	0	0	0	0	1	0	0	0	269.184	0	0	0	3.4	103.4	0	0	0	-0.085	0	0	43	0	0	0	0	0	0	2019-02-14T01:00:00.000	1970-01-01T16:52:08.389	157	0	0	0	43	0	0	0	0	0	1	0.052	100	0	44	0	0	0
0	0	0	0	0	0	0	1	0	0	0	269.184	0	0	0	3.4	103.4	0	0	0	-0.085	0	0	43	0	0	0	0	0	0	2019-02-14T01:00:00.000	1970-01-01T16:52:08.389	157	0	0	0	43	0	0	0	0	0	1	0.052	100	0	44	0	0	0
0	0	0	0	0	0	0	1	0	0	0	269.184	0	0	0	3.4	103.4	0	0	0	-0.085	0	0	43	0	0	0	0	0	0	2019-02-14T01:00:00.000	1970-01-01T16:52:08.389	157	0	0	0	43	0	0	0	0	0	1	0.052	100	0	44	0	0	0
0	0	0	0	0	0	0	1	0	0	0	269.184	0	0	0	3.4	103.4	0	0	0	-0.085	0	0	43	0	0	0	0	0	0	2019-02-14T01:00:00.000	1970-01-01T16:52:08.389	157	0	0	0	43	0	0	0	0	0	1	0.052	100	0	44	0	0	0
0	0	0	0	0	0	0	1	0	0	0	269.184	0	0	0	3.4	103.4	0	0	0	-0.095	0	0	43	0	0	0	0	0	0	2019-02-14T01:00:00.000	1970-01-01T16:52:08.509	157	0	0	0	43	0	0	0	0	0	1	0.037	100	0	44	0	0	0
0	0	0	0	0	0	0	1	0	0	0	269.184	0	0	0	3.4	103.4	0	0	0	-0.095	0	0	43	0	0	0	0	0	0	2019-02-14T01:00:00.000	1970-01-01T16:52:08.509	157	0	0	0	43	0	0	0	0	0	1	0.037	100	0	44	0	0	0
0	0	0	0	0	0	0	1	0	0	0	269.184	0	0	0	3.4	103.4	0	0	0	-0.095	0	0	43	0	0	0	0	0	0	2019-02-14T01:00:00.000	1970-01-01T16:52:08.509	157	0	0	0	43	0	0	0	0	0	1	0.037	100	0	44	0	0	0
0	0	0	0	0	0	0	1	0	0	0	269.184	0	0	0	3.4	103.4	0	0	0	-0.095	0	0	43	0	0	0	0	0	0	2019-02-14T01:00:00.000	1970-01-01T16:52:08.509	157	0	0	0	43	0	0	0	0	0	1	0.037	100	0	44	0	0	0
0	0	0	0	0	0	0	1	0	0	0	269.184	0	0	0	3.4	103.4	0	0	0	-0.095	0	0	43	0	0	0	0	0	0	2019-02-14T01:00:00.000	1970-01-01T16:52:08.509	157	0	0	0	43	0	0	0	0	0	1	0.037	100	0	44	0	0	0
0	0	0	0	0	0	0	1	0	0	0	269.184	0	0	0	3.4	103.4	0	0	0	-0.085	0	0	43	0	0	0	0	0	0	2019-02-14T01:00:00.000	1970-01-01T16:52:08.619	157	0	0	0	43	0	0	0	0	0	1	0.037	100	0	44	0	0	0
0	0	0	0	0	0	0	1	0	0	0	269.184	0	0	0	3.4	103.4	0	0	0	-0.085	0	0	43	0	0	0	0	0	0	2019-02-14T01:00:00.000	1970-01-01T16:52:08.619	157	0	0	0	43	0	0	0	0	0	1	0.037	100	0	44	0	0	0
0	0	0	0	0	0	0	1	0	0	0	269.184	0	0	0	3.4	103.4	0	0	0	-0.085	0	0	43	0	0	0	0	0	0	2019-02-14T01:00:00.000	1970-01-01T16:52:08.619	157	0	0	0	43	0	0	0	0	0	1	0.037	100	0	44	0	0	0
0	0	0	0	0	0	0	1	0	0	0	269.184	0	0	0	3.4	103.4	0	0	0	-0.085	0	0	43	0	0	0	0	0	0	2019-02-14T01:00:00.000	1970-01-01T16:52:08.619	157	0	0	0	43	0	0	0	0	0	1	0.037	100	0	44	0	0	0
0	0	0	0	0	0	0	1	0	0	0	269.184	0	0	0	3.4	103.4	0	0	0	-0.085	0	0	43	0	0	0	0	0	0	2019-02-14T01:00:00.000	1970-01-01T16:52:08.619	157	0	0	0	43	0	0	0	0	0	1	0.037	100	0	44	0	0	0
0	0	0	0	0	0	0	1	0	0	0	269.184	0	0	0	3.4	103.4	0	0	0	-0.08	0	0	43	0	0	0	0	0	0	2019-02-14T01:00:00.000	1970-01-01T16:52:08.739	157	0	0	0	43	0	0	0	0	0	1	0.045	100	0	44	0	0	0
0	0	0	0	0	0	0	1	0	0	0	269.184	0	0	0	3.4	103.4	0	0	0	-0.08	0	0	43	0	0	0	0	0	0	2019-02-14T01:00:00.000	1970-01-01T16:52:08.739	157	0	0	0	43	0	0	0	0	0	1	0.045	100	0	44	0	0	0
0	0	0	0	0	0	0	1	0	0	0	269.184	0	0	0	3.4	103.4	0	0	0	-0.08	0	0	43	0	0	0	0	0	0	2019-02-14T01:00:00.000	1970-01-01T16:52:08.739	157	0	0	0	43	0	0	0	0	0	1	0.045	100	0	44	0	0	0
0	0	0	0	0	0	0	1	0	0	0	269.184	0	0	0	3.4	103.4	0	0	0	-0.08	0	0	43	0	0	0	0	0	0	2019-02-14T01:00:00.000	1970-01-01T16:52:08.739	157	0	0	0	43	0	0	0	0	0	1	0.045	100	0	44	0	0	0
0	0	0	0	0	0	0	1	0	0	0	269.184	0	0	0	3.4	103.4	0	0	0	-0.08	0	0	43	0	0	0	0	0	0	2019-02-14T01:00:00.000	1970-01-01T16:52:08.739	157	0	0	0	43	0	0	0	0	0	1	0.045	100	0	44	0	0	0
0	0	0	0	0	0	0	1	0	0	0	269.184	0	0	0	3.4	103.4	0	0	0	-0.09	0	0	43	0	0	0	0	0	0	2019-02-14T01:00:00.000	1970-01-01T16:52:08.859	157	0	0	0	43	0	0	0	0	0	1	0.045	100	0	44	0	0	0
0	0	0	0	0	0	0	1	0	0	0	269.184	0	0	0	3.4	103.4	0	0	0	-0.09	0	0	43	0	0	0	0	0	0	2019-02-14T01:00:00.000	1970-01-01T16:52:08.859	157	0	0	0	43	0	0	0	0	0	1	0.045	100	0	44	0	0	0
0	0	0	0	0	0	0	1	0	0	0	269.184	0	0	0	3.4	103.4	0	0	0	-0.09	0	0	43	0	0	0	0	0	0	2019-02-14T01:00:00.000	1970-01-01T16:52:08.859	157	0	0	0	43	0	0	0	0	0	1	0.045	100	0	44	0	0	0
0	0	0	0	0	0	0	1	0	0	0	269.184	0	0	0	3.4	103.4	0	0	0	-0.09	0	0	43	0	0	0	0	0	0	2019-02-14T01:00:00.000	1970-01-01T16:52:08.859	157	0	0	0	43	0	0	0	0	0	1	0.045	100	0	44	0	0	0
0	0	0	0	0	0	0	1	0	0	0	269.184	0	0	0	3.4	103.4	0	0	0	-0.09	0	0	43	0	0	0	0	0	0	2019-02-14T01:00:00.000	1970-01-01T16:52:08.859	157	0	0	0	43	0	0	0	0	0	1	0.045	100	0	44	0	0	0
0	0	0	0	0	0	0	1	0	0	0	269.184	0	0	0	3.4	103.4	0	0	0	-0.085	0	0	43	0	0	0	0	0	0	2019-02-14T01:00:00.000	1970-01-01T16:52:08.969	157	0	0	0	43	0	0	0	0	0	1	0.037	100	0	44	0	0	0
0	0	0	0	0	0	0	1	0	0	0	269.184	0	0	0	3.4	103.4	0	0	0	-0.085	0	0	43	0	0	0	0	0	0	2019-02-14T01:00:00.000	1970-01-01T16:52:08.969	157	0	0	0	43	0	0	0	0	0	1	0.037	100	0	44	0	0	0
0	0	0	0	0	0	0	1	0	0	0	269.184	0	0	0	3.4	103.4	0	0	0	-0.085	0	0	43	0	0	0	0	0	0	2019-02-14T01:00:00.000	1970-01-01T16:52:08.969	157	0	0	0	43	0	0	0	0	0	1	0.037	100	0	44	0	0	0
0	0	0	0	0	0	0	1	0	0	0	269.184	0	0	0	3.4	103.4	0	0	0	-0.085	0	0	43	0	0	0	0	0	0	2019-02-14T01:00:00.000	1970-01-01T16:52:08.969	157	0	0	0	43	0	0	0	0	0	1	0.037	100	0	44	0	0	0
0	0	0	0	0	0	0	1	0	0	0	269.184	0	0	0	3.4	103.4	0	0	0	-0.085	0	0	43	0	0	0	0	0	0	2019-02-14T01:00:00.000	1970-01-01T16:52:08.969	157	0	0	0	43	0	0	0	0	0	1	0.037	100	0	44	0	0	0
0	0	0	0	0	0	0	1	0	0	0	269.184	0	0	0	3.4	103.4	0	0	0	-0.075	0	0	43	0	0	0	0	0	0	2019-02-14T01:00:00.000	1970-01-01T16:52:09.089	157	0	0	0	43	0	0	0	0	0	1	0.045	100	0	44	0	0	0
0	0	0	0	0	0	0	1	0	0	0	269.184	0	0	0	3.4	103.4	0	0	0	-0.075	0	0	43	0	0	0	0	0	0	2019-02-14T01:00:00.000	1970-01-01T16:52:09.089	157	0	0	0	43	0	0	0	0	0	1	0.045	100	0	44	0	0	0
0	0	0	0	0	0	0	1	0	0	0	269.184	0	0	0	3.4	103.4	0	0	0	-0.075	0	0	43	0	0	0	0	0	0	2019-02-14T01:00:00.000	1970-01-01T16:52:09.089	157	0	0	0	43	0	0	0	0	0	1	0.045	100	0	44	0	0	0
0	0	0	0	0	0	0	1	0	0	0	269.184	0	0	0	3.4	103.4	0	0	0	-0.075	0	0	43	0	0	0	0	0	0	2019-02-14T01:00:00.000	1970-01-01T16:52:09.089	157	0	0	0	43	0	0	0	0	0	1	0.045	100	0	44	0	0	0
0	0	0	0	0	0	0	1	0	0	0	269.184	0	0	0	3.4	103.4	0	0	0	-0.075	0	0	43	0	0	0	0	0	0	2019-02-14T01:00:00.000	1970-01-01T16:52:09.089	157	0	0	0	43	0	0	0	0	0	1	0.045	100	0	44	0	0	0
0	0	0	0	0	0	0	1	0	0	0	269.184	0	0	0	3.4	103.4	0	0	0	-0.09	0	0	43	0	0	0	0	0	0	2019-02-14T01:00:00.000	1970-01-01T16:52:09.209	157	0	0	0	43	0	0	0	0	0	1	0.052	100	0	44	0	0	0
0	0	0	0	0	0	0	1	0	0	0	269.184	0	0	0	3.4	103.4	0	0	0	-0.09	0	0	43	0	0	0	0	0	0	2019-02-14T01:00:00.000	1970-01-01T16:52:09.209	157	0	0	0	43	0	0	0	0	0	1	0.052	100	0	44	0	0	0
0	0	0	0	0	0	0	1	0	0	0	269.184	0	0	0	3.4	103.4	0	0	0	-0.09	0	0	43	0	0	0	0	0	0	2019-02-14T01:00:00.000	1970-01-01T16:52:09.209	157	0	0	0	43	0	0	0	0	0	1	0.052	100	0	44	0	0	0
0	0	0	0	0	0	0	1	0	0	0	269.184	0	0	0	3.4	103.4	0	0	0	-0.09	0	0	43	0	0	0	0	0	0	2019-02-14T01:00:00.000	1970-01-01T16:52:09.209	157	0	0	0	43	0	0	0	0	0	1	0.052	100	0	44	0	0	0
0	0	0	0	0	0	0	1	0	0	0	269.184	0	0	0	3.4	103.4	0	0	0	-0.09	0	0	43	0	0	0	0	0	0	2019-02-14T01:00:00.000	1970-01-01T16:52:09.209	157	0	0	0	43	0	0	0	0	0	1	0.052	100	0	44	0	0	0
0	0	0	0	0	0	0	1	0	0	0	269.184	0	0	0	3.4	103.4	0	0	0	-0.095	0	0	43	0	0	0	0	0	0	2019-02-14T01:00:00.000	1970-01-01T16:52:09.329	157	0	0	0	43	0	0	0	0	0	1	0.037	100	0	44	0	0	0
0	0	0	0	0	0	0	1	0	0	0	269.184	0	0	0	3.4	103.4	0	0	0	-0.095	0	0	43	0	0	0	0	0	0	2019-02-14T01:00:00.000	1970-01-01T16:52:09.329	157	0	0	0	43	0	0	0	0	0	1	0.037	100	0	44	0	0	0
0	0	0	0	0	0	0	1	0	0	0	269.184	0	0	0	3.4	103.4	0	0	0	-0.095	0	0	43	0	0	0	0	0	0	2019-02-14T01:00:00.000	1970-01-01T16:52:09.329	157	0	0	0	43	0	0	0	0	0	1	0.037	100	0	44	0	0	0
0	0	0	0	0	0	0	1	0	0	0	269.184	0	0	0	3.4	103.4	0	0	0	-0.095	0	0	43	0	0	0	0	0	0	2019-02-14T01:00:00.000	1970-01-01T16:52:09.329	157	0	0	0	43	0	0	0	0	0	1	0.037	100	0	44	0	0	0
0	0	0	0	0	0	0	1	0	0	0	269.184	0	0	0	3.4	103.4	0	0	0	-0.095	0	0	43	0	0	0	0	0	0	2019-02-14T01:00:00.000	1970-01-01T16:52:09.329	157	0	0	0	43	0	0	0	0	0	1	0.037	100	0	44	0	0	0
0	0	0	0	0	0	0	1	0	0	0	269.184	0	0	0	3.4	103.4	0	0	0	-0.085	0	0	43	0	0	0	0	0	0	2019-02-14T01:00:00.000	1970-01-01T16:52:09.439	157	0	0	0	43	0	0	0	0	0	1	0.037	100	0	44	0	0	0
0	0	0	0	0	0	0	1	0	0	0	269.184	0	0	0	3.4	103.4	0	0	0	-0.085	0	0	43	0	0	0	0	0	0	2019-02-14T01:00:00.000	1970-01-01T16:52:09.439	157	0	0	0	43	0	0	0	0	0	1	0.037	100	0	44	0	0	0
0	0	0	0	0	0	0	1	0	0	0	269.184	0	0	0	3.4	103.4	0	0	0	-0.085	0	0	43	0	0	0	0	0	0	2019-02-14T01:00:00.000	1970-01-01T16:52:09.439	157	0	0	0	43	0	0	0	0	0	1	0.037	100	0	44	0	0	0
0	0	0	0	0	0	0	1	0	0	0	269.184	0	0	0	3.4	103.4	0	0	0	-0.085	0	0	43	0	0	0	0	0	0	2019-02-14T01:00:00.000	1970-01-01T16:52:09.439	157	0	0	0	43	0	0	0	0	0	1	0.037	100	0	44	0	0	0
0	0	0	0	0	0	0	1	0	0	0	269.184	0	0	0	3.4	103.4	0	0	0	-0.085	0	0	43	0	0	0	0	0	0	2019-02-14T01:00:00.000	1970-01-01T16:52:09.439	157	0	0	0	43	0	0	0	0	0	1	0.037	100	0	44	0	0	0
0	0	0	0	0	0	0	1	0	0	0	269.184	0	0	0	3.4	103.4	0	0	0	-0.08	0	0	43	0	0	0	0	0	0	2019-02-14T01:00:00.000	1970-01-01T16:52:09.559	157	0	0	0	43	0	0	0	0	0	1	0.037	100	0	44	0	0	0
0	0	0	0	0	0	0	1	0	0	0	269.184	0	0	0	3.4	103.4	0	0	0	-0.08	0	0	43	0	0	0	0	0	0	2019-02-14T01:00:00.000	1970-01-01T16:52:09.559	157	0	0	0	43	0	0	0	0	0	1	0.037	100	0	44	0	0	0
0	0	0	0	0	0	0	1	0	0	0	269.184	0	0	0	3.4	103.4	0	0	0	-0.08	0	0	43	0	0	0	0	0	0	2019-02-14T01:00:00.000	1970-01-01T16:52:09.559	157	0	0	0	43	0	0	0	0	0	1	0.037	100	0	44	0	0	0
0	0	0	0	0	0	0	1	0	0	0	269.184	0	0	0	3.4	103.4	0	0	0	-0.08	0	0	43	0	0	0	0	0	0	2019-02-14T01:00:00.000	1970-01-01T16:52:09.559	157	0	0	0	43	0	0	0	0	0	1	0.037	100	0	44	0	0	0
0	0	0	0	0	0	0	1	0	0	0	269.184	0	0	0	3.4	103.4	0	0	0	-0.08	0	0	43	0	0	0	0	0	0	2019-02-14T01:00:00.000	1970-01-01T16:52:09.559	157	0	0	0	43	0	0	0	0	0	1	0.037	100	0	44	0	0	0
0	0	0	0	0	0	0	1	0	0	0	269.184	0	0	0	3.4	103.4	0	0	0	-0.085	0	0	43	0	0	0	0	0	0	2019-02-14T01:00:00.000	1970-01-01T16:52:09.679	157	0	0	0	43	0	0	0	0	0	1	0.037	100	0	44	0	0	0
0	0	0	0	0	0	0	1	0	0	0	269.184	0	0	0	3.4	103.4	0	0	0	-0.085	0	0	43	0	0	0	0	0	0	2019-02-14T01:00:00.000	1970-01-01T16:52:09.679	157	0	0	0	43	0	0	0	0	0	1	0.037	100	0	44	0	0	0
0	0	0	0	0	0	0	1	0	0	0	269.184	0	0	0	3.4	103.4	0	0	0	-0.085	0	0	43	0	0	0	0	0	0	2019-02-14T01:00:00.000	1970-01-01T16:52:09.679	157	0	0	0	43	0	0	0	0	0	1	0.037	100	0	44	0	0	0
0	0	0	0	0	0	0	1	0	0	0	269.184	0	0	0	3.4	103.4	0	0	0	-0.085	0	0	43	0	0	0	0	0	0	2019-02-14T01:00:00.000	1970-01-01T16:52:09.679	157	0	0	0	43	0	0	0	0	0	1	0.037	100	0	44	0	0	0
0	0	0	0	0	0	0	1	0	0	0	269.184	0	0	0	3.4	103.4	0	0	0	-0.085	0	0	43	0	0	0	0	0	0	2019-02-14T01:00:00.000	1970-01-01T16:52:09.679	157	0	0	0	43	0	0	0	0	0	1	0.037	100	0	44	0	0	0
0	0	0	0	0	0	0	1	0	0	0	269.184	0	0	0	3.4	103.4	0	0	0	-0.095	0	0	43	0	0	0	0	0	0	2019-02-14T01:00:00.000	1970-01-01T16:52:09.789	157	0	0	0	43	0	0	0	0	0	1	0.045	100	0	44	0	0	0
0	0	0	0	0	0	0	1	0	0	0	269.184	0	0	0	3.4	103.4	0	0	0	-0.095	0	0	43	0	0	0	0	0	0	2019-02-14T01:00:00.000	1970-01-01T16:52:09.789	157	0	0	0	43	0	0	0	0	0	1	0.045	100	0	44	0	0	0
0	0	0	0	0	0	0	1	0	0	0	269.184	0	0	0	3.4	103.4	0	0	0	-0.095	0	0	43	0	0	0	0	0	0	2019-02-14T01:00:00.000	1970-01-01T16:52:09.789	157	0	0	0	43	0	0	0	0	0	1	0.045	100	0	44	0	0	0
0	0	0	0	0	0	0	1	0	0	0	269.184	0	0	0	3.4	103.4	0	0	0	-0.095	0	0	43	0	0	0	0	0	0	2019-02-14T01:00:00.000	1970-01-01T16:52:09.789	157	0	0	0	43	0	0	0	0	0	1	0.045	100	0	44	0	0	0
0	0	0	0	0	0	0	1	0	0	0	269.184	0	0	0	3.4	103.4	0	0	0	-0.095	0	0	43	0	0	0	0	0	0	2019-02-14T01:00:00.000	1970-01-01T16:52:09.789	157	0	0	0	43	0	0	0	0	0	1	0.045	100	0	44	0	0	0
0	0	0	0	0	0	0	1	0	0	0	269.184	0	0	0	3.4	103.4	0	0	0	-0.095	0	0	43	0	0	0	0	0	0	2019-02-14T01:00:00.000	1970-01-01T16:52:09.909	157	0	0	0	43	0	0	0	0	0	1	0.037	100	0	44	0	0	0
0	0	0	0	0	0	0	1	0	0	0	269.184	0	0	0	3.4	103.4	0	0	0	-0.095	0	0	43	0	0	0	0	0	0	2019-02-14T01:00:00.000	1970-01-01T16:52:09.909	157	0	0	0	43	0	0	0	0	0	1	0.037	100	0	44	0	0	0
0	0	0	0	0	0	0	1	0	0	0	269.184	0	0	0	3.4	103.4	0	0	0	-0.095	0	0	43	0	0	0	0	0	0	2019-02-14T01:00:00.000	1970-01-01T16:52:09.909	157	0	0	0	43	0	0	0	0	0	1	0.037	100	0	44	0	0	0
0	0	0	0	0	0	0	1	0	0	0	269.184	0	0	0	3.4	103.4	0	0	0	-0.095	0	0	43	0	0	0	0	0	0	2019-02-14T01:00:00.000	1970-01-01T16:52:09.909	157	0	0	0	43	0	0	0	0	0	1	0.037	100	0	44	0	0	0
0	0	0	0	0	0	0	1	0	0	0	269.184	0	0	0	3.4	103.4	0	0	0	-0.095	0	0	43	0	0	0	0	0	0	2019-02-14T01:00:00.000	1970-01-01T16:52:09.909	157	0	0	0	43	0	0	0	0	0	1	0.037	100	0	44	0	0	0
0	0	0	0	0	0	0	1	0	0	0	269.184	0	0	0	3.4	103.4	0	0	0	-0.08	0	0	43	0	0	0	0	0	0	2019-02-14T01:00:00.000	1970-01-01T16:52:10.029	157	0	0	0	43	0	0	0	0	0	1	0.037	100	0	44	0	0	0
0	0	0	0	0	0	0	1	0	0	0	269.184	0	0	0	3.4	103.4	0	0	0	-0.08	0	0	43	0	0	0	0	0	0	2019-02-14T01:00:00.000	1970-01-01T16:52:10.029	157	0	0	0	43	0	0	0	0	0	1	0.037	100	0	44	0	0	0
0	0	0	0	0	0	0	1	0	0	0	269.184	0	0	0	3.4	103.4	0	0	0	-0.08	0	0	43	0	0	0	0	0	0	2019-02-14T01:00:00.000	1970-01-01T16:52:10.029	157	0	0	0	43	0	0	0	0	0	1	0.037	100	0	44	0	0	0
0	0	0	0	0	0	0	1	0	0	0	269.184	0	0	0	3.4	103.4	0	0	0	-0.08	0	0	43	0	0	0	0	0	0	2019-02-14T01:00:00.000	1970-01-01T16:52:10.029	157	0	0	0	43	0	0	0	0	0	1	0.037	100	0	44	0	0	0
0	0	0	0	0	0	0	1	0	0	0	269.184	0	0	0	3.4	103.4	0	0	0	-0.08	0	0	43	0	0	0	0	0	0	2019-02-14T01:00:00.000	1970-01-01T16:52:10.029	157	0	0	0	43	0	0	0	0	0	1	0.037	100	0	44	0	0	0
0	0	0	0	0	0	0	1	0	0	0	269.184	0	0	0	3.4	103.4	0	0	0	-0.08	0	0	43	0	0	0	0	0	0	2019-02-14T01:00:00.000	1970-01-01T16:52:10.149	157	0	0	0	43	0	0	0	0	0	1	0.052	100	0	44	0	0	0
0	0	0	0	0	0	0	1	0	0	0	269.184	0	0	0	3.4	103.4	0	0	0	-0.08	0	0	43	0	0	0	0	0	0	2019-02-14T01:00:00.000	1970-01-01T16:52:10.149	157	0	0	0	43	0	0	0	0	0	1	0.052	100	0	44	0	0	0
0	0	0	0	0	0	0	1	0	0	0	269.184	0	0	0	3.4	103.4	0	0	0	-0.08	0	0	43	0	0	0	0	0	0	2019-02-14T01:00:00.000	1970-01-01T16:52:10.149	157	0	0	0	43	0	0	0	0	0	1	0.052	100	0	44	0	0	0
0	0	0	0	0	0	0	1	0	0	0	269.184	0	0	0	3.4	103.4	0	0	0	-0.08	0	0	43	0	0	0	0	0	0	2019-02-14T01:00:00.000	1970-01-01T16:52:10.149	157	0	0	0	43	0	0	0	0	0	1	0.052	100	0	44	0	0	0
0	0	0	0	0	0	0	1	0	0	0	269.184	0	0	0	3.4	103.4	0	0	0	-0.08	0	0	43	0	0	0	0	0	0	2019-02-14T01:00:00.000	1970-01-01T16:52:10.149	157	0	0	0	43	0	0	0	0	0	1	0.052	100	0	44	0	0	0
0	0	0	0	0	0	0	1	0	0	0	269.184	0	0	0	3.4	103.4	0	0	0	-0.07	0	0	43	0	0	0	0	0	0	2019-02-14T01:00:00.000	1970-01-01T16:52:10.269	157	0	0	0	43	0	0	0	0	0	1	0.052	100	0	44	0	0	0
0	0	0	0	0	0	0	1	0	0	0	269.184	0	0	0	3.4	103.4	0	0	0	-0.07	0	0	43	0	0	0	0	0	0	2019-02-14T01:00:00.000	1970-01-01T16:52:10.269	157	0	0	0	43	0	0	0	0	0	1	0.052	100	0	44	0	0	0
0	0	0	0	0	0	0	1	0	0	0	269.184	0	0	0	3.4	103.4	0	0	0	-0.07	0	0	43	0	0	0	0	0	0	2019-02-14T01:00:00.000	1970-01-01T16:52:10.269	157	0	0	0	43	0	0	0	0	0	1	0.052	100	0	44	0	0	0
0	0	0	0	0	0	0	1	0	0	0	269.184	0	0	0	3.4	103.4	0	0	0	-0.07	0	0	43	0	0	0	0	0	0	2019-02-14T01:00:00.000	1970-01-01T16:52:10.269	157	0	0	0	43	0	0	0	0	0	1	0.052	100	0	44	0	0	0
0	0	0	0	0	0	0	1	0	0	0	269.184	0	0	0	3.4	103.4	0	0	0	-0.07	0	0	43	0	0	0	0	0	0	2019-02-14T01:00:00.000	1970-01-01T16:52:10.269	157	0	0	0	43	0	0	0	0	0	1	0.052	100	0	44	0	0	0
0	0	0	0	0	0	0	1	0	0	0	269.184	0	0	0	3.4	103.4	0	0	0	-0.085	0	0	43	0	0	0	0	0	0	2019-02-14T01:00:00.000	1970-01-01T16:52:10.389	157	0	0	0	43	0	0	0	0	0	1	0.037	100	0	44	0	0	0
0	0	0	0	0	0	0	1	0	0	0	269.184	0	0	0	3.4	103.4	0	0	0	-0.085	0	0	43	0	0	0	0	0	0	2019-02-14T01:00:00.000	1970-01-01T16:52:10.389	157	0	0	0	43	0	0	0	0	0	1	0.037	100	0	44	0	0	0
0	0	0	0	0	0	0	1	0	0	0	269.184	0	0	0	3.4	103.4	0	0	0	-0.085	0	0	43	0	0	0	0	0	0	2019-02-14T01:00:00.000	1970-01-01T16:52:10.389	157	0	0	0	43	0	0	0	0	0	1	0.037	100	0	44	0	0	0
0	0	0	0	0	0	0	1	0	0	0	269.184	0	0	0	3.4	103.4	0	0	0	-0.085	0	0	43	0	0	0	0	0	0	2019-02-14T01:00:00.000	1970-01-01T16:52:10.389	157	0	0	0	43	0	0	0	0	0	1	0.037	100	0	44	0	0	0
0	0	0	0	0	0	0	1	0	0	0	269.184	0	0	0	3.4	103.4	0	0	0	-0.085	0	0	43	0	0	0	0	0	0	2019-02-14T01:00:00.000	1970-01-01T16:52:10.389	157	0	0	0	43	0	0	0	0	0	1	0.037	100	0	44	0	0	0
0	0	0	0	0	0	0	1	0	0	0	269.184	0	0	0	3.4	103.4	0	0	0	-0.095	0	0	43	0	0	0	0	0	0	2019-02-14T01:00:00.000	1970-01-01T16:52:10.509	157	0	0	0	43	0	0	0	0	0	1	0.045	100	0	44	0	0	0
0	0	0	0	0	0	0	1	0	0	0	269.184	0	0	0	3.4	103.4	0	0	0	-0.095	0	0	43	0	0	0	0	0	0	2019-02-14T01:00:00.000	1970-01-01T16:52:10.509	157	0	0	0	43	0	0	0	0	0	1	0.045	100	0	44	0	0	0
0	0	0	0	0	0	0	1	0	0	0	269.184	0	0	0	3.4	103.4	0	0	0	-0.095	0	0	43	0	0	0	0	0	0	2019-02-14T01:00:00.000	1970-01-01T16:52:10.509	157	0	0	0	43	0	0	0	0	0	1	0.045	100	0	44	0	0	0
0	0	0	0	0	0	0	1	0	0	0	269.184	0	0	0	3.4	103.4	0	0	0	-0.095	0	0	43	0	0	0	0	0	0	2019-02-14T01:00:00.000	1970-01-01T16:52:10.509	157	0	0	0	43	0	0	0	0	0	1	0.045	100	0	44	0	0	0
0	0	0	0	0	0	0	1	0	0	0	269.184	0	0	0	3.4	103.4	0	0	0	-0.095	0	0	43	0	0	0	0	0	0	2019-02-14T01:00:00.000	1970-01-01T16:52:10.509	157	0	0	0	43	0	0	0	0	0	1	0.045	100	0	44	0	0	0
0	0	0	0	0	0	0	1	0	0	0	269.184	0	0	0	3.4	103.4	0	0	0	-0.09	0	0	43	0	0	0	0	0	0	2019-02-14T01:00:00.000	1970-01-01T16:52:10.619	157	0	0	0	43	0	0	0	0	0	1	0.045	100	0	44	0	0	0
0	0	0	0	0	0	0	1	0	0	0	269.184	0	0	0	3.4	103.4	0	0	0	-0.09	0	0	43	0	0	0	0	0	0	2019-02-14T01:00:00.000	1970-01-01T16:52:10.619	157	0	0	0	43	0	0	0	0	0	1	0.045	100	0	44	0	0	0
0	0	0	0	0	0	0	1	0	0	0	269.184	0	0	0	3.4	103.4	0	0	0	-0.09	0	0	43	0	0	0	0	0	0	2019-02-14T01:00:00.000	1970-01-01T16:52:10.619	157	0	0	0	43	0	0	0	0	0	1	0.045	100	0	44	0	0	0
0	0	0	0	0	0	0	1	0	0	0	269.184	0	0	0	3.4	103.4	0	0	0	-0.09	0	0	43	0	0	0	0	0	0	2019-02-14T01:00:00.000	1970-01-01T16:52:10.619	157	0	0	0	43	0	0	0	0	0	1	0.045	100	0	44	0	0	0
0	0	0	0	0	0	0	1	0	0	0	269.184	0	0	0	3.4	103.4	0	0	0	-0.09	0	0	43	0	0	0	0	0	0	2019-02-14T01:00:00.000	1970-01-01T16:52:10.619	157	0	0	0	43	0	0	0	0	0	1	0.045	100	0	44	0	0	0
0	0	0	0	0	0	0	1	0	0	0	269.184	0	0	0	3.4	103.4	0	0	0	-0.085	0	0	43	0	0	0	0	0	0	2019-02-14T01:00:00.000	1970-01-01T16:52:10.739	157	0	0	0	43	0	0	0	0	0	1	0.052	100	0	44	0	0	0
0	0	0	0	0	0	0	1	0	0	0	269.184	0	0	0	3.4	103.4	0	0	0	-0.085	0	0	43	0	0	0	0	0	0	2019-02-14T01:00:00.000	1970-01-01T16:52:10.739	157	0	0	0	43	0	0	0	0	0	1	0.052	100	0	44	0	0	0
0	0	0	0	0	0	0	1	0	0	0	269.184	0	0	0	3.4	103.4	0	0	0	-0.085	0	0	43	0	0	0	0	0	0	2019-02-14T01:00:00.000	1970-01-01T16:52:10.739	157	0	0	0	43	0	0	0	0	0	1	0.052	100	0	44	0	0	0
0	0	0	0	0	0	0	1	0	0	0	269.184	0	0	0	3.4	103.4	0	0	0	-0.085	0	0	43	0	0	0	0	0	0	2019-02-14T01:00:00.000	1970-01-01T16:52:10.739	157	0	0	0	43	0	0	0	0	0	1	0.052	100	0	44	0	0	0
0	0	0	0	0	0	0	1	0	0	0	269.184	0	0	0	3.4	103.4	0	0	0	-0.085	0	0	43	0	0	0	0	0	0	2019-02-14T01:00:00.000	1970-01-01T16:52:10.739	157	0	0	0	43	0	0	0	0	0	1	0.052	100	0	44	0	0	0
0	0	0	0	0	0	0	1	0	0	0	269.184	0	0	0	3.4	103.4	0	0	0	-0.09	0	0	43	0	0	0	0	0	0	2019-02-14T01:00:00.000	1970-01-01T16:52:10.859	157	0	0	0	43	0	0	0	0	0	1	0.045	100	0	44	0	0	0
0	0	0	0	0	0	0	1	0	0	0	269.184	0	0	0	3.4	103.4	0	0	0	-0.09	0	0	43	0	0	0	0	0	0	2019-02-14T01:00:00.000	1970-01-01T16:52:10.859	157	0	0	0	43	0	0	0	0	0	1	0.045	100	0	44	0	0	0
0	0	0	0	0	0	0	1	0	0	0	269.184	0	0	0	3.4	103.4	0	0	0	-0.09	0	0	43	0	0	0	0	0	0	2019-02-14T01:00:00.000	1970-01-01T16:52:10.859	157	0	0	0	43	0	0	0	0	0	1	0.045	100	0	44	0	0	0
0	0	0	0	0	0	0	1	0	0	0	269.184	0	0	0	3.4	103.4	0	0	0	-0.09	0	0	43	0	0	0	0	0	0	2019-02-14T01:00:00.000	1970-01-01T16:52:10.859	157	0	0	0	43	0	0	0	0	0	1	0.045	100	0	44	0	0	0
0	0	0	0	0	0	0	1	0	0	0	269.184	0	0	0	3.4	103.4	0	0	0	-0.09	0	0	43	0	0	0	0	0	0	2019-02-14T01:00:00.000	1970-01-01T16:52:10.859	157	0	0	0	43	0	0	0	0	0	1	0.045	100	0	44	0	0	0
0	0	0	0	0	0	0	1	0	0	0	269.184	0	0	0	3.4	103.4	0	0	0	-0.085	0	0	43	0	0	0	0	0	0	2019-02-14T01:00:00.000	1970-01-01T16:52:10.979	157	0	0	0	43	0	0	0	0	0	1	0.037	100	0	44	0	0	0
0	0	0	0	0	0	0	1	0	0	0	269.184	0	0	0	3.4	103.4	0	0	0	-0.085	0	0	43	0	0	0	0	0	0	2019-02-14T01:00:00.000	1970-01-01T16:52:10.979	157	0	0	0	43	0	0	0	0	0	1	0.037	100	0	44	0	0	0
0	0	0	0	0	0	0	1	0	0	0	269.184	0	0	0	3.4	103.4	0	0	0	-0.085	0	0	43	0	0	0	0	0	0	2019-02-14T01:00:00.000	1970-01-01T16:52:10.979	157	0	0	0	43	0	0	0	0	0	1	0.037	100	0	44	0	0	0
0	0	0	0	0	0	0	1	0	0	0	269.184	0	0	0	3.4	103.4	0	0	0	-0.085	0	0	43	0	0	0	0	0	0	2019-02-14T01:00:00.000	1970-01-01T16:52:10.979	157	0	0	0	43	0	0	0	0	0	1	0.037	100	0	44	0	0	0
0	0	0	0	0	0	0	1	0	0	0	269.184	0	0	0	3.4	103.4	0	0	0	-0.085	0	0	43	0	0	0	0	0	0	2019-02-14T01:00:00.000	1970-01-01T16:52:10.979	157	0	0	0	43	0	0	0	0	0	1	0.037	100	0	44	0	0	0
0	0	0	0	0	0	0	1	0	0	0	269.184	0	0	0	3.4	103.4	0	0	0	-0.1	0	0	43	0	0	0	0	0	0	2019-02-14T01:00:00.000	1970-01-01T16:52:11.349	157	0	0	0	43	0	0	0	0	0	1	0.045	100	0	44	0	0	0
0	0	0	0	0	0	0	1	0	0	0	269.184	0	0	0	3.4	103.4	0	0	0	-0.1	0	0	43	0	0	0	0	0	0	2019-02-14T01:00:00.000	1970-01-01T16:52:11.349	157	0	0	0	43	0	0	0	0	0	1	0.045	100	0	44	0	0	0
0	0	0	0	0	0	0	1	0	0	0	269.184	0	0	0	3.4	103.4	0	0	0	-0.1	0	0	43	0	0	0	0	0	0	2019-02-14T01:00:00.000	1970-01-01T16:52:11.349	157	0	0	0	43	0	0	0	0	0	1	0.045	100	0	44	0	0	0
0	0	0	0	0	0	0	1	0	0	0	269.184	0	0	0	3.4	103.4	0	0	0	-0.1	0	0	43	0	0	0	0	0	0	2019-02-14T01:00:00.000	1970-01-01T16:52:11.349	157	0	0	0	43	0	0	0	0	0	1	0.045	100	0	44	0	0	0
0	0	0	0	0	0	0	1	0	0	0	269.184	0	0	0	3.4	103.4	0	0	0	-0.1	0	0	43	0	0	0	0	0	0	2019-02-14T01:00:00.000	1970-01-01T16:52:11.349	157	0	0	0	43	0	0	0	0	0	1	0.045	100	0	44	0	0	0
0	0	0	0	0	0	0	1	0	0	0	269.184	0	0	0	3.4	103.4	0	0	0	-0.085	0	0	43	0	0	0	0	0	0	2019-02-14T01:00:00.000	1970-01-01T16:52:11.459	157	0	0	0	43	0	0	0	0	0	1	0.045	100	0	44	0	0	0
0	0	0	0	0	0	0	1	0	0	0	269.184	0	0	0	3.4	103.4	0	0	0	-0.085	0	0	43	0	0	0	0	0	0	2019-02-14T01:00:00.000	1970-01-01T16:52:11.459	157	0	0	0	43	0	0	0	0	0	1	0.045	100	0	44	0	0	0
0	0	0	0	0	0	0	1	0	0	0	269.184	0	0	0	3.4	103.4	0	0	0	-0.085	0	0	43	0	0	0	0	0	0	2019-02-14T01:00:00.000	1970-01-01T16:52:11.459	157	0	0	0	43	0	0	0	0	0	1	0.045	100	0	44	0	0	0
0	0	0	0	0	0	0	1	0	0	0	269.184	0	0	0	3.4	103.4	0	0	0	-0.085	0	0	43	0	0	0	0	0	0	2019-02-14T01:00:00.000	1970-01-01T16:52:11.459	157	0	0	0	43	0	0	0	0	0	1	0.045	100	0	44	0	0	0
0	0	0	0	0	0	0	1	0	0	0	269.184	0	0	0	3.4	103.4	0	0	0	-0.085	0	0	43	0	0	0	0	0	0	2019-02-14T01:00:00.000	1970-01-01T16:52:11.459	157	0	0	0	43	0	0	0	0	0	1	0.045	100	0	44	0	0	0
0	0	0	0	0	0	0	1	0	0	0	269.184	0	0	0	3.4	103.4	0	0	0	-0.09	0	0	43	0	0	0	0	0	0	2019-02-14T01:00:00.000	1970-01-01T16:52:11.579	157	0	0	0	43	0	0	0	0	0	1	0.045	100	0	44	0	0	0
0	0	0	0	0	0	0	1	0	0	0	269.184	0	0	0	3.4	103.4	0	0	0	-0.09	0	0	43	0	0	0	0	0	0	2019-02-14T01:00:00.000	1970-01-01T16:52:11.579	157	0	0	0	43	0	0	0	0	0	1	0.045	100	0	44	0	0	0
0	0	0	0	0	0	0	1	0	0	0	269.184	0	0	0	3.4	103.4	0	0	0	-0.09	0	0	43	0	0	0	0	0	0	2019-02-14T01:00:00.000	1970-01-01T16:52:11.579	157	0	0	0	43	0	0	0	0	0	1	0.045	100	0	44	0	0	0
0	0	0	0	0	0	0	1	0	0	0	269.184	0	0	0	3.4	103.4	0	0	0	-0.09	0	0	43	0	0	0	0	0	0	2019-02-14T01:00:00.000	1970-01-01T16:52:11.579	157	0	0	0	43	0	0	0	0	0	1	0.045	100	0	44	0	0	0
0	0	0	0	0	0	0	1	0	0	0	269.184	0	0	0	3.4	103.4	0	0	0	-0.09	0	0	43	0	0	0	0	0	0	2019-02-14T01:00:00.000	1970-01-01T16:52:11.579	157	0	0	0	43	0	0	0	0	0	1	0.045	100	0	44	0	0	0
0	0	0	0	0	0	0	1	0	0	0	269.184	0	0	0	3.4	103.4	0	0	0	-0.08	0	0	43	0	0	0	0	0	0	2019-02-14T01:00:00.000	1970-01-01T16:52:11.699	157	0	0	0	43	0	0	0	0	0	1	0.03	100	0	44	0	0	0
0	0	0	0	0	0	0	1	0	0	0	269.184	0	0	0	3.4	103.4	0	0	0	-0.08	0	0	43	0	0	0	0	0	0	2019-02-14T01:00:00.000	1970-01-01T16:52:11.699	157	0	0	0	43	0	0	0	0	0	1	0.03	100	0	44	0	0	0
0	0	0	0	0	0	0	1	0	0	0	269.184	0	0	0	3.4	103.4	0	0	0	-0.08	0	0	43	0	0	0	0	0	0	2019-02-14T01:00:00.000	1970-01-01T16:52:11.699	157	0	0	0	43	0	0	0	0	0	1	0.03	100	0	44	0	0	0
0	0	0	0	0	0	0	1	0	0	0	269.184	0	0	0	3.4	103.4	0	0	0	-0.08	0	0	43	0	0	0	0	0	0	2019-02-14T01:00:00.000	1970-01-01T16:52:11.699	157	0	0	0	43	0	0	0	0	0	1	0.03	100	0	44	0	0	0
0	0	0	0	0	0	0	1	0	0	0	269.184	0	0	0	3.4	103.4	0	0	0	-0.08	0	0	43	0	0	0	0	0	0	2019-02-14T01:00:00.000	1970-01-01T16:52:11.699	157	0	0	0	43	0	0	0	0	0	1	0.03	100	0	44	0	0	0
0	0	0	0	0	0	0	1	0	0	0	269.184	0	0	0	3.4	103.4	0	0	0	-0.095	0	0	43	0	0	0	0	0	0	2019-02-14T01:00:00.000	1970-01-01T16:52:11.819	157	0	0	0	43	0	0	0	0	0	1	0.045	100	0	44	0	0	0
0	0	0	0	0	0	0	1	0	0	0	269.184	0	0	0	3.4	103.4	0	0	0	-0.095	0	0	43	0	0	0	0	0	0	2019-02-14T01:00:00.000	1970-01-01T16:52:11.819	157	0	0	0	43	0	0	0	0	0	1	0.045	100	0	44	0	0	0
0	0	0	0	0	0	0	1	0	0	0	269.184	0	0	0	3.4	103.4	0	0	0	-0.095	0	0	43	0	0	0	0	0	0	2019-02-14T01:00:00.000	1970-01-01T16:52:11.819	157	0	0	0	43	0	0	0	0	0	1	0.045	100	0	44	0	0	0
0	0	0	0	0	0	0	1	0	0	0	269.184	0	0	0	3.4	103.4	0	0	0	-0.095	0	0	43	0	0	0	0	0	0	2019-02-14T01:00:00.000	1970-01-01T16:52:11.819	157	0	0	0	43	0	0	0	0	0	1	0.045	100	0	44	0	0	0
0	0	0	0	0	0	0	1	0	0	0	269.184	0	0	0	3.4	103.4	0	0	0	-0.095	0	0	43	0	0	0	0	0	0	2019-02-14T01:00:00.000	1970-01-01T16:52:11.819	157	0	0	0	43	0	0	0	0	0	1	0.045	100	0	44	0	0	0
0	0	0	0	0	0	0	1	0	0	0	269.184	0	0	0	3.4	103.4	0	0	0	-0.09	0	0	43	0	0	0	0	0	0	2019-02-14T01:00:00.000	1970-01-01T16:52:11.929	157	0	0	0	43	0	0	0	0	0	1	0.045	100	0	44	0	0	0
0	0	0	0	0	0	0	1	0	0	0	269.184	0	0	0	3.4	103.4	0	0	0	-0.09	0	0	43	0	0	0	0	0	0	2019-02-14T01:00:00.000	1970-01-01T16:52:11.929	157	0	0	0	43	0	0	0	0	0	1	0.045	100	0	44	0	0	0
0	0	0	0	0	0	0	1	0	0	0	269.184	0	0	0	3.4	103.4	0	0	0	-0.09	0	0	43	0	0	0	0	0	0	2019-02-14T01:00:00.000	1970-01-01T16:52:11.929	157	0	0	0	43	0	0	0	0	0	1	0.045	100	0	44	0	0	0
0	0	0	0	0	0	0	1	0	0	0	269.184	0	0	0	3.4	103.4	0	0	0	-0.09	0	0	43	0	0	0	0	0	0	2019-02-14T01:00:00.000	1970-01-01T16:52:11.929	157	0	0	0	43	0	0	0	0	0	1	0.045	100	0	44	0	0	0
0	0	0	0	0	0	0	1	0	0	0	269.184	0	0	0	3.4	103.4	0	0	0	-0.09	0	0	43	0	0	0	0	0	0	2019-02-14T01:00:00.000	1970-01-01T16:52:11.929	157	0	0	0	43	0	0	0	0	0	1	0.045	100	0	44	0	0	0
0	0	0	0	0	0	0	1	0	0	0	269.184	0	0	0	3.4	103.4	0	0	0	-0.095	0	0	43	0	0	0	0	0	0	2019-02-14T01:00:00.000	1970-01-01T16:52:12.049	157	0	0	0	43	0	0	0	0	0	1	0.037	100	0	44	0	0	0
0	0	0	0	0	0	0	1	0	0	0	269.184	0	0	0	3.4	103.4	0	0	0	-0.095	0	0	43	0	0	0	0	0	0	2019-02-14T01:00:00.000	1970-01-01T16:52:12.049	157	0	0	0	43	0	0	0	0	0	1	0.037	100	0	44	0	0	0
0	0	0	0	0	0	0	1	0	0	0	269.184	0	0	0	3.4	103.4	0	0	0	-0.095	0	0	43	0	0	0	0	0	0	2019-02-14T01:00:00.000	1970-01-01T16:52:12.049	157	0	0	0	43	0	0	0	0	0	1	0.037	100	0	44	0	0	0
0	0	0	0	0	0	0	1	0	0	0	269.184	0	0	0	3.4	103.4	0	0	0	-0.095	0	0	43	0	0	0	0	0	0	2019-02-14T01:00:00.000	1970-01-01T16:52:12.049	157	0	0	0	43	0	0	0	0	0	1	0.037	100	0	44	0	0	0
0	0	0	0	0	0	0	1	0	0	0	269.184	0	0	0	3.4	103.4	0	0	0	-0.095	0	0	43	0	0	0	0	0	0	2019-02-14T01:00:00.000	1970-01-01T16:52:12.049	157	0	0	0	43	0	0	0	0	0	1	0.037	100	0	44	0	0	0
0	0	0	0	0	0	0	1	0	0	0	269.184	0	0	0	3.4	103.4	0	0	0	-0.09	0	0	43	0	0	0	0	0	0	2019-02-14T01:00:00.000	1970-01-01T16:52:12.169	157	0	0	0	43	0	0	0	0	0	1	0.037	100	0	44	0	0	0
0	0	0	0	0	0	0	1	0	0	0	269.184	0	0	0	3.4	103.4	0	0	0	-0.09	0	0	43	0	0	0	0	0	0	2019-02-14T01:00:00.000	1970-01-01T16:52:12.169	157	0	0	0	43	0	0	0	0	0	1	0.037	100	0	44	0	0	0
0	0	0	0	0	0	0	1	0	0	0	269.184	0	0	0	3.4	103.4	0	0	0	-0.09	0	0	43	0	0	0	0	0	0	2019-02-14T01:00:00.000	1970-01-01T16:52:12.169	157	0	0	0	43	0	0	0	0	0	1	0.037	100	0	44	0	0	0
0	0	0	0	0	0	0	1	0	0	0	269.184	0	0	0	3.4	103.4	0	0	0	-0.09	0	0	43	0	0	0	0	0	0	2019-02-14T01:00:00.000	1970-01-01T16:52:12.169	157	0	0	0	43	0	0	0	0	0	1	0.037	100	0	44	0	0	0
0	0	0	0	0	0	0	1	0	0	0	269.184	0	0	0	3.4	103.4	0	0	0	-0.09	0	0	43	0	0	0	0	0	0	2019-02-14T01:00:00.000	1970-01-01T16:52:12.169	157	0	0	0	43	0	0	0	0	0	1	0.037	100	0	44	0	0	0
0	0	0	0	0	0	0	1	0	0	0	269.184	0	0	0	3.4	103.4	0	0	0	-0.065	0	0	43	0	0	0	0	0	0	2019-02-14T01:00:00.000	1970-01-01T16:52:12.279	157	0	0	0	43	0	0	0	0	0	1	0.045	100	0	44	0	0	0
0	0	0	0	0	0	0	1	0	0	0	269.184	0	0	0	3.4	103.4	0	0	0	-0.065	0	0	43	0	0	0	0	0	0	2019-02-14T01:00:00.000	1970-01-01T16:52:12.279	157	0	0	0	43	0	0	0	0	0	1	0.045	100	0	44	0	0	0
0	0	0	0	0	0	0	1	0	0	0	269.184	0	0	0	3.4	103.4	0	0	0	-0.065	0	0	43	0	0	0	0	0	0	2019-02-14T01:00:00.000	1970-01-01T16:52:12.279	157	0	0	0	43	0	0	0	0	0	1	0.045	100	0	44	0	0	0
0	0	0	0	0	0	0	1	0	0	0	269.184	0	0	0	3.4	103.4	0	0	0	-0.065	0	0	43	0	0	0	0	0	0	2019-02-14T01:00:00.000	1970-01-01T16:52:12.279	157	0	0	0	43	0	0	0	0	0	1	0.045	100	0	44	0	0	0
0	0	0	0	0	0	0	1	0	0	0	269.184	0	0	0	3.4	103.4	0	0	0	-0.065	0	0	43	0	0	0	0	0	0	2019-02-14T01:00:00.000	1970-01-01T16:52:12.279	157	0	0	0	43	0	0	0	0	0	1	0.045	100	0	44	0	0	0
0	0	0	0	0	0	0	1	0	0	0	269.184	0	0	0	3.4	103.4	0	0	0	-0.08	0	0	43	0	0	0	0	0	0	2019-02-14T01:00:00.000	1970-01-01T16:52:12.399	157	0	0	0	43	0	0	0	0	0	1	0.045	100	0	44	0	0	0
0	0	0	0	0	0	0	1	0	0	0	269.184	0	0	0	3.4	103.4	0	0	0	-0.08	0	0	43	0	0	0	0	0	0	2019-02-14T01:00:00.000	1970-01-01T16:52:12.399	157	0	0	0	43	0	0	0	0	0	1	0.045	100	0	44	0	0	0
0	0	0	0	0	0	0	1	0	0	0	269.184	0	0	0	3.4	103.4	0	0	0	-0.08	0	0	43	0	0	0	0	0	0	2019-02-14T01:00:00.000	1970-01-01T16:52:12.399	157	0	0	0	43	0	0	0	0	0	1	0.045	100	0	44	0	0	0
0	0	0	0	0	0	0	1	0	0	0	269.184	0	0	0	3.4	103.4	0	0	0	-0.08	0	0	43	0	0	0	0	0	0	2019-02-14T01:00:00.000	1970-01-01T16:52:12.399	157	0	0	0	43	0	0	0	0	0	1	0.045	100	0	44	0	0	0
0	0	0	0	0	0	0	1	0	0	0	269.184	0	0	0	3.4	103.4	0	0	0	-0.08	0	0	43	0	0	0	0	0	0	2019-02-14T01:00:00.000	1970-01-01T16:52:12.399	157	0	0	0	43	0	0	0	0	0	1	0.045	100	0	44	0	0	0
0	0	0	0	0	0	0	1	0	0	0	269.184	0	0	0	3.4	103.4	0	0	0	-0.085	0	0	43	0	0	0	0	0	0	2019-02-14T01:00:00.000	1970-01-01T16:52:12.519	157	0	0	0	43	0	0	0	0	0	1	0.045	100	0	44	0	0	0
0	0	0	0	0	0	0	1	0	0	0	269.184	0	0	0	3.4	103.4	0	0	0	-0.085	0	0	43	0	0	0	0	0	0	2019-02-14T01:00:00.000	1970-01-01T16:52:12.519	157	0	0	0	43	0	0	0	0	0	1	0.045	100	0	44	0	0	0
0	0	0	0	0	0	0	1	0	0	0	269.184	0	0	0	3.4	103.4	0	0	0	-0.085	0	0	43	0	0	0	0	0	0	2019-02-14T01:00:00.000	1970-01-01T16:52:12.519	157	0	0	0	43	0	0	0	0	0	1	0.045	100	0	44	0	0	0
0	0	0	0	0	0	0	1	0	0	0	269.184	0	0	0	3.4	103.4	0	0	0	-0.085	0	0	43	0	0	0	0	0	0	2019-02-14T01:00:00.000	1970-01-01T16:52:12.519	157	0	0	0	43	0	0	0	0	0	1	0.045	100	0	44	0	0	0
0	0	0	0	0	0	0	1	0	0	0	269.184	0	0	0	3.4	103.4	0	0	0	-0.085	0	0	43	0	0	0	0	0	0	2019-02-14T01:00:00.000	1970-01-01T16:52:12.519	157	0	0	0	43	0	0	0	0	0	1	0.045	100	0	44	0	0	0
0	0	0	0	0	0	0	1	0	0	0	269.184	0	0	0	3.4	103.4	0	0	0	-0.09	0	0	43	0	0	0	0	0	0	2019-02-14T01:00:00.000	1970-01-01T16:52:12.639	157	0	0	0	43	0	0	0	0	0	1	0.045	100	0	44	0	0	0
0	0	0	0	0	0	0	1	0	0	0	269.184	0	0	0	3.4	103.4	0	0	0	-0.09	0	0	43	0	0	0	0	0	0	2019-02-14T01:00:00.000	1970-01-01T16:52:12.639	157	0	0	0	43	0	0	0	0	0	1	0.045	100	0	44	0	0	0
0	0	0	0	0	0	0	1	0	0	0	269.184	0	0	0	3.4	103.4	0	0	0	-0.09	0	0	43	0	0	0	0	0	0	2019-02-14T01:00:00.000	1970-01-01T16:52:12.639	157	0	0	0	43	0	0	0	0	0	1	0.045	100	0	44	0	0	0
0	0	0	0	0	0	0	1	0	0	0	269.184	0	0	0	3.4	103.4	0	0	0	-0.09	0	0	43	0	0	0	0	0	0	2019-02-14T01:00:00.000	1970-01-01T16:52:12.639	157	0	0	0	43	0	0	0	0	0	1	0.045	100	0	44	0	0	0
0	0	0	0	0	0	0	1	0	0	0	269.184	0	0	0	3.4	103.4	0	0	0	-0.09	0	0	43	0	0	0	0	0	0	2019-02-14T01:00:00.000	1970-01-01T16:52:12.639	157	0	0	0	43	0	0	0	0	0	1	0.045	100	0	44	0	0	0
0	0	0	0	0	0	0	1	0	0	0	269.184	0	0	0	3.4	103.4	0	0	0	-0.085	0	0	43	0	0	0	0	0	0	2019-02-14T01:00:00.000	1970-01-01T16:52:12.759	157	0	0	0	43	0	0	0	0	0	1	0.045	100	0	44	0	0	0
0	0	0	0	0	0	0	1	0	0	0	269.184	0	0	0	3.4	103.4	0	0	0	-0.085	0	0	43	0	0	0	0	0	0	2019-02-14T01:00:00.000	1970-01-01T16:52:12.759	157	0	0	0	43	0	0	0	0	0	1	0.045	100	0	44	0	0	0
0	0	0	0	0	0	0	1	0	0	0	269.184	0	0	0	3.4	103.4	0	0	0	-0.085	0	0	43	0	0	0	0	0	0	2019-02-14T01:00:00.000	1970-01-01T16:52:12.759	157	0	0	0	43	0	0	0	0	0	1	0.045	100	0	44	0	0	0
0	0	0	0	0	0	0	1	0	0	0	269.184	0	0	0	3.4	103.4	0	0	0	-0.085	0	0	43	0	0	0	0	0	0	2019-02-14T01:00:00.000	1970-01-01T16:52:12.759	157	0	0	0	43	0	0	0	0	0	1	0.045	100	0	44	0	0	0
0	0	0	0	0	0	0	1	0	0	0	269.184	0	0	0	3.4	103.4	0	0	0	-0.085	0	0	43	0	0	0	0	0	0	2019-02-14T01:00:00.000	1970-01-01T16:52:12.759	157	0	0	0	43	0	0	0	0	0	1	0.045	100	0	44	0	0	0
0	0	0	0	0	0	0	1	0	0	0	269.184	0	0	0	3.4	103.4	0	0	0	-0.09	0	0	43	0	0	0	0	0	0	2019-02-14T01:00:00.000	1970-01-01T16:52:12.869	157	0	0	0	43	0	0	0	0	0	1	0.045	100	0	44	0	0	0
0	0	0	0	0	0	0	1	0	0	0	269.184	0	0	0	3.4	103.4	0	0	0	-0.09	0	0	43	0	0	0	0	0	0	2019-02-14T01:00:00.000	1970-01-01T16:52:12.869	157	0	0	0	43	0	0	0	0	0	1	0.045	100	0	44	0	0	0
0	0	0	0	0	0	0	1	0	0	0	269.184	0	0	0	3.4	103.4	0	0	0	-0.09	0	0	43	0	0	0	0	0	0	2019-02-14T01:00:00.000	1970-01-01T16:52:12.869	157	0	0	0	43	0	0	0	0	0	1	0.045	100	0	44	0	0	0
0	0	0	0	0	0	0	1	0	0	0	269.184	0	0	0	3.4	103.4	0	0	0	-0.09	0	0	43	0	0	0	0	0	0	2019-02-14T01:00:00.000	1970-01-01T16:52:12.869	157	0	0	0	43	0	0	0	0	0	1	0.045	100	0	44	0	0	0
0	0	0	0	0	0	0	1	0	0	0	269.184	0	0	0	3.4	103.4	0	0	0	-0.09	0	0	43	0	0	0	0	0	0	2019-02-14T01:00:00.000	1970-01-01T16:52:12.869	157	0	0	0	43	0	0	0	0	0	1	0.045	100	0	44	0	0	0
0	0	0	0	0	0	0	1	0	0	0	269.184	0	0	0	3.4	103.4	0	0	0	-0.08	0	0	43	0	0	0	0	0	0	2019-02-14T01:00:00.000	1970-01-01T16:52:12.989	157	0	0	0	43	0	0	0	0	0	1	0.037	100	0	44	0	0	0
0	0	0	0	0	0	0	1	0	0	0	269.184	0	0	0	3.4	103.4	0	0	0	-0.08	0	0	43	0	0	0	0	0	0	2019-02-14T01:00:00.000	1970-01-01T16:52:12.989	157	0	0	0	43	0	0	0	0	0	1	0.037	100	0	44	0	0	0
0	0	0	0	0	0	0	1	0	0	0	269.184	0	0	0	3.4	103.4	0	0	0	-0.08	0	0	43	0	0	0	0	0	0	2019-02-14T01:00:00.000	1970-01-01T16:52:12.989	157	0	0	0	43	0	0	0	0	0	1	0.037	100	0	44	0	0	0
0	0	0	0	0	0	0	1	0	0	0	269.184	0	0	0	3.4	103.4	0	0	0	-0.08	0	0	43	0	0	0	0	0	0	2019-02-14T01:00:00.000	1970-01-01T16:52:12.989	157	0	0	0	43	0	0	0	0	0	1	0.037	100	0	44	0	0	0
0	0	0	0	0	0	0	1	0	0	0	269.184	0	0	0	3.4	103.4	0	0	0	-0.08	0	0	43	0	0	0	0	0	0	2019-02-14T01:00:00.000	1970-01-01T16:52:12.989	157	0	0	0	43	0	0	0	0	0	1	0.037	100	0	44	0	0	0
0	0	0	0	0	0	0	1	0	0	0	269.184	0	0	0	3.4	103.4	0	0	0	-0.075	0	0	43	0	0	0	0	0	0	2019-02-14T01:00:00.000	1970-01-01T16:52:13.109	157	0	0	0	43	0	0	0	0	0	1	0.022	100	0	44	0	0	0
0	0	0	0	0	0	0	1	0	0	0	269.184	0	0	0	3.4	103.4	0	0	0	-0.075	0	0	43	0	0	0	0	0	0	2019-02-14T01:00:00.000	1970-01-01T16:52:13.109	157	0	0	0	43	0	0	0	0	0	1	0.022	100	0	44	0	0	0
0	0	0	0	0	0	0	1	0	0	0	269.184	0	0	0	3.4	103.4	0	0	0	-0.075	0	0	43	0	0	0	0	0	0	2019-02-14T01:00:00.000	1970-01-01T16:52:13.109	157	0	0	0	43	0	0	0	0	0	1	0.022	100	0	44	0	0	0
0	0	0	0	0	0	0	1	0	0	0	269.184	0	0	0	3.4	103.4	0	0	0	-0.075	0	0	43	0	0	0	0	0	0	2019-02-14T01:00:00.000	1970-01-01T16:52:13.109	157	0	0	0	43	0	0	0	0	0	1	0.022	100	0	44	0	0	0
0	0	0	0	0	0	0	1	0	0	0	269.184	0	0	0	3.4	103.4	0	0	0	-0.075	0	0	43	0	0	0	0	0	0	2019-02-14T01:00:00.000	1970-01-01T16:52:13.109	157	0	0	0	43	0	0	0	0	0	1	0.022	100	0	44	0	0	0
0	0	0	0	0	0	0	1	0	0	0	269.184	0	0	0	3.4	103.4	0	0	0	-0.075	0	0	43	0	0	0	0	0	0	2019-02-14T01:00:00.000	1970-01-01T16:52:13.219	157	0	0	0	43	0	0	0	0	0	1	0.045	100	0	44	0	0	0
0	0	0	0	0	0	0	1	0	0	0	269.184	0	0	0	3.4	103.4	0	0	0	-0.075	0	0	43	0	0	0	0	0	0	2019-02-14T01:00:00.000	1970-01-01T16:52:13.219	157	0	0	0	43	0	0	0	0	0	1	0.045	100	0	44	0	0	0
0	0	0	0	0	0	0	1	0	0	0	269.184	0	0	0	3.4	103.4	0	0	0	-0.075	0	0	43	0	0	0	0	0	0	2019-02-14T01:00:00.000	1970-01-01T16:52:13.219	157	0	0	0	43	0	0	0	0	0	1	0.045	100	0	44	0	0	0
0	0	0	0	0	0	0	1	0	0	0	269.184	0	0	0	3.4	103.4	0	0	0	-0.075	0	0	43	0	0	0	0	0	0	2019-02-14T01:00:00.000	1970-01-01T16:52:13.219	157	0	0	0	43	0	0	0	0	0	1	0.045	100	0	44	0	0	0
0	0	0	0	0	0	0	1	0	0	0	269.184	0	0	0	3.4	103.4	0	0	0	-0.075	0	0	43	0	0	0	0	0	0	2019-02-14T01:00:00.000	1970-01-01T16:52:13.219	157	0	0	0	43	0	0	0	0	0	1	0.045	100	0	44	0	0	0
0	0	0	0	0	0	0	1	0	0	0	269.184	0	0	0	3.4	103.4	0	0	0	-0.085	0	0	43	0	0	0	0	0	0	2019-02-14T01:00:00.000	1970-01-01T16:52:13.339	157	0	0	0	43	0	0	0	0	0	1	0.045	100	0	44	0	0	0
0	0	0	0	0	0	0	1	0	0	0	269.184	0	0	0	3.4	103.4	0	0	0	-0.085	0	0	43	0	0	0	0	0	0	2019-02-14T01:00:00.000	1970-01-01T16:52:13.339	157	0	0	0	43	0	0	0	0	0	1	0.045	100	0	44	0	0	0
0	0	0	0	0	0	0	1	0	0	0	269.184	0	0	0	3.4	103.4	0	0	0	-0.085	0	0	43	0	0	0	0	0	0	2019-02-14T01:00:00.000	1970-01-01T16:52:13.339	157	0	0	0	43	0	0	0	0	0	1	0.045	100	0	44	0	0	0
0	0	0	0	0	0	0	1	0	0	0	269.184	0	0	0	3.4	103.4	0	0	0	-0.085	0	0	43	0	0	0	0	0	0	2019-02-14T01:00:00.000	1970-01-01T16:52:13.339	157	0	0	0	43	0	0	0	0	0	1	0.045	100	0	44	0	0	0
0	0	0	0	0	0	0	1	0	0	0	269.184	0	0	0	3.4	103.4	0	0	0	-0.085	0	0	43	0	0	0	0	0	0	2019-02-14T01:00:00.000	1970-01-01T16:52:13.339	157	0	0	0	43	0	0	0	0	0	1	0.045	100	0	44	0	0	0
0	0	0	0	0	0	0	1	0	0	0	269.184	0	0	0	3.4	103.4	0	0	0	-0.09	0	0	43	0	0	0	0	0	0	2019-02-14T01:00:00.000	1970-01-01T16:52:13.459	157	0	0	0	43	0	0	0	0	0	1	0.037	100	0	44	0	0	0
0	0	0	0	0	0	0	1	0	0	0	269.184	0	0	0	3.4	103.4	0	0	0	-0.09	0	0	43	0	0	0	0	0	0	2019-02-14T01:00:00.000	1970-01-01T16:52:13.459	157	0	0	0	43	0	0	0	0	0	1	0.037	100	0	44	0	0	0
0	0	0	0	0	0	0	1	0	0	0	269.184	0	0	0	3.4	103.4	0	0	0	-0.09	0	0	43	0	0	0	0	0	0	2019-02-14T01:00:00.000	1970-01-01T16:52:13.459	157	0	0	0	43	0	0	0	0	0	1	0.037	100	0	44	0	0	0
0	0	0	0	0	0	0	1	0	0	0	269.184	0	0	0	3.4	103.4	0	0	0	-0.09	0	0	43	0	0	0	0	0	0	2019-02-14T01:00:00.000	1970-01-01T16:52:13.459	157	0	0	0	43	0	0	0	0	0	1	0.037	100	0	44	0	0	0
0	0	0	0	0	0	0	1	0	0	0	269.184	0	0	0	3.4	103.4	0	0	0	-0.09	0	0	43	0	0	0	0	0	0	2019-02-14T01:00:00.000	1970-01-01T16:52:13.459	157	0	0	0	43	0	0	0	0	0	1	0.037	100	0	44	0	0	0
0	0	0	0	0	0	0	1	0	0	0	269.184	0	0	0	3.4	103.4	0	0	0	-0.085	0	0	43	0	0	0	0	0	0	2019-02-14T01:00:00.000	1970-01-01T16:52:13.569	157	0	0	0	43	0	0	0	0	0	1	0.052	100	0	44	0	0	0
0	0	0	0	0	0	0	1	0	0	0	269.184	0	0	0	3.4	103.4	0	0	0	-0.085	0	0	43	0	0	0	0	0	0	2019-02-14T01:00:00.000	1970-01-01T16:52:13.569	157	0	0	0	43	0	0	0	0	0	1	0.052	100	0	44	0	0	0
0	0	0	0	0	0	0	1	0	0	0	269.184	0	0	0	3.4	103.4	0	0	0	-0.085	0	0	43	0	0	0	0	0	0	2019-02-14T01:00:00.000	1970-01-01T16:52:13.569	157	0	0	0	43	0	0	0	0	0	1	0.052	100	0	44	0	0	0
0	0	0	0	0	0	0	1	0	0	0	269.184	0	0	0	3.4	103.4	0	0	0	-0.085	0	0	43	0	0	0	0	0	0	2019-02-14T01:00:00.000	1970-01-01T16:52:13.569	157	0	0	0	43	0	0	0	0	0	1	0.052	100	0	44	0	0	0
0	0	0	0	0	0	0	1	0	0	0	269.184	0	0	0	3.4	103.4	0	0	0	-0.085	0	0	43	0	0	0	0	0	0	2019-02-14T01:00:00.000	1970-01-01T16:52:13.569	157	0	0	0	43	0	0	0	0	0	1	0.052	100	0	44	0	0	0
0	0	0	0	0	0	0	1	0	0	0	269.184	0	0	0	3.4	103.4	0	0	0	-0.085	0	0	43	0	0	0	0	0	0	2019-02-14T01:00:00.000	1970-01-01T16:52:13.689	157	0	0	0	43	0	0	0	0	0	1	0.037	100	0	44	0	0	0
0	0	0	0	0	0	0	1	0	0	0	269.184	0	0	0	3.4	103.4	0	0	0	-0.085	0	0	43	0	0	0	0	0	0	2019-02-14T01:00:00.000	1970-01-01T16:52:13.689	157	0	0	0	43	0	0	0	0	0	1	0.037	100	0	44	0	0	0
0	0	0	0	0	0	0	1	0	0	0	269.184	0	0	0	3.4	103.4	0	0	0	-0.085	0	0	43	0	0	0	0	0	0	2019-02-14T01:00:00.000	1970-01-01T16:52:13.689	157	0	0	0	43	0	0	0	0	0	1	0.037	100	0	44	0	0	0
0	0	0	0	0	0	0	1	0	0	0	269.184	0	0	0	3.4	103.4	0	0	0	-0.085	0	0	43	0	0	0	0	0	0	2019-02-14T01:00:00.000	1970-01-01T16:52:13.689	157	0	0	0	43	0	0	0	0	0	1	0.037	100	0	44	0	0	0
0	0	0	0	0	0	0	1	0	0	0	269.184	0	0	0	3.4	103.4	0	0	0	-0.085	0	0	43	0	0	0	0	0	0	2019-02-14T01:00:00.000	1970-01-01T16:52:13.689	157	0	0	0	43	0	0	0	0	0	1	0.037	100	0	44	0	0	0
0	0	0	0	0	0	0	1	0	0	0	269.184	0	0	0	3.4	103.4	0	0	0	-0.095	0	0	43	0	0	0	0	0	0	2019-02-14T01:00:00.000	1970-01-01T16:52:13.809	157	0	0	0	43	0	0	0	0	0	1	0.037	100	0	44	0	0	0
0	0	0	0	0	0	0	1	0	0	0	269.184	0	0	0	3.4	103.4	0	0	0	-0.095	0	0	43	0	0	0	0	0	0	2019-02-14T01:00:00.000	1970-01-01T16:52:13.809	157	0	0	0	43	0	0	0	0	0	1	0.037	100	0	44	0	0	0
0	0	0	0	0	0	0	1	0	0	0	269.184	0	0	0	3.4	103.4	0	0	0	-0.095	0	0	43	0	0	0	0	0	0	2019-02-14T01:00:00.000	1970-01-01T16:52:13.809	157	0	0	0	43	0	0	0	0	0	1	0.037	100	0	44	0	0	0
0	0	0	0	0	0	0	1	0	0	0	269.184	0	0	0	3.4	103.4	0	0	0	-0.095	0	0	43	0	0	0	0	0	0	2019-02-14T01:00:00.000	1970-01-01T16:52:13.809	157	0	0	0	43	0	0	0	0	0	1	0.037	100	0	44	0	0	0
0	0	0	0	0	0	0	1	0	0	0	269.184	0	0	0	3.4	103.4	0	0	0	-0.095	0	0	43	0	0	0	0	0	0	2019-02-14T01:00:00.000	1970-01-01T16:52:13.809	157	0	0	0	43	0	0	0	0	0	1	0.037	100	0	44	0	0	0
0	0	0	0	0	0	0	1	0	0	0	269.184	0	0	0	3.4	103.4	0	0	0	-0.08	0	0	43	0	0	0	0	0	0	2019-02-14T01:00:00.000	1970-01-01T16:52:13.919	157	0	0	0	43	0	0	0	0	0	1	0.045	100	0	44	0	0	0
0	0	0	0	0	0	0	1	0	0	0	269.184	0	0	0	3.4	103.4	0	0	0	-0.08	0	0	43	0	0	0	0	0	0	2019-02-14T01:00:00.000	1970-01-01T16:52:13.919	157	0	0	0	43	0	0	0	0	0	1	0.045	100	0	44	0	0	0
0	0	0	0	0	0	0	1	0	0	0	269.184	0	0	0	3.4	103.4	0	0	0	-0.08	0	0	43	0	0	0	0	0	0	2019-02-14T01:00:00.000	1970-01-01T16:52:13.919	157	0	0	0	43	0	0	0	0	0	1	0.045	100	0	44	0	0	0
0	0	0	0	0	0	0	1	0	0	0	269.184	0	0	0	3.4	103.4	0	0	0	-0.08	0	0	43	0	0	0	0	0	0	2019-02-14T01:00:00.000	1970-01-01T16:52:13.919	157	0	0	0	43	0	0	0	0	0	1	0.045	100	0	44	0	0	0
0	0	0	0	0	0	0	1	0	0	0	269.184	0	0	0	3.4	103.4	0	0	0	-0.08	0	0	43	0	0	0	0	0	0	2019-02-14T01:00:00.000	1970-01-01T16:52:13.919	157	0	0	0	43	0	0	0	0	0	1	0.045	100	0	44	0	0	0
0	0	0	0	0	0	0	1	0	0	0	269.184	0	0	0	3.4	103.4	0	0	0	-0.085	0	0	43	0	0	0	0	0	0	2019-02-14T01:00:00.000	1970-01-01T16:52:14.039	157	0	0	0	43	0	0	0	0	0	1	0.037	100	0	44	0	0	0
0	0	0	0	0	0	0	1	0	0	0	269.184	0	0	0	3.4	103.4	0	0	0	-0.085	0	0	43	0	0	0	0	0	0	2019-02-14T01:00:00.000	1970-01-01T16:52:14.039	157	0	0	0	43	0	0	0	0	0	1	0.037	100	0	44	0	0	0
0	0	0	0	0	0	0	1	0	0	0	269.184	0	0	0	3.4	103.4	0	0	0	-0.085	0	0	43	0	0	0	0	0	0	2019-02-14T01:00:00.000	1970-01-01T16:52:14.039	157	0	0	0	43	0	0	0	0	0	1	0.037	100	0	44	0	0	0
0	0	0	0	0	0	0	1	0	0	0	269.184	0	0	0	3.4	103.4	0	0	0	-0.085	0	0	43	0	0	0	0	0	0	2019-02-14T01:00:00.000	1970-01-01T16:52:14.039	157	0	0	0	43	0	0	0	0	0	1	0.037	100	0	44	0	0	0
0	0	0	0	0	0	0	1	0	0	0	269.184	0	0	0	3.4	103.4	0	0	0	-0.085	0	0	43	0	0	0	0	0	0	2019-02-14T01:00:00.000	1970-01-01T16:52:14.039	157	0	0	0	43	0	0	0	0	0	1	0.037	100	0	44	0	0	0
0	0	0	0	0	0	0	1	0	0	0	269.184	0	0	0	3.4	103.4	0	0	0	-0.09	0	0	43	0	0	0	0	0	0	2019-02-14T01:00:00.000	1970-01-01T16:52:14.159	157	0	0	0	43	0	0	0	0	0	1	0.037	100	0	44	0	0	0
0	0	0	0	0	0	0	1	0	0	0	269.184	0	0	0	3.4	103.4	0	0	0	-0.09	0	0	43	0	0	0	0	0	0	2019-02-14T01:00:00.000	1970-01-01T16:52:14.159	157	0	0	0	43	0	0	0	0	0	1	0.037	100	0	44	0	0	0
0	0	0	0	0	0	0	1	0	0	0	269.184	0	0	0	3.4	103.4	0	0	0	-0.09	0	0	43	0	0	0	0	0	0	2019-02-14T01:00:00.000	1970-01-01T16:52:14.419	157	0	0	0	43	0	0	0	0	0	1	0.03	100	0	44	0	0	0
0	0	0	0	0	0	0	1	0	0	0	269.184	0	0	0	3.4	103.4	0	0	0	-0.09	0	0	43	0	0	0	0	0	0	2019-02-14T01:00:00.000	1970-01-01T16:52:14.419	157	0	0	0	43	0	0	0	0	0	1	0.03	100	0	44	0	0	0
0	0	0	0	0	0	0	1	0	0	0	269.184	0	0	0	3.4	103.4	0	0	0	-0.09	0	0	43	0	0	0	0	0	0	2019-02-14T01:00:00.000	1970-01-01T16:52:14.419	157	0	0	0	43	0	0	0	0	0	1	0.03	100	0	44	0	0	0
0	0	0	0	0	0	0	1	0	0	0	269.184	0	0	0	3.4	103.4	0	0	0	-0.09	0	0	43	0	0	0	0	0	0	2019-02-14T01:00:00.000	1970-01-01T16:52:14.419	157	0	0	0	43	0	0	0	0	0	1	0.03	100	0	44	0	0	0
0	0	0	0	0	0	0	1	0	0	0	269.184	0	0	0	3.4	103.4	0	0	0	-0.09	0	0	43	0	0	0	0	0	0	2019-02-14T01:00:00.000	1970-01-01T16:52:14.419	157	0	0	0	43	0	0	0	0	0	1	0.03	100	0	44	0	0	0
0	0	0	0	0	0	0	1	0	0	0	269.184	0	0	0	3.4	103.4	0	0	0	-0.09	0	0	43	0	0	0	0	0	0	2019-02-14T01:00:00.000	1970-01-01T16:52:14.529	157	0	0	0	43	0	0	0	0	0	1	0.045	100	0	44	0	0	0
0	0	0	0	0	0	0	1	0	0	0	269.184	0	0	0	3.4	103.4	0	0	0	-0.09	0	0	43	0	0	0	0	0	0	2019-02-14T01:00:00.000	1970-01-01T16:52:14.529	157	0	0	0	43	0	0	0	0	0	1	0.045	100	0	44	0	0	0
0	0	0	0	0	0	0	1	0	0	0	269.184	0	0	0	3.4	103.4	0	0	0	-0.09	0	0	43	0	0	0	0	0	0	2019-02-14T01:00:00.000	1970-01-01T16:52:14.529	157	0	0	0	43	0	0	0	0	0	1	0.045	100	0	44	0	0	0
0	0	0	0	0	0	0	1	0	0	0	269.184	0	0	0	3.4	103.4	0	0	0	-0.09	0	0	43	0	0	0	0	0	0	2019-02-14T01:00:00.000	1970-01-01T16:52:14.529	157	0	0	0	43	0	0	0	0	0	1	0.045	100	0	44	0	0	0
0	0	0	0	0	0	0	1	0	0	0	269.184	0	0	0	3.4	103.4	0	0	0	-0.09	0	0	43	0	0	0	0	0	0	2019-02-14T01:00:00.000	1970-01-01T16:52:14.529	157	0	0	0	43	0	0	0	0	0	1	0.045	100	0	44	0	0	0
0	0	0	0	0	0	0	1	0	0	0	269.184	0	0	0	3.4	103.4	0	0	0	-0.085	0	0	43	0	0	0	0	0	0	2019-02-14T01:00:00.000	1970-01-01T16:52:14.649	157	0	0	0	43	0	0	0	0	0	1	0.045	100	0	44	0	0	0
0	0	0	0	0	0	0	1	0	0	0	269.184	0	0	0	3.4	103.4	0	0	0	-0.085	0	0	43	0	0	0	0	0	0	2019-02-14T01:00:00.000	1970-01-01T16:52:14.649	157	0	0	0	43	0	0	0	0	0	1	0.045	100	0	44	0	0	0
0	0	0	0	0	0	0	1	0	0	0	269.184	0	0	0	3.4	103.4	0	0	0	-0.085	0	0	43	0	0	0	0	0	0	2019-02-14T01:00:00.000	1970-01-01T16:52:14.649	157	0	0	0	43	0	0	0	0	0	1	0.045	100	0	44	0	0	0
0	0	0	0	0	0	0	1	0	0	0	269.184	0	0	0	3.4	103.4	0	0	0	-0.085	0	0	43	0	0	0	0	0	0	2019-02-14T01:00:00.000	1970-01-01T16:52:14.649	157	0	0	0	43	0	0	0	0	0	1	0.045	100	0	44	0	0	0
0	0	0	0	0	0	0	1	0	0	0	269.184	0	0	0	3.4	103.4	0	0	0	-0.085	0	0	43	0	0	0	0	0	0	2019-02-14T01:00:00.000	1970-01-01T16:52:14.649	157	0	0	0	43	0	0	0	0	0	1	0.045	100	0	44	0	0	0
0	0	0	0	0	0	0	1	0	0	0	269.184	0	0	0	3.4	103.4	0	0	0	-0.09	0	0	43	0	0	0	0	0	0	2019-02-14T01:00:00.000	1970-01-01T16:52:14.769	157	0	0	0	43	0	0	0	0	0	1	0.045	100	0	44	0	0	0
0	0	0	0	0	0	0	1	0	0	0	269.184	0	0	0	3.4	103.4	0	0	0	-0.09	0	0	43	0	0	0	0	0	0	2019-02-14T01:00:00.000	1970-01-01T16:52:14.769	157	0	0	0	43	0	0	0	0	0	1	0.045	100	0	44	0	0	0
0	0	0	0	0	0	0	1	0	0	0	269.184	0	0	0	3.4	103.4	0	0	0	-0.09	0	0	43	0	0	0	0	0	0	2019-02-14T01:00:00.000	1970-01-01T16:52:14.769	157	0	0	0	43	0	0	0	0	0	1	0.045	100	0	44	0	0	0
0	0	0	0	0	0	0	1	0	0	0	269.184	0	0	0	3.4	103.4	0	0	0	-0.09	0	0	43	0	0	0	0	0	0	2019-02-14T01:00:00.000	1970-01-01T16:52:14.769	157	0	0	0	43	0	0	0	0	0	1	0.045	100	0	44	0	0	0
0	0	0	0	0	0	0	1	0	0	0	269.184	0	0	0	3.4	103.4	0	0	0	-0.09	0	0	43	0	0	0	0	0	0	2019-02-14T01:00:00.000	1970-01-01T16:52:14.769	157	0	0	0	43	0	0	0	0	0	1	0.045	100	0	44	0	0	0
0	0	0	0	0	0	0	1	0	0	0	269.184	0	0	0	3.4	103.4	0	0	0	-0.08	0	0	43	0	0	0	0	0	0	2019-02-14T01:00:00.000	1970-01-01T16:52:14.879	157	0	0	0	43	0	0	0	0	0	1	0.037	100	0	44	0	0	0
0	0	0	0	0	0	0	1	0	0	0	269.184	0	0	0	3.4	103.4	0	0	0	-0.08	0	0	43	0	0	0	0	0	0	2019-02-14T01:00:00.000	1970-01-01T16:52:14.879	157	0	0	0	43	0	0	0	0	0	1	0.037	100	0	44	0	0	0
0	0	0	0	0	0	0	1	0	0	0	269.184	0	0	0	3.4	103.4	0	0	0	-0.08	0	0	43	0	0	0	0	0	0	2019-02-14T01:00:00.000	1970-01-01T16:52:14.879	157	0	0	0	43	0	0	0	0	0	1	0.037	100	0	44	0	0	0
0	0	0	0	0	0	0	1	0	0	0	269.184	0	0	0	3.4	103.4	0	0	0	-0.08	0	0	43	0	0	0	0	0	0	2019-02-14T01:00:00.000	1970-01-01T16:52:14.879	157	0	0	0	43	0	0	0	0	0	1	0.037	100	0	44	0	0	0
0	0	0	0	0	0	0	1	0	0	0	269.184	0	0	0	3.4	103.4	0	0	0	-0.08	0	0	43	0	0	0	0	0	0	2019-02-14T01:00:00.000	1970-01-01T16:52:14.879	157	0	0	0	43	0	0	0	0	0	1	0.037	100	0	44	0	0	0
0	0	0	0	0	0	0	1	0	0	0	269.184	0	0	0	3.4	103.4	0	0	0	-0.06	0	0	43	0	0	0	0	0	0	2019-02-14T01:00:00.000	1970-01-01T16:52:14.999	157	0	0	0	43	0	0	0	0	0	1	0.037	100	0	44	0	0	0
0	0	0	0	0	0	0	1	0	0	0	269.184	0	0	0	3.4	103.4	0	0	0	-0.06	0	0	43	0	0	0	0	0	0	2019-02-14T01:00:00.000	1970-01-01T16:52:14.999	157	0	0	0	43	0	0	0	0	0	1	0.037	100	0	44	0	0	0
0	0	0	0	0	0	0	1	0	0	0	269.184	0	0	0	3.4	103.4	0	0	0	-0.06	0	0	43	0	0	0	0	0	0	2019-02-14T01:00:00.000	1970-01-01T16:52:14.999	157	0	0	0	43	0	0	0	0	0	1	0.037	100	0	44	0	0	0
0	0	0	0	0	0	0	1	0	0	0	269.184	0	0	0	3.4	103.4	0	0	0	-0.06	0	0	43	0	0	0	0	0	0	2019-02-14T01:00:00.000	1970-01-01T16:52:14.999	157	0	0	0	43	0	0	0	0	0	1	0.037	100	0	44	0	0	0
0	0	0	0	0	0	0	1	0	0	0	269.184	0	0	0	3.4	103.4	0	0	0	-0.06	0	0	43	0	0	0	0	0	0	2019-02-14T01:00:00.000	1970-01-01T16:52:14.999	157	0	0	0	43	0	0	0	0	0	1	0.037	100	0	44	0	0	0
0	0	0	0	0	0	0	1	0	0	0	269.184	0	0	0	3.4	103.4	0	0	0	-0.09	0	0	43	0	0	0	0	0	0	2019-02-14T01:00:00.000	1970-01-01T16:52:15.119	157	0	0	0	43	0	0	0	0	0	1	0.045	100	0	44	0	0	0
0	0	0	0	0	0	0	1	0	0	0	269.184	0	0	0	3.4	103.4	0	0	0	-0.09	0	0	43	0	0	0	0	0	0	2019-02-14T01:00:00.000	1970-01-01T16:52:15.119	157	0	0	0	43	0	0	0	0	0	1	0.045	100	0	44	0	0	0
0	0	0	0	0	0	0	1	0	0	0	269.184	0	0	0	3.4	103.4	0	0	0	-0.09	0	0	43	0	0	0	0	0	0	2019-02-14T01:00:00.000	1970-01-01T16:52:15.119	157	0	0	0	43	0	0	0	0	0	1	0.045	100	0	44	0	0	0
0	0	0	0	0	0	0	1	0	0	0	269.184	0	0	0	3.4	103.4	0	0	0	-0.09	0	0	43	0	0	0	0	0	0	2019-02-14T01:00:00.000	1970-01-01T16:52:15.119	157	0	0	0	43	0	0	0	0	0	1	0.045	100	0	44	0	0	0
0	0	0	0	0	0	0	1	0	0	0	269.184	0	0	0	3.4	103.4	0	0	0	-0.09	0	0	43	0	0	0	0	0	0	2019-02-14T01:00:00.000	1970-01-01T16:52:15.119	157	0	0	0	43	0	0	0	0	0	1	0.045	100	0	44	0	0	0
0	0	0	0	0	0	0	1	0	0	0	269.184	0	0	0	3.4	103.4	0	0	0	-0.075	0	0	43	0	0	0	0	0	0	2019-02-14T01:00:00.000	1970-01-01T16:52:15.239	157	0	0	0	43	0	0	0	0	0	1	0.037	100	0	44	0	0	0
0	0	0	0	0	0	0	1	0	0	0	269.184	0	0	0	3.4	103.4	0	0	0	-0.075	0	0	43	0	0	0	0	0	0	2019-02-14T01:00:00.000	1970-01-01T16:52:15.239	157	0	0	0	43	0	0	0	0	0	1	0.037	100	0	44	0	0	0
0	0	0	0	0	0	0	1	0	0	0	269.184	0	0	0	3.4	103.4	0	0	0	-0.075	0	0	43	0	0	0	0	0	0	2019-02-14T01:00:00.000	1970-01-01T16:52:15.239	157	0	0	0	43	0	0	0	0	0	1	0.037	100	0	44	0	0	0
0	0	0	0	0	0	0	1	0	0	0	269.184	0	0	0	3.4	103.4	0	0	0	-0.075	0	0	43	0	0	0	0	0	0	2019-02-14T01:00:00.000	1970-01-01T16:52:15.239	157	0	0	0	43	0	0	0	0	0	1	0.037	100	0	44	0	0	0
0	0	0	0	0	0	0	1	0	0	0	269.184	0	0	0	3.4	103.4	0	0	0	-0.075	0	0	43	0	0	0	0	0	0	2019-02-14T01:00:00.000	1970-01-01T16:52:15.239	157	0	0	0	43	0	0	0	0	0	1	0.037	100	0	44	0	0	0
0	0	0	0	0	0	0	1	0	0	0	269.184	0	0	0	3.4	103.4	0	0	0	-0.085	0	0	43	0	0	0	0	0	0	2019-02-14T01:00:00.000	1970-01-01T16:52:15.359	157	0	0	0	43	0	0	0	0	0	1	0.037	100	0	44	0	0	0
0	0	0	0	0	0	0	1	0	0	0	269.184	0	0	0	3.4	103.4	0	0	0	-0.085	0	0	43	0	0	0	0	0	0	2019-02-14T01:00:00.000	1970-01-01T16:52:15.359	157	0	0	0	43	0	0	0	0	0	1	0.037	100	0	44	0	0	0
0	0	0	0	0	0	0	1	0	0	0	269.184	0	0	0	3.4	103.4	0	0	0	-0.085	0	0	43	0	0	0	0	0	0	2019-02-14T01:00:00.000	1970-01-01T16:52:15.359	157	0	0	0	43	0	0	0	0	0	1	0.037	100	0	44	0	0	0
0	0	0	0	0	0	0	1	0	0	0	269.184	0	0	0	3.4	103.4	0	0	0	-0.085	0	0	43	0	0	0	0	0	0	2019-02-14T01:00:00.000	1970-01-01T16:52:15.359	157	0	0	0	43	0	0	0	0	0	1	0.037	100	0	44	0	0	0
0	0	0	0	0	0	0	1	0	0	0	269.184	0	0	0	3.4	103.4	0	0	0	-0.085	0	0	43	0	0	0	0	0	0	2019-02-14T01:00:00.000	1970-01-01T16:52:15.359	157	0	0	0	43	0	0	0	0	0	1	0.037	100	0	44	0	0	0
0	0	0	0	0	0	0	1	0	0	0	269.184	0	0	0	3.4	103.4	0	0	0	-0.095	0	0	43	0	0	0	0	0	0	2019-02-14T01:00:00.000	1970-01-01T16:52:15.469	157	0	0	0	43	0	0	0	0	0	1	0.045	100	0	44	0	0	0
0	0	0	0	0	0	0	1	0	0	0	269.184	0	0	0	3.4	103.4	0	0	0	-0.095	0	0	43	0	0	0	0	0	0	2019-02-14T01:00:00.000	1970-01-01T16:52:15.469	157	0	0	0	43	0	0	0	0	0	1	0.045	100	0	44	0	0	0
0	0	0	0	0	0	0	1	0	0	0	269.184	0	0	0	3.4	103.4	0	0	0	-0.095	0	0	43	0	0	0	0	0	0	2019-02-14T01:00:00.000	1970-01-01T16:52:15.469	157	0	0	0	43	0	0	0	0	0	1	0.045	100	0	44	0	0	0
0	0	0	0	0	0	0	1	0	0	0	269.184	0	0	0	3.4	103.4	0	0	0	-0.095	0	0	43	0	0	0	0	0	0	2019-02-14T01:00:00.000	1970-01-01T16:52:15.469	157	0	0	0	43	0	0	0	0	0	1	0.045	100	0	44	0	0	0
0	0	0	0	0	0	0	1	0	0	0	269.184	0	0	0	3.4	103.4	0	0	0	-0.095	0	0	43	0	0	0	0	0	0	2019-02-14T01:00:00.000	1970-01-01T16:52:15.469	157	0	0	0	43	0	0	0	0	0	1	0.045	100	0	44	0	0	0
0	0	0	0	0	0	0	1	0	0	0	269.184	0	0	0	3.4	103.4	0	0	0	-0.08	0	0	43	0	0	0	0	0	0	2019-02-14T01:00:00.000	1970-01-01T16:52:15.589	157	0	0	0	43	0	0	0	0	0	1	0.037	100	0	44	0	0	0
0	0	0	0	0	0	0	1	0	0	0	269.184	0	0	0	3.4	103.4	0	0	0	-0.08	0	0	43	0	0	0	0	0	0	2019-02-14T01:00:00.000	1970-01-01T16:52:15.589	157	0	0	0	43	0	0	0	0	0	1	0.037	100	0	44	0	0	0
0	0	0	0	0	0	0	1	0	0	0	269.184	0	0	0	3.4	103.4	0	0	0	-0.08	0	0	43	0	0	0	0	0	0	2019-02-14T01:00:00.000	1970-01-01T16:52:15.589	157	0	0	0	43	0	0	0	0	0	1	0.037	100	0	44	0	0	0
0	0	0	0	0	0	0	1	0	0	0	269.184	0	0	0	3.4	103.4	0	0	0	-0.08	0	0	43	0	0	0	0	0	0	2019-02-14T01:00:00.000	1970-01-01T16:52:15.589	157	0	0	0	43	0	0	0	0	0	1	0.037	100	0	44	0	0	0
0	0	0	0	0	0	0	1	0	0	0	269.184	0	0	0	3.4	103.4	0	0	0	-0.08	0	0	43	0	0	0	0	0	0	2019-02-14T01:00:00.000	1970-01-01T16:52:15.589	157	0	0	0	43	0	0	0	0	0	1	0.037	100	0	44	0	0	0
0	0	0	0	0	0	0	1	0	0	0	269.184	0	0	0	3.4	103.4	0	0	0	-0.075	0	0	43	0	0	0	0	0	0	2019-02-14T01:00:00.000	1970-01-01T16:52:15.709	157	0	0	0	43	0	0	0	0	0	1	0.037	100	0	44	0	0	0
0	0	0	0	0	0	0	1	0	0	0	269.184	0	0	0	3.4	103.4	0	0	0	-0.075	0	0	43	0	0	0	0	0	0	2019-02-14T01:00:00.000	1970-01-01T16:52:15.709	157	0	0	0	43	0	0	0	0	0	1	0.037	100	0	44	0	0	0
0	0	0	0	0	0	0	1	0	0	0	269.184	0	0	0	3.4	103.4	0	0	0	-0.075	0	0	43	0	0	0	0	0	0	2019-02-14T01:00:00.000	1970-01-01T16:52:15.709	157	0	0	0	43	0	0	0	0	0	1	0.037	100	0	44	0	0	0
0	0	0	0	0	0	0	1	0	0	0	269.184	0	0	0	3.4	103.4	0	0	0	-0.075	0	0	43	0	0	0	0	0	0	2019-02-14T01:00:00.000	1970-01-01T16:52:15.709	157	0	0	0	43	0	0	0	0	0	1	0.037	100	0	44	0	0	0
0	0	0	0	0	0	0	1	0	0	0	269.184	0	0	0	3.4	103.4	0	0	0	-0.075	0	0	43	0	0	0	0	0	0	2019-02-14T01:00:00.000	1970-01-01T16:52:15.709	157	0	0	0	43	0	0	0	0	0	1	0.037	100	0	44	0	0	0
0	0	0	0	0	0	0	1	0	0	0	269.184	0	0	0	3.4	103.4	0	0	0	-0.09	0	0	43	0	0	0	0	0	0	2019-02-14T01:00:00.000	1970-01-01T16:52:15.829	157	0	0	0	43	0	0	0	0	0	1	0.045	100	0	44	0	0	0
0	0	0	0	0	0	0	1	0	0	0	269.184	0	0	0	3.4	103.4	0	0	0	-0.09	0	0	43	0	0	0	0	0	0	2019-02-14T01:00:00.000	1970-01-01T16:52:15.829	157	0	0	0	43	0	0	0	0	0	1	0.045	100	0	44	0	0	0
0	0	0	0	0	0	0	1	0	0	0	269.184	0	0	0	3.4	103.4	0	0	0	-0.09	0	0	43	0	0	0	0	0	0	2019-02-14T01:00:00.000	1970-01-01T16:52:15.829	157	0	0	0	43	0	0	0	0	0	1	0.045	100	0	44	0	0	0
0	0	0	0	0	0	0	1	0	0	0	269.184	0	0	0	3.4	103.4	0	0	0	-0.09	0	0	43	0	0	0	0	0	0	2019-02-14T01:00:00.000	1970-01-01T16:52:15.829	157	0	0	0	43	0	0	0	0	0	1	0.045	100	0	44	0	0	0
0	0	0	0	0	0	0	1	0	0	0	269.184	0	0	0	3.4	103.4	0	0	0	-0.09	0	0	43	0	0	0	0	0	0	2019-02-14T01:00:00.000	1970-01-01T16:52:15.829	157	0	0	0	43	0	0	0	0	0	1	0.045	100	0	44	0	0	0
0	0	0	0	0	0	0	1	0	0	0	269.184	0	0	0	3.4	103.4	0	0	0	-0.09	0	0	43	0	0	0	0	0	0	2019-02-14T01:00:00.000	1970-01-01T16:52:15.939	157	0	0	0	43	0	0	0	0	0	1	0.037	100	0	44	0	0	0
0	0	0	0	0	0	0	1	0	0	0	269.184	0	0	0	3.4	103.4	0	0	0	-0.09	0	0	43	0	0	0	0	0	0	2019-02-14T01:00:00.000	1970-01-01T16:52:15.939	157	0	0	0	43	0	0	0	0	0	1	0.037	100	0	44	0	0	0
0	0	0	0	0	0	0	1	0	0	0	269.184	0	0	0	3.4	103.4	0	0	0	-0.09	0	0	43	0	0	0	0	0	0	2019-02-14T01:00:00.000	1970-01-01T16:52:15.939	157	0	0	0	43	0	0	0	0	0	1	0.037	100	0	44	0	0	0
0	0	0	0	0	0	0	1	0	0	0	269.184	0	0	0	3.4	103.4	0	0	0	-0.09	0	0	43	0	0	0	0	0	0	2019-02-14T01:00:00.000	1970-01-01T16:52:15.939	157	0	0	0	43	0	0	0	0	0	1	0.037	100	0	44	0	0	0
0	0	0	0	0	0	0	1	0	0	0	269.184	0	0	0	3.4	103.4	0	0	0	-0.09	0	0	43	0	0	0	0	0	0	2019-02-14T01:00:00.000	1970-01-01T16:52:15.939	157	0	0	0	43	0	0	0	0	0	1	0.037	100	0	44	0	0	0
0	0	0	0	0	0	0	1	0	0	0	269.184	0	0	0	3.4	103.4	0	0	0	-0.085	0	0	43	0	0	0	0	0	0	2019-02-14T01:00:00.000	1970-01-01T16:52:16.059	157	0	0	0	43	0	0	0	0	0	1	0.045	100	0	44	0	0	0
0	0	0	0	0	0	0	1	0	0	0	269.184	0	0	0	3.4	103.4	0	0	0	-0.085	0	0	43	0	0	0	0	0	0	2019-02-14T01:00:00.000	1970-01-01T16:52:16.059	157	0	0	0	43	0	0	0	0	0	1	0.045	100	0	44	0	0	0
0	0	0	0	0	0	0	1	0	0	0	269.184	0	0	0	3.4	103.4	0	0	0	-0.085	0	0	43	0	0	0	0	0	0	2019-02-14T01:00:00.000	1970-01-01T16:52:16.059	157	0	0	0	43	0	0	0	0	0	1	0.045	100	0	44	0	0	0
0	0	0	0	0	0	0	1	0	0	0	269.184	0	0	0	3.4	103.4	0	0	0	-0.085	0	0	43	0	0	0	0	0	0	2019-02-14T01:00:00.000	1970-01-01T16:52:16.059	157	0	0	0	43	0	0	0	0	0	1	0.045	100	0	44	0	0	0
0	0	0	0	0	0	0	1	0	0	0	269.184	0	0	0	3.4	103.4	0	0	0	-0.085	0	0	43	0	0	0	0	0	0	2019-02-14T01:00:00.000	1970-01-01T16:52:16.059	157	0	0	0	43	0	0	0	0	0	1	0.045	100	0	44	0	0	0
0	0	0	0	0	0	0	1	0	0	0	269.184	0	0	0	3.4	103.4	0	0	0	-0.075	0	0	43	0	0	0	0	0	0	2019-02-14T01:00:00.000	1970-01-01T16:52:16.179	157	0	0	0	43	0	0	0	0	0	1	0.052	100	0	44	0	0	0
0	0	0	0	0	0	0	1	0	0	0	269.184	0	0	0	3.4	103.4	0	0	0	-0.075	0	0	43	0	0	0	0	0	0	2019-02-14T01:00:00.000	1970-01-01T16:52:16.179	157	0	0	0	43	0	0	0	0	0	1	0.052	100	0	44	0	0	0
0	0	0	0	0	0	0	1	0	0	0	269.184	0	0	0	3.4	103.4	0	0	0	-0.075	0	0	43	0	0	0	0	0	0	2019-02-14T01:00:00.000	1970-01-01T16:52:16.179	157	0	0	0	43	0	0	0	0	0	1	0.052	100	0	44	0	0	0
0	0	0	0	0	0	0	1	0	0	0	269.184	0	0	0	3.4	103.4	0	0	0	-0.075	0	0	43	0	0	0	0	0	0	2019-02-14T01:00:00.000	1970-01-01T16:52:16.179	157	0	0	0	43	0	0	0	0	0	1	0.052	100	0	44	0	0	0
0	0	0	0	0	0	0	1	0	0	0	269.184	0	0	0	3.4	103.4	0	0	0	-0.075	0	0	43	0	0	0	0	0	0	2019-02-14T01:00:00.000	1970-01-01T16:52:16.179	157	0	0	0	43	0	0	0	0	0	1	0.052	100	0	44	0	0	0
0	0	0	0	0	0	0	1	0	0	0	269.184	0	0	0	3.4	103.4	0	0	0	-0.08	0	0	43	0	0	0	0	0	0	2019-02-14T01:00:00.000	1970-01-01T16:52:16.299	157	0	0	0	43	0	0	0	0	0	1	0.037	100	0	44	0	0	0
0	0	0	0	0	0	0	1	0	0	0	269.184	0	0	0	3.4	103.4	0	0	0	-0.08	0	0	43	0	0	0	0	0	0	2019-02-14T01:00:00.000	1970-01-01T16:52:16.299	157	0	0	0	43	0	0	0	0	0	1	0.037	100	0	44	0	0	0
0	0	0	0	0	0	0	1	0	0	0	269.184	0	0	0	3.4	103.4	0	0	0	-0.08	0	0	43	0	0	0	0	0	0	2019-02-14T01:00:00.000	1970-01-01T16:52:16.299	157	0	0	0	43	0	0	0	0	0	1	0.037	100	0	44	0	0	0
0	0	0	0	0	0	0	1	0	0	0	269.184	0	0	0	3.4	103.4	0	0	0	-0.08	0	0	43	0	0	0	0	0	0	2019-02-14T01:00:00.000	1970-01-01T16:52:16.299	157	0	0	0	43	0	0	0	0	0	1	0.037	100	0	44	0	0	0
0	0	0	0	0	0	0	1	0	0	0	269.184	0	0	0	3.4	103.4	0	0	0	-0.08	0	0	43	0	0	0	0	0	0	2019-02-14T01:00:00.000	1970-01-01T16:52:16.299	157	0	0	0	43	0	0	0	0	0	1	0.037	100	0	44	0	0	0
0	0	0	0	0	0	0	1	0	0	0	269.184	0	0	0	3.4	103.4	0	0	0	-0.085	0	0	43	0	0	0	0	0	0	2019-02-14T01:00:00.000	1970-01-01T16:52:16.419	157	0	0	0	43	0	0	0	0	0	1	0.06	100	0	44	0	0	0
0	0	0	0	0	0	0	1	0	0	0	269.184	0	0	0	3.4	103.4	0	0	0	-0.085	0	0	43	0	0	0	0	0	0	2019-02-14T01:00:00.000	1970-01-01T16:52:16.419	157	0	0	0	43	0	0	0	0	0	1	0.06	100	0	44	0	0	0
0	0	0	0	0	0	0	1	0	0	0	269.184	0	0	0	3.4	103.4	0	0	0	-0.085	0	0	43	0	0	0	0	0	0	2019-02-14T01:00:00.000	1970-01-01T16:52:16.419	157	0	0	0	43	0	0	0	0	0	1	0.06	100	0	44	0	0	0
0	0	0	0	0	0	0	1	0	0	0	269.184	0	0	0	3.4	103.4	0	0	0	-0.085	0	0	43	0	0	0	0	0	0	2019-02-14T01:00:00.000	1970-01-01T16:52:16.419	157	0	0	0	43	0	0	0	0	0	1	0.06	100	0	44	0	0	0
0	0	0	0	0	0	0	1	0	0	0	269.184	0	0	0	3.4	103.4	0	0	0	-0.085	0	0	43	0	0	0	0	0	0	2019-02-14T01:00:00.000	1970-01-01T16:52:16.419	157	0	0	0	43	0	0	0	0	0	1	0.06	100	0	44	0	0	0
0	0	0	0	0	0	0	1	0	0	0	269.184	0	0	0	3.4	103.4	0	0	0	-0.09	0	0	43	0	0	0	0	0	0	2019-02-14T01:00:00.000	1970-01-01T16:52:16.529	157	0	0	0	43	0	0	0	0	0	1	0.045	100	0	44	0	0	0
0	0	0	0	0	0	0	1	0	0	0	269.184	0	0	0	3.4	103.4	0	0	0	-0.09	0	0	43	0	0	0	0	0	0	2019-02-14T01:00:00.000	1970-01-01T16:52:16.529	157	0	0	0	43	0	0	0	0	0	1	0.045	100	0	44	0	0	0
0	0	0	0	0	0	0	1	0	0	0	269.184	0	0	0	3.4	103.4	0	0	0	-0.09	0	0	43	0	0	0	0	0	0	2019-02-14T01:00:00.000	1970-01-01T16:52:16.529	157	0	0	0	43	0	0	0	0	0	1	0.045	100	0	44	0	0	0
0	0	0	0	0	0	0	1	0	0	0	269.184	0	0	0	3.4	103.4	0	0	0	-0.09	0	0	43	0	0	0	0	0	0	2019-02-14T01:00:00.000	1970-01-01T16:52:16.529	157	0	0	0	43	0	0	0	0	0	1	0.045	100	0	44	0	0	0
0	0	0	0	0	0	0	1	0	0	0	269.184	0	0	0	3.4	103.4	0	0	0	-0.09	0	0	43	0	0	0	0	0	0	2019-02-14T01:00:00.000	1970-01-01T16:52:16.529	157	0	0	0	43	0	0	0	0	0	1	0.045	100	0	44	0	0	0
0	0	0	0	0	0	0	1	0	0	0	269.184	0	0	0	3.4	103.4	0	0	0	-0.09	0	0	43	0	0	0	0	0	0	2019-02-14T01:00:00.000	1970-01-01T16:52:16.649	157	0	0	0	43	0	0	0	0	0	1	0.037	100	0	44	0	0	0
0	0	0	0	0	0	0	1	0	0	0	269.184	0	0	0	3.4	103.4	0	0	0	-0.09	0	0	43	0	0	0	0	0	0	2019-02-14T01:00:00.000	1970-01-01T16:52:16.649	157	0	0	0	43	0	0	0	0	0	1	0.037	100	0	44	0	0	0
0	0	0	0	0	0	0	1	0	0	0	269.184	0	0	0	3.4	103.4	0	0	0	-0.09	0	0	43	0	0	0	0	0	0	2019-02-14T01:00:00.000	1970-01-01T16:52:16.649	157	0	0	0	43	0	0	0	0	0	1	0.037	100	0	44	0	0	0
0	0	0	0	0	0	0	1	0	0	0	269.184	0	0	0	3.4	103.4	0	0	0	-0.09	0	0	43	0	0	0	0	0	0	2019-02-14T01:00:00.000	1970-01-01T16:52:16.649	157	0	0	0	43	0	0	0	0	0	1	0.037	100	0	44	0	0	0
0	0	0	0	0	0	0	1	0	0	0	269.184	0	0	0	3.4	103.4	0	0	0	-0.09	0	0	43	0	0	0	0	0	0	2019-02-14T01:00:00.000	1970-01-01T16:52:16.649	157	0	0	0	43	0	0	0	0	0	1	0.037	100	0	44	0	0	0
0	0	0	0	0	0	0	1	0	0	0	269.184	0	0	0	3.4	103.4	0	0	0	-0.08	0	0	43	0	0	0	0	0	0	2019-02-14T01:00:00.000	1970-01-01T16:52:16.769	157	0	0	0	43	0	0	0	0	0	1	0.037	100	0	44	0	0	0
0	0	0	0	0	0	0	1	0	0	0	269.184	0	0	0	3.4	103.4	0	0	0	-0.08	0	0	43	0	0	0	0	0	0	2019-02-14T01:00:00.000	1970-01-01T16:52:16.769	157	0	0	0	43	0	0	0	0	0	1	0.037	100	0	44	0	0	0
0	0	0	0	0	0	0	1	0	0	0	269.184	0	0	0	3.4	103.4	0	0	0	-0.08	0	0	43	0	0	0	0	0	0	2019-02-14T01:00:00.000	1970-01-01T16:52:16.769	157	0	0	0	43	0	0	0	0	0	1	0.037	100	0	44	0	0	0
0	0	0	0	0	0	0	1	0	0	0	269.184	0	0	0	3.4	103.4	0	0	0	-0.08	0	0	43	0	0	0	0	0	0	2019-02-14T01:00:00.000	1970-01-01T16:52:16.769	157	0	0	0	43	0	0	0	0	0	1	0.037	100	0	44	0	0	0
0	0	0	0	0	0	0	1	0	0	0	269.184	0	0	0	3.4	103.4	0	0	0	-0.08	0	0	43	0	0	0	0	0	0	2019-02-14T01:00:00.000	1970-01-01T16:52:16.769	157	0	0	0	43	0	0	0	0	0	1	0.037	100	0	44	0	0	0
0	0	0	0	0	0	0	1	0	0	0	269.184	0	0	0	3.4	103.4	0	0	0	-0.08	0	0	43	0	0	0	0	0	0	2019-02-14T01:00:00.000	1970-01-01T16:52:16.889	157	0	0	0	43	0	0	0	0	0	1	0.045	100	0	44	0	0	0
0	0	0	0	0	0	0	1	0	0	0	269.184	0	0	0	3.4	103.4	0	0	0	-0.08	0	0	43	0	0	0	0	0	0	2019-02-14T01:00:00.000	1970-01-01T16:52:16.889	157	0	0	0	43	0	0	0	0	0	1	0.045	100	0	44	0	0	0
0	0	0	0	0	0	0	1	0	0	0	269.184	0	0	0	3.4	103.4	0	0	0	-0.08	0	0	43	0	0	0	0	0	0	2019-02-14T01:00:00.000	1970-01-01T16:52:16.889	157	0	0	0	43	0	0	0	0	0	1	0.045	100	0	44	0	0	0
0	0	0	0	0	0	0	1	0	0	0	269.184	0	0	0	3.4	103.4	0	0	0	-0.08	0	0	43	0	0	0	0	0	0	2019-02-14T01:00:00.000	1970-01-01T16:52:16.889	157	0	0	0	43	0	0	0	0	0	1	0.045	100	0	44	0	0	0
0	0	0	0	0	0	0	1	0	0	0	269.184	0	0	0	3.4	103.4	0	0	0	-0.08	0	0	43	0	0	0	0	0	0	2019-02-14T01:00:00.000	1970-01-01T16:52:16.889	157	0	0	0	43	0	0	0	0	0	1	0.045	100	0	44	0	0	0
0	0	0	0	0	0	0	1	0	0	0	269.184	0	0	0	3.4	103.4	0	0	0	-0.09	0	0	43	0	0	0	0	0	0	2019-02-14T01:00:00.000	1970-01-01T16:52:16.999	157	0	0	0	43	0	0	0	0	0	1	0.045	100	0	44	0	0	0
0	0	0	0	0	0	0	1	0	0	0	269.184	0	0	0	3.4	103.4	0	0	0	-0.09	0	0	43	0	0	0	0	0	0	2019-02-14T01:00:00.000	1970-01-01T16:52:16.999	157	0	0	0	43	0	0	0	0	0	1	0.045	100	0	44	0	0	0
0	0	0	0	0	0	0	1	0	0	0	269.184	0	0	0	3.4	103.4	0	0	0	-0.09	0	0	43	0	0	0	0	0	0	2019-02-14T01:00:00.000	1970-01-01T16:52:16.999	157	0	0	0	43	0	0	0	0	0	1	0.045	100	0	44	0	0	0
0	0	0	0	0	0	0	1	0	0	0	269.184	0	0	0	3.4	103.4	0	0	0	-0.09	0	0	43	0	0	0	0	0	0	2019-02-14T01:00:00.000	1970-01-01T16:52:16.999	157	0	0	0	43	0	0	0	0	0	1	0.045	100	0	44	0	0	0
0	0	0	0	0	0	0	1	0	0	0	269.184	0	0	0	3.4	103.4	0	0	0	-0.09	0	0	43	0	0	0	0	0	0	2019-02-14T01:00:00.000	1970-01-01T16:52:16.999	157	0	0	0	43	0	0	0	0	0	1	0.045	100	0	44	0	0	0
0	0	0	0	0	0	0	1	0	0	0	269.184	0	0	0	3.4	103.4	0	0	0	-0.095	0	0	43	0	0	0	0	0	0	2019-02-14T01:00:00.000	1970-01-01T16:52:17.119	157	0	0	0	43	0	0	0	0	0	1	0.045	100	0	44	0	0	0
0	0	0	0	0	0	0	1	0	0	0	269.184	0	0	0	3.4	103.4	0	0	0	-0.095	0	0	43	0	0	0	0	0	0	2019-02-14T01:00:00.000	1970-01-01T16:52:17.119	157	0	0	0	43	0	0	0	0	0	1	0.045	100	0	44	0	0	0
0	0	0	0	0	0	0	1	0	0	0	269.184	0	0	0	3.4	103.4	0	0	0	-0.095	0	0	43	0	0	0	0	0	0	2019-02-14T01:00:00.000	1970-01-01T16:52:17.119	157	0	0	0	43	0	0	0	0	0	1	0.045	100	0	44	0	0	0
0	0	0	0	0	0	0	1	0	0	0	269.184	0	0	0	3.4	103.4	0	0	0	-0.095	0	0	43	0	0	0	0	0	0	2019-02-14T01:00:00.000	1970-01-01T16:52:17.119	157	0	0	0	43	0	0	0	0	0	1	0.045	100	0	44	0	0	0
0	0	0	0	0	0	0	1	0	0	0	269.184	0	0	0	3.4	103.4	0	0	0	-0.095	0	0	43	0	0	0	0	0	0	2019-02-14T01:00:00.000	1970-01-01T16:52:17.119	157	0	0	0	43	0	0	0	0	0	1	0.045	100	0	44	0	0	0
0	0	0	0	0	0	0	1	0	0	0	269.184	0	0	0	3.4	103.4	0	0	0	-0.085	0	0	43	0	0	0	0	0	0	2019-02-14T01:00:00.000	1970-01-01T16:52:17.239	157	0	0	0	43	0	0	0	0	0	1	0.045	100	0	44	0	0	0
0	0	0	0	0	0	0	1	0	0	0	269.184	0	0	0	3.4	103.4	0	0	0	-0.085	0	0	43	0	0	0	0	0	0	2019-02-14T01:00:00.000	1970-01-01T16:52:17.239	157	0	0	0	43	0	0	0	0	0	1	0.045	100	0	44	0	0	0
0	0	0	0	0	0	0	1	0	0	0	269.184	0	0	0	3.4	103.4	0	0	0	-0.085	0	0	43	0	0	0	0	0	0	2019-02-14T01:00:00.000	1970-01-01T16:52:17.239	157	0	0	0	43	0	0	0	0	0	1	0.045	100	0	44	0	0	0
0	0	0	0	0	0	0	1	0	0	0	269.184	0	0	0	3.4	103.4	0	0	0	-0.085	0	0	43	0	0	0	0	0	0	2019-02-14T01:00:00.000	1970-01-01T16:52:17.239	157	0	0	0	43	0	0	0	0	0	1	0.045	100	0	44	0	0	0
0	0	0	0	0	0	0	1	0	0	0	269.184	0	0	0	3.4	103.4	0	0	0	-0.085	0	0	43	0	0	0	0	0	0	2019-02-14T01:00:00.000	1970-01-01T16:52:17.239	157	0	0	0	43	0	0	0	0	0	1	0.045	100	0	44	0	0	0
0	0	0	0	0	0	0	1	0	0	0	269.184	0	0	0	3.4	103.4	0	0	0	-0.09	0	0	43	0	0	0	0	0	0	2019-02-14T01:00:00.000	1970-01-01T16:52:17.359	157	0	0	0	43	0	0	0	0	0	1	0.037	100	0	44	0	0	0
0	0	0	0	0	0	0	1	0	0	0	269.184	0	0	0	3.4	103.4	0	0	0	-0.09	0	0	43	0	0	0	0	0	0	2019-02-14T01:00:00.000	1970-01-01T16:52:17.359	157	0	0	0	43	0	0	0	0	0	1	0.037	100	0	44	0	0	0
0	0	0	0	0	0	0	1	0	0	0	269.184	0	0	0	3.4	103.4	0	0	0	-0.09	0	0	43	0	0	0	0	0	0	2019-02-14T01:00:00.000	1970-01-01T16:52:17.359	157	0	0	0	43	0	0	0	0	0	1	0.037	100	0	44	0	0	0
0	0	0	0	0	0	0	1	0	0	0	269.184	0	0	0	3.4	103.4	0	0	0	-0.09	0	0	43	0	0	0	0	0	0	2019-02-14T01:00:00.000	1970-01-01T16:52:17.359	157	0	0	0	43	0	0	0	0	0	1	0.037	100	0	44	0	0	0
0	0	0	0	0	0	0	1	0	0	0	269.184	0	0	0	3.4	103.4	0	0	0	-0.09	0	0	43	0	0	0	0	0	0	2019-02-14T01:00:00.000	1970-01-01T16:52:17.359	157	0	0	0	43	0	0	0	0	0	1	0.037	100	0	44	0	0	0
0	0	0	0	0	0	0	1	0	0	0	269.184	0	0	0	3.4	103.4	0	0	0	-0.08	0	0	43	0	0	0	0	0	0	2019-02-14T01:00:00.000	1970-01-01T16:52:17.479	157	0	0	0	43	0	0	0	0	0	1	0.045	100	0	44	0	0	0
0	0	0	0	0	0	0	1	0	0	0	269.184	0	0	0	3.4	103.4	0	0	0	-0.08	0	0	43	0	0	0	0	0	0	2019-02-14T01:00:00.000	1970-01-01T16:52:17.479	157	0	0	0	43	0	0	0	0	0	1	0.045	100	0	44	0	0	0
0	0	0	0	0	0	0	1	0	0	0	269.184	0	0	0	3.4	103.4	0	0	0	-0.08	0	0	43	0	0	0	0	0	0	2019-02-14T01:00:00.000	1970-01-01T16:52:17.479	157	0	0	0	43	0	0	0	0	0	1	0.045	100	0	44	0	0	0
0	0	0	0	0	0	0	1	0	0	0	269.184	0	0	0	3.4	103.4	0	0	0	-0.08	0	0	43	0	0	0	0	0	0	2019-02-14T01:00:00.000	1970-01-01T16:52:17.479	157	0	0	0	43	0	0	0	0	0	1	0.045	100	0	44	0	0	0
0	0	0	0	0	0	0	1	0	0	0	269.184	0	0	0	3.4	103.4	0	0	0	-0.08	0	0	43	0	0	0	0	0	0	2019-02-14T01:00:00.000	1970-01-01T16:52:17.479	157	0	0	0	43	0	0	0	0	0	1	0.045	100	0	44	0	0	0
0	0	0	0	0	0	0	1	0	0	0	269.184	0	0	0	3.4	103.4	0	0	0	-0.08	0	0	43	0	0	0	0	0	0	2019-02-14T01:00:00.000	1970-01-01T16:52:17.589	157	0	0	0	43	0	0	0	0	0	1	0.037	100	0	44	0	0	0
0	0	0	0	0	0	0	1	0	0	0	269.184	0	0	0	3.4	103.4	0	0	0	-0.08	0	0	43	0	0	0	0	0	0	2019-02-14T01:00:00.000	1970-01-01T16:52:17.589	157	0	0	0	43	0	0	0	0	0	1	0.037	100	0	44	0	0	0
0	0	0	0	0	0	0	1	0	0	0	269.184	0	0	0	3.4	103.4	0	0	0	-0.08	0	0	43	0	0	0	0	0	0	2019-02-14T01:00:00.000	1970-01-01T16:52:17.589	157	0	0	0	43	0	0	0	0	0	1	0.037	100	0	44	0	0	0
0	0	0	0	0	0	0	1	0	0	0	269.184	0	0	0	3.4	103.4	0	0	0	-0.08	0	0	43	0	0	0	0	0	0	2019-02-14T01:00:00.000	1970-01-01T16:52:17.589	157	0	0	0	43	0	0	0	0	0	1	0.037	100	0	44	0	0	0
0	0	0	0	0	0	0	1	0	0	0	269.184	0	0	0	3.4	103.4	0	0	0	-0.085	0	0	43	0	0	0	0	0	0	2019-02-14T01:00:00.000	1970-01-01T16:52:17.699	157	0	0	0	43	0	0	0	0	0	1	0.037	100	0	44	0	0	0
0	0	0	0	0	0	0	1	0	0	0	269.184	0	0	0	3.4	103.4	0	0	0	-0.085	0	0	43	0	0	0	0	0	0	2019-02-14T01:00:00.000	1970-01-01T16:52:17.699	157	0	0	0	43	0	0	0	0	0	1	0.037	100	0	44	0	0	0
0	0	0	0	0	0	0	1	0	0	0	269.184	0	0	0	3.4	103.4	0	0	0	-0.085	0	0	43	0	0	0	0	0	0	2019-02-14T01:00:00.000	1970-01-01T16:52:17.699	157	0	0	0	43	0	0	0	0	0	1	0.037	100	0	44	0	0	0
0	0	0	0	0	0	0	1	0	0	0	269.184	0	0	0	3.4	103.4	0	0	0	-0.085	0	0	43	0	0	0	0	0	0	2019-02-14T01:00:00.000	1970-01-01T16:52:17.699	157	0	0	0	43	0	0	0	0	0	1	0.037	100	0	44	0	0	0
0	0	0	0	0	0	0	1	0	0	0	269.184	0	0	0	3.4	103.4	0	0	0	-0.085	0	0	43	0	0	0	0	0	0	2019-02-14T01:00:00.000	1970-01-01T16:52:17.699	157	0	0	0	43	0	0	0	0	0	1	0.037	100	0	44	0	0	0
0	0	0	0	0	0	0	1	0	0	0	269.184	0	0	0	3.4	103.4	0	0	0	-0.085	0	0	43	0	0	0	0	0	0	2019-02-14T01:00:00.000	1970-01-01T16:52:17.809	157	0	0	0	43	0	0	0	0	0	1	0.045	100	0	44	0	0	0
0	0	0	0	0	0	0	1	0	0	0	269.184	0	0	0	3.4	103.4	0	0	0	-0.085	0	0	43	0	0	0	0	0	0	2019-02-14T01:00:00.000	1970-01-01T16:52:17.809	157	0	0	0	43	0	0	0	0	0	1	0.045	100	0	44	0	0	0
0	0	0	0	0	0	0	1	0	0	0	269.184	0	0	0	3.4	103.4	0	0	0	-0.085	0	0	43	0	0	0	0	0	0	2019-02-14T01:00:00.000	1970-01-01T16:52:17.809	157	0	0	0	43	0	0	0	0	0	1	0.045	100	0	44	0	0	0
0	0	0	0	0	0	0	1	0	0	0	269.184	0	0	0	3.4	103.4	0	0	0	-0.085	0	0	43	0	0	0	0	0	0	2019-02-14T01:00:00.000	1970-01-01T16:52:17.809	157	0	0	0	43	0	0	0	0	0	1	0.045	100	0	44	0	0	0
0	0	0	0	0	0	0	1	0	0	0	269.184	0	0	0	3.4	103.4	0	0	0	-0.085	0	0	43	0	0	0	0	0	0	2019-02-14T01:00:00.000	1970-01-01T16:52:17.809	157	0	0	0	43	0	0	0	0	0	1	0.045	100	0	44	0	0	0
0	0	0	0	0	0	0	1	0	0	0	269.184	0	0	0	3.4	103.4	0	0	0	-0.095	0	0	43	0	0	0	0	0	0	2019-02-14T01:00:00.000	1970-01-01T16:52:17.929	157	0	0	0	43	0	0	0	0	0	1	0.037	100	0	44	0	0	0
0	0	0	0	0	0	0	1	0	0	0	269.184	0	0	0	3.4	103.4	0	0	0	-0.095	0	0	43	0	0	0	0	0	0	2019-02-14T01:00:00.000	1970-01-01T16:52:17.929	157	0	0	0	43	0	0	0	0	0	1	0.037	100	0	44	0	0	0
0	0	0	0	0	0	0	1	0	0	0	269.184	0	0	0	3.4	103.4	0	0	0	-0.095	0	0	43	0	0	0	0	0	0	2019-02-14T01:00:00.000	1970-01-01T16:52:17.929	157	0	0	0	43	0	0	0	0	0	1	0.037	100	0	44	0	0	0
0	0	0	0	0	0	0	1	0	0	0	269.184	0	0	0	3.4	103.4	0	0	0	-0.095	0	0	43	0	0	0	0	0	0	2019-02-14T01:00:00.000	1970-01-01T16:52:17.929	157	0	0	0	43	0	0	0	0	0	1	0.037	100	0	44	0	0	0
0	0	0	0	0	0	0	1	0	0	0	269.184	0	0	0	3.4	103.4	0	0	0	-0.095	0	0	43	0	0	0	0	0	0	2019-02-14T01:00:00.000	1970-01-01T16:52:17.929	157	0	0	0	43	0	0	0	0	0	1	0.037	100	0	44	0	0	0
0	0	0	0	0	0	0	1	0	0	0	269.184	0	0	0	3.4	103.4	0	0	0	-0.08	0	0	43	0	0	0	0	0	0	2019-02-14T01:00:00.000	1970-01-01T16:52:18.049	157	0	0	0	43	0	0	0	0	0	1	0.045	100	0	44	0	0	0
0	0	0	0	0	0	0	1	0	0	0	269.184	0	0	0	3.4	103.4	0	0	0	-0.08	0	0	43	0	0	0	0	0	0	2019-02-14T01:00:00.000	1970-01-01T16:52:18.049	157	0	0	0	43	0	0	0	0	0	1	0.045	100	0	44	0	0	0
0	0	0	0	0	0	0	1	0	0	0	269.184	0	0	0	3.4	103.4	0	0	0	-0.08	0	0	43	0	0	0	0	0	0	2019-02-14T01:00:00.000	1970-01-01T16:52:18.049	157	0	0	0	43	0	0	0	0	0	1	0.045	100	0	44	0	0	0
0	0	0	0	0	0	0	1	0	0	0	269.184	0	0	0	3.4	103.4	0	0	0	-0.08	0	0	43	0	0	0	0	0	0	2019-02-14T01:00:00.000	1970-01-01T16:52:18.049	157	0	0	0	43	0	0	0	0	0	1	0.045	100	0	44	0	0	0
0	0	0	0	0	0	0	1	0	0	0	269.184	0	0	0	3.4	103.4	0	0	0	-0.08	0	0	43	0	0	0	0	0	0	2019-02-14T01:00:00.000	1970-01-01T16:52:18.049	157	0	0	0	43	0	0	0	0	0	1	0.045	100	0	44	0	0	0
0	0	0	0	0	0	0	1	0	0	0	269.184	0	0	0	3.4	103.4	0	0	0	-0.075	0	0	43	0	0	0	0	0	0	2019-02-14T01:00:00.000	1970-01-01T16:52:18.159	157	0	0	0	43	0	0	0	0	0	1	0.045	100	0	44	0	0	0
0	0	0	0	0	0	0	1	0	0	0	269.184	0	0	0	3.4	103.4	0	0	0	-0.075	0	0	43	0	0	0	0	0	0	2019-02-14T01:00:00.000	1970-01-01T16:52:18.159	157	0	0	0	43	0	0	0	0	0	1	0.045	100	0	44	0	0	0
0	0	0	0	0	0	0	1	0	0	0	269.184	0	0	0	3.4	103.4	0	0	0	-0.075	0	0	43	0	0	0	0	0	0	2019-02-14T01:00:00.000	1970-01-01T16:52:18.159	157	0	0	0	43	0	0	0	0	0	1	0.045	100	0	44	0	0	0
0	0	0	0	0	0	0	1	0	0	0	269.184	0	0	0	3.4	103.4	0	0	0	-0.075	0	0	43	0	0	0	0	0	0	2019-02-14T01:00:00.000	1970-01-01T16:52:18.159	157	0	0	0	43	0	0	0	0	0	1	0.045	100	0	44	0	0	0
0	0	0	0	0	0	0	1	0	0	0	269.184	0	0	0	3.4	103.4	0	0	0	-0.075	0	0	43	0	0	0	0	0	0	2019-02-14T01:00:00.000	1970-01-01T16:52:18.159	157	0	0	0	43	0	0	0	0	0	1	0.045	100	0	44	0	0	0
0	0	0	0	0	0	0	1	0	0	0	269.184	0	0	0	3.4	103.4	0	0	0	-0.085	0	0	43	0	0	0	0	0	0	2019-02-14T01:00:00.000	1970-01-01T16:52:18.279	157	0	0	0	43	0	0	0	0	0	1	0.045	100	0	44	0	0	0
0	0	0	0	0	0	0	1	0	0	0	269.184	0	0	0	3.4	103.4	0	0	0	-0.085	0	0	43	0	0	0	0	0	0	2019-02-14T01:00:00.000	1970-01-01T16:52:18.279	157	0	0	0	43	0	0	0	0	0	1	0.045	100	0	44	0	0	0
0	0	0	0	0	0	0	1	0	0	0	269.184	0	0	0	3.4	103.4	0	0	0	-0.085	0	0	43	0	0	0	0	0	0	2019-02-14T01:00:00.000	1970-01-01T16:52:18.279	157	0	0	0	43	0	0	0	0	0	1	0.045	100	0	44	0	0	0
0	0	0	0	0	0	0	1	0	0	0	269.184	0	0	0	3.4	103.4	0	0	0	-0.085	0	0	43	0	0	0	0	0	0	2019-02-14T01:00:00.000	1970-01-01T16:52:18.279	157	0	0	0	43	0	0	0	0	0	1	0.045	100	0	44	0	0	0
0	0	0	0	0	0	0	1	0	0	0	269.184	0	0	0	3.4	103.4	0	0	0	-0.085	0	0	43	0	0	0	0	0	0	2019-02-14T01:00:00.000	1970-01-01T16:52:18.279	157	0	0	0	43	0	0	0	0	0	1	0.045	100	0	44	0	0	0
0	0	0	0	0	0	0	1	0	0	0	269.184	0	0	0	3.4	103.4	0	0	0	-0.09	0	0	43	0	0	0	0	0	0	2019-02-14T01:00:00.000	1970-01-01T16:52:18.399	157	0	0	0	43	0	0	0	0	0	1	0.052	100	0	44	0	0	0
0	0	0	0	0	0	0	1	0	0	0	269.184	0	0	0	3.4	103.4	0	0	0	-0.09	0	0	43	0	0	0	0	0	0	2019-02-14T01:00:00.000	1970-01-01T16:52:18.399	157	0	0	0	43	0	0	0	0	0	1	0.052	100	0	44	0	0	0
0	0	0	0	0	0	0	1	0	0	0	269.184	0	0	0	3.4	103.4	0	0	0	-0.09	0	0	43	0	0	0	0	0	0	2019-02-14T01:00:00.000	1970-01-01T16:52:18.399	157	0	0	0	43	0	0	0	0	0	1	0.052	100	0	44	0	0	0
0	0	0	0	0	0	0	1	0	0	0	269.184	0	0	0	3.4	103.4	0	0	0	-0.09	0	0	43	0	0	0	0	0	0	2019-02-14T01:00:00.000	1970-01-01T16:52:18.399	157	0	0	0	43	0	0	0	0	0	1	0.052	100	0	44	0	0	0
0	0	0	0	0	0	0	1	0	0	0	269.184	0	0	0	3.4	103.4	0	0	0	-0.09	0	0	43	0	0	0	0	0	0	2019-02-14T01:00:00.000	1970-01-01T16:52:18.399	157	0	0	0	43	0	0	0	0	0	1	0.052	100	0	44	0	0	0
0	0	0	0	0	0	0	1	0	0	0	269.184	0	0	0	3.4	103.4	0	0	0	-0.085	0	0	43	0	0	0	0	0	0	2019-02-14T01:00:00.000	1970-01-01T16:52:18.509	157	0	0	0	43	0	0	0	0	0	1	0.052	100	0	44	0	0	0
0	0	0	0	0	0	0	1	0	0	0	269.184	0	0	0	3.4	103.4	0	0	0	-0.085	0	0	43	0	0	0	0	0	0	2019-02-14T01:00:00.000	1970-01-01T16:52:18.509	157	0	0	0	43	0	0	0	0	0	1	0.052	100	0	44	0	0	0
0	0	0	0	0	0	0	1	0	0	0	269.184	0	0	0	3.4	103.4	0	0	0	-0.085	0	0	43	0	0	0	0	0	0	2019-02-14T01:00:00.000	1970-01-01T16:52:18.509	157	0	0	0	43	0	0	0	0	0	1	0.052	100	0	44	0	0	0
0	0	0	0	0	0	0	1	0	0	0	269.184	0	0	0	3.4	103.4	0	0	0	-0.085	0	0	43	0	0	0	0	0	0	2019-02-14T01:00:00.000	1970-01-01T16:52:18.509	157	0	0	0	43	0	0	0	0	0	1	0.052	100	0	44	0	0	0
0	0	0	0	0	0	0	1	0	0	0	269.184	0	0	0	3.4	103.4	0	0	0	-0.085	0	0	43	0	0	0	0	0	0	2019-02-14T01:00:00.000	1970-01-01T16:52:18.509	157	0	0	0	43	0	0	0	0	0	1	0.052	100	0	44	0	0	0
0	0	0	0	0	0	0	1	0	0	0	269.184	0	0	0	3.4	103.4	0	0	0	-0.085	0	0	43	0	0	0	0	0	0	2019-02-14T01:00:00.000	1970-01-01T16:52:18.629	157	0	0	0	43	0	0	0	0	0	1	0.045	100	0	44	0	0	0
0	0	0	0	0	0	0	1	0	0	0	269.184	0	0	0	3.4	103.4	0	0	0	-0.085	0	0	43	0	0	0	0	0	0	2019-02-14T01:00:00.000	1970-01-01T16:52:18.629	157	0	0	0	43	0	0	0	0	0	1	0.045	100	0	44	0	0	0
0	0	0	0	0	0	0	1	0	0	0	269.184	0	0	0	3.4	103.4	0	0	0	-0.085	0	0	43	0	0	0	0	0	0	2019-02-14T01:00:00.000	1970-01-01T16:52:18.629	157	0	0	0	43	0	0	0	0	0	1	0.045	100	0	44	0	0	0
0	0	0	0	0	0	0	1	0	0	0	269.184	0	0	0	3.4	103.4	0	0	0	-0.085	0	0	43	0	0	0	0	0	0	2019-02-14T01:00:00.000	1970-01-01T16:52:18.629	157	0	0	0	43	0	0	0	0	0	1	0.045	100	0	44	0	0	0
0	0	0	0	0	0	0	1	0	0	0	269.184	0	0	0	3.4	103.4	0	0	0	-0.085	0	0	43	0	0	0	0	0	0	2019-02-14T01:00:00.000	1970-01-01T16:52:18.629	157	0	0	0	43	0	0	0	0	0	1	0.045	100	0	44	0	0	0
0	0	0	0	0	0	0	1	0	0	0	269.184	0	0	0	3.4	103.4	0	0	0	-0.08	0	0	43	0	0	0	0	0	0	2019-02-14T01:00:00.000	1970-01-01T16:52:18.749	157	0	0	0	43	0	0	0	0	0	1	0.037	100	0	44	0	0	0
0	0	0	0	0	0	0	1	0	0	0	269.184	0	0	0	3.4	103.4	0	0	0	-0.08	0	0	43	0	0	0	0	0	0	2019-02-14T01:00:00.000	1970-01-01T16:52:18.749	157	0	0	0	43	0	0	0	0	0	1	0.037	100	0	44	0	0	0
0	0	0	0	0	0	0	1	0	0	0	269.184	0	0	0	3.4	103.4	0	0	0	-0.08	0	0	43	0	0	0	0	0	0	2019-02-14T01:00:00.000	1970-01-01T16:52:18.749	157	0	0	0	43	0	0	0	0	0	1	0.037	100	0	44	0	0	0
0	0	0	0	0	0	0	1	0	0	0	269.184	0	0	0	3.4	103.4	0	0	0	-0.08	0	0	43	0	0	0	0	0	0	2019-02-14T01:00:00.000	1970-01-01T16:52:18.749	157	0	0	0	43	0	0	0	0	0	1	0.037	100	0	44	0	0	0
0	0	0	0	0	0	0	1	0	0	0	269.184	0	0	0	3.4	103.4	0	0	0	-0.08	0	0	43	0	0	0	0	0	0	2019-02-14T01:00:00.000	1970-01-01T16:52:18.749	157	0	0	0	43	0	0	0	0	0	1	0.037	100	0	44	0	0	0
0	0	0	0	0	0	0	1	0	0	0	269.184	0	0	0	3.4	103.4	0	0	0	-0.09	0	0	43	0	0	0	0	0	0	2019-02-14T01:00:00.000	1970-01-01T16:52:18.869	157	0	0	0	43	0	0	0	0	0	1	0.037	100	0	44	0	0	0
0	0	0	0	0	0	0	1	0	0	0	269.184	0	0	0	3.4	103.4	0	0	0	-0.09	0	0	43	0	0	0	0	0	0	2019-02-14T01:00:00.000	1970-01-01T16:52:18.869	157	0	0	0	43	0	0	0	0	0	1	0.037	100	0	44	0	0	0
0	0	0	0	0	0	0	1	0	0	0	269.184	0	0	0	3.4	103.4	0	0	0	-0.09	0	0	43	0	0	0	0	0	0	2019-02-14T01:00:00.000	1970-01-01T16:52:18.869	157	0	0	0	43	0	0	0	0	0	1	0.037	100	0	44	0	0	0
0	0	0	0	0	0	0	1	0	0	0	269.184	0	0	0	3.4	103.4	0	0	0	-0.09	0	0	43	0	0	0	0	0	0	2019-02-14T01:00:00.000	1970-01-01T16:52:18.869	157	0	0	0	43	0	0	0	0	0	1	0.037	100	0	44	0	0	0
0	0	0	0	0	0	0	1	0	0	0	269.184	0	0	0	3.4	103.4	0	0	0	-0.09	0	0	43	0	0	0	0	0	0	2019-02-14T01:00:00.000	1970-01-01T16:52:18.869	157	0	0	0	43	0	0	0	0	0	1	0.037	100	0	44	0	0	0
0	0	0	0	0	0	0	1	0	0	0	269.184	0	0	0	3.4	103.4	0	0	0	-0.09	0	0	43	0	0	0	0	0	0	2019-02-14T01:00:00.000	1970-01-01T16:52:18.989	157	0	0	0	43	0	0	0	0	0	1	0.052	100	0	44	0	0	0
0	0	0	0	0	0	0	1	0	0	0	269.184	0	0	0	3.4	103.4	0	0	0	-0.09	0	0	43	0	0	0	0	0	0	2019-02-14T01:00:00.000	1970-01-01T16:52:18.989	157	0	0	0	43	0	0	0	0	0	1	0.052	100	0	44	0	0	0
0	0	0	0	0	0	0	1	0	0	0	269.184	0	0	0	3.4	103.4	0	0	0	-0.09	0	0	43	0	0	0	0	0	0	2019-02-14T01:00:00.000	1970-01-01T16:52:18.989	157	0	0	0	43	0	0	0	0	0	1	0.052	100	0	44	0	0	0
0	0	0	0	0	0	0	1	0	0	0	269.184	0	0	0	3.4	103.4	0	0	0	-0.09	0	0	43	0	0	0	0	0	0	2019-02-14T01:00:00.000	1970-01-01T16:52:18.989	157	0	0	0	43	0	0	0	0	0	1	0.052	100	0	44	0	0	0
0	0	0	0	0	0	0	1	0	0	0	269.184	0	0	0	3.4	103.4	0	0	0	-0.09	0	0	43	0	0	0	0	0	0	2019-02-14T01:00:00.000	1970-01-01T16:52:18.989	157	0	0	0	43	0	0	0	0	0	1	0.052	100	0	44	0	0	0
0	0	0	0	0	0	0	1	0	0	0	269.184	0	0	0	3.4	103.4	0	0	0	-0.08	0	0	43	0	0	0	0	0	0	2019-02-14T01:00:00.000	1970-01-01T16:52:19.099	157	0	0	0	43	0	0	0	0	0	1	0.045	100	0	44	0	0	0
0	0	0	0	0	0	0	1	0	0	0	269.184	0	0	0	3.4	103.4	0	0	0	-0.08	0	0	43	0	0	0	0	0	0	2019-02-14T01:00:00.000	1970-01-01T16:52:19.099	157	0	0	0	43	0	0	0	0	0	1	0.045	100	0	44	0	0	0
0	0	0	0	0	0	0	1	0	0	0	269.184	0	0	0	3.4	103.4	0	0	0	-0.08	0	0	43	0	0	0	0	0	0	2019-02-14T01:00:00.000	1970-01-01T16:52:19.099	157	0	0	0	43	0	0	0	0	0	1	0.045	100	0	44	0	0	0
0	0	0	0	0	0	0	1	0	0	0	269.184	0	0	0	3.4	103.4	0	0	0	-0.08	0	0	43	0	0	0	0	0	0	2019-02-14T01:00:00.000	1970-01-01T16:52:19.099	157	0	0	0	43	0	0	0	0	0	1	0.045	100	0	44	0	0	0
0	0	0	0	0	0	0	1	0	0	0	269.184	0	0	0	3.4	103.4	0	0	0	-0.08	0	0	43	0	0	0	0	0	0	2019-02-14T01:00:00.000	1970-01-01T16:52:19.099	157	0	0	0	43	0	0	0	0	0	1	0.045	100	0	44	0	0	0
0	0	0	0	0	0	0	1	0	0	0	269.184	0	0	0	3.4	103.4	0	0	0	-0.075	0	0	43	0	0	0	0	0	0	2019-02-14T01:00:00.000	1970-01-01T16:52:19.219	157	0	0	0	43	0	0	0	0	0	1	0.045	100	0	44	0	0	0
0	0	0	0	0	0	0	1	0	0	0	269.184	0	0	0	3.4	103.4	0	0	0	-0.075	0	0	43	0	0	0	0	0	0	2019-02-14T01:00:00.000	1970-01-01T16:52:19.219	157	0	0	0	43	0	0	0	0	0	1	0.045	100	0	44	0	0	0
0	0	0	0	0	0	0	1	0	0	0	269.184	0	0	0	3.4	103.4	0	0	0	-0.075	0	0	43	0	0	0	0	0	0	2019-02-14T01:00:00.000	1970-01-01T16:52:19.219	157	0	0	0	43	0	0	0	0	0	1	0.045	100	0	44	0	0	0
0	0	0	0	0	0	0	1	0	0	0	269.184	0	0	0	3.4	103.4	0	0	0	-0.075	0	0	43	0	0	0	0	0	0	2019-02-14T01:00:00.000	1970-01-01T16:52:19.219	157	0	0	0	43	0	0	0	0	0	1	0.045	100	0	44	0	0	0
0	0	0	0	0	0	0	1	0	0	0	269.184	0	0	0	3.4	103.4	0	0	0	-0.075	0	0	43	0	0	0	0	0	0	2019-02-14T01:00:00.000	1970-01-01T16:52:19.219	157	0	0	0	43	0	0	0	0	0	1	0.045	100	0	44	0	0	0
0	0	0	0	0	0	0	1	0	0	0	269.184	0	0	0	3.4	103.4	0	0	0	-0.085	0	0	43	0	0	0	0	0	0	2019-02-14T01:00:00.000	1970-01-01T16:52:19.339	157	0	0	0	43	0	0	0	0	0	1	0.037	100	0	44	0	0	0
0	0	0	0	0	0	0	1	0	0	0	269.184	0	0	0	3.4	103.4	0	0	0	-0.085	0	0	43	0	0	0	0	0	0	2019-02-14T01:00:00.000	1970-01-01T16:52:19.339	157	0	0	0	43	0	0	0	0	0	1	0.037	100	0	44	0	0	0
0	0	0	0	0	0	0	1	0	0	0	269.184	0	0	0	3.4	103.4	0	0	0	-0.085	0	0	43	0	0	0	0	0	0	2019-02-14T01:00:00.000	1970-01-01T16:52:19.339	157	0	0	0	43	0	0	0	0	0	1	0.037	100	0	44	0	0	0
0	0	0	0	0	0	0	1	0	0	0	269.184	0	0	0	3.4	103.4	0	0	0	-0.085	0	0	43	0	0	0	0	0	0	2019-02-14T01:00:00.000	1970-01-01T16:52:19.339	157	0	0	0	43	0	0	0	0	0	1	0.037	100	0	44	0	0	0
0	0	0	0	0	0	0	1	0	0	0	269.184	0	0	0	3.4	103.4	0	0	0	-0.085	0	0	43	0	0	0	0	0	0	2019-02-14T01:00:00.000	1970-01-01T16:52:19.339	157	0	0	0	43	0	0	0	0	0	1	0.037	100	0	44	0	0	0
0	0	0	0	0	0	0	1	0	0	0	269.184	0	0	0	3.4	103.4	0	0	0	-0.09	0	0	43	0	0	0	0	0	0	2019-02-14T01:00:00.000	1970-01-01T16:52:19.459	157	0	0	0	43	0	0	0	0	0	1	0.052	100	0	44	0	0	0
0	0	0	0	0	0	0	1	0	0	0	269.184	0	0	0	3.4	103.4	0	0	0	-0.09	0	0	43	0	0	0	0	0	0	2019-02-14T01:00:00.000	1970-01-01T16:52:19.459	157	0	0	0	43	0	0	0	0	0	1	0.052	100	0	44	0	0	0
0	0	0	0	0	0	0	1	0	0	0	269.184	0	0	0	3.4	103.4	0	0	0	-0.09	0	0	43	0	0	0	0	0	0	2019-02-14T01:00:00.000	1970-01-01T16:52:19.459	157	0	0	0	43	0	0	0	0	0	1	0.052	100	0	44	0	0	0
0	0	0	0	0	0	0	1	0	0	0	269.184	0	0	0	3.4	103.4	0	0	0	-0.09	0	0	43	0	0	0	0	0	0	2019-02-14T01:00:00.000	1970-01-01T16:52:19.459	157	0	0	0	43	0	0	0	0	0	1	0.052	100	0	44	0	0	0
0	0	0	0	0	0	0	1	0	0	0	269.184	0	0	0	3.4	103.4	0	0	0	-0.09	0	0	43	0	0	0	0	0	0	2019-02-14T01:00:00.000	1970-01-01T16:52:19.459	157	0	0	0	43	0	0	0	0	0	1	0.052	100	0	44	0	0	0
0	0	0	0	0	0	0	1	0	0	0	269.184	0	0	0	3.4	103.4	0	0	0	-0.09	0	0	43	0	0	0	0	0	0	2019-02-14T01:00:00.000	1970-01-01T16:52:19.569	157	0	0	0	43	0	0	0	0	0	1	0.037	100	0	44	0	0	0
0	0	0	0	0	0	0	1	0	0	0	269.184	0	0	0	3.4	103.4	0	0	0	-0.09	0	0	43	0	0	0	0	0	0	2019-02-14T01:00:00.000	1970-01-01T16:52:19.569	157	0	0	0	43	0	0	0	0	0	1	0.037	100	0	44	0	0	0
0	0	0	0	0	0	0	1	0	0	0	269.184	0	0	0	3.4	103.4	0	0	0	-0.09	0	0	43	0	0	0	0	0	0	2019-02-14T01:00:00.000	1970-01-01T16:52:19.569	157	0	0	0	43	0	0	0	0	0	1	0.037	100	0	44	0	0	0
0	0	0	0	0	0	0	1	0	0	0	269.184	0	0	0	3.4	103.4	0	0	0	-0.09	0	0	43	0	0	0	0	0	0	2019-02-14T01:00:00.000	1970-01-01T16:52:19.569	157	0	0	0	43	0	0	0	0	0	1	0.037	100	0	44	0	0	0
0	0	0	0	0	0	0	1	0	0	0	269.184	0	0	0	3.4	103.4	0	0	0	-0.09	0	0	43	0	0	0	0	0	0	2019-02-14T01:00:00.000	1970-01-01T16:52:19.569	157	0	0	0	43	0	0	0	0	0	1	0.037	100	0	44	0	0	0
0	0	0	0	0	0	0	1	0	0	0	269.184	0	0	0	3.4	103.4	0	0	0	-0.07	0	0	43	0	0	0	0	0	0	2019-02-14T01:00:00.000	1970-01-01T16:52:19.689	157	0	0	0	43	0	0	0	0	0	1	0.022	100	0	44	0	0	0
0	0	0	0	0	0	0	1	0	0	0	269.184	0	0	0	3.4	103.4	0	0	0	-0.07	0	0	43	0	0	0	0	0	0	2019-02-14T01:00:00.000	1970-01-01T16:52:19.689	157	0	0	0	43	0	0	0	0	0	1	0.022	100	0	44	0	0	0
0	0	0	0	0	0	0	1	0	0	0	269.184	0	0	0	3.4	103.4	0	0	0	-0.07	0	0	43	0	0	0	0	0	0	2019-02-14T01:00:00.000	1970-01-01T16:52:19.689	157	0	0	0	43	0	0	0	0	0	1	0.022	100	0	44	0	0	0
0	0	0	0	0	0	0	1	0	0	0	269.184	0	0	0	3.4	103.4	0	0	0	-0.07	0	0	43	0	0	0	0	0	0	2019-02-14T01:00:00.000	1970-01-01T16:52:19.689	157	0	0	0	43	0	0	0	0	0	1	0.022	100	0	44	0	0	0
0	0	0	0	0	0	0	1	0	0	0	269.184	0	0	0	3.4	103.4	0	0	0	-0.07	0	0	43	0	0	0	0	0	0	2019-02-14T01:00:00.000	1970-01-01T16:52:19.689	157	0	0	0	43	0	0	0	0	0	1	0.022	100	0	44	0	0	0
0	0	0	0	0	0	0	1	0	0	0	269.184	0	0	0	3.4	103.4	0	0	0	-0.085	0	0	43	0	0	0	0	0	0	2019-02-14T01:00:00.000	1970-01-01T16:52:19.809	157	0	0	0	43	0	0	0	0	0	1	0.045	100	0	44	0	0	0
0	0	0	0	0	0	0	1	0	0	0	269.184	0	0	0	3.4	103.4	0	0	0	-0.085	0	0	43	0	0	0	0	0	0	2019-02-14T01:00:00.000	1970-01-01T16:52:19.809	157	0	0	0	43	0	0	0	0	0	1	0.045	100	0	44	0	0	0
0	0	0	0	0	0	0	1	0	0	0	269.184	0	0	0	3.4	103.4	0	0	0	-0.085	0	0	43	0	0	0	0	0	0	2019-02-14T01:00:00.000	1970-01-01T16:52:19.809	157	0	0	0	43	0	0	0	0	0	1	0.045	100	0	44	0	0	0
0	0	0	0	0	0	0	1	0	0	0	269.184	0	0	0	3.4	103.4	0	0	0	-0.085	0	0	43	0	0	0	0	0	0	2019-02-14T01:00:00.000	1970-01-01T16:52:19.809	157	0	0	0	43	0	0	0	0	0	1	0.045	100	0	44	0	0	0
0	0	0	0	0	0	0	1	0	0	0	269.184	0	0	0	3.4	103.4	0	0	0	-0.085	0	0	43	0	0	0	0	0	0	2019-02-14T01:00:00.000	1970-01-01T16:52:19.809	157	0	0	0	43	0	0	0	0	0	1	0.045	100	0	44	0	0	0
0	0	0	0	0	0	0	1	0	0	0	269.184	0	0	0	3.4	103.4	0	0	0	-0.095	0	0	43	0	0	0	0	0	0	2019-02-14T01:00:00.000	1970-01-01T16:52:19.929	157	0	0	0	43	0	0	0	0	0	1	0.052	100	0	44	0	0	0
0	0	0	0	0	0	0	1	0	0	0	269.184	0	0	0	3.4	103.4	0	0	0	-0.095	0	0	43	0	0	0	0	0	0	2019-02-14T01:00:00.000	1970-01-01T16:52:19.929	157	0	0	0	43	0	0	0	0	0	1	0.052	100	0	44	0	0	0
0	0	0	0	0	0	0	1	0	0	0	269.184	0	0	0	3.4	103.4	0	0	0	-0.095	0	0	43	0	0	0	0	0	0	2019-02-14T01:00:00.000	1970-01-01T16:52:19.929	157	0	0	0	43	0	0	0	0	0	1	0.052	100	0	44	0	0	0
0	0	0	0	0	0	0	1	0	0	0	269.184	0	0	0	3.4	103.4	0	0	0	-0.095	0	0	43	0	0	0	0	0	0	2019-02-14T01:00:00.000	1970-01-01T16:52:19.929	157	0	0	0	43	0	0	0	0	0	1	0.052	100	0	44	0	0	0
0	0	0	0	0	0	0	1	0	0	0	269.184	0	0	0	3.4	103.4	0	0	0	-0.095	0	0	43	0	0	0	0	0	0	2019-02-14T01:00:00.000	1970-01-01T16:52:19.929	157	0	0	0	43	0	0	0	0	0	1	0.052	100	0	44	0	0	0
0	0	0	0	0	0	0	1	0	0	0	269.184	0	0	0	3.4	103.4	0	0	0	-0.085	0	0	43	0	0	0	0	0	0	2019-02-14T01:00:00.000	1970-01-01T16:52:20.049	157	0	0	0	43	0	0	0	0	0	1	0.045	100	0	44	0	0	0
0	0	0	0	0	0	0	1	0	0	0	269.184	0	0	0	3.4	103.4	0	0	0	-0.085	0	0	43	0	0	0	0	0	0	2019-02-14T01:00:00.000	1970-01-01T16:52:20.049	157	0	0	0	43	0	0	0	0	0	1	0.045	100	0	44	0	0	0
0	0	0	0	0	0	0	1	0	0	0	269.184	0	0	0	3.4	103.4	0	0	0	-0.085	0	0	43	0	0	0	0	0	0	2019-02-14T01:00:00.000	1970-01-01T16:52:20.049	157	0	0	0	43	0	0	0	0	0	1	0.045	100	0	44	0	0	0
0	0	0	0	0	0	0	1	0	0	0	269.184	0	0	0	3.4	103.4	0	0	0	-0.085	0	0	43	0	0	0	0	0	0	2019-02-14T01:00:00.000	1970-01-01T16:52:20.049	157	0	0	0	43	0	0	0	0	0	1	0.045	100	0	44	0	0	0
0	0	0	0	0	0	0	1	0	0	0	269.184	0	0	0	3.4	103.4	0	0	0	-0.085	0	0	43	0	0	0	0	0	0	2019-02-14T01:00:00.000	1970-01-01T16:52:20.049	157	0	0	0	43	0	0	0	0	0	1	0.045	100	0	44	0	0	0
0	0	0	0	0	0	0	1	0	0	0	269.184	0	0	0	3.4	103.4	0	0	0	-0.085	0	0	43	0	0	0	0	0	0	2019-02-14T01:00:00.000	1970-01-01T16:52:20.169	157	0	0	0	43	0	0	0	0	0	1	0.037	100	0	44	0	0	0
0	0	0	0	0	0	0	1	0	0	0	269.184	0	0	0	3.4	103.4	0	0	0	-0.085	0	0	43	0	0	0	0	0	0	2019-02-14T01:00:00.000	1970-01-01T16:52:20.169	157	0	0	0	43	0	0	0	0	0	1	0.037	100	0	44	0	0	0
0	0	0	0	0	0	0	1	0	0	0	269.184	0	0	0	3.4	103.4	0	0	0	-0.085	0	0	43	0	0	0	0	0	0	2019-02-14T01:00:00.000	1970-01-01T16:52:20.169	157	0	0	0	43	0	0	0	0	0	1	0.037	100	0	44	0	0	0
0	0	0	0	0	0	0	1	0	0	0	269.184	0	0	0	3.4	103.4	0	0	0	-0.085	0	0	43	0	0	0	0	0	0	2019-02-14T01:00:00.000	1970-01-01T16:52:20.169	157	0	0	0	43	0	0	0	0	0	1	0.037	100	0	44	0	0	0
0	0	0	0	0	0	0	1	0	0	0	269.184	0	0	0	3.4	103.4	0	0	0	-0.085	0	0	43	0	0	0	0	0	0	2019-02-14T01:00:00.000	1970-01-01T16:52:20.169	157	0	0	0	43	0	0	0	0	0	1	0.037	100	0	44	0	0	0
0	0	0	0	0	0	0	1	0	0	0	269.184	0	0	0	3.4	103.4	0	0	0	-0.085	0	0	43	0	0	0	0	0	0	2019-02-14T01:00:00.000	1970-01-01T16:52:20.489	157	0	0	0	43	0	0	0	0	0	1	0.052	100	0	44	0	0	0
0	0	0	0	0	0	0	1	0	0	0	269.184	0	0	0	3.4	103.4	0	0	0	-0.085	0	0	43	0	0	0	0	0	0	2019-02-14T01:00:00.000	1970-01-01T16:52:20.489	157	0	0	0	43	0	0	0	0	0	1	0.052	100	0	44	0	0	0
0	0	0	0	0	0	0	1	0	0	0	269.184	0	0	0	3.4	103.4	0	0	0	-0.085	0	0	43	0	0	0	0	0	0	2019-02-14T01:00:00.000	1970-01-01T16:52:20.489	157	0	0	0	43	0	0	0	0	0	1	0.052	100	0	44	0	0	0
0	0	0	0	0	0	0	1	0	0	0	269.184	0	0	0	3.4	103.4	0	0	0	-0.085	0	0	43	0	0	0	0	0	0	2019-02-14T01:00:00.000	1970-01-01T16:52:20.489	157	0	0	0	43	0	0	0	0	0	1	0.052	100	0	44	0	0	0
0	0	0	0	0	0	0	1	0	0	0	269.184	0	0	0	3.4	103.4	0	0	0	-0.085	0	0	43	0	0	0	0	0	0	2019-02-14T01:00:00.000	1970-01-01T16:52:20.489	157	0	0	0	43	0	0	0	0	0	1	0.052	100	0	44	0	0	0
0	0	0	0	0	0	0	1	0	0	0	269.184	0	0	0	3.4	103.4	0	0	0	-0.08	0	0	43	0	0	0	0	0	0	2019-02-14T01:00:00.000	1970-01-01T16:52:20.609	157	0	0	0	43	0	0	0	0	0	1	0.03	100	0	44	0	0	0
0	0	0	0	0	0	0	1	0	0	0	269.184	0	0	0	3.4	103.4	0	0	0	-0.08	0	0	43	0	0	0	0	0	0	2019-02-14T01:00:00.000	1970-01-01T16:52:20.609	157	0	0	0	43	0	0	0	0	0	1	0.03	100	0	44	0	0	0
0	0	0	0	0	0	0	1	0	0	0	269.184	0	0	0	3.4	103.4	0	0	0	-0.08	0	0	43	0	0	0	0	0	0	2019-02-14T01:00:00.000	1970-01-01T16:52:20.609	157	0	0	0	43	0	0	0	0	0	1	0.03	100	0	44	0	0	0
0	0	0	0	0	0	0	1	0	0	0	269.184	0	0	0	3.4	103.4	0	0	0	-0.08	0	0	43	0	0	0	0	0	0	2019-02-14T01:00:00.000	1970-01-01T16:52:20.609	157	0	0	0	43	0	0	0	0	0	1	0.03	100	0	44	0	0	0
0	0	0	0	0	0	0	1	0	0	0	269.184	0	0	0	3.4	103.4	0	0	0	-0.08	0	0	43	0	0	0	0	0	0	2019-02-14T01:00:00.000	1970-01-01T16:52:20.609	157	0	0	0	43	0	0	0	0	0	1	0.03	100	0	44	0	0	0
0	0	0	0	0	0	0	1	0	0	0	269.184	0	0	0	3.4	103.4	0	0	0	-0.085	0	0	43	0	0	0	0	0	0	2019-02-14T01:00:00.000	1970-01-01T16:52:20.729	157	0	0	0	43	0	0	0	0	0	1	0.045	100	0	44	0	0	0
0	0	0	0	0	0	0	1	0	0	0	269.184	0	0	0	3.4	103.4	0	0	0	-0.085	0	0	43	0	0	0	0	0	0	2019-02-14T01:00:00.000	1970-01-01T16:52:20.729	157	0	0	0	43	0	0	0	0	0	1	0.045	100	0	44	0	0	0
0	0	0	0	0	0	0	1	0	0	0	269.184	0	0	0	3.4	103.4	0	0	0	-0.085	0	0	43	0	0	0	0	0	0	2019-02-14T01:00:00.000	1970-01-01T16:52:20.729	157	0	0	0	43	0	0	0	0	0	1	0.045	100	0	44	0	0	0
0	0	0	0	0	0	0	1	0	0	0	269.184	0	0	0	3.4	103.4	0	0	0	-0.085	0	0	43	0	0	0	0	0	0	2019-02-14T01:00:00.000	1970-01-01T16:52:20.729	157	0	0	0	43	0	0	0	0	0	1	0.045	100	0	44	0	0	0
0	0	0	0	0	0	0	1	0	0	0	269.184	0	0	0	3.4	103.4	0	0	0	-0.085	0	0	43	0	0	0	0	0	0	2019-02-14T01:00:00.000	1970-01-01T16:52:20.729	157	0	0	0	43	0	0	0	0	0	1	0.045	100	0	44	0	0	0
0	0	0	0	0	0	0	1	0	0	0	269.184	0	0	0	3.4	103.4	0	0	0	-0.085	0	0	43	0	0	0	0	0	0	2019-02-14T01:00:00.000	1970-01-01T16:52:20.849	157	0	0	0	43	0	0	0	0	0	1	0.03	100	0	44	0	0	0
0	0	0	0	0	0	0	1	0	0	0	269.184	0	0	0	3.4	103.4	0	0	0	-0.085	0	0	43	0	0	0	0	0	0	2019-02-14T01:00:00.000	1970-01-01T16:52:20.849	157	0	0	0	43	0	0	0	0	0	1	0.03	100	0	44	0	0	0
0	0	0	0	0	0	0	1	0	0	0	269.184	0	0	0	3.4	103.4	0	0	0	-0.085	0	0	43	0	0	0	0	0	0	2019-02-14T01:00:00.000	1970-01-01T16:52:20.849	157	0	0	0	43	0	0	0	0	0	1	0.03	100	0	44	0	0	0
0	0	0	0	0	0	0	1	0	0	0	269.184	0	0	0	3.4	103.4	0	0	0	-0.085	0	0	43	0	0	0	0	0	0	2019-02-14T01:00:00.000	1970-01-01T16:52:20.849	157	0	0	0	43	0	0	0	0	0	1	0.03	100	0	44	0	0	0
0	0	0	0	0	0	0	1	0	0	0	269.184	0	0	0	3.4	103.4	0	0	0	-0.085	0	0	43	0	0	0	0	0	0	2019-02-14T01:00:00.000	1970-01-01T16:52:20.849	157	0	0	0	43	0	0	0	0	0	1	0.03	100	0	44	0	0	0
0	0	0	0	0	0	0	1	0	0	0	269.184	0	0	0	3.4	103.4	0	0	0	-0.08	0	0	43	0	0	0	0	0	0	2019-02-14T01:00:00.000	1970-01-01T16:52:20.969	157	0	0	0	43	0	0	0	0	0	1	0.045	100	0	44	0	0	0
0	0	0	0	0	0	0	1	0	0	0	269.184	0	0	0	3.4	103.4	0	0	0	-0.08	0	0	43	0	0	0	0	0	0	2019-02-14T01:00:00.000	1970-01-01T16:52:20.969	157	0	0	0	43	0	0	0	0	0	1	0.045	100	0	44	0	0	0
0	0	0	0	0	0	0	1	0	0	0	269.184	0	0	0	3.4	103.4	0	0	0	-0.08	0	0	43	0	0	0	0	0	0	2019-02-14T01:00:00.000	1970-01-01T16:52:20.969	157	0	0	0	43	0	0	0	0	0	1	0.045	100	0	44	0	0	0
0	0	0	0	0	0	0	1	0	0	0	269.184	0	0	0	3.4	103.4	0	0	0	-0.08	0	0	43	0	0	0	0	0	0	2019-02-14T01:00:00.000	1970-01-01T16:52:20.969	157	0	0	0	43	0	0	0	0	0	1	0.045	100	0	44	0	0	0
0	0	0	0	0	0	0	1	0	0	0	269.184	0	0	0	3.4	103.4	0	0	0	-0.09	0	0	43	0	0	0	0	0	0	2019-02-14T01:00:00.000	1970-01-01T16:52:21.079	157	0	0	0	43	0	0	0	0	0	1	0.045	100	0	44	0	0	0
0	0	0	0	0	0	0	1	0	0	0	269.184	0	0	0	3.4	103.4	0	0	0	-0.09	0	0	43	0	0	0	0	0	0	2019-02-14T01:00:00.000	1970-01-01T16:52:21.079	157	0	0	0	43	0	0	0	0	0	1	0.045	100	0	44	0	0	0
0	0	0	0	0	0	0	1	0	0	0	269.184	0	0	0	3.4	103.4	0	0	0	-0.09	0	0	43	0	0	0	0	0	0	2019-02-14T01:00:00.000	1970-01-01T16:52:21.079	157	0	0	0	43	0	0	0	0	0	1	0.045	100	0	44	0	0	0
0	0	0	0	0	0	0	1	0	0	0	269.184	0	0	0	3.4	103.4	0	0	0	-0.09	0	0	43	0	0	0	0	0	0	2019-02-14T01:00:00.000	1970-01-01T16:52:21.079	157	0	0	0	43	0	0	0	0	0	1	0.045	100	0	44	0	0	0
0	0	0	0	0	0	0	1	0	0	0	269.184	0	0	0	3.4	103.4	0	0	0	-0.09	0	0	43	0	0	0	0	0	0	2019-02-14T01:00:00.000	1970-01-01T16:52:21.079	157	0	0	0	43	0	0	0	0	0	1	0.045	100	0	44	0	0	0
0	0	0	0	0	0	0	1	0	0	0	269.184	0	0	0	3.4	103.4	0	0	0	-0.075	0	0	43	0	0	0	0	0	0	2019-02-14T01:00:00.000	1970-01-01T16:52:21.189	157	0	0	0	43	0	0	0	0	0	1	0.045	100	0	44	0	0	0
0	0	0	0	0	0	0	1	0	0	0	269.184	0	0	0	3.4	103.4	0	0	0	-0.075	0	0	43	0	0	0	0	0	0	2019-02-14T01:00:00.000	1970-01-01T16:52:21.189	157	0	0	0	43	0	0	0	0	0	1	0.045	100	0	44	0	0	0
0	0	0	0	0	0	0	1	0	0	0	269.184	0	0	0	3.4	103.4	0	0	0	-0.075	0	0	43	0	0	0	0	0	0	2019-02-14T01:00:00.000	1970-01-01T16:52:21.189	157	0	0	0	43	0	0	0	0	0	1	0.045	100	0	44	0	0	0
0	0	0	0	0	0	0	1	0	0	0	269.184	0	0	0	3.4	103.4	0	0	0	-0.075	0	0	43	0	0	0	0	0	0	2019-02-14T01:00:00.000	1970-01-01T16:52:21.189	157	0	0	0	43	0	0	0	0	0	1	0.045	100	0	44	0	0	0
0	0	0	0	0	0	0	1	0	0	0	269.184	0	0	0	3.4	103.4	0	0	0	-0.075	0	0	43	0	0	0	0	0	0	2019-02-14T01:00:00.000	1970-01-01T16:52:21.189	157	0	0	0	43	0	0	0	0	0	1	0.045	100	0	44	0	0	0
0	0	0	0	0	0	0	1	0	0	0	269.184	0	0	0	3.4	103.4	0	0	0	-0.085	0	0	43	0	0	0	0	0	0	2019-02-14T01:00:00.000	1970-01-01T16:52:21.309	157	0	0	0	43	0	0	0	0	0	1	0.037	100	0	44	0	0	0
0	0	0	0	0	0	0	1	0	0	0	269.184	0	0	0	3.4	103.4	0	0	0	-0.085	0	0	43	0	0	0	0	0	0	2019-02-14T01:00:00.000	1970-01-01T16:52:21.309	157	0	0	0	43	0	0	0	0	0	1	0.037	100	0	44	0	0	0
0	0	0	0	0	0	0	1	0	0	0	269.184	0	0	0	3.4	103.4	0	0	0	-0.085	0	0	43	0	0	0	0	0	0	2019-02-14T01:00:00.000	1970-01-01T16:52:21.309	157	0	0	0	43	0	0	0	0	0	1	0.037	100	0	44	0	0	0
0	0	0	0	0	0	0	1	0	0	0	269.184	0	0	0	3.4	103.4	0	0	0	-0.085	0	0	43	0	0	0	0	0	0	2019-02-14T01:00:00.000	1970-01-01T16:52:21.309	157	0	0	0	43	0	0	0	0	0	1	0.037	100	0	44	0	0	0
0	0	0	0	0	0	0	1	0	0	0	269.184	0	0	0	3.4	103.4	0	0	0	-0.085	0	0	43	0	0	0	0	0	0	2019-02-14T01:00:00.000	1970-01-01T16:52:21.309	157	0	0	0	43	0	0	0	0	0	1	0.037	100	0	44	0	0	0
0	0	0	0	0	0	0	1	0	0	0	269.184	0	0	0	3.4	103.4	0	0	0	-0.085	0	0	43	0	0	0	0	0	0	2019-02-14T01:00:00.000	1970-01-01T16:52:21.429	157	0	0	0	43	0	0	0	0	0	1	0.045	100	0	44	0	0	0
0	0	0	0	0	0	0	1	0	0	0	269.184	0	0	0	3.4	103.4	0	0	0	-0.085	0	0	43	0	0	0	0	0	0	2019-02-14T01:00:00.000	1970-01-01T16:52:21.429	157	0	0	0	43	0	0	0	0	0	1	0.045	100	0	44	0	0	0
0	0	0	0	0	0	0	1	0	0	0	269.184	0	0	0	3.4	103.4	0	0	0	-0.085	0	0	43	0	0	0	0	0	0	2019-02-14T01:00:00.000	1970-01-01T16:52:21.429	157	0	0	0	43	0	0	0	0	0	1	0.045	100	0	44	0	0	0
0	0	0	0	0	0	0	1	0	0	0	269.184	0	0	0	3.4	103.4	0	0	0	-0.085	0	0	43	0	0	0	0	0	0	2019-02-14T01:00:00.000	1970-01-01T16:52:21.429	157	0	0	0	43	0	0	0	0	0	1	0.045	100	0	44	0	0	0
0	0	0	0	0	0	0	1	0	0	0	269.184	0	0	0	3.4	103.4	0	0	0	-0.085	0	0	43	0	0	0	0	0	0	2019-02-14T01:00:00.000	1970-01-01T16:52:21.429	157	0	0	0	43	0	0	0	0	0	1	0.045	100	0	44	0	0	0
0	0	0	0	0	0	0	1	0	0	0	269.184	0	0	0	3.4	103.4	0	0	0	-0.085	0	0	43	0	0	0	0	0	0	2019-02-14T01:00:00.000	1970-01-01T16:52:21.549	157	0	0	0	43	0	0	0	0	0	1	0.037	100	0	44	0	0	0
0	0	0	0	0	0	0	1	0	0	0	269.184	0	0	0	3.4	103.4	0	0	0	-0.085	0	0	43	0	0	0	0	0	0	2019-02-14T01:00:00.000	1970-01-01T16:52:21.549	157	0	0	0	43	0	0	0	0	0	1	0.037	100	0	44	0	0	0
0	0	0	0	0	0	0	1	0	0	0	269.184	0	0	0	3.4	103.4	0	0	0	-0.085	0	0	43	0	0	0	0	0	0	2019-02-14T01:00:00.000	1970-01-01T16:52:21.549	157	0	0	0	43	0	0	0	0	0	1	0.037	100	0	44	0	0	0
0	0	0	0	0	0	0	1	0	0	0	269.184	0	0	0	3.4	103.4	0	0	0	-0.085	0	0	43	0	0	0	0	0	0	2019-02-14T01:00:00.000	1970-01-01T16:52:21.549	157	0	0	0	43	0	0	0	0	0	1	0.037	100	0	44	0	0	0
0	0	0	0	0	0	0	1	0	0	0	269.184	0	0	0	3.4	103.4	0	0	0	-0.085	0	0	43	0	0	0	0	0	0	2019-02-14T01:00:00.000	1970-01-01T16:52:21.549	157	0	0	0	43	0	0	0	0	0	1	0.037	100	0	44	0	0	0
0	0	0	0	0	0	0	1	0	0	0	269.184	0	0	0	3.4	103.4	0	0	0	-0.08	0	0	43	0	0	0	0	0	0	2019-02-14T01:00:00.000	1970-01-01T16:52:21.669	157	0	0	0	43	0	0	0	0	0	1	0.052	100	0	44	0	0	0
0	0	0	0	0	0	0	1	0	0	0	269.184	0	0	0	3.4	103.4	0	0	0	-0.08	0	0	43	0	0	0	0	0	0	2019-02-14T01:00:00.000	1970-01-01T16:52:21.669	157	0	0	0	43	0	0	0	0	0	1	0.052	100	0	44	0	0	0
0	0	0	0	0	0	0	1	0	0	0	269.184	0	0	0	3.4	103.4	0	0	0	-0.08	0	0	43	0	0	0	0	0	0	2019-02-14T01:00:00.000	1970-01-01T16:52:21.669	157	0	0	0	43	0	0	0	0	0	1	0.052	100	0	44	0	0	0
0	0	0	0	0	0	0	1	0	0	0	269.184	0	0	0	3.4	103.4	0	0	0	-0.08	0	0	43	0	0	0	0	0	0	2019-02-14T01:00:00.000	1970-01-01T16:52:21.669	157	0	0	0	43	0	0	0	0	0	1	0.052	100	0	44	0	0	0
0	0	0	0	0	0	0	1	0	0	0	269.184	0	0	0	3.4	103.4	0	0	0	-0.08	0	0	43	0	0	0	0	0	0	2019-02-14T01:00:00.000	1970-01-01T16:52:21.669	157	0	0	0	43	0	0	0	0	0	1	0.052	100	0	44	0	0	0
0	0	0	0	0	0	0	1	0	0	0	269.184	0	0	0	3.4	103.4	0	0	0	-0.075	0	0	43	0	0	0	0	0	0	2019-02-14T01:00:00.000	1970-01-01T16:52:21.779	157	0	0	0	43	0	0	0	0	0	1	0.045	100	0	44	0	0	0
0	0	0	0	0	0	0	1	0	0	0	269.184	0	0	0	3.4	103.4	0	0	0	-0.075	0	0	43	0	0	0	0	0	0	2019-02-14T01:00:00.000	1970-01-01T16:52:21.779	157	0	0	0	43	0	0	0	0	0	1	0.045	100	0	44	0	0	0
0	0	0	0	0	0	0	1	0	0	0	269.184	0	0	0	3.4	103.4	0	0	0	-0.075	0	0	43	0	0	0	0	0	0	2019-02-14T01:00:00.000	1970-01-01T16:52:21.779	157	0	0	0	43	0	0	0	0	0	1	0.045	100	0	44	0	0	0
0	0	0	0	0	0	0	1	0	0	0	269.184	0	0	0	3.4	103.4	0	0	0	-0.075	0	0	43	0	0	0	0	0	0	2019-02-14T01:00:00.000	1970-01-01T16:52:21.779	157	0	0	0	43	0	0	0	0	0	1	0.045	100	0	44	0	0	0
0	0	0	0	0	0	0	1	0	0	0	269.184	0	0	0	3.4	103.4	0	0	0	-0.075	0	0	43	0	0	0	0	0	0	2019-02-14T01:00:00.000	1970-01-01T16:52:21.779	157	0	0	0	43	0	0	0	0	0	1	0.045	100	0	44	0	0	0
0	0	0	0	0	0	0	1	0	0	0	269.184	0	0	0	3.4	103.4	0	0	0	-0.09	0	0	43	0	0	0	0	0	0	2019-02-14T01:00:00.000	1970-01-01T16:52:21.899	157	0	0	0	43	0	0	0	0	0	1	0.045	100	0	44	0	0	0
0	0	0	0	0	0	0	1	0	0	0	269.184	0	0	0	3.4	103.4	0	0	0	-0.09	0	0	43	0	0	0	0	0	0	2019-02-14T01:00:00.000	1970-01-01T16:52:21.899	157	0	0	0	43	0	0	0	0	0	1	0.045	100	0	44	0	0	0
0	0	0	0	0	0	0	1	0	0	0	269.184	0	0	0	3.4	103.4	0	0	0	-0.09	0	0	43	0	0	0	0	0	0	2019-02-14T01:00:00.000	1970-01-01T16:52:21.899	157	0	0	0	43	0	0	0	0	0	1	0.045	100	0	44	0	0	0
0	0	0	0	0	0	0	1	0	0	0	269.184	0	0	0	3.4	103.4	0	0	0	-0.09	0	0	43	0	0	0	0	0	0	2019-02-14T01:00:00.000	1970-01-01T16:52:21.899	157	0	0	0	43	0	0	0	0	0	1	0.045	100	0	44	0	0	0
0	0	0	0	0	0	0	1	0	0	0	269.184	0	0	0	3.4	103.4	0	0	0	-0.09	0	0	43	0	0	0	0	0	0	2019-02-14T01:00:00.000	1970-01-01T16:52:21.899	157	0	0	0	43	0	0	0	0	0	1	0.045	100	0	44	0	0	0
0	0	0	0	0	0	0	1	0	0	0	269.184	0	0	0	3.4	103.4	0	0	0	-0.08	0	0	43	0	0	0	0	0	0	2019-02-14T01:00:00.000	1970-01-01T16:52:22.019	157	0	0	0	43	0	0	0	0	0	1	0.045	100	0	44	0	0	0
0	0	0	0	0	0	0	1	0	0	0	269.184	0	0	0	3.4	103.4	0	0	0	-0.08	0	0	43	0	0	0	0	0	0	2019-02-14T01:00:00.000	1970-01-01T16:52:22.019	157	0	0	0	43	0	0	0	0	0	1	0.045	100	0	44	0	0	0
0	0	0	0	0	0	0	1	0	0	0	269.184	0	0	0	3.4	103.4	0	0	0	-0.08	0	0	43	0	0	0	0	0	0	2019-02-14T01:00:00.000	1970-01-01T16:52:22.279	157	0	0	0	43	0	0	0	0	0	1	0.037	100	0	44	0	0	0
0	0	0	0	0	0	0	1	0	0	0	269.184	0	0	0	3.4	103.4	0	0	0	-0.08	0	0	43	0	0	0	0	0	0	2019-02-14T01:00:00.000	1970-01-01T16:52:22.279	157	0	0	0	43	0	0	0	0	0	1	0.037	100	0	44	0	0	0
0	0	0	0	0	0	0	1	0	0	0	269.184	0	0	0	3.4	103.4	0	0	0	-0.08	0	0	43	0	0	0	0	0	0	2019-02-14T01:00:00.000	1970-01-01T16:52:22.279	157	0	0	0	43	0	0	0	0	0	1	0.037	100	0	44	0	0	0
0	0	0	0	0	0	0	1	0	0	0	269.184	0	0	0	3.4	103.4	0	0	0	-0.08	0	0	43	0	0	0	0	0	0	2019-02-14T01:00:00.000	1970-01-01T16:52:22.279	157	0	0	0	43	0	0	0	0	0	1	0.037	100	0	44	0	0	0
0	0	0	0	0	0	0	1	0	0	0	269.184	0	0	0	3.4	103.4	0	0	0	-0.08	0	0	43	0	0	0	0	0	0	2019-02-14T01:00:00.000	1970-01-01T16:52:22.279	157	0	0	0	43	0	0	0	0	0	1	0.037	100	0	44	0	0	0
0	0	0	0	0	0	0	1	0	0	0	269.184	0	0	0	3.4	103.4	0	0	0	-0.085	0	0	43	0	0	0	0	0	0	2019-02-14T01:00:00.000	1970-01-01T16:52:22.389	157	0	0	0	43	0	0	0	0	0	1	0.052	100	0	44	0	0	0
0	0	0	0	0	0	0	1	0	0	0	269.184	0	0	0	3.4	103.4	0	0	0	-0.085	0	0	43	0	0	0	0	0	0	2019-02-14T01:00:00.000	1970-01-01T16:52:22.389	157	0	0	0	43	0	0	0	0	0	1	0.052	100	0	44	0	0	0
0	0	0	0	0	0	0	1	0	0	0	269.184	0	0	0	3.4	103.4	0	0	0	-0.085	0	0	43	0	0	0	0	0	0	2019-02-14T01:00:00.000	1970-01-01T16:52:22.389	157	0	0	0	43	0	0	0	0	0	1	0.052	100	0	44	0	0	0
0	0	0	0	0	0	0	1	0	0	0	269.184	0	0	0	3.4	103.4	0	0	0	-0.085	0	0	43	0	0	0	0	0	0	2019-02-14T01:00:00.000	1970-01-01T16:52:22.389	157	0	0	0	43	0	0	0	0	0	1	0.052	100	0	44	0	0	0
0	0	0	0	0	0	0	1	0	0	0	269.184	0	0	0	3.4	103.4	0	0	0	-0.085	0	0	43	0	0	0	0	0	0	2019-02-14T01:00:00.000	1970-01-01T16:52:22.389	157	0	0	0	43	0	0	0	0	0	1	0.052	100	0	44	0	0	0
0	0	0	0	0	0	0	1	0	0	0	269.184	0	0	0	3.4	103.4	0	0	0	-0.075	0	0	43	0	0	0	0	0	0	2019-02-14T01:00:00.000	1970-01-01T16:52:22.509	157	0	0	0	43	0	0	0	0	0	1	0.045	100	0	44	0	0	0
0	0	0	0	0	0	0	1	0	0	0	269.184	0	0	0	3.4	103.4	0	0	0	-0.075	0	0	43	0	0	0	0	0	0	2019-02-14T01:00:00.000	1970-01-01T16:52:22.509	157	0	0	0	43	0	0	0	0	0	1	0.045	100	0	44	0	0	0
0	0	0	0	0	0	0	1	0	0	0	269.184	0	0	0	3.4	103.4	0	0	0	-0.075	0	0	43	0	0	0	0	0	0	2019-02-14T01:00:00.000	1970-01-01T16:52:22.509	157	0	0	0	43	0	0	0	0	0	1	0.045	100	0	44	0	0	0
0	0	0	0	0	0	0	1	0	0	0	269.184	0	0	0	3.4	103.4	0	0	0	-0.075	0	0	43	0	0	0	0	0	0	2019-02-14T01:00:00.000	1970-01-01T16:52:22.509	157	0	0	0	43	0	0	0	0	0	1	0.045	100	0	44	0	0	0
0	0	0	0	0	0	0	1	0	0	0	269.184	0	0	0	3.4	103.4	0	0	0	-0.075	0	0	43	0	0	0	0	0	0	2019-02-14T01:00:00.000	1970-01-01T16:52:22.509	157	0	0	0	43	0	0	0	0	0	1	0.045	100	0	44	0	0	0
0	0	0	0	0	0	0	1	0	0	0	269.184	0	0	0	3.4	103.4	0	0	0	-0.095	0	0	43	0	0	0	0	0	0	2019-02-14T01:00:00.000	1970-01-01T16:52:22.629	157	0	0	0	43	0	0	0	0	0	1	0.03	100	0	44	0	0	0
0	0	0	0	0	0	0	1	0	0	0	269.184	0	0	0	3.4	103.4	0	0	0	-0.095	0	0	43	0	0	0	0	0	0	2019-02-14T01:00:00.000	1970-01-01T16:52:22.629	157	0	0	0	43	0	0	0	0	0	1	0.03	100	0	44	0	0	0
0	0	0	0	0	0	0	1	0	0	0	269.184	0	0	0	3.4	103.4	0	0	0	-0.095	0	0	43	0	0	0	0	0	0	2019-02-14T01:00:00.000	1970-01-01T16:52:22.629	157	0	0	0	43	0	0	0	0	0	1	0.03	100	0	44	0	0	0
0	0	0	0	0	0	0	1	0	0	0	269.184	0	0	0	3.4	103.4	0	0	0	-0.095	0	0	43	0	0	0	0	0	0	2019-02-14T01:00:00.000	1970-01-01T16:52:22.629	157	0	0	0	43	0	0	0	0	0	1	0.03	100	0	44	0	0	0
0	0	0	0	0	0	0	1	0	0	0	269.184	0	0	0	3.4	103.4	0	0	0	-0.095	0	0	43	0	0	0	0	0	0	2019-02-14T01:00:00.000	1970-01-01T16:52:22.629	157	0	0	0	43	0	0	0	0	0	1	0.03	100	0	44	0	0	0
0	0	0	0	0	0	0	1	0	0	0	269.184	0	0	0	3.4	103.4	0	0	0	-0.09	0	0	43	0	0	0	0	0	0	2019-02-14T01:00:00.000	1970-01-01T16:52:22.749	157	0	0	0	43	0	0	0	0	0	1	0.052	100	0	44	0	0	0
0	0	0	0	0	0	0	1	0	0	0	269.184	0	0	0	3.4	103.4	0	0	0	-0.09	0	0	43	0	0	0	0	0	0	2019-02-14T01:00:00.000	1970-01-01T16:52:22.749	157	0	0	0	43	0	0	0	0	0	1	0.052	100	0	44	0	0	0
0	0	0	0	0	0	0	1	0	0	0	269.184	0	0	0	3.4	103.4	0	0	0	-0.09	0	0	43	0	0	0	0	0	0	2019-02-14T01:00:00.000	1970-01-01T16:52:22.749	157	0	0	0	43	0	0	0	0	0	1	0.052	100	0	44	0	0	0
0	0	0	0	0	0	0	1	0	0	0	269.184	0	0	0	3.4	103.4	0	0	0	-0.09	0	0	43	0	0	0	0	0	0	2019-02-14T01:00:00.000	1970-01-01T16:52:22.749	157	0	0	0	43	0	0	0	0	0	1	0.052	100	0	44	0	0	0
0	0	0	0	0	0	0	1	0	0	0	269.184	0	0	0	3.4	103.4	0	0	0	-0.09	0	0	43	0	0	0	0	0	0	2019-02-14T01:00:00.000	1970-01-01T16:52:22.749	157	0	0	0	43	0	0	0	0	0	1	0.052	100	0	44	0	0	0
0	0	0	0	0	0	0	1	0	0	0	269.184	0	0	0	3.4	103.4	0	0	0	-0.085	0	0	43	0	0	0	0	0	0	2019-02-14T01:00:00.000	1970-01-01T16:52:22.859	157	0	0	0	43	0	0	0	0	0	1	0.037	100	0	44	0	0	0
0	0	0	0	0	0	0	1	0	0	0	269.184	0	0	0	3.4	103.4	0	0	0	-0.085	0	0	43	0	0	0	0	0	0	2019-02-14T01:00:00.000	1970-01-01T16:52:22.859	157	0	0	0	43	0	0	0	0	0	1	0.037	100	0	44	0	0	0
0	0	0	0	0	0	0	1	0	0	0	269.184	0	0	0	3.4	103.4	0	0	0	-0.085	0	0	43	0	0	0	0	0	0	2019-02-14T01:00:00.000	1970-01-01T16:52:22.859	157	0	0	0	43	0	0	0	0	0	1	0.037	100	0	44	0	0	0
0	0	0	0	0	0	0	1	0	0	0	269.184	0	0	0	3.4	103.4	0	0	0	-0.085	0	0	43	0	0	0	0	0	0	2019-02-14T01:00:00.000	1970-01-01T16:52:22.859	157	0	0	0	43	0	0	0	0	0	1	0.037	100	0	44	0	0	0
0	0	0	0	0	0	0	1	0	0	0	269.184	0	0	0	3.4	103.4	0	0	0	-0.085	0	0	43	0	0	0	0	0	0	2019-02-14T01:00:00.000	1970-01-01T16:52:22.859	157	0	0	0	43	0	0	0	0	0	1	0.037	100	0	44	0	0	0
0	0	0	0	0	0	0	1	0	0	0	269.184	0	0	0	3.4	103.4	0	0	0	-0.095	0	0	43	0	0	0	0	0	0	2019-02-14T01:00:00.000	1970-01-01T16:52:22.979	157	0	0	0	43	0	0	0	0	0	1	0.03	100	0	44	0	0	0
0	0	0	0	0	0	0	1	0	0	0	269.184	0	0	0	3.4	103.4	0	0	0	-0.095	0	0	43	0	0	0	0	0	0	2019-02-14T01:00:00.000	1970-01-01T16:52:22.979	157	0	0	0	43	0	0	0	0	0	1	0.03	100	0	44	0	0	0
0	0	0	0	0	0	0	1	0	0	0	269.184	0	0	0	3.4	103.4	0	0	0	-0.095	0	0	43	0	0	0	0	0	0	2019-02-14T01:00:00.000	1970-01-01T16:52:22.979	157	0	0	0	43	0	0	0	0	0	1	0.03	100	0	44	0	0	0
0	0	0	0	0	0	0	1	0	0	0	269.184	0	0	0	3.4	103.4	0	0	0	-0.095	0	0	43	0	0	0	0	0	0	2019-02-14T01:00:00.000	1970-01-01T16:52:22.979	157	0	0	0	43	0	0	0	0	0	1	0.03	100	0	44	0	0	0
0	0	0	0	0	0	0	1	0	0	0	269.184	0	0	0	3.4	103.4	0	0	0	-0.095	0	0	43	0	0	0	0	0	0	2019-02-14T01:00:00.000	1970-01-01T16:52:22.979	157	0	0	0	43	0	0	0	0	0	1	0.03	100	0	44	0	0	0
0	0	0	0	0	0	0	1	0	0	0	269.184	0	0	0	3.4	103.4	0	0	0	-0.09	0	0	43	0	0	0	0	0	0	2019-02-14T01:00:00.000	1970-01-01T16:52:23.099	157	0	0	0	43	0	0	0	0	0	1	0.052	100	0	44	0	0	0
0	0	0	0	0	0	0	1	0	0	0	269.184	0	0	0	3.4	103.4	0	0	0	-0.09	0	0	43	0	0	0	0	0	0	2019-02-14T01:00:00.000	1970-01-01T16:52:23.099	157	0	0	0	43	0	0	0	0	0	1	0.052	100	0	44	0	0	0
0	0	0	0	0	0	0	1	0	0	0	269.184	0	0	0	3.4	103.4	0	0	0	-0.09	0	0	43	0	0	0	0	0	0	2019-02-14T01:00:00.000	1970-01-01T16:52:23.099	157	0	0	0	43	0	0	0	0	0	1	0.052	100	0	44	0	0	0
0	0	0	0	0	0	0	1	0	0	0	269.184	0	0	0	3.4	103.4	0	0	0	-0.09	0	0	43	0	0	0	0	0	0	2019-02-14T01:00:00.000	1970-01-01T16:52:23.099	157	0	0	0	43	0	0	0	0	0	1	0.052	100	0	44	0	0	0
0	0	0	0	0	0	0	1	0	0	0	269.184	0	0	0	3.4	103.4	0	0	0	-0.09	0	0	43	0	0	0	0	0	0	2019-02-14T01:00:00.000	1970-01-01T16:52:23.099	157	0	0	0	43	0	0	0	0	0	1	0.052	100	0	44	0	0	0
0	0	0	0	0	0	0	1	0	0	0	269.184	0	0	0	3.4	103.4	0	0	0	-0.08	0	0	43	0	0	0	0	0	0	2019-02-14T01:00:00.000	1970-01-01T16:52:23.219	157	0	0	0	43	0	0	0	0	0	1	0.037	100	0	44	0	0	0
0	0	0	0	0	0	0	1	0	0	0	269.184	0	0	0	3.4	103.4	0	0	0	-0.08	0	0	43	0	0	0	0	0	0	2019-02-14T01:00:00.000	1970-01-01T16:52:23.219	157	0	0	0	43	0	0	0	0	0	1	0.037	100	0	44	0	0	0
0	0	0	0	0	0	0	1	0	0	0	269.184	0	0	0	3.4	103.4	0	0	0	-0.08	0	0	43	0	0	0	0	0	0	2019-02-14T01:00:00.000	1970-01-01T16:52:23.219	157	0	0	0	43	0	0	0	0	0	1	0.037	100	0	44	0	0	0
0	0	0	0	0	0	0	1	0	0	0	269.184	0	0	0	3.4	103.4	0	0	0	-0.08	0	0	43	0	0	0	0	0	0	2019-02-14T01:00:00.000	1970-01-01T16:52:23.219	157	0	0	0	43	0	0	0	0	0	1	0.037	100	0	44	0	0	0
0	0	0	0	0	0	0	1	0	0	0	269.184	0	0	0	3.4	103.4	0	0	0	-0.08	0	0	43	0	0	0	0	0	0	2019-02-14T01:00:00.000	1970-01-01T16:52:23.219	157	0	0	0	43	0	0	0	0	0	1	0.037	100	0	44	0	0	0
0	0	0	0	0	0	0	1	0	0	0	269.184	0	0	0	3.4	103.4	0	0	0	-0.09	0	0	43	0	0	0	0	0	0	2019-02-14T01:00:00.000	1970-01-01T16:52:23.339	157	0	0	0	43	0	0	0	0	0	1	0.037	100	0	44	0	0	0
0	0	0	0	0	0	0	1	0	0	0	269.184	0	0	0	3.4	103.4	0	0	0	-0.09	0	0	43	0	0	0	0	0	0	2019-02-14T01:00:00.000	1970-01-01T16:52:23.339	157	0	0	0	43	0	0	0	0	0	1	0.037	100	0	44	0	0	0
0	0	0	0	0	0	0	1	0	0	0	269.184	0	0	0	3.4	103.4	0	0	0	-0.09	0	0	43	0	0	0	0	0	0	2019-02-14T01:00:00.000	1970-01-01T16:52:23.339	157	0	0	0	43	0	0	0	0	0	1	0.037	100	0	44	0	0	0
0	0	0	0	0	0	0	1	0	0	0	269.184	0	0	0	3.4	103.4	0	0	0	-0.085	0	0	43	0	0	0	0	0	0	2019-02-14T01:00:00.000	1970-01-01T16:52:23.619	157	0	0	0	43	0	0	0	0	0	1	0.037	100	0	44	0	0	0
0	0	0	0	0	0	0	1	0	0	0	269.184	0	0	0	3.4	103.4	0	0	0	-0.085	0	0	43	0	0	0	0	0	0	2019-02-14T01:00:00.000	1970-01-01T16:52:23.619	157	0	0	0	43	0	0	0	0	0	1	0.037	100	0	44	0	0	0
0	0	0	0	0	0	0	1	0	0	0	269.184	0	0	0	3.4	103.4	0	0	0	-0.085	0	0	43	0	0	0	0	0	0	2019-02-14T01:00:00.000	1970-01-01T16:52:23.619	157	0	0	0	43	0	0	0	0	0	1	0.037	100	0	44	0	0	0
0	0	0	0	0	0	0	1	0	0	0	269.184	0	0	0	3.4	103.4	0	0	0	-0.085	0	0	43	0	0	0	0	0	0	2019-02-14T01:00:00.000	1970-01-01T16:52:23.619	157	0	0	0	43	0	0	0	0	0	1	0.037	100	0	44	0	0	0
0	0	0	0	0	0	0	1	0	0	0	269.184	0	0	0	3.4	103.4	0	0	0	-0.085	0	0	43	0	0	0	0	0	0	2019-02-14T01:00:00.000	1970-01-01T16:52:23.619	157	0	0	0	43	0	0	0	0	0	1	0.037	100	0	44	0	0	0
0	0	0	0	0	0	0	1	0	0	0	269.184	0	0	0	3.4	103.4	0	0	0	-0.085	0	0	43	0	0	0	0	0	0	2019-02-14T01:00:00.000	1970-01-01T16:52:23.739	157	0	0	0	43	0	0	0	0	0	1	0.045	100	0	44	0	0	0
0	0	0	0	0	0	0	1	0	0	0	269.184	0	0	0	3.4	103.4	0	0	0	-0.085	0	0	43	0	0	0	0	0	0	2019-02-14T01:00:00.000	1970-01-01T16:52:23.739	157	0	0	0	43	0	0	0	0	0	1	0.045	100	0	44	0	0	0
0	0	0	0	0	0	0	1	0	0	0	269.184	0	0	0	3.4	103.4	0	0	0	-0.085	0	0	43	0	0	0	0	0	0	2019-02-14T01:00:00.000	1970-01-01T16:52:23.739	157	0	0	0	43	0	0	0	0	0	1	0.045	100	0	44	0	0	0
0	0	0	0	0	0	0	1	0	0	0	269.184	0	0	0	3.4	103.4	0	0	0	-0.085	0	0	43	0	0	0	0	0	0	2019-02-14T01:00:00.000	1970-01-01T16:52:23.739	157	0	0	0	43	0	0	0	0	0	1	0.045	100	0	44	0	0	0
0	0	0	0	0	0	0	1	0	0	0	269.184	0	0	0	3.4	103.4	0	0	0	-0.085	0	0	43	0	0	0	0	0	0	2019-02-14T01:00:00.000	1970-01-01T16:52:23.739	157	0	0	0	43	0	0	0	0	0	1	0.045	100	0	44	0	0	0
0	0	0	0	0	0	0	1	0	0	0	269.184	0	0	0	3.4	103.4	0	0	0	-0.08	0	0	43	0	0	0	0	0	0	2019-02-14T01:00:00.000	1970-01-01T16:52:23.849	157	0	0	0	43	0	0	0	0	0	1	0.037	100	0	44	0	0	0
0	0	0	0	0	0	0	1	0	0	0	269.184	0	0	0	3.4	103.4	0	0	0	-0.08	0	0	43	0	0	0	0	0	0	2019-02-14T01:00:00.000	1970-01-01T16:52:23.849	157	0	0	0	43	0	0	0	0	0	1	0.037	100	0	44	0	0	0
0	0	0	0	0	0	0	1	0	0	0	269.184	0	0	0	3.4	103.4	0	0	0	-0.08	0	0	43	0	0	0	0	0	0	2019-02-14T01:00:00.000	1970-01-01T16:52:23.849	157	0	0	0	43	0	0	0	0	0	1	0.037	100	0	44	0	0	0
0	0	0	0	0	0	0	1	0	0	0	269.184	0	0	0	3.4	103.4	0	0	0	-0.08	0	0	43	0	0	0	0	0	0	2019-02-14T01:00:00.000	1970-01-01T16:52:23.849	157	0	0	0	43	0	0	0	0	0	1	0.037	100	0	44	0	0	0
0	0	0	0	0	0	0	1	0	0	0	269.184	0	0	0	3.4	103.4	0	0	0	-0.08	0	0	43	0	0	0	0	0	0	2019-02-14T01:00:00.000	1970-01-01T16:52:23.849	157	0	0	0	43	0	0	0	0	0	1	0.037	100	0	44	0	0	0
0	0	0	0	0	0	0	1	0	0	0	269.184	0	0	0	3.4	103.4	0	0	0	-0.095	0	0	43	0	0	0	0	0	0	2019-02-14T01:00:00.000	1970-01-01T16:52:23.969	157	0	0	0	43	0	0	0	0	0	1	0.045	100	0	44	0	0	0
0	0	0	0	0	0	0	1	0	0	0	269.184	0	0	0	3.4	103.4	0	0	0	-0.095	0	0	43	0	0	0	0	0	0	2019-02-14T01:00:00.000	1970-01-01T16:52:23.969	157	0	0	0	43	0	0	0	0	0	1	0.045	100	0	44	0	0	0
0	0	0	0	0	0	0	1	0	0	0	269.184	0	0	0	3.4	103.4	0	0	0	-0.095	0	0	43	0	0	0	0	0	0	2019-02-14T01:00:00.000	1970-01-01T16:52:23.969	157	0	0	0	43	0	0	0	0	0	1	0.045	100	0	44	0	0	0
0	0	0	0	0	0	0	1	0	0	0	269.184	0	0	0	3.4	103.4	0	0	0	-0.095	0	0	43	0	0	0	0	0	0	2019-02-14T01:00:00.000	1970-01-01T16:52:23.969	157	0	0	0	43	0	0	0	0	0	1	0.045	100	0	44	0	0	0
0	0	0	0	0	0	0	1	0	0	0	269.184	0	0	0	3.4	103.4	0	0	0	-0.095	0	0	43	0	0	0	0	0	0	2019-02-14T01:00:00.000	1970-01-01T16:52:23.969	157	0	0	0	43	0	0	0	0	0	1	0.045	100	0	44	0	0	0
0	0	0	0	0	0	0	1	0	0	0	269.184	0	0	0	3.4	103.4	0	0	0	-0.095	0	0	43	0	0	0	0	0	0	2019-02-14T01:00:00.000	1970-01-01T16:52:24.089	157	0	0	0	43	0	0	0	0	0	1	0.045	100	0	44	0	0	0
0	0	0	0	0	0	0	1	0	0	0	269.184	0	0	0	3.4	103.4	0	0	0	-0.095	0	0	43	0	0	0	0	0	0	2019-02-14T01:00:00.000	1970-01-01T16:52:24.089	157	0	0	0	43	0	0	0	0	0	1	0.045	100	0	44	0	0	0
0	0	0	0	0	0	0	1	0	0	0	269.184	0	0	0	3.4	103.4	0	0	0	-0.095	0	0	43	0	0	0	0	0	0	2019-02-14T01:00:00.000	1970-01-01T16:52:24.089	157	0	0	0	43	0	0	0	0	0	1	0.045	100	0	44	0	0	0
0	0	0	0	0	0	0	1	0	0	0	269.184	0	0	0	3.4	103.4	0	0	0	-0.095	0	0	43	0	0	0	0	0	0	2019-02-14T01:00:00.000	1970-01-01T16:52:24.089	157	0	0	0	43	0	0	0	0	0	1	0.045	100	0	44	0	0	0
0	0	0	0	0	0	0	1	0	0	0	269.184	0	0	0	3.4	103.4	0	0	0	-0.095	0	0	43	0	0	0	0	0	0	2019-02-14T01:00:00.000	1970-01-01T16:52:24.089	157	0	0	0	43	0	0	0	0	0	1	0.045	100	0	44	0	0	0
0	0	0	0	0	0	0	1	0	0	0	269.184	0	0	0	3.4	103.4	0	0	0	-0.085	0	0	43	0	0	0	0	0	0	2019-02-14T01:00:00.000	1970-01-01T16:52:24.199	157	0	0	0	43	0	0	0	0	0	1	0.045	100	0	44	0	0	0
0	0	0	0	0	0	0	1	0	0	0	269.184	0	0	0	3.4	103.4	0	0	0	-0.085	0	0	43	0	0	0	0	0	0	2019-02-14T01:00:00.000	1970-01-01T16:52:24.199	157	0	0	0	43	0	0	0	0	0	1	0.045	100	0	44	0	0	0
0	0	0	0	0	0	0	1	0	0	0	269.184	0	0	0	3.4	103.4	0	0	0	-0.085	0	0	43	0	0	0	0	0	0	2019-02-14T01:00:00.000	1970-01-01T16:52:24.199	157	0	0	0	43	0	0	0	0	0	1	0.045	100	0	44	0	0	0
0	0	0	0	0	0	0	1	0	0	0	269.184	0	0	0	3.4	103.4	0	0	0	-0.085	0	0	43	0	0	0	0	0	0	2019-02-14T01:00:00.000	1970-01-01T16:52:24.199	157	0	0	0	43	0	0	0	0	0	1	0.045	100	0	44	0	0	0
0	0	0	0	0	0	0	1	0	0	0	269.184	0	0	0	3.4	103.4	0	0	0	-0.085	0	0	43	0	0	0	0	0	0	2019-02-14T01:00:00.000	1970-01-01T16:52:24.199	157	0	0	0	43	0	0	0	0	0	1	0.045	100	0	44	0	0	0
0	0	0	0	0	0	0	1	0	0	0	269.184	0	0	0	3.4	103.4	0	0	0	-0.09	0	0	43	0	0	0	0	0	0	2019-02-14T01:00:00.000	1970-01-01T16:52:24.319	157	0	0	0	43	0	0	0	0	0	1	0.037	100	0	44	0	0	0
0	0	0	0	0	0	0	1	0	0	0	269.184	0	0	0	3.4	103.4	0	0	0	-0.09	0	0	43	0	0	0	0	0	0	2019-02-14T01:00:00.000	1970-01-01T16:52:24.319	157	0	0	0	43	0	0	0	0	0	1	0.037	100	0	44	0	0	0
0	0	0	0	0	0	0	1	0	0	0	269.184	0	0	0	3.4	103.4	0	0	0	-0.09	0	0	43	0	0	0	0	0	0	2019-02-14T01:00:00.000	1970-01-01T16:52:24.319	157	0	0	0	43	0	0	0	0	0	1	0.037	100	0	44	0	0	0
0	0	0	0	0	0	0	1	0	0	0	269.184	0	0	0	3.4	103.4	0	0	0	-0.09	0	0	43	0	0	0	0	0	0	2019-02-14T01:00:00.000	1970-01-01T16:52:24.319	157	0	0	0	43	0	0	0	0	0	1	0.037	100	0	44	0	0	0
0	0	0	0	0	0	0	1	0	0	0	269.184	0	0	0	3.4	103.4	0	0	0	-0.09	0	0	43	0	0	0	0	0	0	2019-02-14T01:00:00.000	1970-01-01T16:52:24.319	157	0	0	0	43	0	0	0	0	0	1	0.037	100	0	44	0	0	0
0	0	0	0	0	0	0	1	0	0	0	269.184	0	0	0	3.4	103.4	0	0	0	-0.095	0	0	43	0	0	0	0	0	0	2019-02-14T01:00:00.000	1970-01-01T16:52:24.439	157	0	0	0	43	0	0	0	0	0	1	0.037	100	0	44	0	0	0
0	0	0	0	0	0	0	1	0	0	0	269.184	0	0	0	3.4	103.4	0	0	0	-0.095	0	0	43	0	0	0	0	0	0	2019-02-14T01:00:00.000	1970-01-01T16:52:24.439	157	0	0	0	43	0	0	0	0	0	1	0.037	100	0	44	0	0	0
0	0	0	0	0	0	0	1	0	0	0	269.184	0	0	0	3.4	103.4	0	0	0	-0.095	0	0	43	0	0	0	0	0	0	2019-02-14T01:00:00.000	1970-01-01T16:52:24.439	157	0	0	0	43	0	0	0	0	0	1	0.037	100	0	44	0	0	0
0	0	0	0	0	0	0	1	0	0	0	269.184	0	0	0	3.4	103.4	0	0	0	-0.085	0	0	43	0	0	0	0	0	0	2019-02-14T01:00:00.000	1970-01-01T16:52:24.719	157	0	0	0	43	0	0	0	0	0	1	0.045	100	0	44	0	0	0
0	0	0	0	0	0	0	1	0	0	0	269.184	0	0	0	3.4	103.4	0	0	0	-0.085	0	0	43	0	0	0	0	0	0	2019-02-14T01:00:00.000	1970-01-01T16:52:24.719	157	0	0	0	43	0	0	0	0	0	1	0.045	100	0	44	0	0	0
0	0	0	0	0	0	0	1	0	0	0	269.184	0	0	0	3.4	103.4	0	0	0	-0.085	0	0	43	0	0	0	0	0	0	2019-02-14T01:00:00.000	1970-01-01T16:52:24.719	157	0	0	0	43	0	0	0	0	0	1	0.045	100	0	44	0	0	0
0	0	0	0	0	0	0	1	0	0	0	269.184	0	0	0	3.4	103.4	0	0	0	-0.085	0	0	43	0	0	0	0	0	0	2019-02-14T01:00:00.000	1970-01-01T16:52:24.719	157	0	0	0	43	0	0	0	0	0	1	0.045	100	0	44	0	0	0
0	0	0	0	0	0	0	1	0	0	0	269.184	0	0	0	3.4	103.4	0	0	0	-0.085	0	0	43	0	0	0	0	0	0	2019-02-14T01:00:00.000	1970-01-01T16:52:24.719	157	0	0	0	43	0	0	0	0	0	1	0.045	100	0	44	0	0	0
0	0	0	0	0	0	0	1	0	0	0	269.184	0	0	0	3.4	103.4	0	0	0	-0.09	0	0	43	0	0	0	0	0	0	2019-02-14T01:00:00.000	1970-01-01T16:52:24.839	157	0	0	0	43	0	0	0	0	0	1	0.045	100	0	44	0	0	0
0	0	0	0	0	0	0	1	0	0	0	269.184	0	0	0	3.4	103.4	0	0	0	-0.09	0	0	43	0	0	0	0	0	0	2019-02-14T01:00:00.000	1970-01-01T16:52:24.839	157	0	0	0	43	0	0	0	0	0	1	0.045	100	0	44	0	0	0
0	0	0	0	0	0	0	1	0	0	0	269.184	0	0	0	3.4	103.4	0	0	0	-0.09	0	0	43	0	0	0	0	0	0	2019-02-14T01:00:00.000	1970-01-01T16:52:24.839	157	0	0	0	43	0	0	0	0	0	1	0.045	100	0	44	0	0	0
0	0	0	0	0	0	0	1	0	0	0	269.184	0	0	0	3.4	103.4	0	0	0	-0.09	0	0	43	0	0	0	0	0	0	2019-02-14T01:00:00.000	1970-01-01T16:52:24.839	157	0	0	0	43	0	0	0	0	0	1	0.045	100	0	44	0	0	0
0	0	0	0	0	0	0	1	0	0	0	269.184	0	0	0	3.4	103.4	0	0	0	-0.095	0	0	43	0	0	0	0	0	0	2019-02-14T01:00:00.000	1970-01-01T16:52:25.149	157	0	0	0	43	0	0	0	0	0	1	0.052	100	0	44	0	0	0
0	0	0	0	0	0	0	1	0	0	0	269.184	0	0	0	3.4	103.4	0	0	0	-0.095	0	0	43	0	0	0	0	0	0	2019-02-14T01:00:00.000	1970-01-01T16:52:25.149	157	0	0	0	43	0	0	0	0	0	1	0.052	100	0	44	0	0	0
0	0	0	0	0	0	0	1	0	0	0	269.184	0	0	0	3.4	103.4	0	0	0	-0.095	0	0	43	0	0	0	0	0	0	2019-02-14T01:00:00.000	1970-01-01T16:52:25.149	157	0	0	0	43	0	0	0	0	0	1	0.052	100	0	44	0	0	0
0	0	0	0	0	0	0	1	0	0	0	269.184	0	0	0	3.4	103.4	0	0	0	-0.095	0	0	43	0	0	0	0	0	0	2019-02-14T01:00:00.000	1970-01-01T16:52:25.149	157	0	0	0	43	0	0	0	0	0	1	0.052	100	0	44	0	0	0
0	0	0	0	0	0	0	1	0	0	0	269.184	0	0	0	3.4	103.4	0	0	0	-0.095	0	0	43	0	0	0	0	0	0	2019-02-14T01:00:00.000	1970-01-01T16:52:25.149	157	0	0	0	43	0	0	0	0	0	1	0.052	100	0	44	0	0	0
0	0	0	0	0	0	0	1	0	0	0	269.184	0	0	0	3.4	103.4	0	0	0	-0.08	0	0	43	0	0	0	0	0	0	2019-02-14T01:00:00.000	1970-01-01T16:52:25.259	157	0	0	0	43	0	0	0	0	0	1	0.037	100	0	44	0	0	0
0	0	0	0	0	0	0	1	0	0	0	269.184	0	0	0	3.4	103.4	0	0	0	-0.08	0	0	43	0	0	0	0	0	0	2019-02-14T01:00:00.000	1970-01-01T16:52:25.259	157	0	0	0	43	0	0	0	0	0	1	0.037	100	0	44	0	0	0
0	0	0	0	0	0	0	1	0	0	0	269.184	0	0	0	3.4	103.4	0	0	0	-0.08	0	0	43	0	0	0	0	0	0	2019-02-14T01:00:00.000	1970-01-01T16:52:25.259	157	0	0	0	43	0	0	0	0	0	1	0.037	100	0	44	0	0	0
0	0	0	0	0	0	0	1	0	0	0	269.184	0	0	0	3.4	103.4	0	0	0	-0.08	0	0	43	0	0	0	0	0	0	2019-02-14T01:00:00.000	1970-01-01T16:52:25.259	157	0	0	0	43	0	0	0	0	0	1	0.037	100	0	44	0	0	0
0	0	0	0	0	0	0	1	0	0	0	269.184	0	0	0	3.4	103.4	0	0	0	-0.08	0	0	43	0	0	0	0	0	0	2019-02-14T01:00:00.000	1970-01-01T16:52:25.259	157	0	0	0	43	0	0	0	0	0	1	0.037	100	0	44	0	0	0
0	0	0	0	0	0	0	1	0	0	0	269.184	0	0	0	3.4	103.4	0	0	0	-0.095	0	0	43	0	0	0	0	0	0	2019-02-14T01:00:00.000	1970-01-01T16:52:25.379	157	0	0	0	43	0	0	0	0	0	1	0.037	100	0	44	0	0	0
0	0	0	0	0	0	0	1	0	0	0	269.184	0	0	0	3.4	103.4	0	0	0	-0.095	0	0	43	0	0	0	0	0	0	2019-02-14T01:00:00.000	1970-01-01T16:52:25.379	157	0	0	0	43	0	0	0	0	0	1	0.037	100	0	44	0	0	0
0	0	0	0	0	0	0	1	0	0	0	269.184	0	0	0	3.4	103.4	0	0	0	-0.095	0	0	43	0	0	0	0	0	0	2019-02-14T01:00:00.000	1970-01-01T16:52:25.379	157	0	0	0	43	0	0	0	0	0	1	0.037	100	0	44	0	0	0
0	0	0	0	0	0	0	1	0	0	0	269.184	0	0	0	3.4	103.4	0	0	0	-0.095	0	0	43	0	0	0	0	0	0	2019-02-14T01:00:00.000	1970-01-01T16:52:25.379	157	0	0	0	43	0	0	0	0	0	1	0.037	100	0	44	0	0	0
0	0	0	0	0	0	0	1	0	0	0	269.184	0	0	0	3.4	103.4	0	0	0	-0.095	0	0	43	0	0	0	0	0	0	2019-02-14T01:00:00.000	1970-01-01T16:52:25.379	157	0	0	0	43	0	0	0	0	0	1	0.037	100	0	44	0	0	0
0	0	0	0	0	0	0	1	0	0	0	269.184	0	0	0	3.4	103.4	0	0	0	-0.085	0	0	43	0	0	0	0	0	0	2019-02-14T01:00:00.000	1970-01-01T16:52:25.499	157	0	0	0	43	0	0	0	0	0	1	0.052	100	0	44	0	0	0
0	0	0	0	0	0	0	1	0	0	0	269.184	0	0	0	3.4	103.4	0	0	0	-0.085	0	0	43	0	0	0	0	0	0	2019-02-14T01:00:00.000	1970-01-01T16:52:25.499	157	0	0	0	43	0	0	0	0	0	1	0.052	100	0	44	0	0	0
0	0	0	0	0	0	0	1	0	0	0	269.184	0	0	0	3.4	103.4	0	0	0	-0.085	0	0	43	0	0	0	0	0	0	2019-02-14T01:00:00.000	1970-01-01T16:52:25.499	157	0	0	0	43	0	0	0	0	0	1	0.052	100	0	44	0	0	0
0	0	0	0	0	0	0	1	0	0	0	269.184	0	0	0	3.4	103.4	0	0	0	-0.085	0	0	43	0	0	0	0	0	0	2019-02-14T01:00:00.000	1970-01-01T16:52:25.499	157	0	0	0	43	0	0	0	0	0	1	0.052	100	0	44	0	0	0
0	0	0	0	0	0	0	1	0	0	0	269.184	0	0	0	3.4	103.4	0	0	0	-0.085	0	0	43	0	0	0	0	0	0	2019-02-14T01:00:00.000	1970-01-01T16:52:25.499	157	0	0	0	43	0	0	0	0	0	1	0.052	100	0	44	0	0	0
0	0	0	0	0	0	0	1	0	0	0	269.184	0	0	0	3.4	103.4	0	0	0	-0.085	0	0	43	0	0	0	0	0	0	2019-02-14T01:00:00.000	1970-01-01T16:52:25.619	157	0	0	0	43	0	0	0	0	0	1	0.037	100	0	44	0	0	0
0	0	0	0	0	0	0	1	0	0	0	269.184	0	0	0	3.4	103.4	0	0	0	-0.085	0	0	43	0	0	0	0	0	0	2019-02-14T01:00:00.000	1970-01-01T16:52:25.619	157	0	0	0	43	0	0	0	0	0	1	0.037	100	0	44	0	0	0
0	0	0	0	0	0	0	1	0	0	0	269.184	0	0	0	3.4	103.4	0	0	0	-0.085	0	0	43	0	0	0	0	0	0	2019-02-14T01:00:00.000	1970-01-01T16:52:25.619	157	0	0	0	43	0	0	0	0	0	1	0.037	100	0	44	0	0	0
0	0	0	0	0	0	0	1	0	0	0	269.184	0	0	0	3.4	103.4	0	0	0	-0.085	0	0	43	0	0	0	0	0	0	2019-02-14T01:00:00.000	1970-01-01T16:52:25.619	157	0	0	0	43	0	0	0	0	0	1	0.037	100	0	44	0	0	0
0	0	0	0	0	0	0	1	0	0	0	269.184	0	0	0	3.4	103.4	0	0	0	-0.085	0	0	43	0	0	0	0	0	0	2019-02-14T01:00:00.000	1970-01-01T16:52:25.619	157	0	0	0	43	0	0	0	0	0	1	0.037	100	0	44	0	0	0
0	0	0	0	0	0	0	1	0	0	0	269.184	0	0	0	3.4	103.4	0	0	0	-0.075	0	0	43	0	0	0	0	0	0	2019-02-14T01:00:00.000	1970-01-01T16:52:25.739	157	0	0	0	43	0	0	0	0	0	1	0.037	100	0	44	0	0	0
0	0	0	0	0	0	0	1	0	0	0	269.184	0	0	0	3.4	103.4	0	0	0	-0.075	0	0	43	0	0	0	0	0	0	2019-02-14T01:00:00.000	1970-01-01T16:52:25.739	157	0	0	0	43	0	0	0	0	0	1	0.037	100	0	44	0	0	0
0	0	0	0	0	0	0	1	0	0	0	269.184	0	0	0	3.4	103.4	0	0	0	-0.075	0	0	43	0	0	0	0	0	0	2019-02-14T01:00:00.000	1970-01-01T16:52:25.739	157	0	0	0	43	0	0	0	0	0	1	0.037	100	0	44	0	0	0
0	0	0	0	0	0	0	1	0	0	0	269.184	0	0	0	3.4	103.4	0	0	0	-0.075	0	0	43	0	0	0	0	0	0	2019-02-14T01:00:00.000	1970-01-01T16:52:25.739	157	0	0	0	43	0	0	0	0	0	1	0.037	100	0	44	0	0	0
0	0	0	0	0	0	0	1	0	0	0	269.184	0	0	0	3.4	103.4	0	0	0	-0.075	0	0	43	0	0	0	0	0	0	2019-02-14T01:00:00.000	1970-01-01T16:52:25.739	157	0	0	0	43	0	0	0	0	0	1	0.037	100	0	44	0	0	0
0	0	0	0	0	0	0	1	0	0	0	269.184	0	0	0	3.4	103.4	0	0	0	-0.085	0	0	43	0	0	0	0	0	0	2019-02-14T01:00:00.000	1970-01-01T16:52:25.849	157	0	0	0	43	0	0	0	0	0	1	0.045	100	0	44	0	0	0
0	0	0	0	0	0	0	1	0	0	0	269.184	0	0	0	3.4	103.4	0	0	0	-0.085	0	0	43	0	0	0	0	0	0	2019-02-14T01:00:00.000	1970-01-01T16:52:25.849	157	0	0	0	43	0	0	0	0	0	1	0.045	100	0	44	0	0	0
0	0	0	0	0	0	0	1	0	0	0	269.184	0	0	0	3.4	103.4	0	0	0	-0.085	0	0	43	0	0	0	0	0	0	2019-02-14T01:00:00.000	1970-01-01T16:52:25.849	157	0	0	0	43	0	0	0	0	0	1	0.045	100	0	44	0	0	0
0	0	0	0	0	0	0	1	0	0	0	269.184	0	0	0	3.4	103.4	0	0	0	-0.085	0	0	43	0	0	0	0	0	0	2019-02-14T01:00:00.000	1970-01-01T16:52:25.849	157	0	0	0	43	0	0	0	0	0	1	0.045	100	0	44	0	0	0
0	0	0	0	0	0	0	1	0	0	0	269.184	0	0	0	3.4	103.4	0	0	0	-0.085	0	0	43	0	0	0	0	0	0	2019-02-14T01:00:00.000	1970-01-01T16:52:25.959	157	0	0	0	43	0	0	0	0	0	1	0.045	100	0	44	0	0	0
0	0	0	0	0	0	0	1	0	0	0	269.184	0	0	0	3.4	103.4	0	0	0	-0.085	0	0	43	0	0	0	0	0	0	2019-02-14T01:00:00.000	1970-01-01T16:52:25.959	157	0	0	0	43	0	0	0	0	0	1	0.045	100	0	44	0	0	0
0	0	0	0	0	0	0	1	0	0	0	269.184	0	0	0	3.4	103.4	0	0	0	-0.085	0	0	43	0	0	0	0	0	0	2019-02-14T01:00:00.000	1970-01-01T16:52:25.959	157	0	0	0	43	0	0	0	0	0	1	0.045	100	0	44	0	0	0
0	0	0	0	0	0	0	1	0	0	0	269.184	0	0	0	3.4	103.4	0	0	0	-0.085	0	0	43	0	0	0	0	0	0	2019-02-14T01:00:00.000	1970-01-01T16:52:25.959	157	0	0	0	43	0	0	0	0	0	1	0.045	100	0	44	0	0	0
0	0	0	0	0	0	0	1	0	0	0	269.184	0	0	0	3.4	103.4	0	0	0	-0.085	0	0	43	0	0	0	0	0	0	2019-02-14T01:00:00.000	1970-01-01T16:52:25.959	157	0	0	0	43	0	0	0	0	0	1	0.045	100	0	44	0	0	0
0	0	0	0	0	0	0	1	0	0	0	269.184	0	0	0	3.4	103.4	0	0	0	-0.09	0	0	43	0	0	0	0	0	0	2019-02-14T01:00:00.000	1970-01-01T16:52:26.079	157	0	0	0	43	0	0	0	0	0	1	0.037	100	0	44	0	0	0
0	0	0	0	0	0	0	1	0	0	0	269.184	0	0	0	3.4	103.4	0	0	0	-0.09	0	0	43	0	0	0	0	0	0	2019-02-14T01:00:00.000	1970-01-01T16:52:26.079	157	0	0	0	43	0	0	0	0	0	1	0.037	100	0	44	0	0	0
0	0	0	0	0	0	0	1	0	0	0	269.184	0	0	0	3.4	103.4	0	0	0	-0.09	0	0	43	0	0	0	0	0	0	2019-02-14T01:00:00.000	1970-01-01T16:52:26.079	157	0	0	0	43	0	0	0	0	0	1	0.037	100	0	44	0	0	0
0	0	0	0	0	0	0	1	0	0	0	269.184	0	0	0	3.4	103.4	0	0	0	-0.09	0	0	43	0	0	0	0	0	0	2019-02-14T01:00:00.000	1970-01-01T16:52:26.079	157	0	0	0	43	0	0	0	0	0	1	0.037	100	0	44	0	0	0
0	0	0	0	0	0	0	1	0	0	0	269.184	0	0	0	3.4	103.4	0	0	0	-0.09	0	0	43	0	0	0	0	0	0	2019-02-14T01:00:00.000	1970-01-01T16:52:26.079	157	0	0	0	43	0	0	0	0	0	1	0.037	100	0	44	0	0	0
0	0	0	0	0	0	0	1	0	0	0	269.184	0	0	0	3.4	103.4	0	0	0	-0.095	0	0	43	0	0	0	0	0	0	2019-02-14T01:00:00.000	1970-01-01T16:52:26.199	157	0	0	0	43	0	0	0	0	0	1	0.037	100	0	44	0	0	0
0	0	0	0	0	0	0	1	0	0	0	269.184	0	0	0	3.4	103.4	0	0	0	-0.095	0	0	43	0	0	0	0	0	0	2019-02-14T01:00:00.000	1970-01-01T16:52:26.199	157	0	0	0	43	0	0	0	0	0	1	0.037	100	0	44	0	0	0
0	0	0	0	0	0	0	1	0	0	0	269.184	0	0	0	3.4	103.4	0	0	0	-0.095	0	0	43	0	0	0	0	0	0	2019-02-14T01:00:00.000	1970-01-01T16:52:26.199	157	0	0	0	43	0	0	0	0	0	1	0.037	100	0	44	0	0	0
0	0	0	0	0	0	0	1	0	0	0	269.184	0	0	0	3.4	103.4	0	0	0	-0.095	0	0	43	0	0	0	0	0	0	2019-02-14T01:00:00.000	1970-01-01T16:52:26.199	157	0	0	0	43	0	0	0	0	0	1	0.037	100	0	44	0	0	0
0	0	0	0	0	0	0	1	0	0	0	269.184	0	0	0	3.4	103.4	0	0	0	-0.095	0	0	43	0	0	0	0	0	0	2019-02-14T01:00:00.000	1970-01-01T16:52:26.199	157	0	0	0	43	0	0	0	0	0	1	0.037	100	0	44	0	0	0
0	0	0	0	0	0	0	1	0	0	0	269.184	0	0	0	3.4	103.4	0	0	0	-0.09	0	0	43	0	0	0	0	0	0	2019-02-14T01:00:00.000	1970-01-01T16:52:26.309	157	0	0	0	43	0	0	0	0	0	1	0.052	100	0	44	0	0	0
0	0	0	0	0	0	0	1	0	0	0	269.184	0	0	0	3.4	103.4	0	0	0	-0.09	0	0	43	0	0	0	0	0	0	2019-02-14T01:00:00.000	1970-01-01T16:52:26.309	157	0	0	0	43	0	0	0	0	0	1	0.052	100	0	44	0	0	0
0	0	0	0	0	0	0	1	0	0	0	269.184	0	0	0	3.4	103.4	0	0	0	-0.09	0	0	43	0	0	0	0	0	0	2019-02-14T01:00:00.000	1970-01-01T16:52:26.309	157	0	0	0	43	0	0	0	0	0	1	0.052	100	0	44	0	0	0
0	0	0	0	0	0	0	1	0	0	0	269.184	0	0	0	3.4	103.4	0	0	0	-0.09	0	0	43	0	0	0	0	0	0	2019-02-14T01:00:00.000	1970-01-01T16:52:26.309	157	0	0	0	43	0	0	0	0	0	1	0.052	100	0	44	0	0	0
0	0	0	0	0	0	0	1	0	0	0	269.184	0	0	0	3.4	103.4	0	0	0	-0.09	0	0	43	0	0	0	0	0	0	2019-02-14T01:00:00.000	1970-01-01T16:52:26.309	157	0	0	0	43	0	0	0	0	0	1	0.052	100	0	44	0	0	0
0	0	0	0	0	0	0	1	0	0	0	269.184	0	0	0	3.4	103.4	0	0	0	-0.09	0	0	43	0	0	0	0	0	0	2019-02-14T01:00:00.000	1970-01-01T16:52:26.429	157	0	0	0	43	0	0	0	0	0	1	0.037	100	0	44	0	0	0
0	0	0	0	0	0	0	1	0	0	0	269.184	0	0	0	3.4	103.4	0	0	0	-0.09	0	0	43	0	0	0	0	0	0	2019-02-14T01:00:00.000	1970-01-01T16:52:26.429	157	0	0	0	43	0	0	0	0	0	1	0.037	100	0	44	0	0	0
0	0	0	0	0	0	0	1	0	0	0	269.184	0	0	0	3.4	103.4	0	0	0	-0.09	0	0	43	0	0	0	0	0	0	2019-02-14T01:00:00.000	1970-01-01T16:52:26.429	157	0	0	0	43	0	0	0	0	0	1	0.037	100	0	44	0	0	0
0	0	0	0	0	0	0	1	0	0	0	269.184	0	0	0	3.4	103.4	0	0	0	-0.09	0	0	43	0	0	0	0	0	0	2019-02-14T01:00:00.000	1970-01-01T16:52:26.429	157	0	0	0	43	0	0	0	0	0	1	0.037	100	0	44	0	0	0
0	0	0	0	0	0	0	1	0	0	0	269.184	0	0	0	3.4	103.4	0	0	0	-0.09	0	0	43	0	0	0	0	0	0	2019-02-14T01:00:00.000	1970-01-01T16:52:26.429	157	0	0	0	43	0	0	0	0	0	1	0.037	100	0	44	0	0	0
0	0	0	0	0	0	0	1	0	0	0	269.184	0	0	0	3.4	103.4	0	0	0	-0.08	0	0	43	0	0	0	0	0	0	2019-02-14T01:00:00.000	1970-01-01T16:52:26.549	157	0	0	0	43	0	0	0	0	0	1	0.052	100	0	44	0	0	0
0	0	0	0	0	0	0	1	0	0	0	269.184	0	0	0	3.4	103.4	0	0	0	-0.08	0	0	43	0	0	0	0	0	0	2019-02-14T01:00:00.000	1970-01-01T16:52:26.549	157	0	0	0	43	0	0	0	0	0	1	0.052	100	0	44	0	0	0
0	0	0	0	0	0	0	1	0	0	0	269.184	0	0	0	3.4	103.4	0	0	0	-0.08	0	0	43	0	0	0	0	0	0	2019-02-14T01:00:00.000	1970-01-01T16:52:26.549	157	0	0	0	43	0	0	0	0	0	1	0.052	100	0	44	0	0	0
0	0	0	0	0	0	0	1	0	0	0	269.184	0	0	0	3.4	103.4	0	0	0	-0.08	0	0	43	0	0	0	0	0	0	2019-02-14T01:00:00.000	1970-01-01T16:52:26.549	157	0	0	0	43	0	0	0	0	0	1	0.052	100	0	44	0	0	0
0	0	0	0	0	0	0	1	0	0	0	269.184	0	0	0	3.4	103.4	0	0	0	-0.08	0	0	43	0	0	0	0	0	0	2019-02-14T01:00:00.000	1970-01-01T16:52:26.549	157	0	0	0	43	0	0	0	0	0	1	0.052	100	0	44	0	0	0
0	0	0	0	0	0	0	1	0	0	0	269.184	0	0	0	3.4	103.4	0	0	0	-0.085	0	0	43	0	0	0	0	0	0	2019-02-14T01:00:00.000	1970-01-01T16:52:26.669	157	0	0	0	43	0	0	0	0	0	1	0.03	100	0	44	0	0	0
0	0	0	0	0	0	0	1	0	0	0	269.184	0	0	0	3.4	103.4	0	0	0	-0.085	0	0	43	0	0	0	0	0	0	2019-02-14T01:00:00.000	1970-01-01T16:52:26.669	157	0	0	0	43	0	0	0	0	0	1	0.03	100	0	44	0	0	0
0	0	0	0	0	0	0	1	0	0	0	269.184	0	0	0	3.4	103.4	0	0	0	-0.085	0	0	43	0	0	0	0	0	0	2019-02-14T01:00:00.000	1970-01-01T16:52:26.669	157	0	0	0	43	0	0	0	0	0	1	0.03	100	0	44	0	0	0
0	0	0	0	0	0	0	1	0	0	0	269.184	0	0	0	3.4	103.4	0	0	0	-0.085	0	0	43	0	0	0	0	0	0	2019-02-14T01:00:00.000	1970-01-01T16:52:26.669	157	0	0	0	43	0	0	0	0	0	1	0.03	100	0	44	0	0	0
0	0	0	0	0	0	0	1	0	0	0	269.184	0	0	0	3.4	103.4	0	0	0	-0.085	0	0	43	0	0	0	0	0	0	2019-02-14T01:00:00.000	1970-01-01T16:52:26.669	157	0	0	0	43	0	0	0	0	0	1	0.03	100	0	44	0	0	0
0	0	0	0	0	0	0	1	0	0	0	269.184	0	0	0	3.4	103.4	0	0	0	-0.09	0	0	43	0	0	0	0	0	0	2019-02-14T01:00:00.000	1970-01-01T16:52:26.779	157	0	0	0	43	0	0	0	0	0	1	0.037	100	0	44	0	0	0
0	0	0	0	0	0	0	1	0	0	0	269.184	0	0	0	3.4	103.4	0	0	0	-0.09	0	0	43	0	0	0	0	0	0	2019-02-14T01:00:00.000	1970-01-01T16:52:26.779	157	0	0	0	43	0	0	0	0	0	1	0.037	100	0	44	0	0	0
0	0	0	0	0	0	0	1	0	0	0	269.184	0	0	0	3.4	103.4	0	0	0	-0.09	0	0	43	0	0	0	0	0	0	2019-02-14T01:00:00.000	1970-01-01T16:52:26.779	157	0	0	0	43	0	0	0	0	0	1	0.037	100	0	44	0	0	0
0	0	0	0	0	0	0	1	0	0	0	269.184	0	0	0	3.4	103.4	0	0	0	-0.09	0	0	43	0	0	0	0	0	0	2019-02-14T01:00:00.000	1970-01-01T16:52:26.779	157	0	0	0	43	0	0	0	0	0	1	0.037	100	0	44	0	0	0
0	0	0	0	0	0	0	1	0	0	0	269.184	0	0	0	3.4	103.4	0	0	0	-0.09	0	0	43	0	0	0	0	0	0	2019-02-14T01:00:00.000	1970-01-01T16:52:26.779	157	0	0	0	43	0	0	0	0	0	1	0.037	100	0	44	0	0	0
0	0	0	0	0	0	0	1	0	0	0	269.184	0	0	0	3.4	103.4	0	0	0	-0.09	0	0	43	0	0	0	0	0	0	2019-02-14T01:00:00.000	1970-01-01T16:52:26.899	157	0	0	0	43	0	0	0	0	0	1	0.052	100	0	44	0	0	0
0	0	0	0	0	0	0	1	0	0	0	269.184	0	0	0	3.4	103.4	0	0	0	-0.09	0	0	43	0	0	0	0	0	0	2019-02-14T01:00:00.000	1970-01-01T16:52:26.899	157	0	0	0	43	0	0	0	0	0	1	0.052	100	0	44	0	0	0
0	0	0	0	0	0	0	1	0	0	0	269.184	0	0	0	3.4	103.4	0	0	0	-0.09	0	0	43	0	0	0	0	0	0	2019-02-14T01:00:00.000	1970-01-01T16:52:26.899	157	0	0	0	43	0	0	0	0	0	1	0.052	100	0	44	0	0	0
0	0	0	0	0	0	0	1	0	0	0	269.184	0	0	0	3.4	103.4	0	0	0	-0.09	0	0	43	0	0	0	0	0	0	2019-02-14T01:00:00.000	1970-01-01T16:52:26.899	157	0	0	0	43	0	0	0	0	0	1	0.052	100	0	44	0	0	0
0	0	0	0	0	0	0	1	0	0	0	269.184	0	0	0	3.4	103.4	0	0	0	-0.09	0	0	43	0	0	0	0	0	0	2019-02-14T01:00:00.000	1970-01-01T16:52:26.899	157	0	0	0	43	0	0	0	0	0	1	0.052	100	0	44	0	0	0
0	0	0	0	0	0	0	1	0	0	0	269.184	0	0	0	3.4	103.4	0	0	0	-0.09	0	0	43	0	0	0	0	0	0	2019-02-14T01:00:00.000	1970-01-01T16:52:27.019	157	0	0	0	43	0	0	0	0	0	1	0.037	100	0	44	0	0	0
0	0	0	0	0	0	0	1	0	0	0	269.184	0	0	0	3.4	103.4	0	0	0	-0.09	0	0	43	0	0	0	0	0	0	2019-02-14T01:00:00.000	1970-01-01T16:52:27.019	157	0	0	0	43	0	0	0	0	0	1	0.037	100	0	44	0	0	0
0	0	0	0	0	0	0	1	0	0	0	269.184	0	0	0	3.4	103.4	0	0	0	-0.09	0	0	43	0	0	0	0	0	0	2019-02-14T01:00:00.000	1970-01-01T16:52:27.019	157	0	0	0	43	0	0	0	0	0	1	0.037	100	0	44	0	0	0
0	0	0	0	0	0	0	1	0	0	0	269.184	0	0	0	3.4	103.4	0	0	0	-0.09	0	0	43	0	0	0	0	0	0	2019-02-14T01:00:00.000	1970-01-01T16:52:27.019	157	0	0	0	43	0	0	0	0	0	1	0.037	100	0	44	0	0	0
0	0	0	0	0	0	0	1	0	0	0	269.184	0	0	0	3.4	103.4	0	0	0	-0.09	0	0	43	0	0	0	0	0	0	2019-02-14T01:00:00.000	1970-01-01T16:52:27.019	157	0	0	0	43	0	0	0	0	0	1	0.037	100	0	44	0	0	0
0	0	0	0	0	0	0	1	0	0	0	269.184	0	0	0	3.4	103.4	0	0	0	-0.08	0	0	43	0	0	0	0	0	0	2019-02-14T01:00:00.000	1970-01-01T16:52:27.129	157	0	0	0	43	0	0	0	0	0	1	0.037	100	0	44	0	0	0
0	0	0	0	0	0	0	1	0	0	0	269.184	0	0	0	3.4	103.4	0	0	0	-0.08	0	0	43	0	0	0	0	0	0	2019-02-14T01:00:00.000	1970-01-01T16:52:27.129	157	0	0	0	43	0	0	0	0	0	1	0.037	100	0	44	0	0	0
0	0	0	0	0	0	0	1	0	0	0	269.184	0	0	0	3.4	103.4	0	0	0	-0.08	0	0	43	0	0	0	0	0	0	2019-02-14T01:00:00.000	1970-01-01T16:52:27.129	157	0	0	0	43	0	0	0	0	0	1	0.037	100	0	44	0	0	0
0	0	0	0	0	0	0	1	0	0	0	269.184	0	0	0	3.4	103.4	0	0	0	-0.08	0	0	43	0	0	0	0	0	0	2019-02-14T01:00:00.000	1970-01-01T16:52:27.129	157	0	0	0	43	0	0	0	0	0	1	0.037	100	0	44	0	0	0
0	0	0	0	0	0	0	1	0	0	0	269.184	0	0	0	3.4	103.4	0	0	0	-0.08	0	0	43	0	0	0	0	0	0	2019-02-14T01:00:00.000	1970-01-01T16:52:27.129	157	0	0	0	43	0	0	0	0	0	1	0.037	100	0	44	0	0	0
0	0	0	0	0	0	0	1	0	0	0	269.184	0	0	0	3.4	103.4	0	0	0	-0.085	0	0	43	0	0	0	0	0	0	2019-02-14T01:00:00.000	1970-01-01T16:52:27.249	157	0	0	0	43	0	0	0	0	0	1	0.03	100	0	44	0	0	0
0	0	0	0	0	0	0	1	0	0	0	269.184	0	0	0	3.4	103.4	0	0	0	-0.085	0	0	43	0	0	0	0	0	0	2019-02-14T01:00:00.000	1970-01-01T16:52:27.249	157	0	0	0	43	0	0	0	0	0	1	0.03	100	0	44	0	0	0
0	0	0	0	0	0	0	1	0	0	0	269.184	0	0	0	3.4	103.4	0	0	0	-0.085	0	0	43	0	0	0	0	0	0	2019-02-14T01:00:00.000	1970-01-01T16:52:27.249	157	0	0	0	43	0	0	0	0	0	1	0.03	100	0	44	0	0	0
0	0	0	0	0	0	0	1	0	0	0	269.184	0	0	0	3.4	103.4	0	0	0	-0.085	0	0	43	0	0	0	0	0	0	2019-02-14T01:00:00.000	1970-01-01T16:52:27.249	157	0	0	0	43	0	0	0	0	0	1	0.03	100	0	44	0	0	0
0	0	0	0	0	0	0	1	0	0	0	269.184	0	0	0	3.4	103.4	0	0	0	-0.085	0	0	43	0	0	0	0	0	0	2019-02-14T01:00:00.000	1970-01-01T16:52:27.249	157	0	0	0	43	0	0	0	0	0	1	0.03	100	0	44	0	0	0
0	0	0	0	0	0	0	1	0	0	0	269.184	0	0	0	3.4	103.4	0	0	0	-0.09	0	0	43	0	0	0	0	0	0	2019-02-14T01:00:00.000	1970-01-01T16:52:27.369	157	0	0	0	43	0	0	0	0	0	1	0.06	100	0	44	0	0	0
0	0	0	0	0	0	0	1	0	0	0	269.184	0	0	0	3.4	103.4	0	0	0	-0.09	0	0	43	0	0	0	0	0	0	2019-02-14T01:00:00.000	1970-01-01T16:52:27.369	157	0	0	0	43	0	0	0	0	0	1	0.06	100	0	44	0	0	0
0	0	0	0	0	0	0	1	0	0	0	269.184	0	0	0	3.4	103.4	0	0	0	-0.09	0	0	43	0	0	0	0	0	0	2019-02-14T01:00:00.000	1970-01-01T16:52:27.369	157	0	0	0	43	0	0	0	0	0	1	0.06	100	0	44	0	0	0
0	0	0	0	0	0	0	1	0	0	0	269.184	0	0	0	3.4	103.4	0	0	0	-0.09	0	0	43	0	0	0	0	0	0	2019-02-14T01:00:00.000	1970-01-01T16:52:27.369	157	0	0	0	43	0	0	0	0	0	1	0.06	100	0	44	0	0	0
0	0	0	0	0	0	0	1	0	0	0	269.184	0	0	0	3.4	103.4	0	0	0	-0.09	0	0	43	0	0	0	0	0	0	2019-02-14T01:00:00.000	1970-01-01T16:52:27.369	157	0	0	0	43	0	0	0	0	0	1	0.06	100	0	44	0	0	0
0	0	0	0	0	0	0	1	0	0	0	269.184	0	0	0	3.4	103.4	0	0	0	-0.08	0	0	43	0	0	0	0	0	0	2019-02-14T01:00:00.000	1970-01-01T16:52:27.489	157	0	0	0	43	0	0	0	0	0	1	0.052	100	0	44	0	0	0
0	0	0	0	0	0	0	1	0	0	0	269.184	0	0	0	3.4	103.4	0	0	0	-0.08	0	0	43	0	0	0	0	0	0	2019-02-14T01:00:00.000	1970-01-01T16:52:27.489	157	0	0	0	43	0	0	0	0	0	1	0.052	100	0	44	0	0	0
0	0	0	0	0	0	0	1	0	0	0	269.184	0	0	0	3.4	103.4	0	0	0	-0.08	0	0	43	0	0	0	0	0	0	2019-02-14T01:00:00.000	1970-01-01T16:52:27.489	157	0	0	0	43	0	0	0	0	0	1	0.052	100	0	44	0	0	0
0	0	0	0	0	0	0	1	0	0	0	269.184	0	0	0	3.4	103.4	0	0	0	-0.08	0	0	43	0	0	0	0	0	0	2019-02-14T01:00:00.000	1970-01-01T16:52:27.489	157	0	0	0	43	0	0	0	0	0	1	0.052	100	0	44	0	0	0
0	0	0	0	0	0	0	1	0	0	0	269.184	0	0	0	3.4	103.4	0	0	0	-0.08	0	0	43	0	0	0	0	0	0	2019-02-14T01:00:00.000	1970-01-01T16:52:27.489	157	0	0	0	43	0	0	0	0	0	1	0.052	100	0	44	0	0	0
0	0	0	0	0	0	0	1	0	0	0	269.184	0	0	0	3.4	103.4	0	0	0	-0.085	0	0	43	0	0	0	0	0	0	2019-02-14T01:00:00.000	1970-01-01T16:52:27.599	157	0	0	0	43	0	0	0	0	0	1	0.03	100	0	44	0	0	0
0	0	0	0	0	0	0	1	0	0	0	269.184	0	0	0	3.4	103.4	0	0	0	-0.085	0	0	43	0	0	0	0	0	0	2019-02-14T01:00:00.000	1970-01-01T16:52:27.599	157	0	0	0	43	0	0	0	0	0	1	0.03	100	0	44	0	0	0
0	0	0	0	0	0	0	1	0	0	0	269.184	0	0	0	3.4	103.4	0	0	0	-0.085	0	0	43	0	0	0	0	0	0	2019-02-14T01:00:00.000	1970-01-01T16:52:27.599	157	0	0	0	43	0	0	0	0	0	1	0.03	100	0	44	0	0	0
0	0	0	0	0	0	0	1	0	0	0	269.184	0	0	0	3.4	103.4	0	0	0	-0.085	0	0	43	0	0	0	0	0	0	2019-02-14T01:00:00.000	1970-01-01T16:52:27.599	157	0	0	0	43	0	0	0	0	0	1	0.03	100	0	44	0	0	0
0	0	0	0	0	0	0	1	0	0	0	269.184	0	0	0	3.4	103.4	0	0	0	-0.085	0	0	43	0	0	0	0	0	0	2019-02-14T01:00:00.000	1970-01-01T16:52:27.599	157	0	0	0	43	0	0	0	0	0	1	0.03	100	0	44	0	0	0
0	0	0	0	0	0	0	1	0	0	0	269.184	0	0	0	3.4	103.4	0	0	0	-0.1	0	0	43	0	0	0	0	0	0	2019-02-14T01:00:00.000	1970-01-01T16:52:27.719	157	0	0	0	43	0	0	0	0	0	1	0.045	100	0	44	0	0	0
0	0	0	0	0	0	0	1	0	0	0	269.184	0	0	0	3.4	103.4	0	0	0	-0.1	0	0	43	0	0	0	0	0	0	2019-02-14T01:00:00.000	1970-01-01T16:52:27.719	157	0	0	0	43	0	0	0	0	0	1	0.045	100	0	44	0	0	0
0	0	0	0	0	0	0	1	0	0	0	269.184	0	0	0	3.4	103.4	0	0	0	-0.1	0	0	43	0	0	0	0	0	0	2019-02-14T01:00:00.000	1970-01-01T16:52:27.719	157	0	0	0	43	0	0	0	0	0	1	0.045	100	0	44	0	0	0
0	0	0	0	0	0	0	1	0	0	0	269.184	0	0	0	3.4	103.4	0	0	0	-0.1	0	0	43	0	0	0	0	0	0	2019-02-14T01:00:00.000	1970-01-01T16:52:27.719	157	0	0	0	43	0	0	0	0	0	1	0.045	100	0	44	0	0	0
0	0	0	0	0	0	0	1	0	0	0	269.184	0	0	0	3.4	103.4	0	0	0	-0.1	0	0	43	0	0	0	0	0	0	2019-02-14T01:00:00.000	1970-01-01T16:52:27.719	157	0	0	0	43	0	0	0	0	0	1	0.045	100	0	44	0	0	0
0	0	0	0	0	0	0	1	0	0	0	269.184	0	0	0	3.4	103.4	0	0	0	-0.075	0	0	43	0	0	0	0	0	0	2019-02-14T01:00:00.000	1970-01-01T16:52:27.839	157	0	0	0	43	0	0	0	0	0	1	0.052	100	0	44	0	0	0
0	0	0	0	0	0	0	1	0	0	0	269.184	0	0	0	3.4	103.4	0	0	0	-0.075	0	0	43	0	0	0	0	0	0	2019-02-14T01:00:00.000	1970-01-01T16:52:27.839	157	0	0	0	43	0	0	0	0	0	1	0.052	100	0	44	0	0	0
0	0	0	0	0	0	0	1	0	0	0	269.184	0	0	0	3.4	103.4	0	0	0	-0.075	0	0	43	0	0	0	0	0	0	2019-02-14T01:00:00.000	1970-01-01T16:52:27.839	157	0	0	0	43	0	0	0	0	0	1	0.052	100	0	44	0	0	0
0	0	0	0	0	0	0	1	0	0	0	269.184	0	0	0	3.4	103.4	0	0	0	-0.075	0	0	43	0	0	0	0	0	0	2019-02-14T01:00:00.000	1970-01-01T16:52:27.839	157	0	0	0	43	0	0	0	0	0	1	0.052	100	0	44	0	0	0
0	0	0	0	0	0	0	1	0	0	0	269.184	0	0	0	3.4	103.4	0	0	0	-0.075	0	0	43	0	0	0	0	0	0	2019-02-14T01:00:00.000	1970-01-01T16:52:27.839	157	0	0	0	43	0	0	0	0	0	1	0.052	100	0	44	0	0	0
0	0	0	0	0	0	0	1	0	0	0	269.184	0	0	0	3.4	103.4	0	0	0	-0.075	0	0	43	0	0	0	0	0	0	2019-02-14T01:00:00.000	1970-01-01T16:52:27.959	157	0	0	0	43	0	0	0	0	0	1	0.045	100	0	44	0	0	0
0	0	0	0	0	0	0	1	0	0	0	269.184	0	0	0	3.4	103.4	0	0	0	-0.075	0	0	43	0	0	0	0	0	0	2019-02-14T01:00:00.000	1970-01-01T16:52:27.959	157	0	0	0	43	0	0	0	0	0	1	0.045	100	0	44	0	0	0
0	0	0	0	0	0	0	1	0	0	0	269.184	0	0	0	3.4	103.4	0	0	0	-0.075	0	0	43	0	0	0	0	0	0	2019-02-14T01:00:00.000	1970-01-01T16:52:27.959	157	0	0	0	43	0	0	0	0	0	1	0.045	100	0	44	0	0	0
0	0	0	0	0	0	0	1	0	0	0	269.184	0	0	0	3.4	103.4	0	0	0	-0.075	0	0	43	0	0	0	0	0	0	2019-02-14T01:00:00.000	1970-01-01T16:52:27.959	157	0	0	0	43	0	0	0	0	0	1	0.045	100	0	44	0	0	0
0	0	0	0	0	0	0	1	0	0	0	269.184	0	0	0	3.4	103.4	0	0	0	-0.075	0	0	43	0	0	0	0	0	0	2019-02-14T01:00:00.000	1970-01-01T16:52:27.959	157	0	0	0	43	0	0	0	0	0	1	0.045	100	0	44	0	0	0
0	0	0	0	0	0	0	1	0	0	0	269.184	0	0	0	3.4	103.4	0	0	0	-0.085	0	0	43	0	0	0	0	0	0	2019-02-14T01:00:00.000	1970-01-01T16:52:28.079	157	0	0	0	43	0	0	0	0	0	1	0.037	100	0	44	0	0	0
0	0	0	0	0	0	0	1	0	0	0	269.184	0	0	0	3.4	103.4	0	0	0	-0.085	0	0	43	0	0	0	0	0	0	2019-02-14T01:00:00.000	1970-01-01T16:52:28.079	157	0	0	0	43	0	0	0	0	0	1	0.037	100	0	44	0	0	0
0	0	0	0	0	0	0	1	0	0	0	269.184	0	0	0	3.4	103.4	0	0	0	-0.085	0	0	43	0	0	0	0	0	0	2019-02-14T01:00:00.000	1970-01-01T16:52:28.079	157	0	0	0	43	0	0	0	0	0	1	0.037	100	0	44	0	0	0
0	0	0	0	0	0	0	1	0	0	0	269.184	0	0	0	3.4	103.4	0	0	0	-0.085	0	0	43	0	0	0	0	0	0	2019-02-14T01:00:00.000	1970-01-01T16:52:28.079	157	0	0	0	43	0	0	0	0	0	1	0.037	100	0	44	0	0	0
0	0	0	0	0	0	0	1	0	0	0	269.184	0	0	0	3.4	103.4	0	0	0	-0.085	0	0	43	0	0	0	0	0	0	2019-02-14T01:00:00.000	1970-01-01T16:52:28.079	157	0	0	0	43	0	0	0	0	0	1	0.037	100	0	44	0	0	0
0	0	0	0	0	0	0	1	0	0	0	269.184	0	0	0	3.4	103.4	0	0	0	-0.095	0	0	43	0	0	0	0	0	0	2019-02-14T01:00:00.000	1970-01-01T16:52:28.189	157	0	0	0	43	0	0	0	0	0	1	0.06	100	0	44	0	0	0
0	0	0	0	0	0	0	1	0	0	0	269.184	0	0	0	3.4	103.4	0	0	0	-0.095	0	0	43	0	0	0	0	0	0	2019-02-14T01:00:00.000	1970-01-01T16:52:28.189	157	0	0	0	43	0	0	0	0	0	1	0.06	100	0	44	0	0	0
0	0	0	0	0	0	0	1	0	0	0	269.184	0	0	0	3.4	103.4	0	0	0	-0.095	0	0	43	0	0	0	0	0	0	2019-02-14T01:00:00.000	1970-01-01T16:52:28.189	157	0	0	0	43	0	0	0	0	0	1	0.06	100	0	44	0	0	0
0	0	0	0	0	0	0	1	0	0	0	269.184	0	0	0	3.4	103.4	0	0	0	-0.095	0	0	43	0	0	0	0	0	0	2019-02-14T01:00:00.000	1970-01-01T16:52:28.189	157	0	0	0	43	0	0	0	0	0	1	0.06	100	0	44	0	0	0
0	0	0	0	0	0	0	1	0	0	0	269.184	0	0	0	3.4	103.4	0	0	0	-0.095	0	0	43	0	0	0	0	0	0	2019-02-14T01:00:00.000	1970-01-01T16:52:28.189	157	0	0	0	43	0	0	0	0	0	1	0.06	100	0	44	0	0	0
0	0	0	0	0	0	0	1	0	0	0	269.184	0	0	0	3.4	103.4	0	0	0	-0.08	0	0	43	0	0	0	0	0	0	2019-02-14T01:00:00.000	1970-01-01T16:52:28.309	157	0	0	0	43	0	0	0	0	0	1	0.052	100	0	44	0	0	0
0	0	0	0	0	0	0	1	0	0	0	269.184	0	0	0	3.4	103.4	0	0	0	-0.08	0	0	43	0	0	0	0	0	0	2019-02-14T01:00:00.000	1970-01-01T16:52:28.309	157	0	0	0	43	0	0	0	0	0	1	0.052	100	0	44	0	0	0
0	0	0	0	0	0	0	1	0	0	0	269.184	0	0	0	3.4	103.4	0	0	0	-0.08	0	0	43	0	0	0	0	0	0	2019-02-14T01:00:00.000	1970-01-01T16:52:28.309	157	0	0	0	43	0	0	0	0	0	1	0.052	100	0	44	0	0	0
0	0	0	0	0	0	0	1	0	0	0	269.184	0	0	0	3.4	103.4	0	0	0	-0.08	0	0	43	0	0	0	0	0	0	2019-02-14T01:00:00.000	1970-01-01T16:52:28.309	157	0	0	0	43	0	0	0	0	0	1	0.052	100	0	44	0	0	0
0	0	0	0	0	0	0	1	0	0	0	269.184	0	0	0	3.4	103.4	0	0	0	-0.08	0	0	43	0	0	0	0	0	0	2019-02-14T01:00:00.000	1970-01-01T16:52:28.309	157	0	0	0	43	0	0	0	0	0	1	0.052	100	0	44	0	0	0
0	0	0	0	0	0	0	1	0	0	0	269.184	0	0	0	3.4	103.4	0	0	0	-0.07	0	0	43	0	0	0	0	0	0	2019-02-14T01:00:00.000	1970-01-01T16:52:28.429	157	0	0	0	43	0	0	0	0	0	1	0.045	100	0	44	0	0	0
0	0	0	0	0	0	0	1	0	0	0	269.184	0	0	0	3.4	103.4	0	0	0	-0.07	0	0	43	0	0	0	0	0	0	2019-02-14T01:00:00.000	1970-01-01T16:52:28.429	157	0	0	0	43	0	0	0	0	0	1	0.045	100	0	44	0	0	0
0	0	0	0	0	0	0	1	0	0	0	269.184	0	0	0	3.4	103.4	0	0	0	-0.07	0	0	43	0	0	0	0	0	0	2019-02-14T01:00:00.000	1970-01-01T16:52:28.429	157	0	0	0	43	0	0	0	0	0	1	0.045	100	0	44	0	0	0
0	0	0	0	0	0	0	1	0	0	0	269.184	0	0	0	3.4	103.4	0	0	0	-0.07	0	0	43	0	0	0	0	0	0	2019-02-14T01:00:00.000	1970-01-01T16:52:28.429	157	0	0	0	43	0	0	0	0	0	1	0.045	100	0	44	0	0	0
0	0	0	0	0	0	0	1	0	0	0	269.184	0	0	0	3.4	103.4	0	0	0	-0.07	0	0	43	0	0	0	0	0	0	2019-02-14T01:00:00.000	1970-01-01T16:52:28.429	157	0	0	0	43	0	0	0	0	0	1	0.045	100	0	44	0	0	0
0	0	0	0	0	0	0	1	0	0	0	269.184	0	0	0	3.4	103.4	0	0	0	-0.09	0	0	43	0	0	0	0	0	0	2019-02-14T01:00:00.000	1970-01-01T16:52:28.549	157	0	0	0	43	0	0	0	0	0	1	0.045	100	0	44	0	0	0
0	0	0	0	0	0	0	1	0	0	0	269.184	0	0	0	3.4	103.4	0	0	0	-0.09	0	0	43	0	0	0	0	0	0	2019-02-14T01:00:00.000	1970-01-01T16:52:28.549	157	0	0	0	43	0	0	0	0	0	1	0.045	100	0	44	0	0	0
0	0	0	0	0	0	0	1	0	0	0	269.184	0	0	0	3.4	103.4	0	0	0	-0.09	0	0	43	0	0	0	0	0	0	2019-02-14T01:00:00.000	1970-01-01T16:52:28.549	157	0	0	0	43	0	0	0	0	0	1	0.045	100	0	44	0	0	0
0	0	0	0	0	0	0	1	0	0	0	269.184	0	0	0	3.4	103.4	0	0	0	-0.09	0	0	43	0	0	0	0	0	0	2019-02-14T01:00:00.000	1970-01-01T16:52:28.549	157	0	0	0	43	0	0	0	0	0	1	0.045	100	0	44	0	0	0
0	0	0	0	0	0	0	1	0	0	0	269.184	0	0	0	3.4	103.4	0	0	0	-0.09	0	0	43	0	0	0	0	0	0	2019-02-14T01:00:00.000	1970-01-01T16:52:28.549	157	0	0	0	43	0	0	0	0	0	1	0.045	100	0	44	0	0	0
0	0	0	0	0	0	0	1	0	0	0	269.184	0	0	0	3.4	103.4	0	0	0	-0.095	0	0	43	0	0	0	0	0	0	2019-02-14T01:00:00.000	1970-01-01T16:52:28.659	157	0	0	0	43	0	0	0	0	0	1	0.052	100	0	44	0	0	0
0	0	0	0	0	0	0	1	0	0	0	269.184	0	0	0	3.4	103.4	0	0	0	-0.095	0	0	43	0	0	0	0	0	0	2019-02-14T01:00:00.000	1970-01-01T16:52:28.659	157	0	0	0	43	0	0	0	0	0	1	0.052	100	0	44	0	0	0
0	0	0	0	0	0	0	1	0	0	0	269.184	0	0	0	3.4	103.4	0	0	0	-0.095	0	0	43	0	0	0	0	0	0	2019-02-14T01:00:00.000	1970-01-01T16:52:28.659	157	0	0	0	43	0	0	0	0	0	1	0.052	100	0	44	0	0	0
0	0	0	0	0	0	0	1	0	0	0	269.184	0	0	0	3.4	103.4	0	0	0	-0.095	0	0	43	0	0	0	0	0	0	2019-02-14T01:00:00.000	1970-01-01T16:52:28.659	157	0	0	0	43	0	0	0	0	0	1	0.052	100	0	44	0	0	0
0	0	0	0	0	0	0	1	0	0	0	269.184	0	0	0	3.4	103.4	0	0	0	-0.095	0	0	43	0	0	0	0	0	0	2019-02-14T01:00:00.000	1970-01-01T16:52:28.659	157	0	0	0	43	0	0	0	0	0	1	0.052	100	0	44	0	0	0
0	0	0	0	0	0	0	1	0	0	0	269.184	0	0	0	3.4	103.4	0	0	0	-0.08	0	0	43	0	0	0	0	0	0	2019-02-14T01:00:00.000	1970-01-01T16:52:28.779	157	0	0	0	43	0	0	0	0	0	1	0.045	100	0	44	0	0	0
0	0	0	0	0	0	0	1	0	0	0	269.184	0	0	0	3.4	103.4	0	0	0	-0.08	0	0	43	0	0	0	0	0	0	2019-02-14T01:00:00.000	1970-01-01T16:52:28.779	157	0	0	0	43	0	0	0	0	0	1	0.045	100	0	44	0	0	0
0	0	0	0	0	0	0	1	0	0	0	269.184	0	0	0	3.4	103.4	0	0	0	-0.08	0	0	43	0	0	0	0	0	0	2019-02-14T01:00:00.000	1970-01-01T16:52:28.779	157	0	0	0	43	0	0	0	0	0	1	0.045	100	0	44	0	0	0
0	0	0	0	0	0	0	1	0	0	0	269.184	0	0	0	3.4	103.4	0	0	0	-0.08	0	0	43	0	0	0	0	0	0	2019-02-14T01:00:00.000	1970-01-01T16:52:28.779	157	0	0	0	43	0	0	0	0	0	1	0.045	100	0	44	0	0	0
0	0	0	0	0	0	0	1	0	0	0	269.184	0	0	0	3.4	103.4	0	0	0	-0.08	0	0	43	0	0	0	0	0	0	2019-02-14T01:00:00.000	1970-01-01T16:52:28.779	157	0	0	0	43	0	0	0	0	0	1	0.045	100	0	44	0	0	0
0	0	0	0	0	0	0	1	0	0	0	269.184	0	0	0	3.4	103.4	0	0	0	-0.09	0	0	43	0	0	0	0	0	0	2019-02-14T01:00:00.000	1970-01-01T16:52:28.899	157	0	0	0	43	0	0	0	0	0	1	0.045	100	0	44	0	0	0
0	0	0	0	0	0	0	1	0	0	0	269.184	0	0	0	3.4	103.4	0	0	0	-0.09	0	0	43	0	0	0	0	0	0	2019-02-14T01:00:00.000	1970-01-01T16:52:28.899	157	0	0	0	43	0	0	0	0	0	1	0.045	100	0	44	0	0	0
0	0	0	0	0	0	0	1	0	0	0	269.184	0	0	0	3.4	103.4	0	0	0	-0.09	0	0	43	0	0	0	0	0	0	2019-02-14T01:00:00.000	1970-01-01T16:52:28.899	157	0	0	0	43	0	0	0	0	0	1	0.045	100	0	44	0	0	0
0	0	0	0	0	0	0	1	0	0	0	269.184	0	0	0	3.4	103.4	0	0	0	-0.09	0	0	43	0	0	0	0	0	0	2019-02-14T01:00:00.000	1970-01-01T16:52:28.899	157	0	0	0	43	0	0	0	0	0	1	0.045	100	0	44	0	0	0
0	0	0	0	0	0	0	1	0	0	0	269.184	0	0	0	3.4	103.4	0	0	0	-0.09	0	0	43	0	0	0	0	0	0	2019-02-14T01:00:00.000	1970-01-01T16:52:28.899	157	0	0	0	43	0	0	0	0	0	1	0.045	100	0	44	0	0	0
0	0	0	0	0	0	0	1	0	0	0	269.184	0	0	0	3.4	103.4	0	0	0	-0.085	0	0	43	0	0	0	0	0	0	2019-02-14T01:00:00.000	1970-01-01T16:52:29.019	157	0	0	0	43	0	0	0	0	0	1	0.045	100	0	44	0	0	0
0	0	0	0	0	0	0	1	0	0	0	269.184	0	0	0	3.4	103.4	0	0	0	-0.085	0	0	43	0	0	0	0	0	0	2019-02-14T01:00:00.000	1970-01-01T16:52:29.019	157	0	0	0	43	0	0	0	0	0	1	0.045	100	0	44	0	0	0
0	0	0	0	0	0	0	1	0	0	0	269.184	0	0	0	3.4	103.4	0	0	0	-0.085	0	0	43	0	0	0	0	0	0	2019-02-14T01:00:00.000	1970-01-01T16:52:29.019	157	0	0	0	43	0	0	0	0	0	1	0.045	100	0	44	0	0	0
0	0	0	0	0	0	0	1	0	0	0	269.184	0	0	0	3.4	103.4	0	0	0	-0.085	0	0	43	0	0	0	0	0	0	2019-02-14T01:00:00.000	1970-01-01T16:52:29.019	157	0	0	0	43	0	0	0	0	0	1	0.045	100	0	44	0	0	0
0	0	0	0	0	0	0	1	0	0	0	269.184	0	0	0	3.4	103.4	0	0	0	-0.085	0	0	43	0	0	0	0	0	0	2019-02-14T01:00:00.000	1970-01-01T16:52:29.019	157	0	0	0	43	0	0	0	0	0	1	0.045	100	0	44	0	0	0
0	0	0	0	0	0	0	1	0	0	0	269.184	0	0	0	3.4	103.4	0	0	0	-0.1	0	0	43	0	0	0	0	0	0	2019-02-14T01:00:00.000	1970-01-01T16:52:29.129	157	0	0	0	43	0	0	0	0	0	1	0.037	100	0	44	0	0	0
0	0	0	0	0	0	0	1	0	0	0	269.184	0	0	0	3.4	103.4	0	0	0	-0.1	0	0	43	0	0	0	0	0	0	2019-02-14T01:00:00.000	1970-01-01T16:52:29.129	157	0	0	0	43	0	0	0	0	0	1	0.037	100	0	44	0	0	0
0	0	0	0	0	0	0	1	0	0	0	269.184	0	0	0	3.4	103.4	0	0	0	-0.09	0	0	43	0	0	0	0	0	0	2019-02-14T01:00:00.000	1970-01-01T16:52:29.389	157	0	0	0	43	0	0	0	0	0	1	0.052	100	0	44	0	0	0
0	0	0	0	0	0	0	1	0	0	0	269.184	0	0	0	3.4	103.4	0	0	0	-0.09	0	0	43	0	0	0	0	0	0	2019-02-14T01:00:00.000	1970-01-01T16:52:29.389	157	0	0	0	43	0	0	0	0	0	1	0.052	100	0	44	0	0	0
0	0	0	0	0	0	0	1	0	0	0	269.184	0	0	0	3.4	103.4	0	0	0	-0.09	0	0	43	0	0	0	0	0	0	2019-02-14T01:00:00.000	1970-01-01T16:52:29.389	157	0	0	0	43	0	0	0	0	0	1	0.052	100	0	44	0	0	0
0	0	0	0	0	0	0	1	0	0	0	269.184	0	0	0	3.4	103.4	0	0	0	-0.09	0	0	43	0	0	0	0	0	0	2019-02-14T01:00:00.000	1970-01-01T16:52:29.389	157	0	0	0	43	0	0	0	0	0	1	0.052	100	0	44	0	0	0
0	0	0	0	0	0	0	1	0	0	0	269.184	0	0	0	3.4	103.4	0	0	0	-0.09	0	0	43	0	0	0	0	0	0	2019-02-14T01:00:00.000	1970-01-01T16:52:29.389	157	0	0	0	43	0	0	0	0	0	1	0.052	100	0	44	0	0	0
0	0	0	0	0	0	0	1	0	0	0	269.184	0	0	0	3.4	103.4	0	0	0	-0.095	0	0	43	0	0	0	0	0	0	2019-02-14T01:00:00.000	1970-01-01T16:52:29.509	157	0	0	0	43	0	0	0	0	0	1	0.045	100	0	44	0	0	0
0	0	0	0	0	0	0	1	0	0	0	269.184	0	0	0	3.4	103.4	0	0	0	-0.095	0	0	43	0	0	0	0	0	0	2019-02-14T01:00:00.000	1970-01-01T16:52:29.509	157	0	0	0	43	0	0	0	0	0	1	0.045	100	0	44	0	0	0
0	0	0	0	0	0	0	1	0	0	0	269.184	0	0	0	3.4	103.4	0	0	0	-0.095	0	0	43	0	0	0	0	0	0	2019-02-14T01:00:00.000	1970-01-01T16:52:29.509	157	0	0	0	43	0	0	0	0	0	1	0.045	100	0	44	0	0	0
0	0	0	0	0	0	0	1	0	0	0	269.184	0	0	0	3.4	103.4	0	0	0	-0.095	0	0	43	0	0	0	0	0	0	2019-02-14T01:00:00.000	1970-01-01T16:52:29.509	157	0	0	0	43	0	0	0	0	0	1	0.045	100	0	44	0	0	0
0	0	0	0	0	0	0	1	0	0	0	269.184	0	0	0	3.4	103.4	0	0	0	-0.095	0	0	43	0	0	0	0	0	0	2019-02-14T01:00:00.000	1970-01-01T16:52:29.509	157	0	0	0	43	0	0	0	0	0	1	0.045	100	0	44	0	0	0
0	0	0	0	0	0	0	1	0	0	0	269.184	0	0	0	3.4	103.4	0	0	0	-0.08	0	0	43	0	0	0	0	0	0	2019-02-14T01:00:00.000	1970-01-01T16:52:29.629	157	0	0	0	43	0	0	0	0	0	1	0.037	100	0	44	0	0	0
0	0	0	0	0	0	0	1	0	0	0	269.184	0	0	0	3.4	103.4	0	0	0	-0.08	0	0	43	0	0	0	0	0	0	2019-02-14T01:00:00.000	1970-01-01T16:52:29.629	157	0	0	0	43	0	0	0	0	0	1	0.037	100	0	44	0	0	0
0	0	0	0	0	0	0	1	0	0	0	269.184	0	0	0	3.4	103.4	0	0	0	-0.08	0	0	43	0	0	0	0	0	0	2019-02-14T01:00:00.000	1970-01-01T16:52:29.629	157	0	0	0	43	0	0	0	0	0	1	0.037	100	0	44	0	0	0
0	0	0	0	0	0	0	1	0	0	0	269.184	0	0	0	3.4	103.4	0	0	0	-0.08	0	0	43	0	0	0	0	0	0	2019-02-14T01:00:00.000	1970-01-01T16:52:29.629	157	0	0	0	43	0	0	0	0	0	1	0.037	100	0	44	0	0	0
0	0	0	0	0	0	0	1	0	0	0	269.184	0	0	0	3.4	103.4	0	0	0	-0.08	0	0	43	0	0	0	0	0	0	2019-02-14T01:00:00.000	1970-01-01T16:52:29.629	157	0	0	0	43	0	0	0	0	0	1	0.037	100	0	44	0	0	0
0	0	0	0	0	0	0	1	0	0	0	269.184	0	0	0	3.4	103.4	0	0	0	-0.08	0	0	43	0	0	0	0	0	0	2019-02-14T01:00:00.000	1970-01-01T16:52:29.739	157	0	0	0	43	0	0	0	0	0	1	0.037	100	0	44	0	0	0
0	0	0	0	0	0	0	1	0	0	0	269.184	0	0	0	3.4	103.4	0	0	0	-0.08	0	0	43	0	0	0	0	0	0	2019-02-14T01:00:00.000	1970-01-01T16:52:29.739	157	0	0	0	43	0	0	0	0	0	1	0.037	100	0	44	0	0	0
0	0	0	0	0	0	0	1	0	0	0	269.184	0	0	0	3.4	103.4	0	0	0	-0.08	0	0	43	0	0	0	0	0	0	2019-02-14T01:00:00.000	1970-01-01T16:52:29.739	157	0	0	0	43	0	0	0	0	0	1	0.037	100	0	44	0	0	0
0	0	0	0	0	0	0	1	0	0	0	269.184	0	0	0	3.4	103.4	0	0	0	-0.08	0	0	43	0	0	0	0	0	0	2019-02-14T01:00:00.000	1970-01-01T16:52:29.739	157	0	0	0	43	0	0	0	0	0	1	0.037	100	0	44	0	0	0
0	0	0	0	0	0	0	1	0	0	0	269.184	0	0	0	3.4	103.4	0	0	0	-0.08	0	0	43	0	0	0	0	0	0	2019-02-14T01:00:00.000	1970-01-01T16:52:29.739	157	0	0	0	43	0	0	0	0	0	1	0.037	100	0	44	0	0	0
0	0	0	0	0	0	0	1	0	0	0	269.184	0	0	0	3.4	103.4	0	0	0	-0.075	0	0	43	0	0	0	0	0	0	2019-02-14T01:00:00.000	1970-01-01T16:52:29.859	157	0	0	0	43	0	0	0	0	0	1	0.052	100	0	44	0	0	0
0	0	0	0	0	0	0	1	0	0	0	269.184	0	0	0	3.4	103.4	0	0	0	-0.075	0	0	43	0	0	0	0	0	0	2019-02-14T01:00:00.000	1970-01-01T16:52:29.859	157	0	0	0	43	0	0	0	0	0	1	0.052	100	0	44	0	0	0
0	0	0	0	0	0	0	1	0	0	0	269.184	0	0	0	3.4	103.4	0	0	0	-0.075	0	0	43	0	0	0	0	0	0	2019-02-14T01:00:00.000	1970-01-01T16:52:29.859	157	0	0	0	43	0	0	0	0	0	1	0.052	100	0	44	0	0	0
0	0	0	0	0	0	0	1	0	0	0	269.184	0	0	0	3.4	103.4	0	0	0	-0.075	0	0	43	0	0	0	0	0	0	2019-02-14T01:00:00.000	1970-01-01T16:52:29.859	157	0	0	0	43	0	0	0	0	0	1	0.052	100	0	44	0	0	0
0	0	0	0	0	0	0	1	0	0	0	269.184	0	0	0	3.4	103.4	0	0	0	-0.075	0	0	43	0	0	0	0	0	0	2019-02-14T01:00:00.000	1970-01-01T16:52:29.859	157	0	0	0	43	0	0	0	0	0	1	0.052	100	0	44	0	0	0
0	0	0	0	0	0	0	1	0	0	0	269.184	0	0	0	3.4	103.4	0	0	0	-0.085	0	0	43	0	0	0	0	0	0	2019-02-14T01:00:00.000	1970-01-01T16:52:29.979	157	0	0	0	43	0	0	0	0	0	1	0.045	100	0	44	0	0	0
0	0	0	0	0	0	0	1	0	0	0	269.184	0	0	0	3.4	103.4	0	0	0	-0.085	0	0	43	0	0	0	0	0	0	2019-02-14T01:00:00.000	1970-01-01T16:52:29.979	157	0	0	0	43	0	0	0	0	0	1	0.045	100	0	44	0	0	0
0	0	0	0	0	0	0	1	0	0	0	269.184	0	0	0	3.4	103.4	0	0	0	-0.085	0	0	43	0	0	0	0	0	0	2019-02-14T01:00:00.000	1970-01-01T16:52:29.979	157	0	0	0	43	0	0	0	0	0	1	0.045	100	0	44	0	0	0
0	0	0	0	0	0	0	1	0	0	0	269.184	0	0	0	3.4	103.4	0	0	0	-0.085	0	0	43	0	0	0	0	0	0	2019-02-14T01:00:00.000	1970-01-01T16:52:29.979	157	0	0	0	43	0	0	0	0	0	1	0.045	100	0	44	0	0	0
0	0	0	0	0	0	0	1	0	0	0	269.184	0	0	0	3.4	103.4	0	0	0	-0.085	0	0	43	0	0	0	0	0	0	2019-02-14T01:00:00.000	1970-01-01T16:52:29.979	157	0	0	0	43	0	0	0	0	0	1	0.045	100	0	44	0	0	0
0	0	0	0	0	0	0	1	0	0	0	269.184	0	0	0	3.4	103.4	0	0	0	-0.08	0	0	43	0	0	0	0	0	0	2019-02-14T01:00:00.000	1970-01-01T16:52:30.089	157	0	0	0	43	0	0	0	0	0	1	0.03	100	0	44	0	0	0
0	0	0	0	0	0	0	1	0	0	0	269.184	0	0	0	3.4	103.4	0	0	0	-0.08	0	0	43	0	0	0	0	0	0	2019-02-14T01:00:00.000	1970-01-01T16:52:30.089	157	0	0	0	43	0	0	0	0	0	1	0.03	100	0	44	0	0	0
0	0	0	0	0	0	0	1	0	0	0	269.184	0	0	0	3.4	103.4	0	0	0	-0.08	0	0	43	0	0	0	0	0	0	2019-02-14T01:00:00.000	1970-01-01T16:52:30.089	157	0	0	0	43	0	0	0	0	0	1	0.03	100	0	44	0	0	0
0	0	0	0	0	0	0	1	0	0	0	269.184	0	0	0	3.4	103.4	0	0	0	-0.08	0	0	43	0	0	0	0	0	0	2019-02-14T01:00:00.000	1970-01-01T16:52:30.089	157	0	0	0	43	0	0	0	0	0	1	0.03	100	0	44	0	0	0
0	0	0	0	0	0	0	1	0	0	0	269.184	0	0	0	3.4	103.4	0	0	0	-0.08	0	0	43	0	0	0	0	0	0	2019-02-14T01:00:00.000	1970-01-01T16:52:30.089	157	0	0	0	43	0	0	0	0	0	1	0.03	100	0	44	0	0	0
0	0	0	0	0	0	0	1	0	0	0	269.184	0	0	0	3.4	103.4	0	0	0	-0.085	0	0	43	0	0	0	0	0	0	2019-02-14T01:00:00.000	1970-01-01T16:52:30.209	157	0	0	0	43	0	0	0	0	0	1	0.037	100	0	44	0	0	0
0	0	0	0	0	0	0	1	0	0	0	269.184	0	0	0	3.4	103.4	0	0	0	-0.085	0	0	43	0	0	0	0	0	0	2019-02-14T01:00:00.000	1970-01-01T16:52:30.209	157	0	0	0	43	0	0	0	0	0	1	0.037	100	0	44	0	0	0
0	0	0	0	0	0	0	1	0	0	0	269.184	0	0	0	3.4	103.4	0	0	0	-0.085	0	0	43	0	0	0	0	0	0	2019-02-14T01:00:00.000	1970-01-01T16:52:30.209	157	0	0	0	43	0	0	0	0	0	1	0.037	100	0	44	0	0	0
0	0	0	0	0	0	0	1	0	0	0	269.184	0	0	0	3.4	103.4	0	0	0	-0.085	0	0	43	0	0	0	0	0	0	2019-02-14T01:00:00.000	1970-01-01T16:52:30.209	157	0	0	0	43	0	0	0	0	0	1	0.037	100	0	44	0	0	0
0	0	0	0	0	0	0	1	0	0	0	269.184	0	0	0	3.4	103.4	0	0	0	-0.085	0	0	43	0	0	0	0	0	0	2019-02-14T01:00:00.000	1970-01-01T16:52:30.209	157	0	0	0	43	0	0	0	0	0	1	0.037	100	0	44	0	0	0
0	0	0	0	0	0	0	1	0	0	0	269.184	0	0	0	3.4	103.4	0	0	0	-0.095	0	0	43	0	0	0	0	0	0	2019-02-14T01:00:00.000	1970-01-01T16:52:30.329	157	0	0	0	43	0	0	0	0	0	1	0.045	100	0	44	0	0	0
0	0	0	0	0	0	0	1	0	0	0	269.184	0	0	0	3.4	103.4	0	0	0	-0.095	0	0	43	0	0	0	0	0	0	2019-02-14T01:00:00.000	1970-01-01T16:52:30.329	157	0	0	0	43	0	0	0	0	0	1	0.045	100	0	44	0	0	0
0	0	0	0	0	0	0	1	0	0	0	269.184	0	0	0	3.4	103.4	0	0	0	-0.095	0	0	43	0	0	0	0	0	0	2019-02-14T01:00:00.000	1970-01-01T16:52:30.329	157	0	0	0	43	0	0	0	0	0	1	0.045	100	0	44	0	0	0
0	0	0	0	0	0	0	1	0	0	0	269.184	0	0	0	3.4	103.4	0	0	0	-0.095	0	0	43	0	0	0	0	0	0	2019-02-14T01:00:00.000	1970-01-01T16:52:30.329	157	0	0	0	43	0	0	0	0	0	1	0.045	100	0	44	0	0	0
0	0	0	0	0	0	0	1	0	0	0	269.184	0	0	0	3.4	103.4	0	0	0	-0.095	0	0	43	0	0	0	0	0	0	2019-02-14T01:00:00.000	1970-01-01T16:52:30.329	157	0	0	0	43	0	0	0	0	0	1	0.045	100	0	44	0	0	0
0	0	0	0	0	0	0	1	0	0	0	269.184	0	0	0	3.4	103.4	0	0	0	-0.08	0	0	43	0	0	0	0	0	0	2019-02-14T01:00:00.000	1970-01-01T16:52:30.439	157	0	0	0	43	0	0	0	0	0	1	0.037	100	0	44	0	0	0
0	0	0	0	0	0	0	1	0	0	0	269.184	0	0	0	3.4	103.4	0	0	0	-0.08	0	0	43	0	0	0	0	0	0	2019-02-14T01:00:00.000	1970-01-01T16:52:30.439	157	0	0	0	43	0	0	0	0	0	1	0.037	100	0	44	0	0	0
0	0	0	0	0	0	0	1	0	0	0	269.184	0	0	0	3.4	103.4	0	0	0	-0.08	0	0	43	0	0	0	0	0	0	2019-02-14T01:00:00.000	1970-01-01T16:52:30.439	157	0	0	0	43	0	0	0	0	0	1	0.037	100	0	44	0	0	0
0	0	0	0	0	0	0	1	0	0	0	269.184	0	0	0	3.4	103.4	0	0	0	-0.08	0	0	43	0	0	0	0	0	0	2019-02-14T01:00:00.000	1970-01-01T16:52:30.439	157	0	0	0	43	0	0	0	0	0	1	0.037	100	0	44	0	0	0
0	0	0	0	0	0	0	1	0	0	0	269.184	0	0	0	3.4	103.4	0	0	0	-0.08	0	0	43	0	0	0	0	0	0	2019-02-14T01:00:00.000	1970-01-01T16:52:30.439	157	0	0	0	43	0	0	0	0	0	1	0.037	100	0	44	0	0	0
0	0	0	0	0	0	0	1	0	0	0	269.184	0	0	0	3.4	103.4	0	0	0	-0.085	0	0	43	0	0	0	0	0	0	2019-02-14T01:00:00.000	1970-01-01T16:52:30.559	157	0	0	0	43	0	0	0	0	0	1	0.045	100	0	44	0	0	0
0	0	0	0	0	0	0	1	0	0	0	269.184	0	0	0	3.4	103.4	0	0	0	-0.085	0	0	43	0	0	0	0	0	0	2019-02-14T01:00:00.000	1970-01-01T16:52:30.559	157	0	0	0	43	0	0	0	0	0	1	0.045	100	0	44	0	0	0
0	0	0	0	0	0	0	1	0	0	0	269.184	0	0	0	3.4	103.4	0	0	0	-0.085	0	0	43	0	0	0	0	0	0	2019-02-14T01:00:00.000	1970-01-01T16:52:30.559	157	0	0	0	43	0	0	0	0	0	1	0.045	100	0	44	0	0	0
0	0	0	0	0	0	0	1	0	0	0	269.184	0	0	0	3.4	103.4	0	0	0	-0.085	0	0	43	0	0	0	0	0	0	2019-02-14T01:00:00.000	1970-01-01T16:52:30.559	157	0	0	0	43	0	0	0	0	0	1	0.045	100	0	44	0	0	0
0	0	0	0	0	0	0	1	0	0	0	269.184	0	0	0	3.4	103.4	0	0	0	-0.085	0	0	43	0	0	0	0	0	0	2019-02-14T01:00:00.000	1970-01-01T16:52:30.559	157	0	0	0	43	0	0	0	0	0	1	0.045	100	0	44	0	0	0
0	0	0	0	0	0	0	1	0	0	0	269.184	0	0	0	3.4	103.4	0	0	0	-0.09	0	0	43	0	0	0	0	0	0	2019-02-14T01:00:00.000	1970-01-01T16:52:30.679	157	0	0	0	43	0	0	0	0	0	1	0.052	100	0	44	0	0	0
0	0	0	0	0	0	0	1	0	0	0	269.184	0	0	0	3.4	103.4	0	0	0	-0.09	0	0	43	0	0	0	0	0	0	2019-02-14T01:00:00.000	1970-01-01T16:52:30.679	157	0	0	0	43	0	0	0	0	0	1	0.052	100	0	44	0	0	0
0	0	0	0	0	0	0	1	0	0	0	269.184	0	0	0	3.4	103.4	0	0	0	-0.09	0	0	43	0	0	0	0	0	0	2019-02-14T01:00:00.000	1970-01-01T16:52:30.679	157	0	0	0	43	0	0	0	0	0	1	0.052	100	0	44	0	0	0
0	0	0	0	0	0	0	1	0	0	0	269.184	0	0	0	3.4	103.4	0	0	0	-0.085	0	0	43	0	0	0	0	0	0	2019-02-14T01:00:00.000	1970-01-01T16:52:30.959	157	0	0	0	43	0	0	0	0	0	1	0.037	100	0	44	0	0	0
0	0	0	0	0	0	0	1	0	0	0	269.184	0	0	0	3.4	103.4	0	0	0	-0.085	0	0	43	0	0	0	0	0	0	2019-02-14T01:00:00.000	1970-01-01T16:52:30.959	157	0	0	0	43	0	0	0	0	0	1	0.037	100	0	44	0	0	0
0	0	0	0	0	0	0	1	0	0	0	269.184	0	0	0	3.4	103.4	0	0	0	-0.085	0	0	43	0	0	0	0	0	0	2019-02-14T01:00:00.000	1970-01-01T16:52:30.959	157	0	0	0	43	0	0	0	0	0	1	0.037	100	0	44	0	0	0
0	0	0	0	0	0	0	1	0	0	0	269.184	0	0	0	3.4	103.4	0	0	0	-0.085	0	0	43	0	0	0	0	0	0	2019-02-14T01:00:00.000	1970-01-01T16:52:30.959	157	0	0	0	43	0	0	0	0	0	1	0.037	100	0	44	0	0	0
0	0	0	0	0	0	0	1	0	0	0	269.184	0	0	0	3.4	103.4	0	0	0	-0.085	0	0	43	0	0	0	0	0	0	2019-02-14T01:00:00.000	1970-01-01T16:52:30.959	157	0	0	0	43	0	0	0	0	0	1	0.037	100	0	44	0	0	0
0	0	0	0	0	0	0	1	0	0	0	269.184	0	0	0	3.4	103.4	0	0	0	-0.085	0	0	43	0	0	0	0	0	0	2019-02-14T01:00:00.000	1970-01-01T16:52:31.079	157	0	0	0	43	0	0	0	0	0	1	0.037	100	0	44	0	0	0
0	0	0	0	0	0	0	1	0	0	0	269.184	0	0	0	3.4	103.4	0	0	0	-0.085	0	0	43	0	0	0	0	0	0	2019-02-14T01:00:00.000	1970-01-01T16:52:31.079	157	0	0	0	43	0	0	0	0	0	1	0.037	100	0	44	0	0	0
0	0	0	0	0	0	0	1	0	0	0	269.184	0	0	0	3.4	103.4	0	0	0	-0.085	0	0	43	0	0	0	0	0	0	2019-02-14T01:00:00.000	1970-01-01T16:52:31.079	157	0	0	0	43	0	0	0	0	0	1	0.037	100	0	44	0	0	0
0	0	0	0	0	0	0	1	0	0	0	269.184	0	0	0	3.4	103.4	0	0	0	-0.085	0	0	43	0	0	0	0	0	0	2019-02-14T01:00:00.000	1970-01-01T16:52:31.079	157	0	0	0	43	0	0	0	0	0	1	0.037	100	0	44	0	0	0
0	0	0	0	0	0	0	1	0	0	0	269.184	0	0	0	3.4	103.4	0	0	0	-0.085	0	0	43	0	0	0	0	0	0	2019-02-14T01:00:00.000	1970-01-01T16:52:31.079	157	0	0	0	43	0	0	0	0	0	1	0.037	100	0	44	0	0	0
0	0	0	0	0	0	0	1	0	0	0	269.184	0	0	0	3.4	103.4	0	0	0	-0.09	0	0	43	0	0	0	0	0	0	2019-02-14T01:00:00.000	1970-01-01T16:52:31.199	157	0	0	0	43	0	0	0	0	0	1	0.045	100	0	44	0	0	0
0	0	0	0	0	0	0	1	0	0	0	269.184	0	0	0	3.4	103.4	0	0	0	-0.09	0	0	43	0	0	0	0	0	0	2019-02-14T01:00:00.000	1970-01-01T16:52:31.199	157	0	0	0	43	0	0	0	0	0	1	0.045	100	0	44	0	0	0
0	0	0	0	0	0	0	1	0	0	0	269.184	0	0	0	3.4	103.4	0	0	0	-0.09	0	0	43	0	0	0	0	0	0	2019-02-14T01:00:00.000	1970-01-01T16:52:31.199	157	0	0	0	43	0	0	0	0	0	1	0.045	100	0	44	0	0	0
0	0	0	0	0	0	0	1	0	0	0	269.184	0	0	0	3.4	103.4	0	0	0	-0.09	0	0	43	0	0	0	0	0	0	2019-02-14T01:00:00.000	1970-01-01T16:52:31.199	157	0	0	0	43	0	0	0	0	0	1	0.045	100	0	44	0	0	0
0	0	0	0	0	0	0	1	0	0	0	269.184	0	0	0	3.4	103.4	0	0	0	-0.09	0	0	43	0	0	0	0	0	0	2019-02-14T01:00:00.000	1970-01-01T16:52:31.199	157	0	0	0	43	0	0	0	0	0	1	0.045	100	0	44	0	0	0
0	0	0	0	0	0	0	1	0	0	0	269.184	0	0	0	3.4	103.4	0	0	0	-0.09	0	0	43	0	0	0	0	0	0	2019-02-14T01:00:00.000	1970-01-01T16:52:31.309	157	0	0	0	43	0	0	0	0	0	1	0.03	100	0	44	0	0	0
0	0	0	0	0	0	0	1	0	0	0	269.184	0	0	0	3.4	103.4	0	0	0	-0.09	0	0	43	0	0	0	0	0	0	2019-02-14T01:00:00.000	1970-01-01T16:52:31.309	157	0	0	0	43	0	0	0	0	0	1	0.03	100	0	44	0	0	0
0	0	0	0	0	0	0	1	0	0	0	269.184	0	0	0	3.4	103.4	0	0	0	-0.09	0	0	43	0	0	0	0	0	0	2019-02-14T01:00:00.000	1970-01-01T16:52:31.309	157	0	0	0	43	0	0	0	0	0	1	0.03	100	0	44	0	0	0
0	0	0	0	0	0	0	1	0	0	0	269.184	0	0	0	3.4	103.4	0	0	0	-0.09	0	0	43	0	0	0	0	0	0	2019-02-14T01:00:00.000	1970-01-01T16:52:31.309	157	0	0	0	43	0	0	0	0	0	1	0.03	100	0	44	0	0	0
0	0	0	0	0	0	0	1	0	0	0	269.184	0	0	0	3.4	103.4	0	0	0	-0.09	0	0	43	0	0	0	0	0	0	2019-02-14T01:00:00.000	1970-01-01T16:52:31.309	157	0	0	0	43	0	0	0	0	0	1	0.03	100	0	44	0	0	0
0	0	0	0	0	0	0	1	0	0	0	269.184	0	0	0	3.4	103.4	0	0	0	-0.085	0	0	43	0	0	0	0	0	0	2019-02-14T01:00:00.000	1970-01-01T16:52:31.429	157	0	0	0	43	0	0	0	0	0	1	0.045	100	0	44	0	0	0
0	0	0	0	0	0	0	1	0	0	0	269.184	0	0	0	3.4	103.4	0	0	0	-0.085	0	0	43	0	0	0	0	0	0	2019-02-14T01:00:00.000	1970-01-01T16:52:31.429	157	0	0	0	43	0	0	0	0	0	1	0.045	100	0	44	0	0	0
0	0	0	0	0	0	0	1	0	0	0	269.184	0	0	0	3.4	103.4	0	0	0	-0.085	0	0	43	0	0	0	0	0	0	2019-02-14T01:00:00.000	1970-01-01T16:52:31.429	157	0	0	0	43	0	0	0	0	0	1	0.045	100	0	44	0	0	0
0	0	0	0	0	0	0	1	0	0	0	269.184	0	0	0	3.4	103.4	0	0	0	-0.085	0	0	43	0	0	0	0	0	0	2019-02-14T01:00:00.000	1970-01-01T16:52:31.429	157	0	0	0	43	0	0	0	0	0	1	0.045	100	0	44	0	0	0
0	0	0	0	0	0	0	1	0	0	0	269.184	0	0	0	3.4	103.4	0	0	0	-0.085	0	0	43	0	0	0	0	0	0	2019-02-14T01:00:00.000	1970-01-01T16:52:31.429	157	0	0	0	43	0	0	0	0	0	1	0.045	100	0	44	0	0	0
0	0	0	0	0	0	0	1	0	0	0	269.184	0	0	0	3.4	103.4	0	0	0	-0.08	0	0	43	0	0	0	0	0	0	2019-02-14T01:00:00.000	1970-01-01T16:52:31.549	157	0	0	0	43	0	0	0	0	0	1	0.045	100	0	44	0	0	0
0	0	0	0	0	0	0	1	0	0	0	269.184	0	0	0	3.4	103.4	0	0	0	-0.08	0	0	43	0	0	0	0	0	0	2019-02-14T01:00:00.000	1970-01-01T16:52:31.549	157	0	0	0	43	0	0	0	0	0	1	0.045	100	0	44	0	0	0
0	0	0	0	0	0	0	1	0	0	0	269.184	0	0	0	3.4	103.4	0	0	0	-0.08	0	0	43	0	0	0	0	0	0	2019-02-14T01:00:00.000	1970-01-01T16:52:31.549	157	0	0	0	43	0	0	0	0	0	1	0.045	100	0	44	0	0	0
0	0	0	0	0	0	0	1	0	0	0	269.184	0	0	0	3.4	103.4	0	0	0	-0.08	0	0	43	0	0	0	0	0	0	2019-02-14T01:00:00.000	1970-01-01T16:52:31.549	157	0	0	0	43	0	0	0	0	0	1	0.045	100	0	44	0	0	0
0	0	0	0	0	0	0	1	0	0	0	269.184	0	0	0	3.4	103.4	0	0	0	-0.08	0	0	43	0	0	0	0	0	0	2019-02-14T01:00:00.000	1970-01-01T16:52:31.549	157	0	0	0	43	0	0	0	0	0	1	0.045	100	0	44	0	0	0
0	0	0	0	0	0	0	1	0	0	0	269.184	0	0	0	3.4	103.4	0	0	0	-0.09	0	0	43	0	0	0	0	0	0	2019-02-14T01:00:00.000	1970-01-01T16:52:31.669	157	0	0	0	43	0	0	0	0	0	1	0.037	100	0	44	0	0	0
0	0	0	0	0	0	0	1	0	0	0	269.184	0	0	0	3.4	103.4	0	0	0	-0.09	0	0	43	0	0	0	0	0	0	2019-02-14T01:00:00.000	1970-01-01T16:52:31.669	157	0	0	0	43	0	0	0	0	0	1	0.037	100	0	44	0	0	0
0	0	0	0	0	0	0	1	0	0	0	269.184	0	0	0	3.4	103.4	0	0	0	-0.09	0	0	43	0	0	0	0	0	0	2019-02-14T01:00:00.000	1970-01-01T16:52:31.669	157	0	0	0	43	0	0	0	0	0	1	0.037	100	0	44	0	0	0
0	0	0	0	0	0	0	1	0	0	0	269.184	0	0	0	3.4	103.4	0	0	0	-0.09	0	0	43	0	0	0	0	0	0	2019-02-14T01:00:00.000	1970-01-01T16:52:31.669	157	0	0	0	43	0	0	0	0	0	1	0.037	100	0	44	0	0	0
0	0	0	0	0	0	0	1	0	0	0	269.184	0	0	0	3.4	103.4	0	0	0	-0.09	0	0	43	0	0	0	0	0	0	2019-02-14T01:00:00.000	1970-01-01T16:52:31.669	157	0	0	0	43	0	0	0	0	0	1	0.037	100	0	44	0	0	0
0	0	0	0	0	0	0	1	0	0	0	269.184	0	0	0	3.4	103.4	0	0	0	-0.09	0	0	43	0	0	0	0	0	0	2019-02-14T01:00:00.000	1970-01-01T16:52:31.779	157	0	0	0	43	0	0	0	0	0	1	0.022	100	0	44	0	0	0
0	0	0	0	0	0	0	1	0	0	0	269.184	0	0	0	3.4	103.4	0	0	0	-0.09	0	0	43	0	0	0	0	0	0	2019-02-14T01:00:00.000	1970-01-01T16:52:31.779	157	0	0	0	43	0	0	0	0	0	1	0.022	100	0	44	0	0	0
0	0	0	0	0	0	0	1	0	0	0	269.184	0	0	0	3.4	103.4	0	0	0	-0.09	0	0	43	0	0	0	0	0	0	2019-02-14T01:00:00.000	1970-01-01T16:52:31.779	157	0	0	0	43	0	0	0	0	0	1	0.022	100	0	44	0	0	0
0	0	0	0	0	0	0	1	0	0	0	269.184	0	0	0	3.4	103.4	0	0	0	-0.09	0	0	43	0	0	0	0	0	0	2019-02-14T01:00:00.000	1970-01-01T16:52:31.779	157	0	0	0	43	0	0	0	0	0	1	0.022	100	0	44	0	0	0
0	0	0	0	0	0	0	1	0	0	0	269.184	0	0	0	3.4	103.4	0	0	0	-0.09	0	0	43	0	0	0	0	0	0	2019-02-14T01:00:00.000	1970-01-01T16:52:31.779	157	0	0	0	43	0	0	0	0	0	1	0.022	100	0	44	0	0	0
0	0	0	0	0	0	0	1	0	0	0	269.184	0	0	0	3.4	103.4	0	0	0	-0.085	0	0	43	0	0	0	0	0	0	2019-02-14T01:00:00.000	1970-01-01T16:52:31.899	157	0	0	0	43	0	0	0	0	0	1	0.045	100	0	44	0	0	0
0	0	0	0	0	0	0	1	0	0	0	269.184	0	0	0	3.4	103.4	0	0	0	-0.085	0	0	43	0	0	0	0	0	0	2019-02-14T01:00:00.000	1970-01-01T16:52:31.899	157	0	0	0	43	0	0	0	0	0	1	0.045	100	0	44	0	0	0
0	0	0	0	0	0	0	1	0	0	0	269.184	0	0	0	3.4	103.4	0	0	0	-0.085	0	0	43	0	0	0	0	0	0	2019-02-14T01:00:00.000	1970-01-01T16:52:31.899	157	0	0	0	43	0	0	0	0	0	1	0.045	100	0	44	0	0	0
0	0	0	0	0	0	0	1	0	0	0	269.184	0	0	0	3.4	103.4	0	0	0	-0.085	0	0	43	0	0	0	0	0	0	2019-02-14T01:00:00.000	1970-01-01T16:52:31.899	157	0	0	0	43	0	0	0	0	0	1	0.045	100	0	44	0	0	0
0	0	0	0	0	0	0	1	0	0	0	269.184	0	0	0	3.4	103.4	0	0	0	-0.085	0	0	43	0	0	0	0	0	0	2019-02-14T01:00:00.000	1970-01-01T16:52:31.899	157	0	0	0	43	0	0	0	0	0	1	0.045	100	0	44	0	0	0
0	0	0	0	0	0	0	1	0	0	0	269.184	0	0	0	3.4	103.4	0	0	0	-0.09	0	0	43	0	0	0	0	0	0	2019-02-14T01:00:00.000	1970-01-01T16:52:32.019	157	0	0	0	43	0	0	0	0	0	1	0.037	100	0	44	0	0	0
0	0	0	0	0	0	0	1	0	0	0	269.184	0	0	0	3.4	103.4	0	0	0	-0.09	0	0	43	0	0	0	0	0	0	2019-02-14T01:00:00.000	1970-01-01T16:52:32.019	157	0	0	0	43	0	0	0	0	0	1	0.037	100	0	44	0	0	0
0	0	0	0	0	0	0	1	0	0	0	269.184	0	0	0	3.4	103.4	0	0	0	-0.09	0	0	43	0	0	0	0	0	0	2019-02-14T01:00:00.000	1970-01-01T16:52:32.019	157	0	0	0	43	0	0	0	0	0	1	0.037	100	0	44	0	0	0
0	0	0	0	0	0	0	1	0	0	0	269.184	0	0	0	3.4	103.4	0	0	0	-0.09	0	0	43	0	0	0	0	0	0	2019-02-14T01:00:00.000	1970-01-01T16:52:32.019	157	0	0	0	43	0	0	0	0	0	1	0.037	100	0	44	0	0	0
0	0	0	0	0	0	0	1	0	0	0	269.184	0	0	0	3.4	103.4	0	0	0	-0.09	0	0	43	0	0	0	0	0	0	2019-02-14T01:00:00.000	1970-01-01T16:52:32.019	157	0	0	0	43	0	0	0	0	0	1	0.037	100	0	44	0	0	0
0	0	0	0	0	0	0	1	0	0	0	269.184	0	0	0	3.4	103.4	0	0	0	-0.09	0	0	43	0	0	0	0	0	0	2019-02-14T01:00:00.000	1970-01-01T16:52:32.139	157	0	0	0	43	0	0	0	0	0	1	0.045	100	0	44	0	0	0
0	0	0	0	0	0	0	1	0	0	0	269.184	0	0	0	3.4	103.4	0	0	0	-0.09	0	0	43	0	0	0	0	0	0	2019-02-14T01:00:00.000	1970-01-01T16:52:32.139	157	0	0	0	43	0	0	0	0	0	1	0.045	100	0	44	0	0	0
0	0	0	0	0	0	0	1	0	0	0	269.184	0	0	0	3.4	103.4	0	0	0	-0.09	0	0	43	0	0	0	0	0	0	2019-02-14T01:00:00.000	1970-01-01T16:52:32.139	157	0	0	0	43	0	0	0	0	0	1	0.045	100	0	44	0	0	0
0	0	0	0	0	0	0	1	0	0	0	269.184	0	0	0	3.4	103.4	0	0	0	-0.09	0	0	43	0	0	0	0	0	0	2019-02-14T01:00:00.000	1970-01-01T16:52:32.139	157	0	0	0	43	0	0	0	0	0	1	0.045	100	0	44	0	0	0
0	0	0	0	0	0	0	1	0	0	0	269.184	0	0	0	3.4	103.4	0	0	0	-0.09	0	0	43	0	0	0	0	0	0	2019-02-14T01:00:00.000	1970-01-01T16:52:32.139	157	0	0	0	43	0	0	0	0	0	1	0.045	100	0	44	0	0	0
0	0	0	0	0	0	0	1	0	0	0	269.184	0	0	0	3.4	103.4	0	0	0	-0.09	0	0	43	0	0	0	0	0	0	2019-02-14T01:00:00.000	1970-01-01T16:52:32.249	157	0	0	0	43	0	0	0	0	0	1	0.045	100	0	44	0	0	0
0	0	0	0	0	0	0	1	0	0	0	269.184	0	0	0	3.4	103.4	0	0	0	-0.09	0	0	43	0	0	0	0	0	0	2019-02-14T01:00:00.000	1970-01-01T16:52:32.249	157	0	0	0	43	0	0	0	0	0	1	0.045	100	0	44	0	0	0
0	0	0	0	0	0	0	1	0	0	0	269.184	0	0	0	3.4	103.4	0	0	0	-0.09	0	0	43	0	0	0	0	0	0	2019-02-14T01:00:00.000	1970-01-01T16:52:32.249	157	0	0	0	43	0	0	0	0	0	1	0.045	100	0	44	0	0	0
0	0	0	0	0	0	0	1	0	0	0	269.184	0	0	0	3.4	103.4	0	0	0	-0.09	0	0	43	0	0	0	0	0	0	2019-02-14T01:00:00.000	1970-01-01T16:52:32.249	157	0	0	0	43	0	0	0	0	0	1	0.045	100	0	44	0	0	0
0	0	0	0	0	0	0	1	0	0	0	269.184	0	0	0	3.4	103.4	0	0	0	-0.09	0	0	43	0	0	0	0	0	0	2019-02-14T01:00:00.000	1970-01-01T16:52:32.249	157	0	0	0	43	0	0	0	0	0	1	0.045	100	0	44	0	0	0
0	0	0	0	0	0	0	1	0	0	0	269.184	0	0	0	3.4	103.4	0	0	0	-0.08	0	0	43	0	0	0	0	0	0	2019-02-14T01:00:00.000	1970-01-01T16:52:32.369	157	0	0	0	43	0	0	0	0	0	1	0.045	100	0	44	0	0	0
0	0	0	0	0	0	0	1	0	0	0	269.184	0	0	0	3.4	103.4	0	0	0	-0.08	0	0	43	0	0	0	0	0	0	2019-02-14T01:00:00.000	1970-01-01T16:52:32.369	157	0	0	0	43	0	0	0	0	0	1	0.045	100	0	44	0	0	0
0	0	0	0	0	0	0	1	0	0	0	269.184	0	0	0	3.4	103.4	0	0	0	-0.08	0	0	43	0	0	0	0	0	0	2019-02-14T01:00:00.000	1970-01-01T16:52:32.369	157	0	0	0	43	0	0	0	0	0	1	0.045	100	0	44	0	0	0
0	0	0	0	0	0	0	1	0	0	0	269.184	0	0	0	3.4	103.4	0	0	0	-0.08	0	0	43	0	0	0	0	0	0	2019-02-14T01:00:00.000	1970-01-01T16:52:32.369	157	0	0	0	43	0	0	0	0	0	1	0.045	100	0	44	0	0	0
0	0	0	0	0	0	0	1	0	0	0	269.184	0	0	0	3.4	103.4	0	0	0	-0.08	0	0	43	0	0	0	0	0	0	2019-02-14T01:00:00.000	1970-01-01T16:52:32.369	157	0	0	0	43	0	0	0	0	0	1	0.045	100	0	44	0	0	0
0	0	0	0	0	0	0	1	0	0	0	269.184	0	0	0	3.4	103.4	0	0	0	-0.085	0	0	43	0	0	0	0	0	0	2019-02-14T01:00:00.000	1970-01-01T16:52:32.489	157	0	0	0	43	0	0	0	0	0	1	0.045	100	0	44	0	0	0
0	0	0	0	0	0	0	1	0	0	0	269.184	0	0	0	3.4	103.4	0	0	0	-0.085	0	0	43	0	0	0	0	0	0	2019-02-14T01:00:00.000	1970-01-01T16:52:32.489	157	0	0	0	43	0	0	0	0	0	1	0.045	100	0	44	0	0	0
0	0	0	0	0	0	0	1	0	0	0	269.184	0	0	0	3.4	103.4	0	0	0	-0.085	0	0	43	0	0	0	0	0	0	2019-02-14T01:00:00.000	1970-01-01T16:52:32.489	157	0	0	0	43	0	0	0	0	0	1	0.045	100	0	44	0	0	0
0	0	0	0	0	0	0	1	0	0	0	269.184	0	0	0	3.4	103.4	0	0	0	-0.085	0	0	43	0	0	0	0	0	0	2019-02-14T01:00:00.000	1970-01-01T16:52:32.489	157	0	0	0	43	0	0	0	0	0	1	0.045	100	0	44	0	0	0
0	0	0	0	0	0	0	1	0	0	0	269.184	0	0	0	3.4	103.4	0	0	0	-0.085	0	0	43	0	0	0	0	0	0	2019-02-14T01:00:00.000	1970-01-01T16:52:32.489	157	0	0	0	43	0	0	0	0	0	1	0.045	100	0	44	0	0	0
0	0	0	0	0	0	0	1	0	0	0	269.184	0	0	0	3.4	103.4	0	0	0	-0.085	0	0	43	0	0	0	0	0	0	2019-02-14T01:00:00.000	1970-01-01T16:52:32.809	157	0	0	0	43	0	0	0	0	0	1	0.045	100	0	44	0	0	0
0	0	0	0	0	0	0	1	0	0	0	269.184	0	0	0	3.4	103.4	0	0	0	-0.085	0	0	43	0	0	0	0	0	0	2019-02-14T01:00:00.000	1970-01-01T16:52:32.809	157	0	0	0	43	0	0	0	0	0	1	0.045	100	0	44	0	0	0
0	0	0	0	0	0	0	1	0	0	0	269.184	0	0	0	3.4	103.4	0	0	0	-0.085	0	0	43	0	0	0	0	0	0	2019-02-14T01:00:00.000	1970-01-01T16:52:32.809	157	0	0	0	43	0	0	0	0	0	1	0.045	100	0	44	0	0	0
0	0	0	0	0	0	0	1	0	0	0	269.184	0	0	0	3.4	103.4	0	0	0	-0.085	0	0	43	0	0	0	0	0	0	2019-02-14T01:00:00.000	1970-01-01T16:52:32.809	157	0	0	0	43	0	0	0	0	0	1	0.045	100	0	44	0	0	0
0	0	0	0	0	0	0	1	0	0	0	269.184	0	0	0	3.4	103.4	0	0	0	-0.085	0	0	43	0	0	0	0	0	0	2019-02-14T01:00:00.000	1970-01-01T16:52:32.809	157	0	0	0	43	0	0	0	0	0	1	0.045	100	0	44	0	0	0
0	0	0	0	0	0	0	1	0	0	0	269.184	0	0	0	3.4	103.4	0	0	0	-0.09	0	0	43	0	0	0	0	0	0	2019-02-14T01:00:00.000	1970-01-01T16:52:32.929	157	0	0	0	43	0	0	0	0	0	1	0.045	100	0	44	0	0	0
0	0	0	0	0	0	0	1	0	0	0	269.184	0	0	0	3.4	103.4	0	0	0	-0.09	0	0	43	0	0	0	0	0	0	2019-02-14T01:00:00.000	1970-01-01T16:52:32.929	157	0	0	0	43	0	0	0	0	0	1	0.045	100	0	44	0	0	0
0	0	0	0	0	0	0	1	0	0	0	269.184	0	0	0	3.4	103.4	0	0	0	-0.09	0	0	43	0	0	0	0	0	0	2019-02-14T01:00:00.000	1970-01-01T16:52:32.929	157	0	0	0	43	0	0	0	0	0	1	0.045	100	0	44	0	0	0
0	0	0	0	0	0	0	1	0	0	0	269.184	0	0	0	3.4	103.4	0	0	0	-0.09	0	0	43	0	0	0	0	0	0	2019-02-14T01:00:00.000	1970-01-01T16:52:32.929	157	0	0	0	43	0	0	0	0	0	1	0.045	100	0	44	0	0	0
0	0	0	0	0	0	0	1	0	0	0	269.184	0	0	0	3.4	103.4	0	0	0	-0.09	0	0	43	0	0	0	0	0	0	2019-02-14T01:00:00.000	1970-01-01T16:52:32.929	157	0	0	0	43	0	0	0	0	0	1	0.045	100	0	44	0	0	0
0	0	0	0	0	0	0	1	0	0	0	269.184	0	0	0	3.4	103.4	0	0	0	-0.09	0	0	43	0	0	0	0	0	0	2019-02-14T01:00:00.000	1970-01-01T16:52:33.049	157	0	0	0	43	0	0	0	0	0	1	0.052	100	0	44	0	0	0
0	0	0	0	0	0	0	1	0	0	0	269.184	0	0	0	3.4	103.4	0	0	0	-0.09	0	0	43	0	0	0	0	0	0	2019-02-14T01:00:00.000	1970-01-01T16:52:33.049	157	0	0	0	43	0	0	0	0	0	1	0.052	100	0	44	0	0	0
0	0	0	0	0	0	0	1	0	0	0	269.184	0	0	0	3.4	103.4	0	0	0	-0.09	0	0	43	0	0	0	0	0	0	2019-02-14T01:00:00.000	1970-01-01T16:52:33.049	157	0	0	0	43	0	0	0	0	0	1	0.052	100	0	44	0	0	0
0	0	0	0	0	0	0	1	0	0	0	269.184	0	0	0	3.4	103.4	0	0	0	-0.09	0	0	43	0	0	0	0	0	0	2019-02-14T01:00:00.000	1970-01-01T16:52:33.049	157	0	0	0	43	0	0	0	0	0	1	0.052	100	0	44	0	0	0
0	0	0	0	0	0	0	1	0	0	0	269.184	0	0	0	3.4	103.4	0	0	0	-0.09	0	0	43	0	0	0	0	0	0	2019-02-14T01:00:00.000	1970-01-01T16:52:33.049	157	0	0	0	43	0	0	0	0	0	1	0.052	100	0	44	0	0	0
0	0	0	0	0	0	0	1	0	0	0	269.184	0	0	0	3.4	103.4	0	0	0	-0.09	0	0	43	0	0	0	0	0	0	2019-02-14T01:00:00.000	1970-01-01T16:52:33.169	157	0	0	0	43	0	0	0	0	0	1	0.045	100	0	44	0	0	0
0	0	0	0	0	0	0	1	0	0	0	269.184	0	0	0	3.4	103.4	0	0	0	-0.09	0	0	43	0	0	0	0	0	0	2019-02-14T01:00:00.000	1970-01-01T16:52:33.169	157	0	0	0	43	0	0	0	0	0	1	0.045	100	0	44	0	0	0
0	0	0	0	0	0	0	1	0	0	0	269.184	0	0	0	3.4	103.4	0	0	0	-0.09	0	0	43	0	0	0	0	0	0	2019-02-14T01:00:00.000	1970-01-01T16:52:33.169	157	0	0	0	43	0	0	0	0	0	1	0.045	100	0	44	0	0	0
0	0	0	0	0	0	0	1	0	0	0	269.184	0	0	0	3.4	103.4	0	0	0	-0.09	0	0	43	0	0	0	0	0	0	2019-02-14T01:00:00.000	1970-01-01T16:52:33.169	157	0	0	0	43	0	0	0	0	0	1	0.045	100	0	44	0	0	0
0	0	0	0	0	0	0	1	0	0	0	269.184	0	0	0	3.4	103.4	0	0	0	-0.09	0	0	43	0	0	0	0	0	0	2019-02-14T01:00:00.000	1970-01-01T16:52:33.169	157	0	0	0	43	0	0	0	0	0	1	0.045	100	0	44	0	0	0
0	0	0	0	0	0	0	1	0	0	0	269.184	0	0	0	3.4	103.4	0	0	0	-0.075	0	0	43	0	0	0	0	0	0	2019-02-14T01:00:00.000	1970-01-01T16:52:33.289	157	0	0	0	43	0	0	0	0	0	1	0.052	100	0	44	0	0	0
0	0	0	0	0	0	0	1	0	0	0	269.184	0	0	0	3.4	103.4	0	0	0	-0.075	0	0	43	0	0	0	0	0	0	2019-02-14T01:00:00.000	1970-01-01T16:52:33.289	157	0	0	0	43	0	0	0	0	0	1	0.052	100	0	44	0	0	0
0	0	0	0	0	0	0	1	0	0	0	269.184	0	0	0	3.4	103.4	0	0	0	-0.075	0	0	43	0	0	0	0	0	0	2019-02-14T01:00:00.000	1970-01-01T16:52:33.289	157	0	0	0	43	0	0	0	0	0	1	0.052	100	0	44	0	0	0
0	0	0	0	0	0	0	1	0	0	0	269.184	0	0	0	3.4	103.4	0	0	0	-0.075	0	0	43	0	0	0	0	0	0	2019-02-14T01:00:00.000	1970-01-01T16:52:33.289	157	0	0	0	43	0	0	0	0	0	1	0.052	100	0	44	0	0	0
0	0	0	0	0	0	0	1	0	0	0	269.184	0	0	0	3.4	103.4	0	0	0	-0.075	0	0	43	0	0	0	0	0	0	2019-02-14T01:00:00.000	1970-01-01T16:52:33.289	157	0	0	0	43	0	0	0	0	0	1	0.052	100	0	44	0	0	0
0	0	0	0	0	0	0	1	0	0	0	269.184	0	0	0	3.4	103.4	0	0	0	-0.085	0	0	43	0	0	0	0	0	0	2019-02-14T01:00:00.000	1970-01-01T16:52:33.399	157	0	0	0	43	0	0	0	0	0	1	0.037	100	0	44	0	0	0
0	0	0	0	0	0	0	1	0	0	0	269.184	0	0	0	3.4	103.4	0	0	0	-0.085	0	0	43	0	0	0	0	0	0	2019-02-14T01:00:00.000	1970-01-01T16:52:33.399	157	0	0	0	43	0	0	0	0	0	1	0.037	100	0	44	0	0	0
0	0	0	0	0	0	0	1	0	0	0	269.184	0	0	0	3.4	103.4	0	0	0	-0.085	0	0	43	0	0	0	0	0	0	2019-02-14T01:00:00.000	1970-01-01T16:52:33.399	157	0	0	0	43	0	0	0	0	0	1	0.037	100	0	44	0	0	0
0	0	0	0	0	0	0	1	0	0	0	269.184	0	0	0	3.4	103.4	0	0	0	-0.085	0	0	43	0	0	0	0	0	0	2019-02-14T01:00:00.000	1970-01-01T16:52:33.399	157	0	0	0	43	0	0	0	0	0	1	0.037	100	0	44	0	0	0
0	0	0	0	0	0	0	1	0	0	0	269.184	0	0	0	3.4	103.4	0	0	0	-0.085	0	0	43	0	0	0	0	0	0	2019-02-14T01:00:00.000	1970-01-01T16:52:33.399	157	0	0	0	43	0	0	0	0	0	1	0.037	100	0	44	0	0	0
0	0	0	0	0	0	0	1	0	0	0	269.184	0	0	0	3.4	103.4	0	0	0	-0.095	0	0	43	0	0	0	0	0	0	2019-02-14T01:00:00.000	1970-01-01T16:52:33.719	157	0	0	0	43	0	0	0	0	0	1	0.03	100	0	44	0	0	0
0	0	0	0	0	0	0	1	0	0	0	269.184	0	0	0	3.4	103.4	0	0	0	-0.095	0	0	43	0	0	0	0	0	0	2019-02-14T01:00:00.000	1970-01-01T16:52:33.719	157	0	0	0	43	0	0	0	0	0	1	0.03	100	0	44	0	0	0
0	0	0	0	0	0	0	1	0	0	0	269.184	0	0	0	3.4	103.4	0	0	0	-0.095	0	0	43	0	0	0	0	0	0	2019-02-14T01:00:00.000	1970-01-01T16:52:33.719	157	0	0	0	43	0	0	0	0	0	1	0.03	100	0	44	0	0	0
0	0	0	0	0	0	0	1	0	0	0	269.184	0	0	0	3.4	103.4	0	0	0	-0.095	0	0	43	0	0	0	0	0	0	2019-02-14T01:00:00.000	1970-01-01T16:52:33.719	157	0	0	0	43	0	0	0	0	0	1	0.03	100	0	44	0	0	0
0	0	0	0	0	0	0	1	0	0	0	269.184	0	0	0	3.4	103.4	0	0	0	-0.095	0	0	43	0	0	0	0	0	0	2019-02-14T01:00:00.000	1970-01-01T16:52:33.719	157	0	0	0	43	0	0	0	0	0	1	0.03	100	0	44	0	0	0
0	0	0	0	0	0	0	1	0	0	0	269.184	0	0	0	3.4	103.4	0	0	0	-0.085	0	0	43	0	0	0	0	0	0	2019-02-14T01:00:00.000	1970-01-01T16:52:33.839	157	0	0	0	43	0	0	0	0	0	1	0.052	100	0	44	0	0	0
0	0	0	0	0	0	0	1	0	0	0	269.184	0	0	0	3.4	103.4	0	0	0	-0.085	0	0	43	0	0	0	0	0	0	2019-02-14T01:00:00.000	1970-01-01T16:52:33.839	157	0	0	0	43	0	0	0	0	0	1	0.052	100	0	44	0	0	0
0	0	0	0	0	0	0	1	0	0	0	269.184	0	0	0	3.4	103.4	0	0	0	-0.085	0	0	43	0	0	0	0	0	0	2019-02-14T01:00:00.000	1970-01-01T16:52:33.839	157	0	0	0	43	0	0	0	0	0	1	0.052	100	0	44	0	0	0
0	0	0	0	0	0	0	1	0	0	0	269.184	0	0	0	3.4	103.4	0	0	0	-0.085	0	0	43	0	0	0	0	0	0	2019-02-14T01:00:00.000	1970-01-01T16:52:33.839	157	0	0	0	43	0	0	0	0	0	1	0.052	100	0	44	0	0	0
0	0	0	0	0	0	0	1	0	0	0	269.184	0	0	0	3.4	103.4	0	0	0	-0.085	0	0	43	0	0	0	0	0	0	2019-02-14T01:00:00.000	1970-01-01T16:52:33.839	157	0	0	0	43	0	0	0	0	0	1	0.052	100	0	44	0	0	0
0	0	0	0	0	0	0	1	0	0	0	269.184	0	0	0	3.4	103.4	0	0	0	-0.085	0	0	43	0	0	0	0	0	0	2019-02-14T01:00:00.000	1970-01-01T16:52:33.959	157	0	0	0	43	0	0	0	0	0	1	0.06	100	0	44	0	0	0
0	0	0	0	0	0	0	1	0	0	0	269.184	0	0	0	3.4	103.4	0	0	0	-0.085	0	0	43	0	0	0	0	0	0	2019-02-14T01:00:00.000	1970-01-01T16:52:33.959	157	0	0	0	43	0	0	0	0	0	1	0.06	100	0	44	0	0	0
0	0	0	0	0	0	0	1	0	0	0	269.184	0	0	0	3.4	103.4	0	0	0	-0.085	0	0	43	0	0	0	0	0	0	2019-02-14T01:00:00.000	1970-01-01T16:52:33.959	157	0	0	0	43	0	0	0	0	0	1	0.06	100	0	44	0	0	0
0	0	0	0	0	0	0	1	0	0	0	269.184	0	0	0	3.4	103.4	0	0	0	-0.085	0	0	43	0	0	0	0	0	0	2019-02-14T01:00:00.000	1970-01-01T16:52:33.959	157	0	0	0	43	0	0	0	0	0	1	0.06	100	0	44	0	0	0
0	0	0	0	0	0	0	1	0	0	0	269.184	0	0	0	3.4	103.4	0	0	0	-0.085	0	0	43	0	0	0	0	0	0	2019-02-14T01:00:00.000	1970-01-01T16:52:33.959	157	0	0	0	43	0	0	0	0	0	1	0.06	100	0	44	0	0	0
0	0	0	0	0	0	0	1	0	0	0	269.184	0	0	0	3.4	103.4	0	0	0	-0.085	0	0	43	0	0	0	0	0	0	2019-02-14T01:00:00.000	1970-01-01T16:52:34.079	157	0	0	0	43	0	0	0	0	0	1	0.037	100	0	44	0	0	0
0	0	0	0	0	0	0	1	0	0	0	269.184	0	0	0	3.4	103.4	0	0	0	-0.085	0	0	43	0	0	0	0	0	0	2019-02-14T01:00:00.000	1970-01-01T16:52:34.079	157	0	0	0	43	0	0	0	0	0	1	0.037	100	0	44	0	0	0
0	0	0	0	0	0	0	1	0	0	0	269.184	0	0	0	3.4	103.4	0	0	0	-0.085	0	0	43	0	0	0	0	0	0	2019-02-14T01:00:00.000	1970-01-01T16:52:34.079	157	0	0	0	43	0	0	0	0	0	1	0.037	100	0	44	0	0	0
0	0	0	0	0	0	0	1	0	0	0	269.184	0	0	0	3.4	103.4	0	0	0	-0.085	0	0	43	0	0	0	0	0	0	2019-02-14T01:00:00.000	1970-01-01T16:52:34.079	157	0	0	0	43	0	0	0	0	0	1	0.037	100	0	44	0	0	0
0	0	0	0	0	0	0	1	0	0	0	269.184	0	0	0	3.4	103.4	0	0	0	-0.085	0	0	43	0	0	0	0	0	0	2019-02-14T01:00:00.000	1970-01-01T16:52:34.079	157	0	0	0	43	0	0	0	0	0	1	0.037	100	0	44	0	0	0
0	0	0	0	0	0	0	1	0	0	0	269.184	0	0	0	3.4	103.4	0	0	0	-0.09	0	0	43	0	0	0	0	0	0	2019-02-14T01:00:00.000	1970-01-01T16:52:34.409	157	0	0	0	43	0	0	0	0	0	1	0.045	100	0	44	0	0	0
0	0	0	0	0	0	0	1	0	0	0	269.184	0	0	0	3.4	103.4	0	0	0	-0.09	0	0	43	0	0	0	0	0	0	2019-02-14T01:00:00.000	1970-01-01T16:52:34.409	157	0	0	0	43	0	0	0	0	0	1	0.045	100	0	44	0	0	0
0	0	0	0	0	0	0	1	0	0	0	269.184	0	0	0	3.4	103.4	0	0	0	-0.09	0	0	43	0	0	0	0	0	0	2019-02-14T01:00:00.000	1970-01-01T16:52:34.409	157	0	0	0	43	0	0	0	0	0	1	0.045	100	0	44	0	0	0
0	0	0	0	0	0	0	1	0	0	0	269.184	0	0	0	3.4	103.4	0	0	0	-0.09	0	0	43	0	0	0	0	0	0	2019-02-14T01:00:00.000	1970-01-01T16:52:34.409	157	0	0	0	43	0	0	0	0	0	1	0.045	100	0	44	0	0	0
0	0	0	0	0	0	0	1	0	0	0	269.184	0	0	0	3.4	103.4	0	0	0	-0.09	0	0	43	0	0	0	0	0	0	2019-02-14T01:00:00.000	1970-01-01T16:52:34.409	157	0	0	0	43	0	0	0	0	0	1	0.045	100	0	44	0	0	0
0	0	0	0	0	0	0	1	0	0	0	269.184	0	0	0	3.4	103.4	0	0	0	-0.09	0	0	43	0	0	0	0	0	0	2019-02-14T01:00:00.000	1970-01-01T16:52:34.519	157	0	0	0	43	0	0	0	0	0	1	0.037	100	0	44	0	0	0
0	0	0	0	0	0	0	1	0	0	0	269.184	0	0	0	3.4	103.4	0	0	0	-0.09	0	0	43	0	0	0	0	0	0	2019-02-14T01:00:00.000	1970-01-01T16:52:34.519	157	0	0	0	43	0	0	0	0	0	1	0.037	100	0	44	0	0	0
0	0	0	0	0	0	0	1	0	0	0	269.184	0	0	0	3.4	103.4	0	0	0	-0.09	0	0	43	0	0	0	0	0	0	2019-02-14T01:00:00.000	1970-01-01T16:52:34.519	157	0	0	0	43	0	0	0	0	0	1	0.037	100	0	44	0	0	0
0	0	0	0	0	0	0	1	0	0	0	269.184	0	0	0	3.4	103.4	0	0	0	-0.09	0	0	43	0	0	0	0	0	0	2019-02-14T01:00:00.000	1970-01-01T16:52:34.519	157	0	0	0	43	0	0	0	0	0	1	0.037	100	0	44	0	0	0
0	0	0	0	0	0	0	1	0	0	0	269.184	0	0	0	3.4	103.4	0	0	0	-0.09	0	0	43	0	0	0	0	0	0	2019-02-14T01:00:00.000	1970-01-01T16:52:34.519	157	0	0	0	43	0	0	0	0	0	1	0.037	100	0	44	0	0	0
0	0	0	0	0	0	0	1	0	0	0	269.184	0	0	0	3.4	103.4	0	0	0	-0.095	0	0	43	0	0	0	0	0	0	2019-02-14T01:00:00.000	1970-01-01T16:52:34.639	157	0	0	0	43	0	0	0	0	0	1	0.045	100	0	44	0	0	0
0	0	0	0	0	0	0	1	0	0	0	269.184	0	0	0	3.4	103.4	0	0	0	-0.095	0	0	43	0	0	0	0	0	0	2019-02-14T01:00:00.000	1970-01-01T16:52:34.639	157	0	0	0	43	0	0	0	0	0	1	0.045	100	0	44	0	0	0
0	0	0	0	0	0	0	1	0	0	0	269.184	0	0	0	3.4	103.4	0	0	0	-0.095	0	0	43	0	0	0	0	0	0	2019-02-14T01:00:00.000	1970-01-01T16:52:34.639	157	0	0	0	43	0	0	0	0	0	1	0.045	100	0	44	0	0	0
0	0	0	0	0	0	0	1	0	0	0	269.184	0	0	0	3.4	103.4	0	0	0	-0.095	0	0	43	0	0	0	0	0	0	2019-02-14T01:00:00.000	1970-01-01T16:52:34.639	157	0	0	0	43	0	0	0	0	0	1	0.045	100	0	44	0	0	0
0	0	0	0	0	0	0	1	0	0	0	269.184	0	0	0	3.4	103.4	0	0	0	-0.095	0	0	43	0	0	0	0	0	0	2019-02-14T01:00:00.000	1970-01-01T16:52:34.639	157	0	0	0	43	0	0	0	0	0	1	0.045	100	0	44	0	0	0
0	0	0	0	0	0	0	1	0	0	0	269.184	0	0	0	3.4	103.4	0	0	0	-0.085	0	0	43	0	0	0	0	0	0	2019-02-14T01:00:00.000	1970-01-01T16:52:34.759	157	0	0	0	43	0	0	0	0	0	1	0.052	100	0	44	0	0	0
0	0	0	0	0	0	0	1	0	0	0	269.184	0	0	0	3.4	103.4	0	0	0	-0.085	0	0	43	0	0	0	0	0	0	2019-02-14T01:00:00.000	1970-01-01T16:52:34.759	157	0	0	0	43	0	0	0	0	0	1	0.052	100	0	44	0	0	0
0	0	0	0	0	0	0	1	0	0	0	269.184	0	0	0	3.4	103.4	0	0	0	-0.085	0	0	43	0	0	0	0	0	0	2019-02-14T01:00:00.000	1970-01-01T16:52:34.759	157	0	0	0	43	0	0	0	0	0	1	0.052	100	0	44	0	0	0
0	0	0	0	0	0	0	1	0	0	0	269.184	0	0	0	3.4	103.4	0	0	0	-0.085	0	0	43	0	0	0	0	0	0	2019-02-14T01:00:00.000	1970-01-01T16:52:34.759	157	0	0	0	43	0	0	0	0	0	1	0.052	100	0	44	0	0	0
0	0	0	0	0	0	0	1	0	0	0	269.184	0	0	0	3.4	103.4	0	0	0	-0.085	0	0	43	0	0	0	0	0	0	2019-02-14T01:00:00.000	1970-01-01T16:52:34.759	157	0	0	0	43	0	0	0	0	0	1	0.052	100	0	44	0	0	0
0	0	0	0	0	0	0	1	0	0	0	269.184	0	0	0	3.4	103.4	0	0	0	-0.085	0	0	43	0	0	0	0	0	0	2019-02-14T01:00:00.000	1970-01-01T16:52:34.869	157	0	0	0	43	0	0	0	0	0	1	0.045	100	0	44	0	0	0
0	0	0	0	0	0	0	1	0	0	0	269.184	0	0	0	3.4	103.4	0	0	0	-0.085	0	0	43	0	0	0	0	0	0	2019-02-14T01:00:00.000	1970-01-01T16:52:34.869	157	0	0	0	43	0	0	0	0	0	1	0.045	100	0	44	0	0	0
0	0	0	0	0	0	0	1	0	0	0	269.184	0	0	0	3.4	103.4	0	0	0	-0.085	0	0	43	0	0	0	0	0	0	2019-02-14T01:00:00.000	1970-01-01T16:52:34.869	157	0	0	0	43	0	0	0	0	0	1	0.045	100	0	44	0	0	0
0	0	0	0	0	0	0	1	0	0	0	269.184	0	0	0	3.4	103.4	0	0	0	-0.085	0	0	43	0	0	0	0	0	0	2019-02-14T01:00:00.000	1970-01-01T16:52:34.869	157	0	0	0	43	0	0	0	0	0	1	0.045	100	0	44	0	0	0
0	0	0	0	0	0	0	1	0	0	0	269.184	0	0	0	3.4	103.4	0	0	0	-0.085	0	0	43	0	0	0	0	0	0	2019-02-14T01:00:00.000	1970-01-01T16:52:34.869	157	0	0	0	43	0	0	0	0	0	1	0.045	100	0	44	0	0	0
0	0	0	0	0	0	0	1	0	0	0	269.184	0	0	0	3.4	103.4	0	0	0	-0.09	0	0	43	0	0	0	0	0	0	2019-02-14T01:00:00.000	1970-01-01T16:52:34.989	157	0	0	0	43	0	0	0	0	0	1	0.045	100	0	44	0	0	0
0	0	0	0	0	0	0	1	0	0	0	269.184	0	0	0	3.4	103.4	0	0	0	-0.075	0	0	43	0	0	0	0	0	0	2019-02-14T01:00:00.000	1970-01-01T16:52:35.229	157	0	0	0	43	0	0	0	0	0	1	0.045	100	0	44	0	0	0
0	0	0	0	0	0	0	1	0	0	0	269.184	0	0	0	3.4	103.4	0	0	0	-0.075	0	0	43	0	0	0	0	0	0	2019-02-14T01:00:00.000	1970-01-01T16:52:35.229	157	0	0	0	43	0	0	0	0	0	1	0.045	100	0	44	0	0	0
0	0	0	0	0	0	0	1	0	0	0	269.184	0	0	0	3.4	103.4	0	0	0	-0.075	0	0	43	0	0	0	0	0	0	2019-02-14T01:00:00.000	1970-01-01T16:52:35.229	157	0	0	0	43	0	0	0	0	0	1	0.045	100	0	44	0	0	0
0	0	0	0	0	0	0	1	0	0	0	269.184	0	0	0	3.4	103.4	0	0	0	-0.075	0	0	43	0	0	0	0	0	0	2019-02-14T01:00:00.000	1970-01-01T16:52:35.229	157	0	0	0	43	0	0	0	0	0	1	0.045	100	0	44	0	0	0
0	0	0	0	0	0	0	1	0	0	0	269.184	0	0	0	3.4	103.4	0	0	0	-0.075	0	0	43	0	0	0	0	0	0	2019-02-14T01:00:00.000	1970-01-01T16:52:35.229	157	0	0	0	43	0	0	0	0	0	1	0.045	100	0	44	0	0	0
0	0	0	0	0	0	0	1	0	0	0	269.184	0	0	0	3.4	103.4	0	0	0	-0.085	0	0	43	0	0	0	0	0	0	2019-02-14T01:00:00.000	1970-01-01T16:52:35.349	157	0	0	0	43	0	0	0	0	0	1	0.037	100	0	44	0	0	0
0	0	0	0	0	0	0	1	0	0	0	269.184	0	0	0	3.4	103.4	0	0	0	-0.085	0	0	43	0	0	0	0	0	0	2019-02-14T01:00:00.000	1970-01-01T16:52:35.349	157	0	0	0	43	0	0	0	0	0	1	0.037	100	0	44	0	0	0
0	0	0	0	0	0	0	1	0	0	0	269.184	0	0	0	3.4	103.4	0	0	0	-0.085	0	0	43	0	0	0	0	0	0	2019-02-14T01:00:00.000	1970-01-01T16:52:35.349	157	0	0	0	43	0	0	0	0	0	1	0.037	100	0	44	0	0	0
0	0	0	0	0	0	0	1	0	0	0	269.184	0	0	0	3.4	103.4	0	0	0	-0.085	0	0	43	0	0	0	0	0	0	2019-02-14T01:00:00.000	1970-01-01T16:52:35.349	157	0	0	0	43	0	0	0	0	0	1	0.037	100	0	44	0	0	0
0	0	0	0	0	0	0	1	0	0	0	269.184	0	0	0	3.4	103.4	0	0	0	-0.085	0	0	43	0	0	0	0	0	0	2019-02-14T01:00:00.000	1970-01-01T16:52:35.349	157	0	0	0	43	0	0	0	0	0	1	0.037	100	0	44	0	0	0
0	0	0	0	0	0	0	1	0	0	0	269.184	0	0	0	3.4	103.4	0	0	0	-0.08	0	0	43	0	0	0	0	0	0	2019-02-14T01:00:00.000	1970-01-01T16:52:35.459	157	0	0	0	43	0	0	0	0	0	1	0.03	100	0	44	0	0	0
0	0	0	0	0	0	0	1	0	0	0	269.184	0	0	0	3.4	103.4	0	0	0	-0.08	0	0	43	0	0	0	0	0	0	2019-02-14T01:00:00.000	1970-01-01T16:52:35.459	157	0	0	0	43	0	0	0	0	0	1	0.03	100	0	44	0	0	0
0	0	0	0	0	0	0	1	0	0	0	269.184	0	0	0	3.4	103.4	0	0	0	-0.08	0	0	43	0	0	0	0	0	0	2019-02-14T01:00:00.000	1970-01-01T16:52:35.459	157	0	0	0	43	0	0	0	0	0	1	0.03	100	0	44	0	0	0
0	0	0	0	0	0	0	1	0	0	0	269.184	0	0	0	3.4	103.4	0	0	0	-0.08	0	0	43	0	0	0	0	0	0	2019-02-14T01:00:00.000	1970-01-01T16:52:35.459	157	0	0	0	43	0	0	0	0	0	1	0.03	100	0	44	0	0	0
0	0	0	0	0	0	0	1	0	0	0	269.184	0	0	0	3.4	103.4	0	0	0	-0.08	0	0	43	0	0	0	0	0	0	2019-02-14T01:00:00.000	1970-01-01T16:52:35.459	157	0	0	0	43	0	0	0	0	0	1	0.03	100	0	44	0	0	0
0	0	0	0	0	0	0	1	0	0	0	269.184	0	0	0	3.4	103.4	0	0	0	-0.095	0	0	43	0	0	0	0	0	0	2019-02-14T01:00:00.000	1970-01-01T16:52:35.579	157	0	0	0	43	0	0	0	0	0	1	0.045	100	0	44	0	0	0
0	0	0	0	0	0	0	1	0	0	0	269.184	0	0	0	3.4	103.4	0	0	0	-0.095	0	0	43	0	0	0	0	0	0	2019-02-14T01:00:00.000	1970-01-01T16:52:35.579	157	0	0	0	43	0	0	0	0	0	1	0.045	100	0	44	0	0	0
0	0	0	0	0	0	0	1	0	0	0	269.184	0	0	0	3.4	103.4	0	0	0	-0.095	0	0	43	0	0	0	0	0	0	2019-02-14T01:00:00.000	1970-01-01T16:52:35.579	157	0	0	0	43	0	0	0	0	0	1	0.045	100	0	44	0	0	0
0	0	0	0	0	0	0	1	0	0	0	269.184	0	0	0	3.4	103.4	0	0	0	-0.095	0	0	43	0	0	0	0	0	0	2019-02-14T01:00:00.000	1970-01-01T16:52:35.579	157	0	0	0	43	0	0	0	0	0	1	0.045	100	0	44	0	0	0
0	0	0	0	0	0	0	1	0	0	0	269.184	0	0	0	3.4	103.4	0	0	0	-0.095	0	0	43	0	0	0	0	0	0	2019-02-14T01:00:00.000	1970-01-01T16:52:35.579	157	0	0	0	43	0	0	0	0	0	1	0.045	100	0	44	0	0	0
0	0	0	0	0	0	0	1	0	0	0	269.184	0	0	0	3.4	103.4	0	0	0	-0.095	0	0	43	0	0	0	0	0	0	2019-02-14T01:00:00.000	1970-01-01T16:52:35.699	157	0	0	0	43	0	0	0	0	0	1	0.037	100	0	44	0	0	0
0	0	0	0	0	0	0	1	0	0	0	269.184	0	0	0	3.4	103.4	0	0	0	-0.095	0	0	43	0	0	0	0	0	0	2019-02-14T01:00:00.000	1970-01-01T16:52:35.699	157	0	0	0	43	0	0	0	0	0	1	0.037	100	0	44	0	0	0
0	0	0	0	0	0	0	1	0	0	0	269.184	0	0	0	3.4	103.4	0	0	0	-0.095	0	0	43	0	0	0	0	0	0	2019-02-14T01:00:00.000	1970-01-01T16:52:35.699	157	0	0	0	43	0	0	0	0	0	1	0.037	100	0	44	0	0	0
0	0	0	0	0	0	0	1	0	0	0	269.184	0	0	0	3.4	103.4	0	0	0	-0.095	0	0	43	0	0	0	0	0	0	2019-02-14T01:00:00.000	1970-01-01T16:52:35.699	157	0	0	0	43	0	0	0	0	0	1	0.037	100	0	44	0	0	0
0	0	0	0	0	0	0	1	0	0	0	269.184	0	0	0	3.4	103.4	0	0	0	-0.095	0	0	43	0	0	0	0	0	0	2019-02-14T01:00:00.000	1970-01-01T16:52:35.699	157	0	0	0	43	0	0	0	0	0	1	0.037	100	0	44	0	0	0
0	0	0	0	0	0	0	1	0	0	0	269.184	0	0	0	3.4	103.4	0	0	0	-0.07	0	0	43	0	0	0	0	0	0	2019-02-14T01:00:00.000	1970-01-01T16:52:35.809	157	0	0	0	43	0	0	0	0	0	1	0.037	100	0	44	0	0	0
0	0	0	0	0	0	0	1	0	0	0	269.184	0	0	0	3.4	103.4	0	0	0	-0.07	0	0	43	0	0	0	0	0	0	2019-02-14T01:00:00.000	1970-01-01T16:52:35.809	157	0	0	0	43	0	0	0	0	0	1	0.037	100	0	44	0	0	0
0	0	0	0	0	0	0	1	0	0	0	269.184	0	0	0	3.4	103.4	0	0	0	-0.07	0	0	43	0	0	0	0	0	0	2019-02-14T01:00:00.000	1970-01-01T16:52:35.809	157	0	0	0	43	0	0	0	0	0	1	0.037	100	0	44	0	0	0
0	0	0	0	0	0	0	1	0	0	0	269.184	0	0	0	3.4	103.4	0	0	0	-0.07	0	0	43	0	0	0	0	0	0	2019-02-14T01:00:00.000	1970-01-01T16:52:35.809	157	0	0	0	43	0	0	0	0	0	1	0.037	100	0	44	0	0	0
0	0	0	0	0	0	0	1	0	0	0	269.184	0	0	0	3.4	103.4	0	0	0	-0.07	0	0	43	0	0	0	0	0	0	2019-02-14T01:00:00.000	1970-01-01T16:52:35.809	157	0	0	0	43	0	0	0	0	0	1	0.037	100	0	44	0	0	0
0	0	0	0	0	0	0	1	0	0	0	269.184	0	0	0	3.4	103.4	0	0	0	-0.075	0	0	43	0	0	0	0	0	0	2019-02-14T01:00:00.000	1970-01-01T16:52:35.929	157	0	0	0	43	0	0	0	0	0	1	0.045	100	0	44	0	0	0
0	0	0	0	0	0	0	1	0	0	0	269.184	0	0	0	3.4	103.4	0	0	0	-0.075	0	0	43	0	0	0	0	0	0	2019-02-14T01:00:00.000	1970-01-01T16:52:35.929	157	0	0	0	43	0	0	0	0	0	1	0.045	100	0	44	0	0	0
0	0	0	0	0	0	0	1	0	0	0	269.184	0	0	0	3.4	103.4	0	0	0	-0.075	0	0	43	0	0	0	0	0	0	2019-02-14T01:00:00.000	1970-01-01T16:52:35.929	157	0	0	0	43	0	0	0	0	0	1	0.045	100	0	44	0	0	0
0	0	0	0	0	0	0	1	0	0	0	269.184	0	0	0	3.4	103.4	0	0	0	-0.085	0	0	43	0	0	0	0	0	0	2019-02-14T01:00:00.000	1970-01-01T16:52:36.219	157	0	0	0	43	0	0	0	0	0	1	0.045	100	0	44	0	0	0
0	0	0	0	0	0	0	1	0	0	0	269.184	0	0	0	3.4	103.4	0	0	0	-0.085	0	0	43	0	0	0	0	0	0	2019-02-14T01:00:00.000	1970-01-01T16:52:36.219	157	0	0	0	43	0	0	0	0	0	1	0.045	100	0	44	0	0	0
0	0	0	0	0	0	0	1	0	0	0	269.184	0	0	0	3.4	103.4	0	0	0	-0.085	0	0	43	0	0	0	0	0	0	2019-02-14T01:00:00.000	1970-01-01T16:52:36.219	157	0	0	0	43	0	0	0	0	0	1	0.045	100	0	44	0	0	0
0	0	0	0	0	0	0	1	0	0	0	269.184	0	0	0	3.4	103.4	0	0	0	-0.085	0	0	43	0	0	0	0	0	0	2019-02-14T01:00:00.000	1970-01-01T16:52:36.219	157	0	0	0	43	0	0	0	0	0	1	0.045	100	0	44	0	0	0
0	0	0	0	0	0	0	1	0	0	0	269.184	0	0	0	3.4	103.4	0	0	0	-0.085	0	0	43	0	0	0	0	0	0	2019-02-14T01:00:00.000	1970-01-01T16:52:36.219	157	0	0	0	43	0	0	0	0	0	1	0.045	100	0	44	0	0	0
0	0	0	0	0	0	0	1	0	0	0	269.184	0	0	0	3.4	103.4	0	0	0	-0.1	0	0	43	0	0	0	0	0	0	2019-02-14T01:00:00.000	1970-01-01T16:52:36.339	157	0	0	0	43	0	0	0	0	0	1	0.052	100	0	44	0	0	0
0	0	0	0	0	0	0	1	0	0	0	269.184	0	0	0	3.4	103.4	0	0	0	-0.1	0	0	43	0	0	0	0	0	0	2019-02-14T01:00:00.000	1970-01-01T16:52:36.339	157	0	0	0	43	0	0	0	0	0	1	0.052	100	0	44	0	0	0
0	0	0	0	0	0	0	1	0	0	0	269.184	0	0	0	3.4	103.4	0	0	0	-0.1	0	0	43	0	0	0	0	0	0	2019-02-14T01:00:00.000	1970-01-01T16:52:36.339	157	0	0	0	43	0	0	0	0	0	1	0.052	100	0	44	0	0	0
0	0	0	0	0	0	0	1	0	0	0	269.184	0	0	0	3.4	103.4	0	0	0	-0.1	0	0	43	0	0	0	0	0	0	2019-02-14T01:00:00.000	1970-01-01T16:52:36.339	157	0	0	0	43	0	0	0	0	0	1	0.052	100	0	44	0	0	0
0	0	0	0	0	0	0	1	0	0	0	269.184	0	0	0	3.4	103.4	0	0	0	-0.1	0	0	43	0	0	0	0	0	0	2019-02-14T01:00:00.000	1970-01-01T16:52:36.339	157	0	0	0	43	0	0	0	0	0	1	0.052	100	0	44	0	0	0
0	0	0	0	0	0	0	1	0	0	0	269.184	0	0	0	3.4	103.4	0	0	0	-0.09	0	0	43	0	0	0	0	0	0	2019-02-14T01:00:00.000	1970-01-01T16:52:36.449	157	0	0	0	43	0	0	0	0	0	1	0.037	100	0	44	0	0	0
0	0	0	0	0	0	0	1	0	0	0	269.184	0	0	0	3.4	103.4	0	0	0	-0.09	0	0	43	0	0	0	0	0	0	2019-02-14T01:00:00.000	1970-01-01T16:52:36.449	157	0	0	0	43	0	0	0	0	0	1	0.037	100	0	44	0	0	0
0	0	0	0	0	0	0	1	0	0	0	269.184	0	0	0	3.4	103.4	0	0	0	-0.09	0	0	43	0	0	0	0	0	0	2019-02-14T01:00:00.000	1970-01-01T16:52:36.449	157	0	0	0	43	0	0	0	0	0	1	0.037	100	0	44	0	0	0
0	0	0	0	0	0	0	1	0	0	0	269.184	0	0	0	3.4	103.4	0	0	0	-0.09	0	0	43	0	0	0	0	0	0	2019-02-14T01:00:00.000	1970-01-01T16:52:36.449	157	0	0	0	43	0	0	0	0	0	1	0.037	100	0	44	0	0	0
0	0	0	0	0	0	0	1	0	0	0	269.184	0	0	0	3.4	103.4	0	0	0	-0.09	0	0	43	0	0	0	0	0	0	2019-02-14T01:00:00.000	1970-01-01T16:52:36.449	157	0	0	0	43	0	0	0	0	0	1	0.037	100	0	44	0	0	0
0	0	0	0	0	0	0	1	0	0	0	269.184	0	0	0	3.4	103.4	0	0	0	-0.095	0	0	43	0	0	0	0	0	0	2019-02-14T01:00:00.000	1970-01-01T16:52:36.569	157	0	0	0	43	0	0	0	0	0	1	0.037	100	0	44	0	0	0
0	0	0	0	0	0	0	1	0	0	0	269.184	0	0	0	3.4	103.4	0	0	0	-0.095	0	0	43	0	0	0	0	0	0	2019-02-14T01:00:00.000	1970-01-01T16:52:36.569	157	0	0	0	43	0	0	0	0	0	1	0.037	100	0	44	0	0	0
0	0	0	0	0	0	0	1	0	0	0	269.184	0	0	0	3.4	103.4	0	0	0	-0.095	0	0	43	0	0	0	0	0	0	2019-02-14T01:00:00.000	1970-01-01T16:52:36.569	157	0	0	0	43	0	0	0	0	0	1	0.037	100	0	44	0	0	0
0	0	0	0	0	0	0	1	0	0	0	269.184	0	0	0	3.4	103.4	0	0	0	-0.095	0	0	43	0	0	0	0	0	0	2019-02-14T01:00:00.000	1970-01-01T16:52:36.569	157	0	0	0	43	0	0	0	0	0	1	0.037	100	0	44	0	0	0
0	0	0	0	0	0	0	1	0	0	0	269.184	0	0	0	3.4	103.4	0	0	0	-0.095	0	0	43	0	0	0	0	0	0	2019-02-14T01:00:00.000	1970-01-01T16:52:36.569	157	0	0	0	43	0	0	0	0	0	1	0.037	100	0	44	0	0	0
0	0	0	0	0	0	0	1	0	0	0	269.184	0	0	0	3.4	103.4	0	0	0	-0.08	0	0	43	0	0	0	0	0	0	2019-02-14T01:00:00.000	1970-01-01T16:52:36.689	157	0	0	0	43	0	0	0	0	0	1	0.037	100	0	44	0	0	0
0	0	0	0	0	0	0	1	0	0	0	269.184	0	0	0	3.4	103.4	0	0	0	-0.08	0	0	43	0	0	0	0	0	0	2019-02-14T01:00:00.000	1970-01-01T16:52:36.689	157	0	0	0	43	0	0	0	0	0	1	0.037	100	0	44	0	0	0
0	0	0	0	0	0	0	1	0	0	0	269.184	0	0	0	3.4	103.4	0	0	0	-0.08	0	0	43	0	0	0	0	0	0	2019-02-14T01:00:00.000	1970-01-01T16:52:36.689	157	0	0	0	43	0	0	0	0	0	1	0.037	100	0	44	0	0	0
0	0	0	0	0	0	0	1	0	0	0	269.184	0	0	0	3.4	103.4	0	0	0	-0.08	0	0	43	0	0	0	0	0	0	2019-02-14T01:00:00.000	1970-01-01T16:52:36.689	157	0	0	0	43	0	0	0	0	0	1	0.037	100	0	44	0	0	0
0	0	0	0	0	0	0	1	0	0	0	269.184	0	0	0	3.4	103.4	0	0	0	-0.08	0	0	43	0	0	0	0	0	0	2019-02-14T01:00:00.000	1970-01-01T16:52:36.689	157	0	0	0	43	0	0	0	0	0	1	0.037	100	0	44	0	0	0
0	0	0	0	0	0	0	1	0	0	0	269.184	0	0	0	3.4	103.4	0	0	0	-0.085	0	0	43	0	0	0	0	0	0	2019-02-14T01:00:00.000	1970-01-01T16:52:36.799	157	0	0	0	43	0	0	0	0	0	1	0.037	100	0	44	0	0	0
0	0	0	0	0	0	0	1	0	0	0	269.184	0	0	0	3.4	103.4	0	0	0	-0.085	0	0	43	0	0	0	0	0	0	2019-02-14T01:00:00.000	1970-01-01T16:52:36.799	157	0	0	0	43	0	0	0	0	0	1	0.037	100	0	44	0	0	0
0	0	0	0	0	0	0	1	0	0	0	269.184	0	0	0	3.4	103.4	0	0	0	-0.085	0	0	43	0	0	0	0	0	0	2019-02-14T01:00:00.000	1970-01-01T16:52:36.799	157	0	0	0	43	0	0	0	0	0	1	0.037	100	0	44	0	0	0
0	0	0	0	0	0	0	1	0	0	0	269.184	0	0	0	3.4	103.4	0	0	0	-0.085	0	0	43	0	0	0	0	0	0	2019-02-14T01:00:00.000	1970-01-01T16:52:36.799	157	0	0	0	43	0	0	0	0	0	1	0.037	100	0	44	0	0	0
0	0	0	0	0	0	0	1	0	0	0	269.184	0	0	0	3.4	103.4	0	0	0	-0.085	0	0	43	0	0	0	0	0	0	2019-02-14T01:00:00.000	1970-01-01T16:52:36.799	157	0	0	0	43	0	0	0	0	0	1	0.037	100	0	44	0	0	0
0	0	0	0	0	0	0	1	0	0	0	269.184	0	0	0	3.4	103.4	0	0	0	-0.085	0	0	43	0	0	0	0	0	0	2019-02-14T01:00:00.000	1970-01-01T16:52:36.919	157	0	0	0	43	0	0	0	0	0	1	0.045	100	0	44	0	0	0
0	0	0	0	0	0	0	1	0	0	0	269.184	0	0	0	3.4	103.4	0	0	0	-0.085	0	0	43	0	0	0	0	0	0	2019-02-14T01:00:00.000	1970-01-01T16:52:36.919	157	0	0	0	43	0	0	0	0	0	1	0.045	100	0	44	0	0	0
0	0	0	0	0	0	0	1	0	0	0	269.184	0	0	0	3.4	103.4	0	0	0	-0.085	0	0	43	0	0	0	0	0	0	2019-02-14T01:00:00.000	1970-01-01T16:52:36.919	157	0	0	0	43	0	0	0	0	0	1	0.045	100	0	44	0	0	0
0	0	0	0	0	0	0	1	0	0	0	269.184	0	0	0	3.4	103.4	0	0	0	-0.085	0	0	43	0	0	0	0	0	0	2019-02-14T01:00:00.000	1970-01-01T16:52:36.919	157	0	0	0	43	0	0	0	0	0	1	0.045	100	0	44	0	0	0
0	0	0	0	0	0	0	1	0	0	0	269.184	0	0	0	3.4	103.4	0	0	0	-0.085	0	0	43	0	0	0	0	0	0	2019-02-14T01:00:00.000	1970-01-01T16:52:36.919	157	0	0	0	43	0	0	0	0	0	1	0.045	100	0	44	0	0	0
0	0	0	0	0	0	0	1	0	0	0	269.184	0	0	0	3.4	103.4	0	0	0	-0.085	0	0	43	0	0	0	0	0	0	2019-02-14T01:00:00.000	1970-01-01T16:52:37.249	157	0	0	0	43	0	0	0	0	0	1	0.045	100	0	44	0	0	0
0	0	0	0	0	0	0	1	0	0	0	269.184	0	0	0	3.4	103.4	0	0	0	-0.085	0	0	43	0	0	0	0	0	0	2019-02-14T01:00:00.000	1970-01-01T16:52:37.249	157	0	0	0	43	0	0	0	0	0	1	0.045	100	0	44	0	0	0
0	0	0	0	0	0	0	1	0	0	0	269.184	0	0	0	3.4	103.4	0	0	0	-0.085	0	0	43	0	0	0	0	0	0	2019-02-14T01:00:00.000	1970-01-01T16:52:37.249	157	0	0	0	43	0	0	0	0	0	1	0.045	100	0	44	0	0	0
0	0	0	0	0	0	0	1	0	0	0	269.184	0	0	0	3.4	103.4	0	0	0	-0.085	0	0	43	0	0	0	0	0	0	2019-02-14T01:00:00.000	1970-01-01T16:52:37.249	157	0	0	0	43	0	0	0	0	0	1	0.045	100	0	44	0	0	0
0	0	0	0	0	0	0	1	0	0	0	269.184	0	0	0	3.4	103.4	0	0	0	-0.085	0	0	43	0	0	0	0	0	0	2019-02-14T01:00:00.000	1970-01-01T16:52:37.249	157	0	0	0	43	0	0	0	0	0	1	0.045	100	0	44	0	0	0
0	0	0	0	0	0	0	1	0	0	0	269.184	0	0	0	3.4	103.4	0	0	0	-0.085	0	0	43	0	0	0	0	0	0	2019-02-14T01:00:00.000	1970-01-01T16:52:37.369	157	0	0	0	43	0	0	0	0	0	1	0.045	100	0	44	0	0	0
0	0	0	0	0	0	0	1	0	0	0	269.184	0	0	0	3.4	103.4	0	0	0	-0.085	0	0	43	0	0	0	0	0	0	2019-02-14T01:00:00.000	1970-01-01T16:52:37.369	157	0	0	0	43	0	0	0	0	0	1	0.045	100	0	44	0	0	0
0	0	0	0	0	0	0	1	0	0	0	269.184	0	0	0	3.4	103.4	0	0	0	-0.085	0	0	43	0	0	0	0	0	0	2019-02-14T01:00:00.000	1970-01-01T16:52:37.369	157	0	0	0	43	0	0	0	0	0	1	0.045	100	0	44	0	0	0
0	0	0	0	0	0	0	1	0	0	0	269.184	0	0	0	3.4	103.4	0	0	0	-0.085	0	0	43	0	0	0	0	0	0	2019-02-14T01:00:00.000	1970-01-01T16:52:37.369	157	0	0	0	43	0	0	0	0	0	1	0.045	100	0	44	0	0	0
0	0	0	0	0	0	0	1	0	0	0	269.184	0	0	0	3.4	103.4	0	0	0	-0.085	0	0	43	0	0	0	0	0	0	2019-02-14T01:00:00.000	1970-01-01T16:52:37.369	157	0	0	0	43	0	0	0	0	0	1	0.045	100	0	44	0	0	0
0	0	0	0	0	0	0	1	0	0	0	269.184	0	0	0	3.4	103.4	0	0	0	-0.095	0	0	43	0	0	0	0	0	0	2019-02-14T01:00:00.000	1970-01-01T16:52:37.489	157	0	0	0	43	0	0	0	0	0	1	0.045	100	0	44	0	0	0
0	0	0	0	0	0	0	1	0	0	0	269.184	0	0	0	3.4	103.4	0	0	0	-0.095	0	0	43	0	0	0	0	0	0	2019-02-14T01:00:00.000	1970-01-01T16:52:37.489	157	0	0	0	43	0	0	0	0	0	1	0.045	100	0	44	0	0	0
0	0	0	0	0	0	0	1	0	0	0	269.184	0	0	0	3.4	103.4	0	0	0	-0.095	0	0	43	0	0	0	0	0	0	2019-02-14T01:00:00.000	1970-01-01T16:52:37.489	157	0	0	0	43	0	0	0	0	0	1	0.045	100	0	44	0	0	0
0	0	0	0	0	0	0	1	0	0	0	269.184	0	0	0	3.4	103.4	0	0	0	-0.095	0	0	43	0	0	0	0	0	0	2019-02-14T01:00:00.000	1970-01-01T16:52:37.489	157	0	0	0	43	0	0	0	0	0	1	0.045	100	0	44	0	0	0
0	0	0	0	0	0	0	1	0	0	0	269.184	0	0	0	3.4	103.4	0	0	0	-0.095	0	0	43	0	0	0	0	0	0	2019-02-14T01:00:00.000	1970-01-01T16:52:37.489	157	0	0	0	43	0	0	0	0	0	1	0.045	100	0	44	0	0	0
0	0	0	0	0	0	0	1	0	0	0	269.184	0	0	0	3.4	103.4	0	0	0	-0.08	0	0	43	0	0	0	0	0	0	2019-02-14T01:00:00.000	1970-01-01T16:52:37.599	157	0	0	0	43	0	0	0	0	0	1	0.052	100	0	44	0	0	0
0	0	0	0	0	0	0	1	0	0	0	269.184	0	0	0	3.4	103.4	0	0	0	-0.08	0	0	43	0	0	0	0	0	0	2019-02-14T01:00:00.000	1970-01-01T16:52:37.599	157	0	0	0	43	0	0	0	0	0	1	0.052	100	0	44	0	0	0
0	0	0	0	0	0	0	1	0	0	0	269.184	0	0	0	3.4	103.4	0	0	0	-0.08	0	0	43	0	0	0	0	0	0	2019-02-14T01:00:00.000	1970-01-01T16:52:37.599	157	0	0	0	43	0	0	0	0	0	1	0.052	100	0	44	0	0	0
0	0	0	0	0	0	0	1	0	0	0	269.184	0	0	0	3.4	103.4	0	0	0	-0.08	0	0	43	0	0	0	0	0	0	2019-02-14T01:00:00.000	1970-01-01T16:52:37.599	157	0	0	0	43	0	0	0	0	0	1	0.052	100	0	44	0	0	0
0	0	0	0	0	0	0	1	0	0	0	269.184	0	0	0	3.4	103.4	0	0	0	-0.08	0	0	43	0	0	0	0	0	0	2019-02-14T01:00:00.000	1970-01-01T16:52:37.599	157	0	0	0	43	0	0	0	0	0	1	0.052	100	0	44	0	0	0
0	0	0	0	0	0	0	1	0	0	0	269.184	0	0	0	3.4	103.4	0	0	0	-0.08	0	0	43	0	0	0	0	0	0	2019-02-14T01:00:00.000	1970-01-01T16:52:37.719	157	0	0	0	43	0	0	0	0	0	1	0.052	100	0	44	0	0	0
0	0	0	0	0	0	0	1	0	0	0	269.184	0	0	0	3.4	103.4	0	0	0	-0.08	0	0	43	0	0	0	0	0	0	2019-02-14T01:00:00.000	1970-01-01T16:52:37.719	157	0	0	0	43	0	0	0	0	0	1	0.052	100	0	44	0	0	0
0	0	0	0	0	0	0	1	0	0	0	269.184	0	0	0	3.4	103.4	0	0	0	-0.08	0	0	43	0	0	0	0	0	0	2019-02-14T01:00:00.000	1970-01-01T16:52:37.719	157	0	0	0	43	0	0	0	0	0	1	0.052	100	0	44	0	0	0
0	0	0	0	0	0	0	1	0	0	0	269.184	0	0	0	3.4	103.4	0	0	0	-0.08	0	0	43	0	0	0	0	0	0	2019-02-14T01:00:00.000	1970-01-01T16:52:37.719	157	0	0	0	43	0	0	0	0	0	1	0.052	100	0	44	0	0	0
0	0	0	0	0	0	0	1	0	0	0	269.184	0	0	0	3.4	103.4	0	0	0	-0.08	0	0	43	0	0	0	0	0	0	2019-02-14T01:00:00.000	1970-01-01T16:52:37.719	157	0	0	0	43	0	0	0	0	0	1	0.052	100	0	44	0	0	0
0	0	0	0	0	0	0	1	0	0	0	269.184	0	0	0	3.4	103.4	0	0	0	-0.09	0	0	43	0	0	0	0	0	0	2019-02-14T01:00:00.000	1970-01-01T16:52:37.839	157	0	0	0	43	0	0	0	0	0	1	0.03	100	0	44	0	0	0
0	0	0	0	0	0	0	1	0	0	0	269.184	0	0	0	3.4	103.4	0	0	0	-0.09	0	0	43	0	0	0	0	0	0	2019-02-14T01:00:00.000	1970-01-01T16:52:37.839	157	0	0	0	43	0	0	0	0	0	1	0.03	100	0	44	0	0	0
0	0	0	0	0	0	0	1	0	0	0	269.184	0	0	0	3.4	103.4	0	0	0	-0.09	0	0	43	0	0	0	0	0	0	2019-02-14T01:00:00.000	1970-01-01T16:52:37.839	157	0	0	0	43	0	0	0	0	0	1	0.03	100	0	44	0	0	0
0	0	0	0	0	0	0	1	0	0	0	269.184	0	0	0	3.4	103.4	0	0	0	-0.09	0	0	43	0	0	0	0	0	0	2019-02-14T01:00:00.000	1970-01-01T16:52:37.839	157	0	0	0	43	0	0	0	0	0	1	0.03	100	0	44	0	0	0
0	0	0	0	0	0	0	1	0	0	0	269.184	0	0	0	3.4	103.4	0	0	0	-0.09	0	0	43	0	0	0	0	0	0	2019-02-14T01:00:00.000	1970-01-01T16:52:37.839	157	0	0	0	43	0	0	0	0	0	1	0.03	100	0	44	0	0	0
0	0	0	0	0	0	0	1	0	0	0	269.184	0	0	0	3.4	103.4	0	0	0	-0.085	0	0	43	0	0	0	0	0	0	2019-02-14T01:00:00.000	1970-01-01T16:52:37.949	157	0	0	0	43	0	0	0	0	0	1	0.045	100	0	44	0	0	0
0	0	0	0	0	0	0	1	0	0	0	269.184	0	0	0	3.4	103.4	0	0	0	-0.085	0	0	43	0	0	0	0	0	0	2019-02-14T01:00:00.000	1970-01-01T16:52:37.949	157	0	0	0	43	0	0	0	0	0	1	0.045	100	0	44	0	0	0
0	0	0	0	0	0	0	1	0	0	0	269.184	0	0	0	3.4	103.4	0	0	0	-0.085	0	0	43	0	0	0	0	0	0	2019-02-14T01:00:00.000	1970-01-01T16:52:37.949	157	0	0	0	43	0	0	0	0	0	1	0.045	100	0	44	0	0	0
0	0	0	0	0	0	0	1	0	0	0	269.184	0	0	0	3.4	103.4	0	0	0	-0.085	0	0	43	0	0	0	0	0	0	2019-02-14T01:00:00.000	1970-01-01T16:52:37.949	157	0	0	0	43	0	0	0	0	0	1	0.045	100	0	44	0	0	0
0	0	0	0	0	0	0	1	0	0	0	269.184	0	0	0	3.4	103.4	0	0	0	-0.085	0	0	43	0	0	0	0	0	0	2019-02-14T01:00:00.000	1970-01-01T16:52:37.949	157	0	0	0	43	0	0	0	0	0	1	0.045	100	0	44	0	0	0
0	0	0	0	0	0	0	1	0	0	0	269.184	0	0	0	3.4	103.4	0	0	0	-0.085	0	0	43	0	0	0	0	0	0	2019-02-14T01:00:00.000	1970-01-01T16:52:38.069	157	0	0	0	43	0	0	0	0	0	1	0.052	100	0	44	0	0	0
0	0	0	0	0	0	0	1	0	0	0	269.184	0	0	0	3.4	103.4	0	0	0	-0.085	0	0	43	0	0	0	0	0	0	2019-02-14T01:00:00.000	1970-01-01T16:52:38.069	157	0	0	0	43	0	0	0	0	0	1	0.052	100	0	44	0	0	0
0	0	0	0	0	0	0	1	0	0	0	269.184	0	0	0	3.4	103.4	0	0	0	-0.085	0	0	43	0	0	0	0	0	0	2019-02-14T01:00:00.000	1970-01-01T16:52:38.069	157	0	0	0	43	0	0	0	0	0	1	0.052	100	0	44	0	0	0
0	0	0	0	0	0	0	1	0	0	0	269.184	0	0	0	3.4	103.4	0	0	0	-0.085	0	0	43	0	0	0	0	0	0	2019-02-14T01:00:00.000	1970-01-01T16:52:38.069	157	0	0	0	43	0	0	0	0	0	1	0.052	100	0	44	0	0	0
0	0	0	0	0	0	0	1	0	0	0	269.184	0	0	0	3.4	103.4	0	0	0	-0.085	0	0	43	0	0	0	0	0	0	2019-02-14T01:00:00.000	1970-01-01T16:52:38.069	157	0	0	0	43	0	0	0	0	0	1	0.052	100	0	44	0	0	0
0	0	0	0	0	0	0	1	0	0	0	269.184	0	0	0	3.4	103.4	0	0	0	-0.08	0	0	43	0	0	0	0	0	0	2019-02-14T01:00:00.000	1970-01-01T16:52:38.179	157	0	0	0	43	0	0	0	0	0	1	0.045	100	0	44	0	0	0
0	0	0	0	0	0	0	1	0	0	0	269.184	0	0	0	3.4	103.4	0	0	0	-0.08	0	0	43	0	0	0	0	0	0	2019-02-14T01:00:00.000	1970-01-01T16:52:38.179	157	0	0	0	43	0	0	0	0	0	1	0.045	100	0	44	0	0	0
0	0	0	0	0	0	0	1	0	0	0	269.184	0	0	0	3.4	103.4	0	0	0	-0.08	0	0	43	0	0	0	0	0	0	2019-02-14T01:00:00.000	1970-01-01T16:52:38.179	157	0	0	0	43	0	0	0	0	0	1	0.045	100	0	44	0	0	0
0	0	0	0	0	0	0	1	0	0	0	269.184	0	0	0	3.4	103.4	0	0	0	-0.08	0	0	43	0	0	0	0	0	0	2019-02-14T01:00:00.000	1970-01-01T16:52:38.179	157	0	0	0	43	0	0	0	0	0	1	0.045	100	0	44	0	0	0
0	0	0	0	0	0	0	1	0	0	0	269.184	0	0	0	3.4	103.4	0	0	0	-0.08	0	0	43	0	0	0	0	0	0	2019-02-14T01:00:00.000	1970-01-01T16:52:38.179	157	0	0	0	43	0	0	0	0	0	1	0.045	100	0	44	0	0	0
0	0	0	0	0	0	0	1	0	0	0	269.184	0	0	0	3.4	103.4	0	0	0	-0.085	0	0	43	0	0	0	0	0	0	2019-02-14T01:00:00.000	1970-01-01T16:52:38.299	157	0	0	0	43	0	0	0	0	0	1	0.045	100	0	44	0	0	0
0	0	0	0	0	0	0	1	0	0	0	269.184	0	0	0	3.4	103.4	0	0	0	-0.085	0	0	43	0	0	0	0	0	0	2019-02-14T01:00:00.000	1970-01-01T16:52:38.299	157	0	0	0	43	0	0	0	0	0	1	0.045	100	0	44	0	0	0
0	0	0	0	0	0	0	1	0	0	0	269.184	0	0	0	3.4	103.4	0	0	0	-0.085	0	0	43	0	0	0	0	0	0	2019-02-14T01:00:00.000	1970-01-01T16:52:38.299	157	0	0	0	43	0	0	0	0	0	1	0.045	100	0	44	0	0	0
0	0	0	0	0	0	0	1	0	0	0	269.184	0	0	0	3.4	103.4	0	0	0	-0.085	0	0	43	0	0	0	0	0	0	2019-02-14T01:00:00.000	1970-01-01T16:52:38.299	157	0	0	0	43	0	0	0	0	0	1	0.045	100	0	44	0	0	0
0	0	0	0	0	0	0	1	0	0	0	269.184	0	0	0	3.4	103.4	0	0	0	-0.085	0	0	43	0	0	0	0	0	0	2019-02-14T01:00:00.000	1970-01-01T16:52:38.299	157	0	0	0	43	0	0	0	0	0	1	0.045	100	0	44	0	0	0
0	0	0	0	0	0	0	1	0	0	0	269.184	0	0	0	3.4	103.4	0	0	0	-0.08	0	0	43	0	0	0	0	0	0	2019-02-14T01:00:00.000	1970-01-01T16:52:38.419	157	0	0	0	43	0	0	0	0	0	1	0.045	100	0	44	0	0	0
0	0	0	0	0	0	0	1	0	0	0	269.184	0	0	0	3.4	103.4	0	0	0	-0.08	0	0	43	0	0	0	0	0	0	2019-02-14T01:00:00.000	1970-01-01T16:52:38.419	157	0	0	0	43	0	0	0	0	0	1	0.045	100	0	44	0	0	0
0	0	0	0	0	0	0	1	0	0	0	269.184	0	0	0	3.4	103.4	0	0	0	-0.08	0	0	43	0	0	0	0	0	0	2019-02-14T01:00:00.000	1970-01-01T16:52:38.419	157	0	0	0	43	0	0	0	0	0	1	0.045	100	0	44	0	0	0
0	0	0	0	0	0	0	1	0	0	0	269.184	0	0	0	3.4	103.4	0	0	0	-0.08	0	0	43	0	0	0	0	0	0	2019-02-14T01:00:00.000	1970-01-01T16:52:38.419	157	0	0	0	43	0	0	0	0	0	1	0.045	100	0	44	0	0	0
0	0	0	0	0	0	0	1	0	0	0	269.184	0	0	0	3.4	103.4	0	0	0	-0.08	0	0	43	0	0	0	0	0	0	2019-02-14T01:00:00.000	1970-01-01T16:52:38.419	157	0	0	0	43	0	0	0	0	0	1	0.045	100	0	44	0	0	0
0	0	0	0	0	0	0	1	0	0	0	269.184	0	0	0	3.4	103.4	0	0	0	-0.08	0	0	43	0	0	0	0	0	0	2019-02-14T01:00:00.000	1970-01-01T16:52:38.539	157	0	0	0	43	0	0	0	0	0	1	0.037	100	0	44	0	0	0
0	0	0	0	0	0	0	1	0	0	0	269.184	0	0	0	3.4	103.4	0	0	0	-0.08	0	0	43	0	0	0	0	0	0	2019-02-14T01:00:00.000	1970-01-01T16:52:38.539	157	0	0	0	43	0	0	0	0	0	1	0.037	100	0	44	0	0	0
0	0	0	0	0	0	0	1	0	0	0	269.184	0	0	0	3.4	103.4	0	0	0	-0.08	0	0	43	0	0	0	0	0	0	2019-02-14T01:00:00.000	1970-01-01T16:52:38.539	157	0	0	0	43	0	0	0	0	0	1	0.037	100	0	44	0	0	0
0	0	0	0	0	0	0	1	0	0	0	269.184	0	0	0	3.4	103.4	0	0	0	-0.08	0	0	43	0	0	0	0	0	0	2019-02-14T01:00:00.000	1970-01-01T16:52:38.539	157	0	0	0	43	0	0	0	0	0	1	0.037	100	0	44	0	0	0
0	0	0	0	0	0	0	1	0	0	0	269.184	0	0	0	3.4	103.4	0	0	0	-0.08	0	0	43	0	0	0	0	0	0	2019-02-14T01:00:00.000	1970-01-01T16:52:38.539	157	0	0	0	43	0	0	0	0	0	1	0.037	100	0	44	0	0	0
0	0	0	0	0	0	0	1	0	0	0	269.184	0	0	0	3.4	103.4	0	0	0	-0.085	0	0	43	0	0	0	0	0	0	2019-02-14T01:00:00.000	1970-01-01T16:52:38.649	157	0	0	0	43	0	0	0	0	0	1	0.045	100	0	44	0	0	0
0	0	0	0	0	0	0	1	0	0	0	269.184	0	0	0	3.4	103.4	0	0	0	-0.085	0	0	43	0	0	0	0	0	0	2019-02-14T01:00:00.000	1970-01-01T16:52:38.649	157	0	0	0	43	0	0	0	0	0	1	0.045	100	0	44	0	0	0
0	0	0	0	0	0	0	1	0	0	0	269.184	0	0	0	3.4	103.4	0	0	0	-0.085	0	0	43	0	0	0	0	0	0	2019-02-14T01:00:00.000	1970-01-01T16:52:38.649	157	0	0	0	43	0	0	0	0	0	1	0.045	100	0	44	0	0	0
0	0	0	0	0	0	0	1	0	0	0	269.184	0	0	0	3.4	103.4	0	0	0	-0.085	0	0	43	0	0	0	0	0	0	2019-02-14T01:00:00.000	1970-01-01T16:52:38.649	157	0	0	0	43	0	0	0	0	0	1	0.045	100	0	44	0	0	0
0	0	0	0	0	0	0	1	0	0	0	269.184	0	0	0	3.4	103.4	0	0	0	-0.085	0	0	43	0	0	0	0	0	0	2019-02-14T01:00:00.000	1970-01-01T16:52:38.649	157	0	0	0	43	0	0	0	0	0	1	0.045	100	0	44	0	0	0
0	0	0	0	0	0	0	1	0	0	0	269.184	0	0	0	3.4	103.4	0	0	0	-0.075	0	0	43	0	0	0	0	0	0	2019-02-14T01:00:00.000	1970-01-01T16:52:38.769	157	0	0	0	43	0	0	0	0	0	1	0.045	100	0	44	0	0	0
0	0	0	0	0	0	0	1	0	0	0	269.184	0	0	0	3.4	103.4	0	0	0	-0.075	0	0	43	0	0	0	0	0	0	2019-02-14T01:00:00.000	1970-01-01T16:52:38.769	157	0	0	0	43	0	0	0	0	0	1	0.045	100	0	44	0	0	0
0	0	0	0	0	0	0	1	0	0	0	269.184	0	0	0	3.4	103.4	0	0	0	-0.075	0	0	43	0	0	0	0	0	0	2019-02-14T01:00:00.000	1970-01-01T16:52:38.769	157	0	0	0	43	0	0	0	0	0	1	0.045	100	0	44	0	0	0
0	0	0	0	0	0	0	1	0	0	0	269.184	0	0	0	3.4	103.4	0	0	0	-0.075	0	0	43	0	0	0	0	0	0	2019-02-14T01:00:00.000	1970-01-01T16:52:38.769	157	0	0	0	43	0	0	0	0	0	1	0.045	100	0	44	0	0	0
0	0	0	0	0	0	0	1	0	0	0	269.184	0	0	0	3.4	103.4	0	0	0	-0.075	0	0	43	0	0	0	0	0	0	2019-02-14T01:00:00.000	1970-01-01T16:52:38.769	157	0	0	0	43	0	0	0	0	0	1	0.045	100	0	44	0	0	0
0	0	0	0	0	0	0	1	0	0	0	269.184	0	0	0	3.4	103.4	0	0	0	-0.085	0	0	43	0	0	0	0	0	0	2019-02-14T01:00:00.000	1970-01-01T16:52:38.889	157	0	0	0	43	0	0	0	0	0	1	0.045	100	0	44	0	0	0
0	0	0	0	0	0	0	1	0	0	0	269.184	0	0	0	3.4	103.4	0	0	0	-0.085	0	0	43	0	0	0	0	0	0	2019-02-14T01:00:00.000	1970-01-01T16:52:38.889	157	0	0	0	43	0	0	0	0	0	1	0.045	100	0	44	0	0	0
0	0	0	0	0	0	0	1	0	0	0	269.184	0	0	0	3.4	103.4	0	0	0	-0.085	0	0	43	0	0	0	0	0	0	2019-02-14T01:00:00.000	1970-01-01T16:52:38.889	157	0	0	0	43	0	0	0	0	0	1	0.045	100	0	44	0	0	0
0	0	0	0	0	0	0	1	0	0	0	269.184	0	0	0	3.4	103.4	0	0	0	-0.085	0	0	43	0	0	0	0	0	0	2019-02-14T01:00:00.000	1970-01-01T16:52:38.889	157	0	0	0	43	0	0	0	0	0	1	0.045	100	0	44	0	0	0
0	0	0	0	0	0	0	1	0	0	0	269.184	0	0	0	3.4	103.4	0	0	0	-0.085	0	0	43	0	0	0	0	0	0	2019-02-14T01:00:00.000	1970-01-01T16:52:38.889	157	0	0	0	43	0	0	0	0	0	1	0.045	100	0	44	0	0	0
0	0	0	0	0	0	0	1	0	0	0	269.184	0	0	0	3.4	103.4	0	0	0	-0.08	0	0	43	0	0	0	0	0	0	2019-02-14T01:00:00.000	1970-01-01T16:52:38.999	157	0	0	0	43	0	0	0	0	0	1	0.052	100	0	44	0	0	0
0	0	0	0	0	0	0	1	0	0	0	269.184	0	0	0	3.4	103.4	0	0	0	-0.08	0	0	43	0	0	0	0	0	0	2019-02-14T01:00:00.000	1970-01-01T16:52:38.999	157	0	0	0	43	0	0	0	0	0	1	0.052	100	0	44	0	0	0
0	0	0	0	0	0	0	1	0	0	0	269.184	0	0	0	3.4	103.4	0	0	0	-0.08	0	0	43	0	0	0	0	0	0	2019-02-14T01:00:00.000	1970-01-01T16:52:38.999	157	0	0	0	43	0	0	0	0	0	1	0.052	100	0	44	0	0	0
0	0	0	0	0	0	0	1	0	0	0	269.184	0	0	0	3.4	103.4	0	0	0	-0.08	0	0	43	0	0	0	0	0	0	2019-02-14T01:00:00.000	1970-01-01T16:52:38.999	157	0	0	0	43	0	0	0	0	0	1	0.052	100	0	44	0	0	0
0	0	0	0	0	0	0	1	0	0	0	269.184	0	0	0	3.4	103.4	0	0	0	-0.08	0	0	43	0	0	0	0	0	0	2019-02-14T01:00:00.000	1970-01-01T16:52:38.999	157	0	0	0	43	0	0	0	0	0	1	0.052	100	0	44	0	0	0
0	0	0	0	0	0	0	1	0	0	0	269.184	0	0	0	3.4	103.4	0	0	0	-0.09	0	0	43	0	0	0	0	0	0	2019-02-14T01:00:00.000	1970-01-01T16:52:39.119	157	0	0	0	43	0	0	0	0	0	1	0.045	100	0	44	0	0	0
0	0	0	0	0	0	0	1	0	0	0	269.184	0	0	0	3.4	103.4	0	0	0	-0.09	0	0	43	0	0	0	0	0	0	2019-02-14T01:00:00.000	1970-01-01T16:52:39.119	157	0	0	0	43	0	0	0	0	0	1	0.045	100	0	44	0	0	0
0	0	0	0	0	0	0	1	0	0	0	269.184	0	0	0	3.4	103.4	0	0	0	-0.09	0	0	43	0	0	0	0	0	0	2019-02-14T01:00:00.000	1970-01-01T16:52:39.119	157	0	0	0	43	0	0	0	0	0	1	0.045	100	0	44	0	0	0
0	0	0	0	0	0	0	1	0	0	0	269.184	0	0	0	3.4	103.4	0	0	0	-0.09	0	0	43	0	0	0	0	0	0	2019-02-14T01:00:00.000	1970-01-01T16:52:39.119	157	0	0	0	43	0	0	0	0	0	1	0.045	100	0	44	0	0	0
0	0	0	0	0	0	0	1	0	0	0	269.184	0	0	0	3.4	103.4	0	0	0	-0.09	0	0	43	0	0	0	0	0	0	2019-02-14T01:00:00.000	1970-01-01T16:52:39.119	157	0	0	0	43	0	0	0	0	0	1	0.045	100	0	44	0	0	0
0	0	0	0	0	0	0	1	0	0	0	269.184	0	0	0	3.4	103.4	0	0	0	-0.07	0	0	43	0	0	0	0	0	0	2019-02-14T01:00:00.000	1970-01-01T16:52:39.239	157	0	0	0	43	0	0	0	0	0	1	0.037	100	0	44	0	0	0
0	0	0	0	0	0	0	1	0	0	0	269.184	0	0	0	3.4	103.4	0	0	0	-0.07	0	0	43	0	0	0	0	0	0	2019-02-14T01:00:00.000	1970-01-01T16:52:39.239	157	0	0	0	43	0	0	0	0	0	1	0.037	100	0	44	0	0	0
0	0	0	0	0	0	0	1	0	0	0	269.184	0	0	0	3.4	103.4	0	0	0	-0.07	0	0	43	0	0	0	0	0	0	2019-02-14T01:00:00.000	1970-01-01T16:52:39.239	157	0	0	0	43	0	0	0	0	0	1	0.037	100	0	44	0	0	0
0	0	0	0	0	0	0	1	0	0	0	269.184	0	0	0	3.4	103.4	0	0	0	-0.07	0	0	43	0	0	0	0	0	0	2019-02-14T01:00:00.000	1970-01-01T16:52:39.239	157	0	0	0	43	0	0	0	0	0	1	0.037	100	0	44	0	0	0
0	0	0	0	0	0	0	1	0	0	0	269.184	0	0	0	3.4	103.4	0	0	0	-0.07	0	0	43	0	0	0	0	0	0	2019-02-14T01:00:00.000	1970-01-01T16:52:39.239	157	0	0	0	43	0	0	0	0	0	1	0.037	100	0	44	0	0	0
0	0	0	0	0	0	0	1	0	0	0	269.184	0	0	0	3.4	103.4	0	0	0	-0.075	0	0	43	0	0	0	0	0	0	2019-02-14T01:00:00.000	1970-01-01T16:52:39.349	157	0	0	0	43	0	0	0	0	0	1	0.052	100	0	44	0	0	0
0	0	0	0	0	0	0	1	0	0	0	269.184	0	0	0	3.4	103.4	0	0	0	-0.075	0	0	43	0	0	0	0	0	0	2019-02-14T01:00:00.000	1970-01-01T16:52:39.349	157	0	0	0	43	0	0	0	0	0	1	0.052	100	0	44	0	0	0
0	0	0	0	0	0	0	1	0	0	0	269.184	0	0	0	3.4	103.4	0	0	0	-0.075	0	0	43	0	0	0	0	0	0	2019-02-14T01:00:00.000	1970-01-01T16:52:39.349	157	0	0	0	43	0	0	0	0	0	1	0.052	100	0	44	0	0	0
0	0	0	0	0	0	0	1	0	0	0	269.184	0	0	0	3.4	103.4	0	0	0	-0.075	0	0	43	0	0	0	0	0	0	2019-02-14T01:00:00.000	1970-01-01T16:52:39.349	157	0	0	0	43	0	0	0	0	0	1	0.052	100	0	44	0	0	0
0	0	0	0	0	0	0	1	0	0	0	269.184	0	0	0	3.4	103.4	0	0	0	-0.075	0	0	43	0	0	0	0	0	0	2019-02-14T01:00:00.000	1970-01-01T16:52:39.349	157	0	0	0	43	0	0	0	0	0	1	0.052	100	0	44	0	0	0
0	0	0	0	0	0	0	1	0	0	0	269.184	0	0	0	3.4	103.4	0	0	0	-0.09	0	0	43	0	0	0	0	0	0	2019-02-14T01:00:00.000	1970-01-01T16:52:39.469	157	0	0	0	43	0	0	0	0	0	1	0.045	100	0	44	0	0	0
0	0	0	0	0	0	0	1	0	0	0	269.184	0	0	0	3.4	103.4	0	0	0	-0.09	0	0	43	0	0	0	0	0	0	2019-02-14T01:00:00.000	1970-01-01T16:52:39.469	157	0	0	0	43	0	0	0	0	0	1	0.045	100	0	44	0	0	0
0	0	0	0	0	0	0	1	0	0	0	269.184	0	0	0	3.4	103.4	0	0	0	-0.09	0	0	43	0	0	0	0	0	0	2019-02-14T01:00:00.000	1970-01-01T16:52:39.469	157	0	0	0	43	0	0	0	0	0	1	0.045	100	0	44	0	0	0
0	0	0	0	0	0	0	1	0	0	0	269.184	0	0	0	3.4	103.4	0	0	0	-0.09	0	0	43	0	0	0	0	0	0	2019-02-14T01:00:00.000	1970-01-01T16:52:39.469	157	0	0	0	43	0	0	0	0	0	1	0.045	100	0	44	0	0	0
0	0	0	0	0	0	0	1	0	0	0	269.184	0	0	0	3.4	103.4	0	0	0	-0.09	0	0	43	0	0	0	0	0	0	2019-02-14T01:00:00.000	1970-01-01T16:52:39.469	157	0	0	0	43	0	0	0	0	0	1	0.045	100	0	44	0	0	0
0	0	0	0	0	0	0	1	0	0	0	269.184	0	0	0	3.4	103.4	0	0	0	-0.095	0	0	43	0	0	0	0	0	0	2019-02-14T01:00:00.000	1970-01-01T16:52:39.589	157	0	0	0	43	0	0	0	0	0	1	0.037	100	0	44	0	0	0
0	0	0	0	0	0	0	1	0	0	0	269.184	0	0	0	3.4	103.4	0	0	0	-0.095	0	0	43	0	0	0	0	0	0	2019-02-14T01:00:00.000	1970-01-01T16:52:39.589	157	0	0	0	43	0	0	0	0	0	1	0.037	100	0	44	0	0	0
0	0	0	0	0	0	0	1	0	0	0	269.184	0	0	0	3.4	103.4	0	0	0	-0.095	0	0	43	0	0	0	0	0	0	2019-02-14T01:00:00.000	1970-01-01T16:52:39.589	157	0	0	0	43	0	0	0	0	0	1	0.037	100	0	44	0	0	0
0	0	0	0	0	0	0	1	0	0	0	269.184	0	0	0	3.4	103.4	0	0	0	-0.095	0	0	43	0	0	0	0	0	0	2019-02-14T01:00:00.000	1970-01-01T16:52:39.589	157	0	0	0	43	0	0	0	0	0	1	0.037	100	0	44	0	0	0
0	0	0	0	0	0	0	1	0	0	0	269.184	0	0	0	3.4	103.4	0	0	0	-0.095	0	0	43	0	0	0	0	0	0	2019-02-14T01:00:00.000	1970-01-01T16:52:39.589	157	0	0	0	43	0	0	0	0	0	1	0.037	100	0	44	0	0	0
0	0	0	0	0	0	0	1	0	0	0	269.184	0	0	0	3.4	103.4	0	0	0	-0.085	0	0	43	0	0	0	0	0	0	2019-02-14T01:00:00.000	1970-01-01T16:52:39.699	157	0	0	0	43	0	0	0	0	0	1	0.06	100	0	44	0	0	0
0	0	0	0	0	0	0	1	0	0	0	269.184	0	0	0	3.4	103.4	0	0	0	-0.085	0	0	43	0	0	0	0	0	0	2019-02-14T01:00:00.000	1970-01-01T16:52:39.699	157	0	0	0	43	0	0	0	0	0	1	0.06	100	0	44	0	0	0
0	0	0	0	0	0	0	1	0	0	0	269.184	0	0	0	3.4	103.4	0	0	0	-0.085	0	0	43	0	0	0	0	0	0	2019-02-14T01:00:00.000	1970-01-01T16:52:39.699	157	0	0	0	43	0	0	0	0	0	1	0.06	100	0	44	0	0	0
0	0	0	0	0	0	0	1	0	0	0	269.184	0	0	0	3.4	103.4	0	0	0	-0.085	0	0	43	0	0	0	0	0	0	2019-02-14T01:00:00.000	1970-01-01T16:52:39.699	157	0	0	0	43	0	0	0	0	0	1	0.06	100	0	44	0	0	0
0	0	0	0	0	0	0	1	0	0	0	269.184	0	0	0	3.4	103.4	0	0	0	-0.085	0	0	43	0	0	0	0	0	0	2019-02-14T01:00:00.000	1970-01-01T16:52:39.699	157	0	0	0	43	0	0	0	0	0	1	0.06	100	0	44	0	0	0
0	0	0	0	0	0	0	1	0	0	0	269.184	0	0	0	3.4	103.4	0	0	0	-0.085	0	0	43	0	0	0	0	0	0	2019-02-14T01:00:00.000	1970-01-01T16:52:39.819	157	0	0	0	43	0	0	0	0	0	1	0.052	100	0	44	0	0	0
0	0	0	0	0	0	0	1	0	0	0	269.184	0	0	0	3.4	103.4	0	0	0	-0.085	0	0	43	0	0	0	0	0	0	2019-02-14T01:00:00.000	1970-01-01T16:52:39.819	157	0	0	0	43	0	0	0	0	0	1	0.052	100	0	44	0	0	0
0	0	0	0	0	0	0	1	0	0	0	269.184	0	0	0	3.4	103.4	0	0	0	-0.085	0	0	43	0	0	0	0	0	0	2019-02-14T01:00:00.000	1970-01-01T16:52:39.819	157	0	0	0	43	0	0	0	0	0	1	0.052	100	0	44	0	0	0
0	0	0	0	0	0	0	1	0	0	0	269.184	0	0	0	3.4	103.4	0	0	0	-0.085	0	0	43	0	0	0	0	0	0	2019-02-14T01:00:00.000	1970-01-01T16:52:39.819	157	0	0	0	43	0	0	0	0	0	1	0.052	100	0	44	0	0	0
0	0	0	0	0	0	0	1	0	0	0	269.184	0	0	0	3.4	103.4	0	0	0	-0.085	0	0	43	0	0	0	0	0	0	2019-02-14T01:00:00.000	1970-01-01T16:52:39.819	157	0	0	0	43	0	0	0	0	0	1	0.052	100	0	44	0	0	0
0	0	0	0	0	0	0	1	0	0	0	269.184	0	0	0	3.4	103.4	0	0	0	-0.095	0	0	43	0	0	0	0	0	0	2019-02-14T01:00:00.000	1970-01-01T16:52:39.929	157	0	0	0	43	0	0	0	0	0	1	0.045	100	0	44	0	0	0
0	0	0	0	0	0	0	1	0	0	0	269.184	0	0	0	3.4	103.4	0	0	0	-0.095	0	0	43	0	0	0	0	0	0	2019-02-14T01:00:00.000	1970-01-01T16:52:39.929	157	0	0	0	43	0	0	0	0	0	1	0.045	100	0	44	0	0	0
0	0	0	0	0	0	0	1	0	0	0	269.184	0	0	0	3.4	103.4	0	0	0	-0.095	0	0	43	0	0	0	0	0	0	2019-02-14T01:00:00.000	1970-01-01T16:52:39.929	157	0	0	0	43	0	0	0	0	0	1	0.045	100	0	44	0	0	0
0	0	0	0	0	0	0	1	0	0	0	269.184	0	0	0	3.4	103.4	0	0	0	-0.095	0	0	43	0	0	0	0	0	0	2019-02-14T01:00:00.000	1970-01-01T16:52:39.929	157	0	0	0	43	0	0	0	0	0	1	0.045	100	0	44	0	0	0
0	0	0	0	0	0	0	1	0	0	0	269.184	0	0	0	3.4	103.4	0	0	0	-0.095	0	0	43	0	0	0	0	0	0	2019-02-14T01:00:00.000	1970-01-01T16:52:39.929	157	0	0	0	43	0	0	0	0	0	1	0.045	100	0	44	0	0	0
0	0	0	0	0	0	0	1	0	0	0	269.184	0	0	0	3.4	103.4	0	0	0	-0.085	0	0	43	0	0	0	0	0	0	2019-02-14T01:00:00.000	1970-01-01T16:52:40.049	157	0	0	0	43	0	0	0	0	0	1	0.052	100	0	44	0	0	0
0	0	0	0	0	0	0	1	0	0	0	269.184	0	0	0	3.4	103.4	0	0	0	-0.085	0	0	43	0	0	0	0	0	0	2019-02-14T01:00:00.000	1970-01-01T16:52:40.049	157	0	0	0	43	0	0	0	0	0	1	0.052	100	0	44	0	0	0
0	0	0	0	0	0	0	1	0	0	0	269.184	0	0	0	3.4	103.4	0	0	0	-0.085	0	0	43	0	0	0	0	0	0	2019-02-14T01:00:00.000	1970-01-01T16:52:40.049	157	0	0	0	43	0	0	0	0	0	1	0.052	100	0	44	0	0	0
0	0	0	0	0	0	0	1	0	0	0	269.184	0	0	0	3.4	103.4	0	0	0	-0.085	0	0	43	0	0	0	0	0	0	2019-02-14T01:00:00.000	1970-01-01T16:52:40.049	157	0	0	0	43	0	0	0	0	0	1	0.052	100	0	44	0	0	0
0	0	0	0	0	0	0	1	0	0	0	269.184	0	0	0	3.4	103.4	0	0	0	-0.085	0	0	43	0	0	0	0	0	0	2019-02-14T01:00:00.000	1970-01-01T16:52:40.049	157	0	0	0	43	0	0	0	0	0	1	0.052	100	0	44	0	0	0
0	0	0	0	0	0	0	1	0	0	0	269.184	0	0	0	3.4	103.4	0	0	0	-0.085	0	0	43	0	0	0	0	0	0	2019-02-14T01:00:00.000	1970-01-01T16:52:40.169	157	0	0	0	43	0	0	0	0	0	1	0.037	100	0	44	0	0	0
0	0	0	0	0	0	0	1	0	0	0	269.184	0	0	0	3.4	103.4	0	0	0	-0.085	0	0	43	0	0	0	0	0	0	2019-02-14T01:00:00.000	1970-01-01T16:52:40.169	157	0	0	0	43	0	0	0	0	0	1	0.037	100	0	44	0	0	0
0	0	0	0	0	0	0	1	0	0	0	269.184	0	0	0	3.4	103.4	0	0	0	-0.085	0	0	43	0	0	0	0	0	0	2019-02-14T01:00:00.000	1970-01-01T16:52:40.169	157	0	0	0	43	0	0	0	0	0	1	0.037	100	0	44	0	0	0
0	0	0	0	0	0	0	1	0	0	0	269.184	0	0	0	3.4	103.4	0	0	0	-0.085	0	0	43	0	0	0	0	0	0	2019-02-14T01:00:00.000	1970-01-01T16:52:40.169	157	0	0	0	43	0	0	0	0	0	1	0.037	100	0	44	0	0	0
0	0	0	0	0	0	0	1	0	0	0	269.184	0	0	0	3.4	103.4	0	0	0	-0.085	0	0	43	0	0	0	0	0	0	2019-02-14T01:00:00.000	1970-01-01T16:52:40.169	157	0	0	0	43	0	0	0	0	0	1	0.037	100	0	44	0	0	0
0	0	0	0	0	0	0	1	0	0	0	269.184	0	0	0	3.4	103.4	0	0	0	-0.085	0	0	43	0	0	0	0	0	0	2019-02-14T01:00:00.000	1970-01-01T16:52:40.289	157	0	0	0	43	0	0	0	0	0	1	0.037	100	0	44	0	0	0
0	0	0	0	0	0	0	1	0	0	0	269.184	0	0	0	3.4	103.4	0	0	0	-0.085	0	0	43	0	0	0	0	0	0	2019-02-14T01:00:00.000	1970-01-01T16:52:40.289	157	0	0	0	43	0	0	0	0	0	1	0.037	100	0	44	0	0	0
0	0	0	0	0	0	0	1	0	0	0	269.184	0	0	0	3.4	103.4	0	0	0	-0.085	0	0	43	0	0	0	0	0	0	2019-02-14T01:00:00.000	1970-01-01T16:52:40.289	157	0	0	0	43	0	0	0	0	0	1	0.037	100	0	44	0	0	0
0	0	0	0	0	0	0	1	0	0	0	269.184	0	0	0	3.4	103.4	0	0	0	-0.085	0	0	43	0	0	0	0	0	0	2019-02-14T01:00:00.000	1970-01-01T16:52:40.289	157	0	0	0	43	0	0	0	0	0	1	0.037	100	0	44	0	0	0
0	0	0	0	0	0	0	1	0	0	0	269.184	0	0	0	3.4	103.4	0	0	0	-0.085	0	0	43	0	0	0	0	0	0	2019-02-14T01:00:00.000	1970-01-01T16:52:40.289	157	0	0	0	43	0	0	0	0	0	1	0.037	100	0	44	0	0	0
0	0	0	0	0	0	0	1	0	0	0	269.184	0	0	0	3.4	103.4	0	0	0	-0.08	0	0	43	0	0	0	0	0	0	2019-02-14T01:00:00.000	1970-01-01T16:52:40.399	157	0	0	0	43	0	0	0	0	0	1	0.03	100	0	44	0	0	0
0	0	0	0	0	0	0	1	0	0	0	269.184	0	0	0	3.4	103.4	0	0	0	-0.08	0	0	43	0	0	0	0	0	0	2019-02-14T01:00:00.000	1970-01-01T16:52:40.399	157	0	0	0	43	0	0	0	0	0	1	0.03	100	0	44	0	0	0
0	0	0	0	0	0	0	1	0	0	0	269.184	0	0	0	3.4	103.4	0	0	0	-0.08	0	0	43	0	0	0	0	0	0	2019-02-14T01:00:00.000	1970-01-01T16:52:40.399	157	0	0	0	43	0	0	0	0	0	1	0.03	100	0	44	0	0	0
0	0	0	0	0	0	0	1	0	0	0	269.184	0	0	0	3.4	103.4	0	0	0	-0.08	0	0	43	0	0	0	0	0	0	2019-02-14T01:00:00.000	1970-01-01T16:52:40.399	157	0	0	0	43	0	0	0	0	0	1	0.03	100	0	44	0	0	0
0	0	0	0	0	0	0	1	0	0	0	269.184	0	0	0	3.4	103.4	0	0	0	-0.08	0	0	43	0	0	0	0	0	0	2019-02-14T01:00:00.000	1970-01-01T16:52:40.399	157	0	0	0	43	0	0	0	0	0	1	0.03	100	0	44	0	0	0
0	0	0	0	0	0	0	1	0	0	0	269.184	0	0	0	3.4	103.4	0	0	0	-0.085	0	0	43	0	0	0	0	0	0	2019-02-14T01:00:00.000	1970-01-01T16:52:40.519	157	0	0	0	43	0	0	0	0	0	1	0.045	100	0	44	0	0	0
0	0	0	0	0	0	0	1	0	0	0	269.184	0	0	0	3.4	103.4	0	0	0	-0.085	0	0	43	0	0	0	0	0	0	2019-02-14T01:00:00.000	1970-01-01T16:52:40.519	157	0	0	0	43	0	0	0	0	0	1	0.045	100	0	44	0	0	0
0	0	0	0	0	0	0	1	0	0	0	269.184	0	0	0	3.4	103.4	0	0	0	-0.085	0	0	43	0	0	0	0	0	0	2019-02-14T01:00:00.000	1970-01-01T16:52:40.519	157	0	0	0	43	0	0	0	0	0	1	0.045	100	0	44	0	0	0
0	0	0	0	0	0	0	1	0	0	0	269.184	0	0	0	3.4	103.4	0	0	0	-0.085	0	0	43	0	0	0	0	0	0	2019-02-14T01:00:00.000	1970-01-01T16:52:40.519	157	0	0	0	43	0	0	0	0	0	1	0.045	100	0	44	0	0	0
0	0	0	0	0	0	0	1	0	0	0	269.184	0	0	0	3.4	103.4	0	0	0	-0.085	0	0	43	0	0	0	0	0	0	2019-02-14T01:00:00.000	1970-01-01T16:52:40.519	157	0	0	0	43	0	0	0	0	0	1	0.045	100	0	44	0	0	0
0	0	0	0	0	0	0	1	0	0	0	269.184	0	0	0	3.4	103.4	0	0	0	-0.095	0	0	43	0	0	0	0	0	0	2019-02-14T01:00:00.000	1970-01-01T16:52:40.639	157	0	0	0	43	0	0	0	0	0	1	0.045	100	0	44	0	0	0
0	0	0	0	0	0	0	1	0	0	0	269.184	0	0	0	3.4	103.4	0	0	0	-0.095	0	0	43	0	0	0	0	0	0	2019-02-14T01:00:00.000	1970-01-01T16:52:40.639	157	0	0	0	43	0	0	0	0	0	1	0.045	100	0	44	0	0	0
0	0	0	0	0	0	0	1	0	0	0	269.184	0	0	0	3.4	103.4	0	0	0	-0.095	0	0	43	0	0	0	0	0	0	2019-02-14T01:00:00.000	1970-01-01T16:52:40.639	157	0	0	0	43	0	0	0	0	0	1	0.045	100	0	44	0	0	0
0	0	0	0	0	0	0	1	0	0	0	269.184	0	0	0	3.4	103.4	0	0	0	-0.095	0	0	43	0	0	0	0	0	0	2019-02-14T01:00:00.000	1970-01-01T16:52:40.639	157	0	0	0	43	0	0	0	0	0	1	0.045	100	0	44	0	0	0
0	0	0	0	0	0	0	1	0	0	0	269.184	0	0	0	3.4	103.4	0	0	0	-0.095	0	0	43	0	0	0	0	0	0	2019-02-14T01:00:00.000	1970-01-01T16:52:40.639	157	0	0	0	43	0	0	0	0	0	1	0.045	100	0	44	0	0	0
0	0	0	0	0	0	0	1	0	0	0	269.184	0	0	0	3.4	103.4	0	0	0	-0.085	0	0	43	0	0	0	0	0	0	2019-02-14T01:00:00.000	1970-01-01T16:52:40.759	157	0	0	0	43	0	0	0	0	0	1	0.052	100	0	44	0	0	0
0	0	0	0	0	0	0	1	0	0	0	269.184	0	0	0	3.4	103.4	0	0	0	-0.085	0	0	43	0	0	0	0	0	0	2019-02-14T01:00:00.000	1970-01-01T16:52:40.759	157	0	0	0	43	0	0	0	0	0	1	0.052	100	0	44	0	0	0
0	0	0	0	0	0	0	1	0	0	0	269.184	0	0	0	3.4	103.4	0	0	0	-0.085	0	0	43	0	0	0	0	0	0	2019-02-14T01:00:00.000	1970-01-01T16:52:40.759	157	0	0	0	43	0	0	0	0	0	1	0.052	100	0	44	0	0	0
0	0	0	0	0	0	0	1	0	0	0	269.184	0	0	0	3.4	103.4	0	0	0	-0.085	0	0	43	0	0	0	0	0	0	2019-02-14T01:00:00.000	1970-01-01T16:52:40.759	157	0	0	0	43	0	0	0	0	0	1	0.052	100	0	44	0	0	0
0	0	0	0	0	0	0	1	0	0	0	269.184	0	0	0	3.4	103.4	0	0	0	-0.085	0	0	43	0	0	0	0	0	0	2019-02-14T01:00:00.000	1970-01-01T16:52:40.759	157	0	0	0	43	0	0	0	0	0	1	0.052	100	0	44	0	0	0
0	0	0	0	0	0	0	1	0	0	0	269.184	0	0	0	3.4	103.4	0	0	0	-0.08	0	0	43	0	0	0	0	0	0	2019-02-14T01:00:00.000	1970-01-01T16:52:40.879	157	0	0	0	43	0	0	0	0	0	1	0.045	100	0	44	0	0	0
0	0	0	0	0	0	0	1	0	0	0	269.184	0	0	0	3.4	103.4	0	0	0	-0.08	0	0	43	0	0	0	0	0	0	2019-02-14T01:00:00.000	1970-01-01T16:52:40.879	157	0	0	0	43	0	0	0	0	0	1	0.045	100	0	44	0	0	0
0	0	0	0	0	0	0	1	0	0	0	269.184	0	0	0	3.4	103.4	0	0	0	-0.08	0	0	43	0	0	0	0	0	0	2019-02-14T01:00:00.000	1970-01-01T16:52:40.879	157	0	0	0	43	0	0	0	0	0	1	0.045	100	0	44	0	0	0
0	0	0	0	0	0	0	1	0	0	0	269.184	0	0	0	3.4	103.4	0	0	0	-0.08	0	0	43	0	0	0	0	0	0	2019-02-14T01:00:00.000	1970-01-01T16:52:40.879	157	0	0	0	43	0	0	0	0	0	1	0.045	100	0	44	0	0	0
0	0	0	0	0	0	0	1	0	0	0	269.184	0	0	0	3.4	103.4	0	0	0	-0.08	0	0	43	0	0	0	0	0	0	2019-02-14T01:00:00.000	1970-01-01T16:52:40.879	157	0	0	0	43	0	0	0	0	0	1	0.045	100	0	44	0	0	0
0	0	0	0	0	0	0	1	0	0	0	269.184	0	0	0	3.4	103.4	0	0	0	-0.085	0	0	43	0	0	0	0	0	0	2019-02-14T01:00:00.000	1970-01-01T16:52:40.989	157	0	0	0	43	0	0	0	0	0	1	0.037	100	0	44	0	0	0
0	0	0	0	0	0	0	1	0	0	0	269.184	0	0	0	3.4	103.4	0	0	0	-0.085	0	0	43	0	0	0	0	0	0	2019-02-14T01:00:00.000	1970-01-01T16:52:40.989	157	0	0	0	43	0	0	0	0	0	1	0.037	100	0	44	0	0	0
0	0	0	0	0	0	0	1	0	0	0	269.184	0	0	0	3.4	103.4	0	0	0	-0.085	0	0	43	0	0	0	0	0	0	2019-02-14T01:00:00.000	1970-01-01T16:52:40.989	157	0	0	0	43	0	0	0	0	0	1	0.037	100	0	44	0	0	0
0	0	0	0	0	0	0	1	0	0	0	269.184	0	0	0	3.4	103.4	0	0	0	-0.085	0	0	43	0	0	0	0	0	0	2019-02-14T01:00:00.000	1970-01-01T16:52:40.989	157	0	0	0	43	0	0	0	0	0	1	0.037	100	0	44	0	0	0
0	0	0	0	0	0	0	1	0	0	0	269.184	0	0	0	3.4	103.4	0	0	0	-0.085	0	0	43	0	0	0	0	0	0	2019-02-14T01:00:00.000	1970-01-01T16:52:40.989	157	0	0	0	43	0	0	0	0	0	1	0.037	100	0	44	0	0	0
0	0	0	0	0	0	0	1	0	0	0	269.184	0	0	0	3.4	103.4	0	0	0	-0.09	0	0	43	0	0	0	0	0	0	2019-02-14T01:00:00.000	1970-01-01T16:52:41.119	157	0	0	0	43	0	0	0	0	0	1	0.037	100	0	44	0	0	0
0	0	0	0	0	0	0	1	0	0	0	269.184	0	0	0	3.4	103.4	0	0	0	-0.09	0	0	43	0	0	0	0	0	0	2019-02-14T01:00:00.000	1970-01-01T16:52:41.119	157	0	0	0	43	0	0	0	0	0	1	0.037	100	0	44	0	0	0
0	0	0	0	0	0	0	1	0	0	0	269.184	0	0	0	3.4	103.4	0	0	0	-0.09	0	0	43	0	0	0	0	0	0	2019-02-14T01:00:00.000	1970-01-01T16:52:41.119	157	0	0	0	43	0	0	0	0	0	1	0.037	100	0	44	0	0	0
0	0	0	0	0	0	0	1	0	0	0	269.184	0	0	0	3.4	103.4	0	0	0	-0.09	0	0	43	0	0	0	0	0	0	2019-02-14T01:00:00.000	1970-01-01T16:52:41.119	157	0	0	0	43	0	0	0	0	0	1	0.037	100	0	44	0	0	0
0	0	0	0	0	0	0	1	0	0	0	269.184	0	0	0	3.4	103.4	0	0	0	-0.09	0	0	43	0	0	0	0	0	0	2019-02-14T01:00:00.000	1970-01-01T16:52:41.119	157	0	0	0	43	0	0	0	0	0	1	0.037	100	0	44	0	0	0
0	0	0	0	0	0	0	1	0	0	0	269.184	0	0	0	3.4	103.4	0	0	0	-0.075	0	0	43	0	0	0	0	0	0	2019-02-14T01:00:00.000	1970-01-01T16:52:41.229	157	0	0	0	43	0	0	0	0	0	1	0.037	100	0	44	0	0	0
0	0	0	0	0	0	0	1	0	0	0	269.184	0	0	0	3.4	103.4	0	0	0	-0.075	0	0	43	0	0	0	0	0	0	2019-02-14T01:00:00.000	1970-01-01T16:52:41.229	157	0	0	0	43	0	0	0	0	0	1	0.037	100	0	44	0	0	0
0	0	0	0	0	0	0	1	0	0	0	269.184	0	0	0	3.4	103.4	0	0	0	-0.075	0	0	43	0	0	0	0	0	0	2019-02-14T01:00:00.000	1970-01-01T16:52:41.229	157	0	0	0	43	0	0	0	0	0	1	0.037	100	0	44	0	0	0
0	0	0	0	0	0	0	1	0	0	0	269.184	0	0	0	3.4	103.4	0	0	0	-0.075	0	0	43	0	0	0	0	0	0	2019-02-14T01:00:00.000	1970-01-01T16:52:41.229	157	0	0	0	43	0	0	0	0	0	1	0.037	100	0	44	0	0	0
0	0	0	0	0	0	0	1	0	0	0	269.184	0	0	0	3.4	103.4	0	0	0	-0.075	0	0	43	0	0	0	0	0	0	2019-02-14T01:00:00.000	1970-01-01T16:52:41.229	157	0	0	0	43	0	0	0	0	0	1	0.037	100	0	44	0	0	0
0	0	0	0	0	0	0	1	0	0	0	269.184	0	0	0	3.4	103.4	0	0	0	-0.085	0	0	43	0	0	0	0	0	0	2019-02-14T01:00:00.000	1970-01-01T16:52:41.349	157	0	0	0	43	0	0	0	0	0	1	0.037	100	0	44	0	0	0
0	0	0	0	0	0	0	1	0	0	0	269.184	0	0	0	3.4	103.4	0	0	0	-0.085	0	0	43	0	0	0	0	0	0	2019-02-14T01:00:00.000	1970-01-01T16:52:41.349	157	0	0	0	43	0	0	0	0	0	1	0.037	100	0	44	0	0	0
0	0	0	0	0	0	0	1	0	0	0	269.184	0	0	0	3.4	103.4	0	0	0	-0.085	0	0	43	0	0	0	0	0	0	2019-02-14T01:00:00.000	1970-01-01T16:52:41.349	157	0	0	0	43	0	0	0	0	0	1	0.037	100	0	44	0	0	0
0	0	0	0	0	0	0	1	0	0	0	269.184	0	0	0	3.4	103.4	0	0	0	-0.085	0	0	43	0	0	0	0	0	0	2019-02-14T01:00:00.000	1970-01-01T16:52:41.349	157	0	0	0	43	0	0	0	0	0	1	0.037	100	0	44	0	0	0
0	0	0	0	0	0	0	1	0	0	0	269.184	0	0	0	3.4	103.4	0	0	0	-0.085	0	0	43	0	0	0	0	0	0	2019-02-14T01:00:00.000	1970-01-01T16:52:41.349	157	0	0	0	43	0	0	0	0	0	1	0.037	100	0	44	0	0	0
0	0	0	0	0	0	0	1	0	0	0	269.184	0	0	0	3.4	103.4	0	0	0	-0.095	0	0	43	0	0	0	0	0	0	2019-02-14T01:00:00.000	1970-01-01T16:52:41.469	157	0	0	0	43	0	0	0	0	0	1	0.037	100	0	44	0	0	0
0	0	0	0	0	0	0	1	0	0	0	269.184	0	0	0	3.4	103.4	0	0	0	-0.095	0	0	43	0	0	0	0	0	0	2019-02-14T01:00:00.000	1970-01-01T16:52:41.469	157	0	0	0	43	0	0	0	0	0	1	0.037	100	0	44	0	0	0
0	0	0	0	0	0	0	1	0	0	0	269.184	0	0	0	3.4	103.4	0	0	0	-0.095	0	0	43	0	0	0	0	0	0	2019-02-14T01:00:00.000	1970-01-01T16:52:41.469	157	0	0	0	43	0	0	0	0	0	1	0.037	100	0	44	0	0	0
0	0	0	0	0	0	0	1	0	0	0	269.184	0	0	0	3.4	103.4	0	0	0	-0.095	0	0	43	0	0	0	0	0	0	2019-02-14T01:00:00.000	1970-01-01T16:52:41.469	157	0	0	0	43	0	0	0	0	0	1	0.037	100	0	44	0	0	0
0	0	0	0	0	0	0	1	0	0	0	269.184	0	0	0	3.4	103.4	0	0	0	-0.095	0	0	43	0	0	0	0	0	0	2019-02-14T01:00:00.000	1970-01-01T16:52:41.469	157	0	0	0	43	0	0	0	0	0	1	0.037	100	0	44	0	0	0
0	0	0	0	0	0	0	1	0	0	0	269.184	0	0	0	3.4	103.4	0	0	0	-0.08	0	0	43	0	0	0	0	0	0	2019-02-14T01:00:00.000	1970-01-01T16:52:41.799	157	0	0	0	43	0	0	0	0	0	1	0.045	100	0	44	0	0	0
0	0	0	0	0	0	0	1	0	0	0	269.184	0	0	0	3.4	103.4	0	0	0	-0.08	0	0	43	0	0	0	0	0	0	2019-02-14T01:00:00.000	1970-01-01T16:52:41.799	157	0	0	0	43	0	0	0	0	0	1	0.045	100	0	44	0	0	0
0	0	0	0	0	0	0	1	0	0	0	269.184	0	0	0	3.4	103.4	0	0	0	-0.08	0	0	43	0	0	0	0	0	0	2019-02-14T01:00:00.000	1970-01-01T16:52:41.799	157	0	0	0	43	0	0	0	0	0	1	0.045	100	0	44	0	0	0
0	0	0	0	0	0	0	1	0	0	0	269.184	0	0	0	3.4	103.4	0	0	0	-0.08	0	0	43	0	0	0	0	0	0	2019-02-14T01:00:00.000	1970-01-01T16:52:41.799	157	0	0	0	43	0	0	0	0	0	1	0.045	100	0	44	0	0	0
0	0	0	0	0	0	0	1	0	0	0	269.184	0	0	0	3.4	103.4	0	0	0	-0.08	0	0	43	0	0	0	0	0	0	2019-02-14T01:00:00.000	1970-01-01T16:52:41.799	157	0	0	0	43	0	0	0	0	0	1	0.045	100	0	44	0	0	0
0	0	0	0	0	0	0	1	0	0	0	269.184	0	0	0	3.4	103.4	0	0	0	-0.09	0	0	43	0	0	0	0	0	0	2019-02-14T01:00:00.000	1970-01-01T16:52:41.919	157	0	0	0	43	0	0	0	0	0	1	0.045	100	0	44	0	0	0
0	0	0	0	0	0	0	1	0	0	0	269.184	0	0	0	3.4	103.4	0	0	0	-0.09	0	0	43	0	0	0	0	0	0	2019-02-14T01:00:00.000	1970-01-01T16:52:41.919	157	0	0	0	43	0	0	0	0	0	1	0.045	100	0	44	0	0	0
0	0	0	0	0	0	0	1	0	0	0	269.184	0	0	0	3.4	103.4	0	0	0	-0.09	0	0	43	0	0	0	0	0	0	2019-02-14T01:00:00.000	1970-01-01T16:52:41.919	157	0	0	0	43	0	0	0	0	0	1	0.045	100	0	44	0	0	0
0	0	0	0	0	0	0	1	0	0	0	269.184	0	0	0	3.4	103.4	0	0	0	-0.09	0	0	43	0	0	0	0	0	0	2019-02-14T01:00:00.000	1970-01-01T16:52:41.919	157	0	0	0	43	0	0	0	0	0	1	0.045	100	0	44	0	0	0
0	0	0	0	0	0	0	1	0	0	0	269.184	0	0	0	3.4	103.4	0	0	0	-0.09	0	0	43	0	0	0	0	0	0	2019-02-14T01:00:00.000	1970-01-01T16:52:41.919	157	0	0	0	43	0	0	0	0	0	1	0.045	100	0	44	0	0	0
0	0	0	0	0	0	0	1	0	0	0	269.184	0	0	0	3.4	103.4	0	0	0	-0.09	0	0	43	0	0	0	0	0	0	2019-02-14T01:00:00.000	1970-01-01T16:52:42.029	157	0	0	0	43	0	0	0	0	0	1	0.037	100	0	44	0	0	0
0	0	0	0	0	0	0	1	0	0	0	269.184	0	0	0	3.4	103.4	0	0	0	-0.09	0	0	43	0	0	0	0	0	0	2019-02-14T01:00:00.000	1970-01-01T16:52:42.029	157	0	0	0	43	0	0	0	0	0	1	0.037	100	0	44	0	0	0
0	0	0	0	0	0	0	1	0	0	0	269.184	0	0	0	3.4	103.4	0	0	0	-0.09	0	0	43	0	0	0	0	0	0	2019-02-14T01:00:00.000	1970-01-01T16:52:42.029	157	0	0	0	43	0	0	0	0	0	1	0.037	100	0	44	0	0	0
0	0	0	0	0	0	0	1	0	0	0	269.184	0	0	0	3.4	103.4	0	0	0	-0.09	0	0	43	0	0	0	0	0	0	2019-02-14T01:00:00.000	1970-01-01T16:52:42.029	157	0	0	0	43	0	0	0	0	0	1	0.037	100	0	44	0	0	0
0	0	0	0	0	0	0	1	0	0	0	269.184	0	0	0	3.4	103.4	0	0	0	-0.09	0	0	43	0	0	0	0	0	0	2019-02-14T01:00:00.000	1970-01-01T16:52:42.029	157	0	0	0	43	0	0	0	0	0	1	0.037	100	0	44	0	0	0
0	0	0	0	0	0	0	1	0	0	0	269.184	0	0	0	3.4	103.4	0	0	0	-0.095	0	0	43	0	0	0	0	0	0	2019-02-14T01:00:00.000	1970-01-01T16:52:42.149	157	0	0	0	43	0	0	0	0	0	1	0.03	100	0	44	0	0	0
0	0	0	0	0	0	0	1	0	0	0	269.184	0	0	0	3.4	103.4	0	0	0	-0.095	0	0	43	0	0	0	0	0	0	2019-02-14T01:00:00.000	1970-01-01T16:52:42.149	157	0	0	0	43	0	0	0	0	0	1	0.03	100	0	44	0	0	0
0	0	0	0	0	0	0	1	0	0	0	269.184	0	0	0	3.4	103.4	0	0	0	-0.095	0	0	43	0	0	0	0	0	0	2019-02-14T01:00:00.000	1970-01-01T16:52:42.149	157	0	0	0	43	0	0	0	0	0	1	0.03	100	0	44	0	0	0
0	0	0	0	0	0	0	1	0	0	0	269.184	0	0	0	3.4	103.4	0	0	0	-0.095	0	0	43	0	0	0	0	0	0	2019-02-14T01:00:00.000	1970-01-01T16:52:42.149	157	0	0	0	43	0	0	0	0	0	1	0.03	100	0	44	0	0	0
0	0	0	0	0	0	0	1	0	0	0	269.184	0	0	0	3.4	103.4	0	0	0	-0.095	0	0	43	0	0	0	0	0	0	2019-02-14T01:00:00.000	1970-01-01T16:52:42.149	157	0	0	0	43	0	0	0	0	0	1	0.03	100	0	44	0	0	0
0	0	0	0	0	0	0	1	0	0	0	269.184	0	0	0	3.4	103.4	0	0	0	-0.08	0	0	43	0	0	0	0	0	0	2019-02-14T01:00:00.000	1970-01-01T16:52:42.269	157	0	0	0	43	0	0	0	0	0	1	0.045	100	0	44	0	0	0
0	0	0	0	0	0	0	1	0	0	0	269.184	0	0	0	3.4	103.4	0	0	0	-0.08	0	0	43	0	0	0	0	0	0	2019-02-14T01:00:00.000	1970-01-01T16:52:42.269	157	0	0	0	43	0	0	0	0	0	1	0.045	100	0	44	0	0	0
0	0	0	0	0	0	0	1	0	0	0	269.184	0	0	0	3.4	103.4	0	0	0	-0.08	0	0	43	0	0	0	0	0	0	2019-02-14T01:00:00.000	1970-01-01T16:52:42.269	157	0	0	0	43	0	0	0	0	0	1	0.045	100	0	44	0	0	0
0	0	0	0	0	0	0	1	0	0	0	269.184	0	0	0	3.4	103.4	0	0	0	-0.08	0	0	43	0	0	0	0	0	0	2019-02-14T01:00:00.000	1970-01-01T16:52:42.269	157	0	0	0	43	0	0	0	0	0	1	0.045	100	0	44	0	0	0
0	0	0	0	0	0	0	1	0	0	0	269.184	0	0	0	3.4	103.4	0	0	0	-0.08	0	0	43	0	0	0	0	0	0	2019-02-14T01:00:00.000	1970-01-01T16:52:42.269	157	0	0	0	43	0	0	0	0	0	1	0.045	100	0	44	0	0	0
0	0	0	0	0	0	0	1	0	0	0	269.184	0	0	0	3.4	103.4	0	0	0	-0.085	0	0	43	0	0	0	0	0	0	2019-02-14T01:00:00.000	1970-01-01T16:52:42.389	157	0	0	0	43	0	0	0	0	0	1	0.037	100	0	44	0	0	0
0	0	0	0	0	0	0	1	0	0	0	269.184	0	0	0	3.4	103.4	0	0	0	-0.085	0	0	43	0	0	0	0	0	0	2019-02-14T01:00:00.000	1970-01-01T16:52:42.389	157	0	0	0	43	0	0	0	0	0	1	0.037	100	0	44	0	0	0
0	0	0	0	0	0	0	1	0	0	0	269.184	0	0	0	3.4	103.4	0	0	0	-0.085	0	0	43	0	0	0	0	0	0	2019-02-14T01:00:00.000	1970-01-01T16:52:42.389	157	0	0	0	43	0	0	0	0	0	1	0.037	100	0	44	0	0	0
0	0	0	0	0	0	0	1	0	0	0	269.184	0	0	0	3.4	103.4	0	0	0	-0.085	0	0	43	0	0	0	0	0	0	2019-02-14T01:00:00.000	1970-01-01T16:52:42.389	157	0	0	0	43	0	0	0	0	0	1	0.037	100	0	44	0	0	0
0	0	0	0	0	0	0	1	0	0	0	269.184	0	0	0	3.4	103.4	0	0	0	-0.085	0	0	43	0	0	0	0	0	0	2019-02-14T01:00:00.000	1970-01-01T16:52:42.389	157	0	0	0	43	0	0	0	0	0	1	0.037	100	0	44	0	0	0
0	0	0	0	0	0	0	1	0	0	0	269.184	0	0	0	3.4	103.4	0	0	0	-0.085	0	0	43	0	0	0	0	0	0	2019-02-14T01:00:00.000	1970-01-01T16:52:42.509	157	0	0	0	43	0	0	0	0	0	1	0.045	100	0	44	0	0	0
0	0	0	0	0	0	0	1	0	0	0	269.184	0	0	0	3.4	103.4	0	0	0	-0.085	0	0	43	0	0	0	0	0	0	2019-02-14T01:00:00.000	1970-01-01T16:52:42.509	157	0	0	0	43	0	0	0	0	0	1	0.045	100	0	44	0	0	0
0	0	0	0	0	0	0	1	0	0	0	269.184	0	0	0	3.4	103.4	0	0	0	-0.085	0	0	43	0	0	0	0	0	0	2019-02-14T01:00:00.000	1970-01-01T16:52:42.509	157	0	0	0	43	0	0	0	0	0	1	0.045	100	0	44	0	0	0
0	0	0	0	0	0	0	1	0	0	0	269.184	0	0	0	3.4	103.4	0	0	0	-0.085	0	0	43	0	0	0	0	0	0	2019-02-14T01:00:00.000	1970-01-01T16:52:42.509	157	0	0	0	43	0	0	0	0	0	1	0.045	100	0	44	0	0	0
0	0	0	0	0	0	0	1	0	0	0	269.184	0	0	0	3.4	103.4	0	0	0	-0.085	0	0	43	0	0	0	0	0	0	2019-02-14T01:00:00.000	1970-01-01T16:52:42.509	157	0	0	0	43	0	0	0	0	0	1	0.045	100	0	44	0	0	0
0	0	0	0	0	0	0	1	0	0	0	269.184	0	0	0	3.4	103.4	0	0	0	-0.095	0	0	43	0	0	0	0	0	0	2019-02-14T01:00:00.000	1970-01-01T16:52:42.629	157	0	0	0	43	0	0	0	0	0	1	0.03	100	0	44	0	0	0
0	0	0	0	0	0	0	1	0	0	0	269.184	0	0	0	3.4	103.4	0	0	0	-0.095	0	0	43	0	0	0	0	0	0	2019-02-14T01:00:00.000	1970-01-01T16:52:42.629	157	0	0	0	43	0	0	0	0	0	1	0.03	100	0	44	0	0	0
0	0	0	0	0	0	0	1	0	0	0	269.184	0	0	0	3.4	103.4	0	0	0	-0.095	0	0	43	0	0	0	0	0	0	2019-02-14T01:00:00.000	1970-01-01T16:52:42.629	157	0	0	0	43	0	0	0	0	0	1	0.03	100	0	44	0	0	0
0	0	0	0	0	0	0	1	0	0	0	269.184	0	0	0	3.4	103.4	0	0	0	-0.095	0	0	43	0	0	0	0	0	0	2019-02-14T01:00:00.000	1970-01-01T16:52:42.629	157	0	0	0	43	0	0	0	0	0	1	0.03	100	0	44	0	0	0
0	0	0	0	0	0	0	1	0	0	0	269.184	0	0	0	3.4	103.4	0	0	0	-0.095	0	0	43	0	0	0	0	0	0	2019-02-14T01:00:00.000	1970-01-01T16:52:42.629	157	0	0	0	43	0	0	0	0	0	1	0.03	100	0	44	0	0	0
0	0	0	0	0	0	0	1	0	0	0	269.184	0	0	0	3.4	103.4	0	0	0	-0.09	0	0	43	0	0	0	0	0	0	2019-02-14T01:00:00.000	1970-01-01T16:52:42.739	157	0	0	0	43	0	0	0	0	0	1	0.037	100	0	44	0	0	0
0	0	0	0	0	0	0	1	0	0	0	269.184	0	0	0	3.4	103.4	0	0	0	-0.09	0	0	43	0	0	0	0	0	0	2019-02-14T01:00:00.000	1970-01-01T16:52:42.739	157	0	0	0	43	0	0	0	0	0	1	0.037	100	0	44	0	0	0
0	0	0	0	0	0	0	1	0	0	0	269.184	0	0	0	3.4	103.4	0	0	0	-0.09	0	0	43	0	0	0	0	0	0	2019-02-14T01:00:00.000	1970-01-01T16:52:42.739	157	0	0	0	43	0	0	0	0	0	1	0.037	100	0	44	0	0	0
0	0	0	0	0	0	0	1	0	0	0	269.184	0	0	0	3.4	103.4	0	0	0	-0.09	0	0	43	0	0	0	0	0	0	2019-02-14T01:00:00.000	1970-01-01T16:52:42.739	157	0	0	0	43	0	0	0	0	0	1	0.037	100	0	44	0	0	0
0	0	0	0	0	0	0	1	0	0	0	269.184	0	0	0	3.4	103.4	0	0	0	-0.09	0	0	43	0	0	0	0	0	0	2019-02-14T01:00:00.000	1970-01-01T16:52:42.739	157	0	0	0	43	0	0	0	0	0	1	0.037	100	0	44	0	0	0
0	0	0	0	0	0	0	1	0	0	0	269.184	0	0	0	3.4	103.4	0	0	0	-0.095	0	0	43	0	0	0	0	0	0	2019-02-14T01:00:00.000	1970-01-01T16:52:42.859	157	0	0	0	43	0	0	0	0	0	1	0.045	100	0	44	0	0	0
0	0	0	0	0	0	0	1	0	0	0	269.184	0	0	0	3.4	103.4	0	0	0	-0.095	0	0	43	0	0	0	0	0	0	2019-02-14T01:00:00.000	1970-01-01T16:52:42.859	157	0	0	0	43	0	0	0	0	0	1	0.045	100	0	44	0	0	0
0	0	0	0	0	0	0	1	0	0	0	269.184	0	0	0	3.4	103.4	0	0	0	-0.095	0	0	43	0	0	0	0	0	0	2019-02-14T01:00:00.000	1970-01-01T16:52:42.859	157	0	0	0	43	0	0	0	0	0	1	0.045	100	0	44	0	0	0
0	0	0	0	0	0	0	1	0	0	0	269.184	0	0	0	3.4	103.4	0	0	0	-0.095	0	0	43	0	0	0	0	0	0	2019-02-14T01:00:00.000	1970-01-01T16:52:42.859	157	0	0	0	43	0	0	0	0	0	1	0.045	100	0	44	0	0	0
0	0	0	0	0	0	0	1	0	0	0	269.184	0	0	0	3.4	103.4	0	0	0	-0.095	0	0	43	0	0	0	0	0	0	2019-02-14T01:00:00.000	1970-01-01T16:52:42.859	157	0	0	0	43	0	0	0	0	0	1	0.045	100	0	44	0	0	0
0	0	0	0	0	0	0	1	0	0	0	269.184	0	0	0	3.4	103.4	0	0	0	-0.08	0	0	43	0	0	0	0	0	0	2019-02-14T01:00:00.000	1970-01-01T16:52:42.979	157	0	0	0	43	0	0	0	0	0	1	0.045	100	0	44	0	0	0
0	0	0	0	0	0	0	1	0	0	0	269.184	0	0	0	3.4	103.4	0	0	0	-0.08	0	0	43	0	0	0	0	0	0	2019-02-14T01:00:00.000	1970-01-01T16:52:42.979	157	0	0	0	43	0	0	0	0	0	1	0.045	100	0	44	0	0	0
0	0	0	0	0	0	0	1	0	0	0	269.184	0	0	0	3.4	103.4	0	0	0	-0.08	0	0	43	0	0	0	0	0	0	2019-02-14T01:00:00.000	1970-01-01T16:52:42.979	157	0	0	0	43	0	0	0	0	0	1	0.045	100	0	44	0	0	0
0	0	0	0	0	0	0	1	0	0	0	269.184	0	0	0	3.4	103.4	0	0	0	-0.08	0	0	43	0	0	0	0	0	0	2019-02-14T01:00:00.000	1970-01-01T16:52:42.979	157	0	0	0	43	0	0	0	0	0	1	0.045	100	0	44	0	0	0
0	0	0	0	0	0	0	1	0	0	0	269.184	0	0	0	3.4	103.4	0	0	0	-0.08	0	0	43	0	0	0	0	0	0	2019-02-14T01:00:00.000	1970-01-01T16:52:42.979	157	0	0	0	43	0	0	0	0	0	1	0.045	100	0	44	0	0	0
0	0	0	0	0	0	0	1	0	0	0	269.184	0	0	0	3.4	103.4	0	0	0	-0.075	0	0	43	0	0	0	0	0	0	2019-02-14T01:00:00.000	1970-01-01T16:52:43.309	157	0	0	0	43	0	0	0	0	0	1	0.045	100	0	44	0	0	0
0	0	0	0	0	0	0	1	0	0	0	269.184	0	0	0	3.4	103.4	0	0	0	-0.08	0	0	43	0	0	0	0	0	0	2019-02-14T01:00:00.000	1970-01-01T16:52:43.559	157	0	0	0	43	0	0	0	0	0	1	0.037	100	0	44	0	0	0
0	0	0	0	0	0	0	1	0	0	0	269.184	0	0	0	3.4	103.4	0	0	0	-0.08	0	0	43	0	0	0	0	0	0	2019-02-14T01:00:00.000	1970-01-01T16:52:43.559	157	0	0	0	43	0	0	0	0	0	1	0.037	100	0	44	0	0	0
0	0	0	0	0	0	0	1	0	0	0	269.184	0	0	0	3.4	103.4	0	0	0	-0.08	0	0	43	0	0	0	0	0	0	2019-02-14T01:00:00.000	1970-01-01T16:52:43.559	157	0	0	0	43	0	0	0	0	0	1	0.037	100	0	44	0	0	0
0	0	0	0	0	0	0	1	0	0	0	269.184	0	0	0	3.4	103.4	0	0	0	-0.08	0	0	43	0	0	0	0	0	0	2019-02-14T01:00:00.000	1970-01-01T16:52:43.559	157	0	0	0	43	0	0	0	0	0	1	0.037	100	0	44	0	0	0
0	0	0	0	0	0	0	1	0	0	0	269.184	0	0	0	3.4	103.4	0	0	0	-0.08	0	0	43	0	0	0	0	0	0	2019-02-14T01:00:00.000	1970-01-01T16:52:43.559	157	0	0	0	43	0	0	0	0	0	1	0.037	100	0	44	0	0	0
0	0	0	0	0	0	0	1	0	0	0	269.184	0	0	0	3.4	103.4	0	0	0	-0.09	0	0	43	0	0	0	0	0	0	2019-02-14T01:00:00.000	1970-01-01T16:52:43.679	157	0	0	0	43	0	0	0	0	0	1	0.045	100	0	44	0	0	0
0	0	0	0	0	0	0	1	0	0	0	269.184	0	0	0	3.4	103.4	0	0	0	-0.09	0	0	43	0	0	0	0	0	0	2019-02-14T01:00:00.000	1970-01-01T16:52:43.679	157	0	0	0	43	0	0	0	0	0	1	0.045	100	0	44	0	0	0
0	0	0	0	0	0	0	1	0	0	0	269.184	0	0	0	3.4	103.4	0	0	0	-0.09	0	0	43	0	0	0	0	0	0	2019-02-14T01:00:00.000	1970-01-01T16:52:43.679	157	0	0	0	43	0	0	0	0	0	1	0.045	100	0	44	0	0	0
0	0	0	0	0	0	0	1	0	0	0	269.184	0	0	0	3.4	103.4	0	0	0	-0.09	0	0	43	0	0	0	0	0	0	2019-02-14T01:00:00.000	1970-01-01T16:52:43.679	157	0	0	0	43	0	0	0	0	0	1	0.045	100	0	44	0	0	0
0	0	0	0	0	0	0	1	0	0	0	269.184	0	0	0	3.4	103.4	0	0	0	-0.09	0	0	43	0	0	0	0	0	0	2019-02-14T01:00:00.000	1970-01-01T16:52:43.679	157	0	0	0	43	0	0	0	0	0	1	0.045	100	0	44	0	0	0
0	0	0	0	0	0	0	1	0	0	0	269.184	0	0	0	3.4	103.4	0	0	0	-0.08	0	0	43	0	0	0	0	0	0	2019-02-14T01:00:00.000	1970-01-01T16:52:43.799	157	0	0	0	43	0	0	0	0	0	1	0.045	100	0	44	0	0	0
0	0	0	0	0	0	0	1	0	0	0	269.184	0	0	0	3.4	103.4	0	0	0	-0.08	0	0	43	0	0	0	0	0	0	2019-02-14T01:00:00.000	1970-01-01T16:52:43.799	157	0	0	0	43	0	0	0	0	0	1	0.045	100	0	44	0	0	0
0	0	0	0	0	0	0	1	0	0	0	269.184	0	0	0	3.4	103.4	0	0	0	-0.08	0	0	43	0	0	0	0	0	0	2019-02-14T01:00:00.000	1970-01-01T16:52:43.799	157	0	0	0	43	0	0	0	0	0	1	0.045	100	0	44	0	0	0
0	0	0	0	0	0	0	1	0	0	0	269.184	0	0	0	3.4	103.4	0	0	0	-0.08	0	0	43	0	0	0	0	0	0	2019-02-14T01:00:00.000	1970-01-01T16:52:43.799	157	0	0	0	43	0	0	0	0	0	1	0.045	100	0	44	0	0	0
0	0	0	0	0	0	0	1	0	0	0	269.184	0	0	0	3.4	103.4	0	0	0	-0.08	0	0	43	0	0	0	0	0	0	2019-02-14T01:00:00.000	1970-01-01T16:52:43.799	157	0	0	0	43	0	0	0	0	0	1	0.045	100	0	44	0	0	0
0	0	0	0	0	0	0	1	0	0	0	269.184	0	0	0	3.4	103.4	0	0	0	-0.08	0	0	43	0	0	0	0	0	0	2019-02-14T01:00:00.000	1970-01-01T16:52:43.909	157	0	0	0	43	0	0	0	0	0	1	0.045	100	0	44	0	0	0
0	0	0	0	0	0	0	1	0	0	0	269.184	0	0	0	3.4	103.4	0	0	0	-0.08	0	0	43	0	0	0	0	0	0	2019-02-14T01:00:00.000	1970-01-01T16:52:43.909	157	0	0	0	43	0	0	0	0	0	1	0.045	100	0	44	0	0	0
0	0	0	0	0	0	0	1	0	0	0	269.184	0	0	0	3.4	103.4	0	0	0	-0.08	0	0	43	0	0	0	0	0	0	2019-02-14T01:00:00.000	1970-01-01T16:52:43.909	157	0	0	0	43	0	0	0	0	0	1	0.045	100	0	44	0	0	0
0	0	0	0	0	0	0	1	0	0	0	269.184	0	0	0	3.4	103.4	0	0	0	-0.08	0	0	43	0	0	0	0	0	0	2019-02-14T01:00:00.000	1970-01-01T16:52:43.909	157	0	0	0	43	0	0	0	0	0	1	0.045	100	0	44	0	0	0
0	0	0	0	0	0	0	1	0	0	0	269.184	0	0	0	3.4	103.4	0	0	0	-0.08	0	0	43	0	0	0	0	0	0	2019-02-14T01:00:00.000	1970-01-01T16:52:43.909	157	0	0	0	43	0	0	0	0	0	1	0.045	100	0	44	0	0	0
0	0	0	0	0	0	0	1	0	0	0	269.184	0	0	0	3.4	103.4	0	0	0	-0.085	0	0	43	0	0	0	0	0	0	2019-02-14T01:00:00.000	1970-01-01T16:52:44.029	157	0	0	0	43	0	0	0	0	0	1	0.037	100	0	44	0	0	0
0	0	0	0	0	0	0	1	0	0	0	269.184	0	0	0	3.4	103.4	0	0	0	-0.085	0	0	43	0	0	0	0	0	0	2019-02-14T01:00:00.000	1970-01-01T16:52:44.029	157	0	0	0	43	0	0	0	0	0	1	0.037	100	0	44	0	0	0
0	0	0	0	0	0	0	1	0	0	0	269.184	0	0	0	3.4	103.4	0	0	0	-0.085	0	0	43	0	0	0	0	0	0	2019-02-14T01:00:00.000	1970-01-01T16:52:44.029	157	0	0	0	43	0	0	0	0	0	1	0.037	100	0	44	0	0	0
0	0	0	0	0	0	0	1	0	0	0	269.184	0	0	0	3.4	103.4	0	0	0	-0.085	0	0	43	0	0	0	0	0	0	2019-02-14T01:00:00.000	1970-01-01T16:52:44.029	157	0	0	0	43	0	0	0	0	0	1	0.037	100	0	44	0	0	0
0	0	0	0	0	0	0	1	0	0	0	269.184	0	0	0	3.4	103.4	0	0	0	-0.085	0	0	43	0	0	0	0	0	0	2019-02-14T01:00:00.000	1970-01-01T16:52:44.029	157	0	0	0	43	0	0	0	0	0	1	0.037	100	0	44	0	0	0
0	0	0	0	0	0	0	1	0	0	0	269.184	0	0	0	3.4	103.4	0	0	0	-0.09	0	0	43	0	0	0	0	0	0	2019-02-14T01:00:00.000	1970-01-01T16:52:44.149	157	0	0	0	43	0	0	0	0	0	1	0.045	100	0	44	0	0	0
0	0	0	0	0	0	0	1	0	0	0	269.184	0	0	0	3.4	103.4	0	0	0	-0.09	0	0	43	0	0	0	0	0	0	2019-02-14T01:00:00.000	1970-01-01T16:52:44.149	157	0	0	0	43	0	0	0	0	0	1	0.045	100	0	44	0	0	0
0	0	0	0	0	0	0	1	0	0	0	269.184	0	0	0	3.4	103.4	0	0	0	-0.09	0	0	43	0	0	0	0	0	0	2019-02-14T01:00:00.000	1970-01-01T16:52:44.149	157	0	0	0	43	0	0	0	0	0	1	0.045	100	0	44	0	0	0
0	0	0	0	0	0	0	1	0	0	0	269.184	0	0	0	3.4	103.4	0	0	0	-0.09	0	0	43	0	0	0	0	0	0	2019-02-14T01:00:00.000	1970-01-01T16:52:44.149	157	0	0	0	43	0	0	0	0	0	1	0.045	100	0	44	0	0	0
0	0	0	0	0	0	0	1	0	0	0	269.184	0	0	0	3.4	103.4	0	0	0	-0.09	0	0	43	0	0	0	0	0	0	2019-02-14T01:00:00.000	1970-01-01T16:52:44.149	157	0	0	0	43	0	0	0	0	0	1	0.045	100	0	44	0	0	0
0	0	0	0	0	0	0	1	0	0	0	269.184	0	0	0	3.4	103.4	0	0	0	-0.09	0	0	43	0	0	0	0	0	0	2019-02-14T01:00:00.000	1970-01-01T16:52:44.259	157	0	0	0	43	0	0	0	0	0	1	0.045	100	0	44	0	0	0
0	0	0	0	0	0	0	1	0	0	0	269.184	0	0	0	3.4	103.4	0	0	0	-0.09	0	0	43	0	0	0	0	0	0	2019-02-14T01:00:00.000	1970-01-01T16:52:44.259	157	0	0	0	43	0	0	0	0	0	1	0.045	100	0	44	0	0	0
0	0	0	0	0	0	0	1	0	0	0	269.184	0	0	0	3.4	103.4	0	0	0	-0.09	0	0	43	0	0	0	0	0	0	2019-02-14T01:00:00.000	1970-01-01T16:52:44.259	157	0	0	0	43	0	0	0	0	0	1	0.045	100	0	44	0	0	0
0	0	0	0	0	0	0	1	0	0	0	269.184	0	0	0	3.4	103.4	0	0	0	-0.09	0	0	43	0	0	0	0	0	0	2019-02-14T01:00:00.000	1970-01-01T16:52:44.259	157	0	0	0	43	0	0	0	0	0	1	0.045	100	0	44	0	0	0
0	0	0	0	0	0	0	1	0	0	0	269.184	0	0	0	3.4	103.4	0	0	0	-0.09	0	0	43	0	0	0	0	0	0	2019-02-14T01:00:00.000	1970-01-01T16:52:44.259	157	0	0	0	43	0	0	0	0	0	1	0.045	100	0	44	0	0	0
0	0	0	0	0	0	0	1	0	0	0	269.184	0	0	0	3.4	103.4	0	0	0	-0.095	0	0	43	0	0	0	0	0	0	2019-02-14T01:00:00.000	1970-01-01T16:52:44.379	157	0	0	0	43	0	0	0	0	0	1	0.045	100	0	44	0	0	0
0	0	0	0	0	0	0	1	0	0	0	269.184	0	0	0	3.4	103.4	0	0	0	-0.095	0	0	43	0	0	0	0	0	0	2019-02-14T01:00:00.000	1970-01-01T16:52:44.379	157	0	0	0	43	0	0	0	0	0	1	0.045	100	0	44	0	0	0
0	0	0	0	0	0	0	1	0	0	0	269.184	0	0	0	3.4	103.4	0	0	0	-0.095	0	0	43	0	0	0	0	0	0	2019-02-14T01:00:00.000	1970-01-01T16:52:44.379	157	0	0	0	43	0	0	0	0	0	1	0.045	100	0	44	0	0	0
0	0	0	0	0	0	0	1	0	0	0	269.184	0	0	0	3.4	103.4	0	0	0	-0.095	0	0	43	0	0	0	0	0	0	2019-02-14T01:00:00.000	1970-01-01T16:52:44.379	157	0	0	0	43	0	0	0	0	0	1	0.045	100	0	44	0	0	0
0	0	0	0	0	0	0	1	0	0	0	269.184	0	0	0	3.4	103.4	0	0	0	-0.095	0	0	43	0	0	0	0	0	0	2019-02-14T01:00:00.000	1970-01-01T16:52:44.379	157	0	0	0	43	0	0	0	0	0	1	0.045	100	0	44	0	0	0
0	0	0	0	0	0	0	1	0	0	0	269.184	0	0	0	3.4	103.4	0	0	0	-0.09	0	0	43	0	0	0	0	0	0	2019-02-14T01:00:00.000	1970-01-01T16:52:44.499	157	0	0	0	43	0	0	0	0	0	1	0.045	100	0	44	0	0	0
0	0	0	0	0	0	0	1	0	0	0	269.184	0	0	0	3.4	103.4	0	0	0	-0.09	0	0	43	0	0	0	0	0	0	2019-02-14T01:00:00.000	1970-01-01T16:52:44.499	157	0	0	0	43	0	0	0	0	0	1	0.045	100	0	44	0	0	0
0	0	0	0	0	0	0	1	0	0	0	269.184	0	0	0	3.4	103.4	0	0	0	-0.09	0	0	43	0	0	0	0	0	0	2019-02-14T01:00:00.000	1970-01-01T16:52:44.499	157	0	0	0	43	0	0	0	0	0	1	0.045	100	0	44	0	0	0
0	0	0	0	0	0	0	1	0	0	0	269.184	0	0	0	3.4	103.4	0	0	0	-0.09	0	0	43	0	0	0	0	0	0	2019-02-14T01:00:00.000	1970-01-01T16:52:44.499	157	0	0	0	43	0	0	0	0	0	1	0.045	100	0	44	0	0	0
0	0	0	0	0	0	0	1	0	0	0	269.184	0	0	0	3.4	103.4	0	0	0	-0.09	0	0	43	0	0	0	0	0	0	2019-02-14T01:00:00.000	1970-01-01T16:52:44.499	157	0	0	0	43	0	0	0	0	0	1	0.045	100	0	44	0	0	0
0	0	0	0	0	0	0	1	0	0	0	269.184	0	0	0	3.4	103.4	0	0	0	-0.085	0	0	43	0	0	0	0	0	0	2019-02-14T01:00:00.000	1970-01-01T16:52:44.619	157	0	0	0	43	0	0	0	0	0	1	0.037	100	0	44	0	0	0
0	0	0	0	0	0	0	1	0	0	0	269.184	0	0	0	3.4	103.4	0	0	0	-0.085	0	0	43	0	0	0	0	0	0	2019-02-14T01:00:00.000	1970-01-01T16:52:44.619	157	0	0	0	43	0	0	0	0	0	1	0.037	100	0	44	0	0	0
0	0	0	0	0	0	0	1	0	0	0	269.184	0	0	0	3.4	103.4	0	0	0	-0.085	0	0	43	0	0	0	0	0	0	2019-02-14T01:00:00.000	1970-01-01T16:52:44.619	157	0	0	0	43	0	0	0	0	0	1	0.037	100	0	44	0	0	0
0	0	0	0	0	0	0	1	0	0	0	269.184	0	0	0	3.4	103.4	0	0	0	-0.085	0	0	43	0	0	0	0	0	0	2019-02-14T01:00:00.000	1970-01-01T16:52:44.619	157	0	0	0	43	0	0	0	0	0	1	0.037	100	0	44	0	0	0
0	0	0	0	0	0	0	1	0	0	0	269.184	0	0	0	3.4	103.4	0	0	0	-0.085	0	0	43	0	0	0	0	0	0	2019-02-14T01:00:00.000	1970-01-01T16:52:44.619	157	0	0	0	43	0	0	0	0	0	1	0.037	100	0	44	0	0	0
0	0	0	0	0	0	0	1	0	0	0	269.184	0	0	0	3.4	103.4	0	0	0	-0.075	0	0	43	0	0	0	0	0	0	2019-02-14T01:00:00.000	1970-01-01T16:52:44.729	157	0	0	0	43	0	0	0	0	0	1	0.037	100	0	44	0	0	0
0	0	0	0	0	0	0	1	0	0	0	269.184	0	0	0	3.4	103.4	0	0	0	-0.075	0	0	43	0	0	0	0	0	0	2019-02-14T01:00:00.000	1970-01-01T16:52:44.729	157	0	0	0	43	0	0	0	0	0	1	0.037	100	0	44	0	0	0
0	0	0	0	0	0	0	1	0	0	0	269.184	0	0	0	3.4	103.4	0	0	0	-0.075	0	0	43	0	0	0	0	0	0	2019-02-14T01:00:00.000	1970-01-01T16:52:44.729	157	0	0	0	43	0	0	0	0	0	1	0.037	100	0	44	0	0	0
0	0	0	0	0	0	0	1	0	0	0	269.184	0	0	0	3.4	103.4	0	0	0	-0.075	0	0	43	0	0	0	0	0	0	2019-02-14T01:00:00.000	1970-01-01T16:52:44.729	157	0	0	0	43	0	0	0	0	0	1	0.037	100	0	44	0	0	0
0	0	0	0	0	0	0	1	0	0	0	269.184	0	0	0	3.4	103.4	0	0	0	-0.075	0	0	43	0	0	0	0	0	0	2019-02-14T01:00:00.000	1970-01-01T16:52:44.729	157	0	0	0	43	0	0	0	0	0	1	0.037	100	0	44	0	0	0
0	0	0	0	0	0	0	1	0	0	0	269.184	0	0	0	3.4	103.4	0	0	0	-0.09	0	0	43	0	0	0	0	0	0	2019-02-14T01:00:00.000	1970-01-01T16:52:44.849	157	0	0	0	43	0	0	0	0	0	1	0.037	100	0	44	0	0	0
0	0	0	0	0	0	0	1	0	0	0	269.184	0	0	0	3.4	103.4	0	0	0	-0.09	0	0	43	0	0	0	0	0	0	2019-02-14T01:00:00.000	1970-01-01T16:52:44.849	157	0	0	0	43	0	0	0	0	0	1	0.037	100	0	44	0	0	0
0	0	0	0	0	0	0	1	0	0	0	269.184	0	0	0	3.4	103.4	0	0	0	-0.09	0	0	43	0	0	0	0	0	0	2019-02-14T01:00:00.000	1970-01-01T16:52:44.849	157	0	0	0	43	0	0	0	0	0	1	0.037	100	0	44	0	0	0
0	0	0	0	0	0	0	1	0	0	0	269.184	0	0	0	3.4	103.4	0	0	0	-0.09	0	0	43	0	0	0	0	0	0	2019-02-14T01:00:00.000	1970-01-01T16:52:44.849	157	0	0	0	43	0	0	0	0	0	1	0.037	100	0	44	0	0	0
0	0	0	0	0	0	0	1	0	0	0	269.184	0	0	0	3.4	103.4	0	0	0	-0.09	0	0	43	0	0	0	0	0	0	2019-02-14T01:00:00.000	1970-01-01T16:52:44.849	157	0	0	0	43	0	0	0	0	0	1	0.037	100	0	44	0	0	0
0	0	0	0	0	0	0	1	0	0	0	269.184	0	0	0	3.4	103.4	0	0	0	-0.08	0	0	43	0	0	0	0	0	0	2019-02-14T01:00:00.000	1970-01-01T16:52:44.969	157	0	0	0	43	0	0	0	0	0	1	0.052	100	0	44	0	0	0
0	0	0	0	0	0	0	1	0	0	0	269.184	0	0	0	3.4	103.4	0	0	0	-0.08	0	0	43	0	0	0	0	0	0	2019-02-14T01:00:00.000	1970-01-01T16:52:44.969	157	0	0	0	43	0	0	0	0	0	1	0.052	100	0	44	0	0	0
0	0	0	0	0	0	0	1	0	0	0	269.184	0	0	0	3.4	103.4	0	0	0	-0.08	0	0	43	0	0	0	0	0	0	2019-02-14T01:00:00.000	1970-01-01T16:52:44.969	157	0	0	0	43	0	0	0	0	0	1	0.052	100	0	44	0	0	0
0	0	0	0	0	0	0	1	0	0	0	269.184	0	0	0	3.4	103.4	0	0	0	-0.08	0	0	43	0	0	0	0	0	0	2019-02-14T01:00:00.000	1970-01-01T16:52:44.969	157	0	0	0	43	0	0	0	0	0	1	0.052	100	0	44	0	0	0
0	0	0	0	0	0	0	1	0	0	0	269.184	0	0	0	3.4	103.4	0	0	0	-0.08	0	0	43	0	0	0	0	0	0	2019-02-14T01:00:00.000	1970-01-01T16:52:44.969	157	0	0	0	43	0	0	0	0	0	1	0.052	100	0	44	0	0	0
0	0	0	0	0	0	0	1	0	0	0	269.184	0	0	0	3.4	103.4	0	0	0	-0.09	0	0	43	0	0	0	0	0	0	2019-02-14T01:00:00.000	1970-01-01T16:52:45.089	157	0	0	0	43	0	0	0	0	0	1	0.052	100	0	44	0	0	0
0	0	0	0	0	0	0	1	0	0	0	269.184	0	0	0	3.4	103.4	0	0	0	-0.09	0	0	43	0	0	0	0	0	0	2019-02-14T01:00:00.000	1970-01-01T16:52:45.089	157	0	0	0	43	0	0	0	0	0	1	0.052	100	0	44	0	0	0
0	0	0	0	0	0	0	1	0	0	0	269.184	0	0	0	3.4	103.4	0	0	0	-0.09	0	0	43	0	0	0	0	0	0	2019-02-14T01:00:00.000	1970-01-01T16:52:45.089	157	0	0	0	43	0	0	0	0	0	1	0.052	100	0	44	0	0	0
0	0	0	0	0	0	0	1	0	0	0	269.184	0	0	0	3.4	103.4	0	0	0	-0.09	0	0	43	0	0	0	0	0	0	2019-02-14T01:00:00.000	1970-01-01T16:52:45.089	157	0	0	0	43	0	0	0	0	0	1	0.052	100	0	44	0	0	0
0	0	0	0	0	0	0	1	0	0	0	269.184	0	0	0	3.4	103.4	0	0	0	-0.09	0	0	43	0	0	0	0	0	0	2019-02-14T01:00:00.000	1970-01-01T16:52:45.089	157	0	0	0	43	0	0	0	0	0	1	0.052	100	0	44	0	0	0
0	0	0	0	0	0	0	1	0	0	0	269.184	0	0	0	3.4	103.4	0	0	0	-0.075	0	0	43	0	0	0	0	0	0	2019-02-14T01:00:00.000	1970-01-01T16:52:45.199	157	0	0	0	43	0	0	0	0	0	1	0.045	100	0	44	0	0	0
0	0	0	0	0	0	0	1	0	0	0	269.184	0	0	0	3.4	103.4	0	0	0	-0.075	0	0	43	0	0	0	0	0	0	2019-02-14T01:00:00.000	1970-01-01T16:52:45.199	157	0	0	0	43	0	0	0	0	0	1	0.045	100	0	44	0	0	0
0	0	0	0	0	0	0	1	0	0	0	269.184	0	0	0	3.4	103.4	0	0	0	-0.075	0	0	43	0	0	0	0	0	0	2019-02-14T01:00:00.000	1970-01-01T16:52:45.199	157	0	0	0	43	0	0	0	0	0	1	0.045	100	0	44	0	0	0
0	0	0	0	0	0	0	1	0	0	0	269.184	0	0	0	3.4	103.4	0	0	0	-0.075	0	0	43	0	0	0	0	0	0	2019-02-14T01:00:00.000	1970-01-01T16:52:45.199	157	0	0	0	43	0	0	0	0	0	1	0.045	100	0	44	0	0	0
0	0	0	0	0	0	0	1	0	0	0	269.184	0	0	0	3.4	103.4	0	0	0	-0.075	0	0	43	0	0	0	0	0	0	2019-02-14T01:00:00.000	1970-01-01T16:52:45.199	157	0	0	0	43	0	0	0	0	0	1	0.045	100	0	44	0	0	0
0	0	0	0	0	0	0	1	0	0	0	269.184	0	0	0	3.4	103.4	0	0	0	-0.095	0	0	43	0	0	0	0	0	0	2019-02-14T01:00:00.000	1970-01-01T16:52:45.319	157	0	0	0	43	0	0	0	0	0	1	0.045	100	0	44	0	0	0
0	0	0	0	0	0	0	1	0	0	0	269.184	0	0	0	3.4	103.4	0	0	0	-0.095	0	0	43	0	0	0	0	0	0	2019-02-14T01:00:00.000	1970-01-01T16:52:45.319	157	0	0	0	43	0	0	0	0	0	1	0.045	100	0	44	0	0	0
0	0	0	0	0	0	0	1	0	0	0	269.184	0	0	0	3.4	103.4	0	0	0	-0.095	0	0	43	0	0	0	0	0	0	2019-02-14T01:00:00.000	1970-01-01T16:52:45.319	157	0	0	0	43	0	0	0	0	0	1	0.045	100	0	44	0	0	0
0	0	0	0	0	0	0	1	0	0	0	269.184	0	0	0	3.4	103.4	0	0	0	-0.095	0	0	43	0	0	0	0	0	0	2019-02-14T01:00:00.000	1970-01-01T16:52:45.319	157	0	0	0	43	0	0	0	0	0	1	0.045	100	0	44	0	0	0
0	0	0	0	0	0	0	1	0	0	0	269.184	0	0	0	3.4	103.4	0	0	0	-0.095	0	0	43	0	0	0	0	0	0	2019-02-14T01:00:00.000	1970-01-01T16:52:45.319	157	0	0	0	43	0	0	0	0	0	1	0.045	100	0	44	0	0	0
0	0	0	0	0	0	0	1	0	0	0	269.184	0	0	0	3.4	103.4	0	0	0	-0.09	0	0	43	0	0	0	0	0	0	2019-02-14T01:00:00.000	1970-01-01T16:52:45.439	157	0	0	0	43	0	0	0	0	0	1	0.045	100	0	44	0	0	0
0	0	0	0	0	0	0	1	0	0	0	269.184	0	0	0	3.4	103.4	0	0	0	-0.09	0	0	43	0	0	0	0	0	0	2019-02-14T01:00:00.000	1970-01-01T16:52:45.439	157	0	0	0	43	0	0	0	0	0	1	0.045	100	0	44	0	0	0
0	0	0	0	0	0	0	1	0	0	0	269.184	0	0	0	3.4	103.4	0	0	0	-0.09	0	0	43	0	0	0	0	0	0	2019-02-14T01:00:00.000	1970-01-01T16:52:45.439	157	0	0	0	43	0	0	0	0	0	1	0.045	100	0	44	0	0	0
0	0	0	0	0	0	0	1	0	0	0	269.184	0	0	0	3.4	103.4	0	0	0	-0.09	0	0	43	0	0	0	0	0	0	2019-02-14T01:00:00.000	1970-01-01T16:52:45.439	157	0	0	0	43	0	0	0	0	0	1	0.045	100	0	44	0	0	0
0	0	0	0	0	0	0	1	0	0	0	269.184	0	0	0	3.4	103.4	0	0	0	-0.09	0	0	43	0	0	0	0	0	0	2019-02-14T01:00:00.000	1970-01-01T16:52:45.439	157	0	0	0	43	0	0	0	0	0	1	0.045	100	0	44	0	0	0
0	0	0	0	0	0	0	1	0	0	0	269.184	0	0	0	3.4	103.4	0	0	0	-0.09	0	0	43	0	0	0	0	0	0	2019-02-14T01:00:00.000	1970-01-01T16:52:45.549	157	0	0	0	43	0	0	0	0	0	1	0.045	100	0	44	0	0	0
0	0	0	0	0	0	0	1	0	0	0	269.184	0	0	0	3.4	103.4	0	0	0	-0.09	0	0	43	0	0	0	0	0	0	2019-02-14T01:00:00.000	1970-01-01T16:52:45.549	157	0	0	0	43	0	0	0	0	0	1	0.045	100	0	44	0	0	0
0	0	0	0	0	0	0	1	0	0	0	269.184	0	0	0	3.4	103.4	0	0	0	-0.09	0	0	43	0	0	0	0	0	0	2019-02-14T01:00:00.000	1970-01-01T16:52:45.549	157	0	0	0	43	0	0	0	0	0	1	0.045	100	0	44	0	0	0
0	0	0	0	0	0	0	1	0	0	0	269.184	0	0	0	3.4	103.4	0	0	0	-0.09	0	0	43	0	0	0	0	0	0	2019-02-14T01:00:00.000	1970-01-01T16:52:45.549	157	0	0	0	43	0	0	0	0	0	1	0.045	100	0	44	0	0	0
0	0	0	0	0	0	0	1	0	0	0	269.184	0	0	0	3.4	103.4	0	0	0	-0.09	0	0	43	0	0	0	0	0	0	2019-02-14T01:00:00.000	1970-01-01T16:52:45.549	157	0	0	0	43	0	0	0	0	0	1	0.045	100	0	44	0	0	0
0	0	0	0	0	0	0	1	0	0	0	269.184	0	0	0	3.4	103.4	0	0	0	-0.095	0	0	43	0	0	0	0	0	0	2019-02-14T01:00:00.000	1970-01-01T16:52:45.679	157	0	0	0	43	0	0	0	0	0	1	0.037	100	0	44	0	0	0
0	0	0	0	0	0	0	1	0	0	0	269.184	0	0	0	3.4	103.4	0	0	0	-0.095	0	0	43	0	0	0	0	0	0	2019-02-14T01:00:00.000	1970-01-01T16:52:45.679	157	0	0	0	43	0	0	0	0	0	1	0.037	100	0	44	0	0	0
0	0	0	0	0	0	0	1	0	0	0	269.184	0	0	0	3.4	103.4	0	0	0	-0.095	0	0	43	0	0	0	0	0	0	2019-02-14T01:00:00.000	1970-01-01T16:52:45.679	157	0	0	0	43	0	0	0	0	0	1	0.037	100	0	44	0	0	0
0	0	0	0	0	0	0	1	0	0	0	269.184	0	0	0	3.4	103.4	0	0	0	-0.095	0	0	43	0	0	0	0	0	0	2019-02-14T01:00:00.000	1970-01-01T16:52:45.679	157	0	0	0	43	0	0	0	0	0	1	0.037	100	0	44	0	0	0
0	0	0	0	0	0	0	1	0	0	0	269.184	0	0	0	3.4	103.4	0	0	0	-0.095	0	0	43	0	0	0	0	0	0	2019-02-14T01:00:00.000	1970-01-01T16:52:45.679	157	0	0	0	43	0	0	0	0	0	1	0.037	100	0	44	0	0	0
0	0	0	0	0	0	0	1	0	0	0	269.184	0	0	0	3.4	103.4	0	0	0	-0.085	0	0	43	0	0	0	0	0	0	2019-02-14T01:00:00.000	1970-01-01T16:52:45.789	157	0	0	0	43	0	0	0	0	0	1	0.03	100	0	44	0	0	0
0	0	0	0	0	0	0	1	0	0	0	269.184	0	0	0	3.4	103.4	0	0	0	-0.085	0	0	43	0	0	0	0	0	0	2019-02-14T01:00:00.000	1970-01-01T16:52:45.789	157	0	0	0	43	0	0	0	0	0	1	0.03	100	0	44	0	0	0
0	0	0	0	0	0	0	1	0	0	0	269.184	0	0	0	3.4	103.4	0	0	0	-0.085	0	0	43	0	0	0	0	0	0	2019-02-14T01:00:00.000	1970-01-01T16:52:45.789	157	0	0	0	43	0	0	0	0	0	1	0.03	100	0	44	0	0	0
0	0	0	0	0	0	0	1	0	0	0	269.184	0	0	0	3.4	103.4	0	0	0	-0.085	0	0	43	0	0	0	0	0	0	2019-02-14T01:00:00.000	1970-01-01T16:52:45.789	157	0	0	0	43	0	0	0	0	0	1	0.03	100	0	44	0	0	0
0	0	0	0	0	0	0	1	0	0	0	269.184	0	0	0	3.4	103.4	0	0	0	-0.085	0	0	43	0	0	0	0	0	0	2019-02-14T01:00:00.000	1970-01-01T16:52:45.789	157	0	0	0	43	0	0	0	0	0	1	0.03	100	0	44	0	0	0
0	0	0	0	0	0	0	1	0	0	0	269.184	0	0	0	3.4	103.4	0	0	0	-0.1	0	0	43	0	0	0	0	0	0	2019-02-14T01:00:00.000	1970-01-01T16:52:45.909	157	0	0	0	43	0	0	0	0	0	1	0.045	100	0	44	0	0	0
0	0	0	0	0	0	0	1	0	0	0	269.184	0	0	0	3.4	103.4	0	0	0	-0.1	0	0	43	0	0	0	0	0	0	2019-02-14T01:00:00.000	1970-01-01T16:52:45.909	157	0	0	0	43	0	0	0	0	0	1	0.045	100	0	44	0	0	0
0	0	0	0	0	0	0	1	0	0	0	269.184	0	0	0	3.4	103.4	0	0	0	-0.1	0	0	43	0	0	0	0	0	0	2019-02-14T01:00:00.000	1970-01-01T16:52:45.909	157	0	0	0	43	0	0	0	0	0	1	0.045	100	0	44	0	0	0
0	0	0	0	0	0	0	1	0	0	0	269.184	0	0	0	3.4	103.4	0	0	0	-0.1	0	0	43	0	0	0	0	0	0	2019-02-14T01:00:00.000	1970-01-01T16:52:45.909	157	0	0	0	43	0	0	0	0	0	1	0.045	100	0	44	0	0	0
[truncated: 2,912 more rows]
[truncated: 5 more columns]
